# Supplementary material for: Exploration of prognostic genes associated with lymphangiogenesis in breast cancer based on transcriptomics and experimental verification
Source: PeerJ. 2025 Aug 27;13:e19890. doi: 10.7717/peerj.19890 (PMC12398285; doi:10.7717/peerj.19890)
Supplement: Supplemental Information 1 [file peerj-13-19890-s001.xlsx]

## Sheet: Supplementary Table 1
Table S1. Complete list of 179 lymphangiogenesis-related genes (L-RGs) retrieved from MSigDB database.
symbol
VEGFA
PTGS2
TGFB1
TNF
HIF1A
IL6
STAT3
ERBB2
MMP9
BDNF
NFKB1
IL1B
CDKN2A
CTNNB1
MTOR
CDH1
IGF1
MMP2
BCL2
LEP
CXCR4
HMGB1
NOTCH1
SERPINE1
CD44
MET
CXCL12
FOXP3
KDR
FGF2
GSK3B
IL4
LCN2
HGF
JUN
FLT1
SMAD4
NOS2
IL1A
RETN
CCL5
TWIST1
TNFRSF1A
FGFR3
CCN2
EPAS1
POSTN
IRS1
ADM
ELAVL1
SMARCA4
GH1
EGR1
SPARC
HPSE
TGFBR1
NTRK2
NGF
PGF
F2RL1
EIF4E
CEACAM1
GHR
CCR7
NRP1
NOX4
NKX2-1
CD24
PDGFB
APLN
MCAM
NES
IGFBP1
TBK1
MTA1
CSF2
GATA2
TEK
PLA2G2A
ITGA6
AREG
CD9
SIRT2
NRP2
NFATC1
S1PR1
ARF6
IL24
CCL21
TYMP
LOXL2
TNFSF15
MACC1
SIX1
TNFRSF6B
CXCL5
TIAM1
LAMC2
CPT1A
PFKFB3
ID2
NR2F2
LMO2
ADAMTS1
SEMA4D
NKX3-1
LYVE1
BACH1
LGALS8
SERPINE2
CEBPD
LPAR1
LTBR
MAFB
CCL19
SERPINA4
TBL1XR1
SEMA7A
SULF2
VEGFB
RIOX2
ZIC2
ITGA9
FOXK1
HOXD10
RSPO2
PLA2G10
LPAR3
CYP26B1
PTGER1
AKIP1
EMILIN1
SYCP3
PAPSS1
SCARA5
ADAMTS2
ADAMTS3
JPT1
AKT1
COL1A1
COL1A2
CREB1
CRK
GRB2
MAP2K4
MAPK1
MAPK11
MAPK3
PIK3CA
PIK3R1
RPS6KA1
SHC1
SOS1
TIE1
MIR9-1
VEGFC
FLT4
PDPN
MAPK14
ITGB1
FN1
BMPR2
EPHA2
VEGFD
FOXC2
ACVRL1
PROX1
ITGA2
ITGA5
FOXC1
ITGA4
SOX18
VASH1
PTPN14
CCBE1
ITGA1
ACVR2B
PPP3CB
CLEC14A
