# Supplementary material for: Exploration of prognostic genes associated with lymphangiogenesis in breast cancer based on transcriptomics and experimental verification
Source: PeerJ. 2025 Aug 27;13:e19890. doi: 10.7717/peerj.19890 (PMC12398285; doi:10.7717/peerj.19890)
Supplement: Supplemental Information 2 [file peerj-13-19890-s002.xlsx]

## Sheet: Sheet1
Table S2. Primer sequences used for RT-qPCR validation of prognostic genes (CCL19, CEBPD, ZIC2, CD24).
Primer	Sequence
CCL19 F	GAAGACTGCTGCCTGTCTGT
CCL19 R	GCAGTCTCTGGATGATGCGT
CD24 F	CGAGAGATAACCCTGCCCGA
CD24 R	GTCTAGCAGGATGCTGGGTG
ZIC2 F	TCCCTTCCGGAGTCTTTGAA
ZIC2 R	ACGTGGGCATGGAGATTAGC
CEBPD F	GGAGAGACTCAGCAACGACC
CEBPD R	TCTTTGCGCTCCTATGTCCC
internal referenceH-GAPDH F	ATGGGCAGCCGTTAGGAAAG
internal referenceH-GAPDH R	AGGAAAAGCATCACCCGGAG
