# Supplementary material for: Exploration of prognostic genes associated with lymphangiogenesis in breast cancer based on transcriptomics and experimental verification
Source: PeerJ. 2025 Aug 27;13:e19890. doi: 10.7717/peerj.19890 (PMC12398285; doi:10.7717/peerj.19890)
Supplement: Supplemental Information 3 [file peerj-13-19890-s003.xlsx]

## Sheet: GO
ONTOLOGY	ID	Description	GeneRatio	BgRatio	pvalue	p.adjust	qvalue	geneID	Count	richFactor
BP	GO:0001945	lymph vessel development	15/108	31/18903	2.28584988269541e-26	5.33327207955174e-23	2.44374746081805e-23	FGF2/PTPN14/CLEC14A/ACVRL1/FLT4/TIE1/KDR/CCBE1/PROX1/EPHA2/PPP3CB/VEGFC/SOX18/VEGFA/LGALS8	15	4.83870967741935
BP	GO:0036303	lymph vessel morphogenesis	14/108	24/18903	3.08103528570291e-26	5.33327207955174e-23	2.44374746081805e-23	FGF2/PTPN14/CLEC14A/ACVRL1/FLT4/TIE1/CCBE1/PROX1/EPHA2/PPP3CB/VEGFC/SOX18/VEGFA/LGALS8	14	5.83333333333333
BP	GO:0050673	epithelial cell proliferation	31/108	481/18903	2.62135542388281e-24	2.74395967569924e-21	1.25730403213195e-21	VEGFD/LEP/TEK/CXCL12/IGF1/FGF2/NRP1/ACVRL1/FLT4/TIE1/IL6/KDR/JUN/PROX1/VEGFB/EPHA2/ERBB2/RPS6KA1/FLT1/TGFB1/VEGFC/AKT1/HGF/TWIST1/VEGFA/LOXL2/SIX1/ITGA4/NKX3-1/GATA2/TNF	31	0.644490644490645
BP	GO:0050900	leukocyte migration	29/108	398/18903	3.17037513079058e-24	2.74395967569924e-21	1.25730403213195e-21	LYVE1/VEGFD/LEP/S1PR1/CXCL12/ITGA1/PIK3R1/MMP9/IL6/CD9/VEGFB/SOS1/ITGA9/CCL21/CXCR4/CCR7/ITGB1/FLT1/VEGFC/AKT1/ITGA6/VEGFA/SERPINE1/CCL5/CCL19/EMILIN1/ITGA4/IL1B/TNF	29	0.728643216080402
BP	GO:0001667	ameboidal-type cell migration	31/108	492/18903	5.1690340988252e-24	3.57903921002657e-21	1.63994408145886e-21	FN1/TEK/FGF2/CLEC14A/NRP1/ACVRL1/FLT4/MMP9/KDR/CCBE1/JUN/SEMA7A/PROX1/EPHA2/MET/ITGB1/PIK3CA/ARF6/TGFB1/VEGFC/AKT1/TWIST1/SOX18/SEMA4D/VEGFA/PTGS2/LGALS8/LOXL2/ITGA4/GATA2/TNF	31	0.630081300813008
BP	GO:0045765	regulation of angiogenesis	27/108	349/18903	3.07252746709268e-23	1.77284834851248e-20	8.12333139106784e-21	VEGFD/LEP/TEK/ADAMTS1/FGF2/NRP1/ACVRL1/TIE1/IL6/KDR/CCBE1/VEGFB/EPHA2/ERBB2/CXCR4/ITGB1/FLT1/VEGFC/ADM/HGF/TWIST1/VEGFA/SERPINE1/EMILIN1/IL1B/GATA2/TNF	27	0.773638968481375
BP	GO:1901342	regulation of vasculature development	27/108	355/18903	4.83262139258939e-23	2.39007646587778e-20	1.09515194565898e-20	VEGFD/LEP/TEK/ADAMTS1/FGF2/NRP1/ACVRL1/TIE1/IL6/KDR/CCBE1/VEGFB/EPHA2/ERBB2/CXCR4/ITGB1/FLT1/VEGFC/ADM/HGF/TWIST1/VEGFA/SERPINE1/EMILIN1/IL1B/GATA2/TNF	27	0.76056338028169
BP	GO:0001935	endothelial cell proliferation	22/108	199/18903	2.10474622846998e-22	8.22866450154257e-20	3.77043917535488e-20	VEGFD/LEP/TEK/CXCL12/FGF2/NRP1/ACVRL1/FLT4/TIE1/KDR/JUN/PROX1/VEGFB/EPHA2/FLT1/VEGFC/AKT1/VEGFA/LOXL2/ITGA4/GATA2/TNF	22	1.10552763819095
BP	GO:0014065	phosphatidylinositol 3-kinase signaling	20/108	145/18903	2.13916754806133e-22	8.22866450154257e-20	3.77043917535488e-20	FN1/LEP/TEK/IGF1/FGF2/PIK3R1/KDR/NTRK2/ERBB2/FLT1/PIK3CA/AKT1/HGF/TWIST1/SEMA4D/SERPINE2/CCL5/IRS1/NKX3-1/TNF	20	1.37931034482759
BP	GO:0045766	positive regulation of angiogenesis	21/108	187/18903	1.4820016345624e-21	4.45795749302569e-19	2.04267139225568e-19	VEGFD/TEK/FGF2/NRP1/ACVRL1/TIE1/KDR/CCBE1/VEGFB/CXCR4/ITGB1/FLT1/VEGFC/ADM/HGF/TWIST1/VEGFA/SERPINE1/EMILIN1/IL1B/GATA2	21	1.12299465240642
BP	GO:1904018	positive regulation of vasculature development	21/108	187/18903	1.4820016345624e-21	4.45795749302569e-19	2.04267139225568e-19	VEGFD/TEK/FGF2/NRP1/ACVRL1/TIE1/KDR/CCBE1/VEGFB/CXCR4/ITGB1/FLT1/VEGFC/ADM/HGF/TWIST1/VEGFA/SERPINE1/EMILIN1/IL1B/GATA2	21	1.12299465240642
BP	GO:0033674	positive regulation of kinase activity	29/108	496/18903	1.54521923501757e-21	4.45795749302569e-19	2.04267139225568e-19	GHR/LEP/TEK/EGR1/IGF1/FGF2/FLT4/TIE1/KDR/FGFR3/NTRK2/PROX1/EPHA2/MET/ERBB2/CCL21/CCR7/FLT1/PIK3CA/TGFB1/CD24/VEGFC/AKT1/VEGFA/CCL5/IRS1/CCL19/IL1B/TNF	29	0.584677419354839
BP	GO:0010631	epithelial cell migration	26/108	366/18903	1.94518229406909e-21	5.18017007851323e-19	2.37359491268188e-19	TEK/FGF2/CLEC14A/NRP1/ACVRL1/FLT4/MMP9/KDR/CCBE1/JUN/PROX1/EPHA2/MET/ITGB1/PIK3CA/ARF6/TGFB1/VEGFC/AKT1/SOX18/VEGFA/PTGS2/LGALS8/LOXL2/GATA2/TNF	26	0.710382513661202
BP	GO:0090132	epithelium migration	26/108	369/18903	2.39265132579329e-21	5.91668492135455e-19	2.71107184057932e-19	TEK/FGF2/CLEC14A/NRP1/ACVRL1/FLT4/MMP9/KDR/CCBE1/JUN/PROX1/EPHA2/MET/ITGB1/PIK3CA/ARF6/TGFB1/VEGFC/AKT1/SOX18/VEGFA/PTGS2/LGALS8/LOXL2/GATA2/TNF	26	0.704607046070461
BP	GO:0090130	tissue migration	26/108	374/18903	3.36488452454427e-21	7.76615348264818e-19	3.55851296736015e-19	TEK/FGF2/CLEC14A/NRP1/ACVRL1/FLT4/MMP9/KDR/CCBE1/JUN/PROX1/EPHA2/MET/ITGB1/PIK3CA/ARF6/TGFB1/VEGFC/AKT1/SOX18/VEGFA/PTGS2/LGALS8/LOXL2/GATA2/TNF	26	0.695187165775401
BP	GO:0001946	lymphangiogenesis	11/108	18/18903	3.86183645214151e-21	8.3560486233212e-19	3.8288075877482e-19	PTPN14/CLEC14A/ACVRL1/FLT4/TIE1/CCBE1/PROX1/EPHA2/PPP3CB/VEGFC/SOX18	11	6.11111111111111
BP	GO:0050921	positive regulation of chemotaxis	19/108	144/18903	6.23016716274133e-21	1.2687552186712e-18	5.81353678901002e-19	VEGFD/S1PR1/CXCL12/FGF2/NRP1/IL6/KDR/VEGFB/MET/CCL21/CXCR4/CCR7/LPAR1/TGFB1/VEGFC/VEGFA/SERPINE1/CCL5/CCL19	19	1.31944444444444
BP	GO:0048015	phosphatidylinositol-mediated signaling	20/108	178/18903	1.4525450625667e-20	2.79372833700328e-18	1.28010842648422e-18	FN1/LEP/TEK/IGF1/FGF2/PIK3R1/KDR/NTRK2/ERBB2/FLT1/PIK3CA/AKT1/HGF/TWIST1/SEMA4D/SERPINE2/CCL5/IRS1/NKX3-1/TNF	20	1.12359550561798
BP	GO:0060326	cell chemotaxis	24/108	319/18903	2.14920228775671e-20	3.5914876366413e-18	1.64564804901896e-18	VEGFD/S1PR1/CXCL12/FGF2/ITGA1/NRP1/IL6/KDR/VEGFB/EPHA2/MET/ITGA9/CCL21/CXCR4/CCR7/FLT1/LPAR1/VEGFC/HGF/VEGFA/SERPINE1/CCL5/CCL19/IL1B	24	0.752351097178683
BP	GO:0043542	endothelial cell migration	23/108	281/18903	2.17057802952603e-20	3.5914876366413e-18	1.64564804901896e-18	TEK/FGF2/CLEC14A/NRP1/ACVRL1/FLT4/KDR/CCBE1/PROX1/EPHA2/MET/ITGB1/PIK3CA/TGFB1/VEGFC/AKT1/SOX18/VEGFA/PTGS2/LGALS8/LOXL2/GATA2/TNF	23	0.818505338078292
BP	GO:0043410	positive regulation of MAPK cascade	28/108	496/18903	2.20147884838289e-20	3.5914876366413e-18	1.64564804901896e-18	GHR/LEP/TEK/IGF1/FGF2/ITGA1/NRP1/FLT4/IL6/KDR/FGFR3/NTRK2/JUN/SEMA7A/ERBB2/CCL21/CCR7/FLT1/LPAR1/TGFB1/CD24/HGF/VEGFA/CCL5/PLA2G2A/CCL19/IL1B/TNF	28	0.564516129032258
BP	GO:0048017	inositol lipid-mediated signaling	20/108	182/18903	2.28228561542775e-20	3.5914876366413e-18	1.64564804901896e-18	FN1/LEP/TEK/IGF1/FGF2/PIK3R1/KDR/NTRK2/ERBB2/FLT1/PIK3CA/AKT1/HGF/TWIST1/SEMA4D/SERPINE2/CCL5/IRS1/NKX3-1/TNF	20	1.0989010989011
BP	GO:0001936	regulation of endothelial cell proliferation	20/108	183/18903	2.55087397819855e-20	3.83961987501017e-18	1.75934420372779e-18	VEGFD/LEP/TEK/CXCL12/FGF2/NRP1/ACVRL1/FLT4/TIE1/KDR/JUN/PROX1/VEGFB/FLT1/VEGFC/AKT1/VEGFA/ITGA4/GATA2/TNF	20	1.09289617486339
BP	GO:0050678	regulation of epithelial cell proliferation	26/108	414/18903	4.34907047309679e-20	6.27353415744211e-18	2.87458298375301e-18	VEGFD/LEP/TEK/CXCL12/IGF1/FGF2/NRP1/ACVRL1/FLT4/TIE1/KDR/JUN/PROX1/VEGFB/ERBB2/FLT1/TGFB1/VEGFC/AKT1/TWIST1/VEGFA/SIX1/ITGA4/NKX3-1/GATA2/TNF	26	0.628019323671498
BP	GO:0050920	regulation of chemotaxis	21/108	230/18903	1.18363673596885e-19	1.63910015196967e-17	7.51048657307393e-18	VEGFD/S1PR1/CXCL12/FGF2/NRP1/IL6/KDR/SEMA7A/VEGFB/MET/CCL21/CXCR4/CCR7/LPAR1/TGFB1/VEGFC/SEMA4D/VEGFA/SERPINE1/CCL5/CCL19	21	0.91304347826087
BP	GO:0043491	protein kinase B signaling	20/108	218/18903	8.63362012528454e-19	1.14959972591289e-16	5.26755689425255e-17	LEP/TEK/IGF1/FGF2/KDR/NTRK2/EPHA2/MET/CCL21/CCR7/ITGB1/PIK3CA/TGFB1/AKT1/CCL5/HPSE/CCL19/NKX3-1/IL1B/TNF	20	0.917431192660551
BP	GO:0050679	positive regulation of epithelial cell proliferation	20/108	224/18903	1.48291545425937e-18	1.90142714912813e-16	8.71248962794884e-17	VEGFD/TEK/CXCL12/IGF1/FGF2/NRP1/ACVRL1/FLT4/KDR/JUN/PROX1/VEGFB/ERBB2/VEGFC/AKT1/TWIST1/VEGFA/ITGA4/GATA2/TNF	20	0.892857142857143
BP	GO:0001938	positive regulation of endothelial cell proliferation	16/108	115/18903	3.83020461756092e-18	4.73577442356997e-16	2.16996930776854e-16	VEGFD/TEK/CXCL12/FGF2/NRP1/ACVRL1/FLT4/KDR/JUN/PROX1/VEGFB/VEGFC/AKT1/VEGFA/ITGA4/GATA2	16	1.39130434782609
BP	GO:0007160	cell-matrix adhesion	20/108	238/18903	4.93619732800584e-18	5.89279832743318e-16	2.70012681426672e-16	LYVE1/FN1/TEK/ITGA1/CDKN2A/NRP1/ACVRL1/PIK3R1/KDR/ITGA9/CCL21/CCR7/ITGB1/ITGA6/VEGFA/SERPINE1/TIAM1/HPSE/EMILIN1/ITGA4	20	0.840336134453782
BP	GO:0018108	peptidyl-tyrosine phosphorylation	23/108	380/18903	1.8613673253057e-17	2.12109515130798e-15	9.7190257928825e-16	GHR/LEP/TEK/IGF1/NRP1/FLT4/TIE1/IL6/KDR/FGFR3/NTRK2/IL24/EPHA2/MET/ERBB2/FLT1/TGFB1/CD24/HGF/SEMA4D/VEGFA/CCL5/TNF	23	0.605263157894737
BP	GO:0002040	sprouting angiogenesis	18/108	185/18903	1.89930530590836e-17	2.12109515130798e-15	9.7190257928825e-16	VEGFD/TEK/FGF2/CLEC14A/NRP1/ACVRL1/FLT4/KDR/CCBE1/VEGFB/EPHA2/ITGB1/VEGFC/AKT1/VEGFA/PTGS2/LOXL2/GATA2	18	0.972972972972973
BP	GO:0018212	peptidyl-tyrosine modification	23/108	382/18903	2.08943542784331e-17	2.26050795349798e-15	1.03578262821048e-15	GHR/LEP/TEK/IGF1/NRP1/FLT4/TIE1/IL6/KDR/FGFR3/NTRK2/IL24/EPHA2/MET/ERBB2/FLT1/TGFB1/CD24/HGF/SEMA4D/VEGFA/CCL5/TNF	23	0.602094240837696
BP	GO:0014066	regulation of phosphatidylinositol 3-kinase signaling	15/108	111/18903	7.13652543878323e-17	7.4868639603235e-15	3.43054029864317e-15	FN1/LEP/TEK/IGF1/FGF2/KDR/NTRK2/FLT1/HGF/TWIST1/SEMA4D/SERPINE2/CCL5/NKX3-1/TNF	15	1.35135135135135
BP	GO:0070372	regulation of ERK1 and ERK2 cascade	21/108	315/18903	7.76048873576116e-17	7.90200353035445e-15	3.62076053399135e-15	FN1/TEK/IGF1/FGF2/NRP1/FLT4/KDR/FGFR3/JUN/SEMA7A/EPHA2/ERBB2/CCL21/CCR7/TGFB1/CCL5/PLA2G2A/CCL19/EMILIN1/IL1B/TNF	21	0.666666666666667
BP	GO:0032103	positive regulation of response to external stimulus	24/108	464/18903	1.21989350208977e-16	1.20664894406708e-14	5.52896092526098e-15	VEGFD/S1PR1/CXCL12/FGF2/NRP1/IL6/KDR/VEGFB/MET/CCL21/CXCR4/CCR7/LPAR1/TGFB1/VEGFC/VEGFA/SERPINE1/PTGS2/CCL5/PLA2G2A/CCL19/EMILIN1/IL1B/TNF	24	0.517241379310345
BP	GO:0010634	positive regulation of epithelial cell migration	17/108	176/18903	1.79236249682232e-16	1.72365526777746e-14	7.89792480324922e-15	TEK/FGF2/NRP1/FLT4/MMP9/KDR/CCBE1/JUN/PROX1/MET/ARF6/TGFB1/VEGFC/AKT1/VEGFA/PTGS2/GATA2	17	0.965909090909091
BP	GO:0010632	regulation of epithelial cell migration	20/108	292/18903	2.70176744265005e-16	2.52797807742013e-14	1.15833955507073e-14	TEK/FGF2/NRP1/ACVRL1/FLT4/MMP9/KDR/CCBE1/JUN/PROX1/EPHA2/MET/ARF6/TGFB1/VEGFC/AKT1/VEGFA/PTGS2/GATA2/TNF	20	0.684931506849315
BP	GO:0070371	ERK1 and ERK2 cascade	21/108	340/18903	3.63231326552025e-16	3.30922855927134e-14	1.51631470668671e-14	FN1/TEK/IGF1/FGF2/NRP1/FLT4/KDR/FGFR3/JUN/SEMA7A/EPHA2/ERBB2/CCL21/CCR7/TGFB1/CCL5/PLA2G2A/CCL19/EMILIN1/IL1B/TNF	21	0.617647058823529
BP	GO:0014068	positive regulation of phosphatidylinositol 3-kinase signaling	13/108	80/18903	7.53487624214064e-16	6.68865167956177e-14	3.0647931165738e-14	FN1/LEP/TEK/IGF1/FGF2/KDR/NTRK2/FLT1/HGF/SEMA4D/CCL5/NKX3-1/TNF	13	1.625
BP	GO:0051960	regulation of nervous system development	23/108	456/18903	9.90488034407208e-16	8.23040185318992e-14	3.77123524362468e-14	FN1/CXCL12/FGF2/TYMP/NRP1/IL6/NTRK2/SEMA7A/PROX1/CXCR4/ITGB1/TGFB1/VEGFC/AKT1/HGF/SEMA4D/VEGFA/SERPINE2/TIAM1/IL1B/CDH1/NGF/TNF	23	0.504385964912281
BP	GO:0002685	regulation of leukocyte migration	18/108	231/18903	9.98488959659089e-16	8.23040185318992e-14	3.77123524362468e-14	LYVE1/VEGFD/CXCL12/PIK3R1/IL6/CD9/VEGFB/CCL21/CCR7/VEGFC/AKT1/VEGFA/SERPINE1/CCL5/CCL19/EMILIN1/ITGA4/TNF	18	0.779220779220779
BP	GO:0050769	positive regulation of neurogenesis	18/108	231/18903	9.98488959659089e-16	8.23040185318992e-14	3.77123524362468e-14	FN1/CXCL12/FGF2/NRP1/IL6/NTRK2/SEMA7A/CXCR4/ITGB1/TGFB1/VEGFC/SEMA4D/VEGFA/SERPINE2/TIAM1/IL1B/NGF/TNF	18	0.779220779220779
BP	GO:0050918	positive chemotaxis	12/108	64/18903	1.65602168551328e-15	1.3332900174993e-13	6.10924034288498e-14	VEGFD/S1PR1/CXCL12/FGF2/NRP1/KDR/VEGFB/MET/VEGFC/HGF/VEGFA/CCL5	12	1.875
BP	GO:0031589	cell-substrate adhesion	21/108	369/18903	1.87211319954576e-15	1.47301270382441e-13	6.74946074573075e-14	LYVE1/FN1/TEK/COL1A1/ITGA1/CDKN2A/NRP1/ACVRL1/PIK3R1/KDR/ITGA9/CCL21/CCR7/ITGB1/ITGA6/VEGFA/SERPINE1/TIAM1/HPSE/EMILIN1/ITGA4	21	0.569105691056911
BP	GO:0097529	myeloid leukocyte migration	18/108	242/18903	2.26448410121776e-15	1.7421431018702e-13	7.9826375217197e-14	VEGFD/CXCL12/ITGA1/PIK3R1/IL6/CD9/VEGFB/ITGA9/CCL21/CCR7/FLT1/VEGFC/VEGFA/SERPINE1/CCL5/CCL19/EMILIN1/IL1B	18	0.743801652892562
BP	GO:0001503	ossification	22/108	429/18903	3.20939622642837e-15	2.41541950780327e-13	1.10676432796969e-13	LEP/S1PR1/COL1A1/IGF1/FGF2/MMP9/IL6/FGFR3/SEMA7A/COL1A2/EPHA2/TGFB1/VEGFC/AKT1/HGF/TWIST1/SEMA4D/PTGS2/MAPK11/RSPO2/CEBPD/TNF	22	0.512820512820513
BP	GO:0045785	positive regulation of cell adhesion	23/108	484/18903	3.56372072861477e-15	2.62502152392858e-13	1.20280563001623e-13	FN1/LEP/TEK/CXCL12/FOXP3/IGF1/SMARCA4/NRP1/IL6/KDR/ERBB2/CCL21/CCR7/PIK3CA/CD24/AKT1/VEGFA/CCL5/CCL19/EMILIN1/ITGA4/IL1B/TNF	23	0.475206611570248
BP	GO:0038084	vascular endothelial growth factor signaling pathway	11/108	50/18903	3.89750439358663e-15	2.81107504387436e-13	1.28805682481032e-13	VEGFD/NRP1/FLT4/KDR/CCBE1/VEGFB/FLT1/PIK3CA/VEGFC/ADAMTS3/VEGFA	11	2.2
BP	GO:0070482	response to oxygen levels	20/108	337/18903	4.24627082312292e-15	3.00012032441868e-13	1.37467886797986e-13	VEGFD/EPAS1/LEP/EGR1/CXCL12/COL1A1/ACVRL1/VEGFB/CXCR4/LPAR1/CD24/VEGFC/ADM/AKT1/TWIST1/VEGFA/PTGS2/LOXL2/NKX3-1/TNF	20	0.593471810089021
BP	GO:0002687	positive regulation of leukocyte migration	15/108	148/18903	5.81075217886293e-15	4.02336480864469e-13	1.84353758600978e-13	LYVE1/VEGFD/CXCL12/PIK3R1/IL6/VEGFB/CCL21/CCR7/VEGFC/VEGFA/SERPINE1/CCL5/CCL19/ITGA4/TNF	15	1.01351351351351
BP	GO:0042060	wound healing	22/108	442/18903	5.93857328907307e-15	4.03124327975901e-13	1.84714756380456e-13	MCAM/FN1/COL1A1/IGF1/FGF2/ACVRL1/IL6/KDR/CD9/IL24/ERBB2/CXCR4/ITGB1/PIK3CA/TGFB1/VEGFA/SERPINE1/SERPINE2/HPSE/EMILIN1/GATA2/TNF	22	0.497737556561086
BP	GO:0045446	endothelial cell differentiation	14/108	121/18903	7.5651049123123e-15	5.03661407815869e-13	2.30781641758191e-13	S1PR1/FOXP3/NRP1/ACVRL1/TIE1/KDR/PROX1/MET/CXCR4/SOX18/VEGFA/HPSE/IL1B/TNF	14	1.15702479338843
BP	GO:0035924	cellular response to vascular endothelial growth factor stimulus	12/108	74/18903	1.05562018518321e-14	6.77293725887191e-13	3.10341343583568e-13	VEGFD/NRP1/FLT4/KDR/CCBE1/VEGFB/FLT1/PIK3CA/VEGFC/AKT1/ADAMTS3/VEGFA	12	1.62162162162162
BP	GO:0045834	positive regulation of lipid metabolic process	15/108	154/18903	1.05643735407014e-14	6.77293725887191e-13	3.10341343583568e-13	TEK/FGF2/FGFR3/CCL21/CCR7/FLT1/TGFB1/ADM/AKT1/TWIST1/PTGS2/IRS1/CCL19/IL1B/TNF	15	0.974025974025974
BP	GO:0048661	positive regulation of smooth muscle cell proliferation	13/108	98/18903	1.18087225590114e-14	7.43305409078136e-13	3.40588419070434e-13	S1PR1/ADAMTS1/IGF1/FGF2/MMP9/IL6/JUN/PIK3CA/TGFB1/AKT1/PTGS2/CCL5/TNF	13	1.3265306122449
BP	GO:0010594	regulation of endothelial cell migration	17/108	230/18903	1.6026545489666e-14	9.90783937236137e-13	4.53985038588847e-13	TEK/FGF2/NRP1/ACVRL1/FLT4/KDR/CCBE1/PROX1/EPHA2/MET/TGFB1/VEGFC/AKT1/VEGFA/PTGS2/GATA2/TNF	17	0.739130434782609
BP	GO:0048010	vascular endothelial growth factor receptor signaling pathway	11/108	58/18903	2.28770106025419e-14	1.38947738080702e-12	6.3666952868016e-13	VEGFD/CLEC14A/NRP1/FLT4/KDR/VEGFB/FLT1/VEGFC/VEGFA/EMILIN1/IL1B	11	1.89655172413793
BP	GO:0010595	positive regulation of endothelial cell migration	14/108	131/18903	2.33458207682566e-14	1.39350399137422e-12	6.38514553498417e-13	TEK/FGF2/NRP1/FLT4/KDR/CCBE1/PROX1/MET/TGFB1/VEGFC/AKT1/VEGFA/PTGS2/GATA2	14	1.06870229007634
BP	GO:0051962	positive regulation of nervous system development	18/108	279/18903	2.70358083408209e-14	1.58640624535461e-12	7.26903892410653e-13	FN1/CXCL12/FGF2/NRP1/IL6/NTRK2/SEMA7A/CXCR4/ITGB1/TGFB1/VEGFC/SEMA4D/VEGFA/SERPINE2/TIAM1/IL1B/NGF/TNF	18	0.645161290322581
BP	GO:0030595	leukocyte chemotaxis	17/108	240/18903	3.23836292853184e-14	1.86853540976287e-12	8.56177707596049e-13	VEGFD/S1PR1/CXCL12/ITGA1/IL6/VEGFB/ITGA9/CCL21/CXCR4/CCR7/FLT1/VEGFC/VEGFA/SERPINE1/CCL5/CCL19/IL1B	17	0.708333333333333
BP	GO:0050767	regulation of neurogenesis	20/108	377/18903	3.55539429978707e-14	2.0178319780103e-12	9.24586576320813e-13	FN1/CXCL12/FGF2/NRP1/IL6/NTRK2/SEMA7A/PROX1/CXCR4/ITGB1/TGFB1/VEGFC/SEMA4D/VEGFA/SERPINE2/TIAM1/IL1B/CDH1/NGF/TNF	20	0.530503978779841
BP	GO:0048638	regulation of developmental growth	19/108	332/18903	4.25719269965132e-14	2.37716147196659e-12	1.08923419327242e-12	GHR/FN1/LEP/CXCL12/IGF1/FGF2/NRP1/FGFR3/SEMA7A/PROX1/CXCR4/PIK3CA/AKT1/SEMA4D/VEGFA/MAPK11/SIX1/CDH1/NGF	19	0.572289156626506
BP	GO:0022407	regulation of cell-cell adhesion	22/108	490/18903	4.88557804343939e-14	2.68474145815669e-12	1.23016977635140e-12	LEP/CXCL12/FOXP3/IGF1/SMARCA4/IL6/CD9/ERBB2/CCL21/CCR7/PIK3CA/TGFB1/CD24/AKT1/VEGFA/SERPINE2/CCL5/CCL19/ITGA4/IL1B/CDH1/TNF	22	0.448979591836735
BP	GO:0003158	endothelium development	14/108	139/18903	5.38275653774315e-14	2.91173486463544e-12	1.33417995104917e-12	S1PR1/FOXP3/NRP1/ACVRL1/TIE1/KDR/PROX1/MET/CXCR4/SOX18/VEGFA/HPSE/IL1B/TNF	14	1.00719424460432
BP	GO:0016049	cell growth	22/108	493/18903	5.52988158847731e-14	2.94530000912438e-12	1.34955976580329e-12	FN1/CXCL12/IGF1/SMARCA4/CDKN2A/NRP1/ACVRL1/SEMA7A/PPP3CB/ERBB2/IGFBP1/CXCR4/RPS6KA1/ITGB1/TGFB1/AKT1/SEMA4D/VEGFA/SERPINE2/ITGA4/CDH1/NGF	22	0.446247464503043
BP	GO:0043534	blood vessel endothelial cell migration	15/108	177/18903	8.41585620388156e-14	4.41449911785424e-12	2.02275842093294e-12	FGF2/CLEC14A/NRP1/ACVRL1/KDR/EPHA2/ITGB1/TGFB1/VEGFC/AKT1/SOX18/VEGFA/PTGS2/GATA2/TNF	15	0.847457627118644
BP	GO:0019216	regulation of lipid metabolic process	19/108	347/18903	9.42324596176146e-14	4.86914589845047e-12	2.23108117272184e-12	LEP/TEK/EGR1/FGF2/FGFR3/PROX1/CCL21/CCR7/FLT1/TGFB1/ADM/AKT1/TWIST1/TBL1XR1/PTGS2/IRS1/CCL19/IL1B/TNF	19	0.547550432276657
BP	GO:0043552	positive regulation of phosphatidylinositol 3-kinase activity	9/108	32/18903	1.16102997590717e-13	5.91100849498619e-12	2.70847085710851e-12	TEK/FGF2/FGFR3/CCL21/CCR7/FLT1/TGFB1/IRS1/CCL19	9	2.8125
BP	GO:0045927	positive regulation of growth	17/108	261/18903	1.28351084419096e-13	6.43987614867987e-12	2.95080220014612e-12	GHR/FN1/LEP/CXCL12/IGF1/FGF2/NRP1/SEMA7A/PROX1/ERBB2/IGFBP1/CXCR4/RPS6KA1/AKT1/SEMA4D/VEGFA/NGF	17	0.651340996168582
BP	GO:0010720	positive regulation of cell development	18/108	307/18903	1.40150878865744e-13	6.93146203761721e-12	3.17605074361919e-12	FN1/CXCL12/FGF2/NRP1/IL6/NTRK2/SEMA7A/CXCR4/ITGB1/TGFB1/VEGFC/SEMA4D/VEGFA/SERPINE2/TIAM1/IL1B/NGF/TNF	18	0.586319218241042
BP	GO:0036293	response to decreased oxygen levels	18/108	309/18903	1.5661787005943e-13	7.63677557951757e-12	3.49923098857763e-12	VEGFD/EPAS1/LEP/EGR1/CXCL12/ACVRL1/VEGFB/CXCR4/CD24/VEGFC/ADM/AKT1/TWIST1/VEGFA/PTGS2/LOXL2/NKX3-1/TNF	18	0.58252427184466
BP	GO:0070374	positive regulation of ERK1 and ERK2 cascade	16/108	223/18903	1.5996457545431e-13	7.69163000309473e-12	3.52436571943925e-12	TEK/IGF1/FGF2/NRP1/FLT4/KDR/FGFR3/JUN/SEMA7A/CCL21/CCR7/TGFB1/CCL5/PLA2G2A/CCL19/TNF	16	0.717488789237668
BP	GO:0051897	positive regulation of protein kinase B signaling	13/108	120/18903	1.73591423788017e-13	8.23251382402897e-12	3.7722029653719e-12	LEP/TEK/IGF1/FGF2/MET/CCL21/CCR7/ITGB1/PIK3CA/TGFB1/HPSE/CCL19/TNF	13	1.08333333333333
BP	GO:0061138	morphogenesis of a branching epithelium	15/108	188/18903	2.04915266149919e-13	9.58671150555433e-12	4.39270705672729e-12	FGF2/NRP1/TIE1/KDR/PROX1/EPHA2/MET/GRB2/ADM/HGF/VEGFA/RSPO2/SIX1/NKX3-1/TNF	15	0.797872340425532
BP	GO:0051896	regulation of protein kinase B signaling	15/108	189/18903	2.21547462425933e-13	1.02266308655811e-11	4.68592317018781e-12	LEP/TEK/IGF1/FGF2/NTRK2/EPHA2/MET/CCL21/CCR7/ITGB1/PIK3CA/TGFB1/HPSE/CCL19/TNF	15	0.793650793650794
BP	GO:0061042	vascular wound healing	8/108	22/18903	2.61012698653973e-13	1.18898152992112e-11	5.44800743589387e-12	MCAM/KDR/CXCR4/VEGFA/SERPINE1/HPSE/GATA2/TNF	8	3.63636363636364
BP	GO:0045860	positive regulation of protein kinase activity	20/108	420/18903	2.67847723475826e-13	1.20427119308222e-11	5.51806588213355e-12	GHR/LEP/EGR1/IGF1/FGF2/PROX1/ERBB2/CCL21/CCR7/FLT1/PIK3CA/TGFB1/CD24/VEGFC/AKT1/VEGFA/CCL5/CCL19/IL1B/TNF	20	0.476190476190476
BP	GO:0090218	positive regulation of lipid kinase activity	9/108	36/18903	3.82390411729858e-13	1.69722513513945e-11	7.77681984449253e-12	TEK/FGF2/FGFR3/CCL21/CCR7/FLT1/TGFB1/IRS1/CCL19	9	2.5
BP	GO:0060562	epithelial tube morphogenesis	18/108	335/18903	6.19505166447963e-13	2.71484415980107e-11	1.24396307240117e-11	FGF2/NRP1/ACVRL1/TIE1/KDR/PROX1/EPHA2/MET/CXCR4/TGFB1/ADM/TWIST1/SOX18/VEGFA/RSPO2/SIX1/NKX3-1/TNF	18	0.537313432835821
BP	GO:0001763	morphogenesis of a branching structure	15/108	203/18903	6.31251678080566e-13	2.73174163689365e-11	1.2517056300887e-11	FGF2/NRP1/TIE1/KDR/PROX1/EPHA2/MET/GRB2/ADM/HGF/VEGFA/RSPO2/SIX1/NKX3-1/TNF	15	0.738916256157636
BP	GO:0048732	gland development	20/108	441/18903	6.60825983073005e-13	2.82441920172684e-11	1.2941712235101e-11	FGF2/NRP1/IL6/JUN/PROX1/EPHA2/MET/RPS6KA1/PIK3CA/ARF6/TGFB1/AKT1/HGF/VEGFA/SERPINE2/SIX1/NKX3-1/CDH1/GATA2/TNF	20	0.453514739229025
BP	GO:0043551	regulation of phosphatidylinositol 3-kinase activity	10/108	56/18903	6.92702190595405e-13	2.92455485834304e-11	1.34005417359085e-11	TEK/FGF2/PIK3R1/FGFR3/CCL21/CCR7/FLT1/TGFB1/IRS1/CCL19	10	1.78571428571429
BP	GO:0048639	positive regulation of developmental growth	14/108	168/18903	7.52413842693064e-13	3.13838159446192e-11	1.43803127576214e-11	GHR/FN1/LEP/CXCL12/IGF1/FGF2/NRP1/SEMA7A/PROX1/CXCR4/AKT1/SEMA4D/VEGFA/NGF	14	0.833333333333333
BP	GO:0033002	muscle cell proliferation	16/108	247/18903	7.75917649297877e-13	3.19788916889196e-11	1.46529811715777e-11	S1PR1/ADAMTS1/IGF1/FGF2/MMP9/IL6/JUN/PIK3CA/TGFB1/AKT1/HGF/PTGS2/CCL5/MAPK11/SIX1/TNF	16	0.647773279352227
BP	GO:0001666	response to hypoxia	17/108	296/18903	9.89395699667608e-13	4.02975048499913e-11	1.8464635534354e-11	VEGFD/EPAS1/LEP/EGR1/CXCL12/ACVRL1/VEGFB/CXCR4/CD24/VEGFC/ADM/TWIST1/VEGFA/PTGS2/LOXL2/NKX3-1/TNF	17	0.574324324324324
BP	GO:0007159	leukocyte cell-cell adhesion	19/108	414/18903	2.15954445220234e-12	8.69342196921453e-11	3.98339472395217e-11	LEP/CXCL12/FOXP3/IGF1/SMARCA4/IL6/ERBB2/CCL21/CCR7/ITGB1/PIK3CA/CD24/AKT1/SEMA4D/CCL5/CCL19/ITGA4/IL1B/TNF	19	0.458937198067633
BP	GO:0010573	vascular endothelial growth factor production	10/108	63/18903	2.40538662225392e-12	9.57177986924492e-11	4.38586526283928e-11	FLT4/IL6/CCBE1/SULF2/TGFB1/ADAMTS3/PTGS2/HPSE/IL1B/TNF	10	1.58730158730159
BP	GO:0001558	regulation of cell growth	19/108	422/18903	3.01971581776108e-12	1.18798365466919e-10	5.44343509254301e-11	FN1/CXCL12/IGF1/SMARCA4/CDKN2A/NRP1/ACVRL1/SEMA7A/ERBB2/IGFBP1/CXCR4/RPS6KA1/TGFB1/AKT1/SEMA4D/VEGFA/SERPINE2/CDH1/NGF	19	0.450236966824645
BP	GO:0010575	positive regulation of vascular endothelial growth factor production	8/108	29/18903	3.38973641422978e-12	1.31856937820938e-10	6.04178920904113e-11	FLT4/IL6/CCBE1/SULF2/TGFB1/PTGS2/HPSE/IL1B	8	2.75862068965517
BP	GO:0001819	positive regulation of cytokine production	20/108	486/18903	3.92098322600221e-12	1.50827154760218e-10	6.91101955740974e-11	LEP/EGR1/FOXP3/FLT4/PIK3R1/IL6/CCBE1/SEMA7A/CCR7/SULF2/TGFB1/HGF/TWIST1/SERPINE1/PTGS2/HPSE/MAPK11/CCL19/IL1B/TNF	20	0.411522633744856
BP	GO:0050731	positive regulation of peptidyl-tyrosine phosphorylation	14/108	193/18903	5.02619509230182e-12	1.91216345159878e-10	8.7616842152676e-11	GHR/LEP/IGF1/NRP1/IL6/FGFR3/IL24/TGFB1/CD24/HGF/SEMA4D/VEGFA/CCL5/TNF	14	0.725388601036269
BP	GO:0043550	regulation of lipid kinase activity	10/108	68/18903	5.34429020306757e-12	2.01107963945869e-10	9.21492601375609e-11	TEK/FGF2/PIK3R1/FGFR3/CCL21/CCR7/FLT1/TGFB1/IRS1/CCL19	10	1.47058823529412
BP	GO:0060055	angiogenesis involved in wound healing	8/108	31/18903	6.17168322335657e-12	2.29745885153338e-10	1.05271382202585e-10	MCAM/KDR/CXCR4/VEGFA/SERPINE1/HPSE/GATA2/TNF	8	2.58064516129032
BP	GO:0002690	positive regulation of leukocyte chemotaxis	11/108	97/18903	8.31288095592062e-12	3.06161636908481e-10	1.40285684216936e-10	VEGFD/CXCL12/IL6/VEGFB/CCL21/CCR7/VEGFC/VEGFA/SERPINE1/CCL5/CCL19	11	1.1340206185567
BP	GO:0001649	osteoblast differentiation	15/108	246/18903	1.01365967247498e-11	3.69398924853514e-10	1.69261509852609e-10	COL1A1/IGF1/FGF2/IL6/SEMA7A/EPHA2/VEGFC/AKT1/HGF/TWIST1/SEMA4D/MAPK11/RSPO2/CEBPD/TNF	15	0.609756097560976
BP	GO:0030307	positive regulation of cell growth	13/108	167/18903	1.24214698651047e-11	4.47949257010338e-10	2.05253893494658e-10	FN1/CXCL12/IGF1/NRP1/SEMA7A/ERBB2/IGFBP1/CXCR4/RPS6KA1/AKT1/SEMA4D/VEGFA/NGF	13	0.778443113772455
BP	GO:0002064	epithelial cell development	14/108	213/18903	1.90647111934276e-11	6.80433300532436e-10	3.11779921524638e-10	EPAS1/FOXP3/KDR/PROX1/EPHA2/MET/CXCR4/AKT1/SOX18/VEGFA/HPSE/IL1B/GATA2/TNF	14	0.657276995305164
BP	GO:0007162	negative regulation of cell adhesion	16/108	308/18903	2.20863992687949e-11	7.80235859883346e-10	3.57510243803157e-10	CXCL12/FOXP3/COL1A1/CDKN2A/ACVRL1/PIK3R1/CD9/ERBB2/CCL21/TGFB1/AKT1/SEMA4D/VEGFA/SERPINE1/SERPINE2/CDH1	16	0.51948051948052
BP	GO:0048660	regulation of smooth muscle cell proliferation	13/108	175/18903	2.24791595586634e-11	7.86089397899926e-10	3.60192381232384e-10	S1PR1/ADAMTS1/IGF1/FGF2/MMP9/IL6/JUN/PIK3CA/TGFB1/AKT1/PTGS2/CCL5/TNF	13	0.742857142857143
BP	GO:0048659	smooth muscle cell proliferation	13/108	179/18903	2.99055686462914e-11	1.03533078653461e-09	4.74396757368012e-10	S1PR1/ADAMTS1/IGF1/FGF2/MMP9/IL6/JUN/PIK3CA/TGFB1/AKT1/PTGS2/CCL5/TNF	13	0.726256983240223
BP	GO:0061564	axon development	19/108	490/18903	4.00970729505127e-11	1.37441650054134e-09	6.29768514188876e-10	FN1/CXCL12/NRP1/NTRK2/JUN/SEMA7A/SOS1/EPHA2/PPP3CB/PLA2G10/ERBB2/ITGB1/LAMC2/SEMA4D/VEGFA/TIAM1/ITGA4/CDH1/NGF	19	0.387755102040816
BP	GO:1903037	regulation of leukocyte cell-cell adhesion	17/108	377/18903	4.60592054038649e-11	1.56330361870765e-09	7.16318086105516e-10	LEP/CXCL12/FOXP3/IGF1/SMARCA4/IL6/ERBB2/CCL21/CCR7/PIK3CA/CD24/AKT1/CCL5/CCL19/ITGA4/IL1B/TNF	17	0.450928381962865
BP	GO:1903039	positive regulation of leukocyte cell-cell adhesion	15/108	275/18903	4.93692868237867e-11	1.6593832134364e-09	7.60342516540077e-10	LEP/FOXP3/IGF1/SMARCA4/IL6/CCL21/CCR7/PIK3CA/CD24/AKT1/CCL5/CCL19/ITGA4/IL1B/TNF	15	0.545454545454545
BP	GO:0044089	positive regulation of cellular component biogenesis	19/108	498/18903	5.28891736209701e-11	1.76059922188268e-09	8.06720492376538e-10	TEK/NRP1/PIK3R1/KDR/NTRK2/EPHA2/MET/GRB2/CCL21/CCR7/PIK3CA/LPAR1/ARF6/TGFB1/SEMA4D/VEGFA/CCL19/EMILIN1/TNF	19	0.381526104417671
BP	GO:0007409	axonogenesis	18/108	438/18903	5.3793699600539e-11	1.77365512397206e-09	8.12702810005136e-10	FN1/CXCL12/NRP1/NTRK2/SEMA7A/SOS1/EPHA2/PPP3CB/PLA2G10/ERBB2/ITGB1/LAMC2/SEMA4D/VEGFA/TIAM1/ITGA4/CDH1/NGF	18	0.410958904109589
BP	GO:0043535	regulation of blood vessel endothelial cell migration	12/108	150/18903	5.79797281073157e-11	1.89363979912761e-09	8.6768073741534e-10	FGF2/NRP1/ACVRL1/KDR/EPHA2/TGFB1/VEGFC/AKT1/VEGFA/PTGS2/GATA2/TNF	12	0.8
BP	GO:0060560	developmental growth involved in morphogenesis	14/108	233/18903	6.33622481826492e-11	2.05009442250777e-09	9.39369483632586e-10	FN1/S1PR1/CXCL12/NRP1/SEMA7A/PPP3CB/CXCR4/ITGB1/SEMA4D/VEGFA/SIX1/ITGA4/CDH1/NGF	14	0.600858369098712
BP	GO:0050927	positive regulation of positive chemotaxis	7/108	25/18903	7.20737396976549e-11	2.31036376697483e-09	1.05862695637784e-09	VEGFD/S1PR1/CXCL12/KDR/VEGFB/VEGFC/VEGFA	7	2.8
BP	GO:0033627	cell adhesion mediated by integrin	10/108	88/18903	7.54777072514806e-11	2.3972827752718e-09	1.09845393363574e-09	ITGA1/EPHA2/ITGA9/CCL21/ITGB1/ITGA6/SERPINE1/CCL5/EMILIN1/ITGA4	10	1.13636363636364
BP	GO:0050926	regulation of positive chemotaxis	7/108	26/18903	9.81661857659912e-11	3.08955759201692e-09	1.41565973157272e-09	VEGFD/S1PR1/CXCL12/KDR/VEGFB/VEGFC/VEGFA	7	2.69230769230769
BP	GO:0031346	positive regulation of cell projection organization	16/108	352/18903	1.60370625710916e-10	4.94260325867496e-09	2.26473991633165e-09	FN1/CXCL12/NRP1/PIK3R1/NTRK2/SEMA7A/CCL21/CCR7/PIK3CA/HGF/ITGA6/SEMA4D/VEGFA/TIAM1/CCL19/NGF	16	0.454545454545455
BP	GO:0071695	anatomical structure maturation	14/108	250/18903	1.61215012057528e-10	4.94260325867496e-09	2.26473991633165e-09	EPAS1/LEP/S1PR1/IGF1/ACVRL1/KDR/FGFR3/PLA2G10/CCL21/SOX18/SEMA4D/VEGFA/CCL19/GATA2	14	0.56
BP	GO:0002688	regulation of leukocyte chemotaxis	11/108	127/18903	1.61327027218449e-10	4.94260325867496e-09	2.26473991633165e-09	VEGFD/CXCL12/IL6/VEGFB/CCL21/CCR7/VEGFC/VEGFA/SERPINE1/CCL5/CCL19	11	0.866141732283465
BP	GO:0071674	mononuclear cell migration	13/108	206/18903	1.73681131541004e-10	5.2744217315347e-09	2.41678176576448e-09	S1PR1/CXCL12/IL6/CCL21/CXCR4/CCR7/FLT1/AKT1/SERPINE1/CCL5/CCL19/ITGA4/TNF	13	0.631067961165048
BP	GO:0048762	mesenchymal cell differentiation	14/108	252/18903	1.79095452511116e-10	5.39155179646508e-09	2.47045168818537e-09	FN1/COL1A1/IGF1/NRP1/IL6/SEMA7A/TGFB1/HGF/TWIST1/SEMA4D/TIAM1/LOXL2/SIX1/IL1B	14	0.555555555555556
BP	GO:0060485	mesenchyme development	15/108	313/18903	3.0231068606053e-10	9.02241030294445e-09	4.13413978124518e-09	FN1/COL1A1/IGF1/NRP1/ACVRL1/IL6/SEMA7A/TGFB1/HGF/TWIST1/SEMA4D/TIAM1/LOXL2/SIX1/IL1B	15	0.479233226837061
BP	GO:0050730	regulation of peptidyl-tyrosine phosphorylation	14/108	266/18903	3.64651329953545e-10	1.07899393529844e-08	4.94403557570843e-09	GHR/LEP/IGF1/NRP1/IL6/FGFR3/IL24/TGFB1/CD24/HGF/SEMA4D/VEGFA/CCL5/TNF	14	0.526315789473684
BP	GO:0050863	regulation of T cell activation	16/108	376/18903	4.21440554268339e-10	1.23427724766188e-08	5.65555599813449e-09	LEP/FOXP3/IGF1/SMARCA4/CYP26B1/IL6/SOS1/ERBB2/CCL21/CCR7/PIK3CA/CD24/AKT1/CCL5/CCL19/IL1B	16	0.425531914893617
BP	GO:0043536	positive regulation of blood vessel endothelial cell migration	9/108	75/18903	4.24260521293367e-10	1.23427724766188e-08	5.65555599813449e-09	FGF2/NRP1/KDR/TGFB1/VEGFC/AKT1/VEGFA/PTGS2/GATA2	9	1.2
BP	GO:0010810	regulation of cell-substrate adhesion	13/108	222/18903	4.38249666249475e-10	1.26435028712974e-08	5.79335304419262e-09	FN1/TEK/COL1A1/CDKN2A/NRP1/ACVRL1/PIK3R1/KDR/CCL21/CCR7/VEGFA/SERPINE1/EMILIN1	13	0.585585585585586
BP	GO:0022409	positive regulation of cell-cell adhesion	15/108	322/18903	4.47793673562136e-10	1.28120801477034e-08	5.87059648593422e-09	LEP/FOXP3/IGF1/SMARCA4/IL6/CCL21/CCR7/PIK3CA/CD24/AKT1/CCL5/CCL19/ITGA4/IL1B/TNF	15	0.46583850931677
BP	GO:0050772	positive regulation of axonogenesis	9/108	78/18903	6.07352149575154e-10	1.7234861818272e-08	7.89715003804795e-09	FN1/CXCL12/NRP1/NTRK2/SEMA7A/SEMA4D/VEGFA/TIAM1/NGF	9	1.15384615384615
BP	GO:0048588	developmental cell growth	13/108	229/18903	6.42002813935512e-10	1.8070030421502e-08	8.27983089945072e-09	FN1/CXCL12/IGF1/NRP1/SEMA7A/PPP3CB/CXCR4/ITGB1/SEMA4D/VEGFA/ITGA4/CDH1/NGF	13	0.567685589519651
BP	GO:0001570	vasculogenesis	9/108	81/18903	8.56634719985488e-10	2.39166887144335e-08	1.09588159848738e-08	NRP1/TIE1/KDR/NTRK2/EPHA2/TGFB1/ADM/SOX18/VEGFA	9	1.11111111111111
BP	GO:0050867	positive regulation of cell activation	17/108	467/18903	1.24201229058812e-09	3.43987724001287e-08	1.57617896582425e-08	LEP/FOXP3/IGF1/SMARCA4/IL6/CCL21/RPS6KA1/CCR7/PIK3CA/TGFB1/CD24/AKT1/CCL5/CCL19/IL1B/GATA2/TNF	17	0.364025695931477
BP	GO:0043406	positive regulation of MAP kinase activity	10/108	117/18903	1.30035855192752e-09	3.57288992601037e-08	1.63712643087282e-08	GHR/FGF2/ERBB2/FLT1/TGFB1/CD24/VEGFA/CCL19/IL1B/TNF	10	0.854700854700855
BP	GO:1903131	mononuclear cell differentiation	17/108	473/18903	1.50643272438182e-09	4.10651188331484e-08	1.88163623343837e-08	LEP/EGR1/FOXP3/SMARCA4/CYP26B1/PIK3R1/IL6/JUN/SOS1/PPP3CB/ERBB2/CCR7/ITGB1/VEGFA/CCL19/ITGA4/IL1B	17	0.359408033826638
BP	GO:0010574	regulation of vascular endothelial growth factor production	8/108	59/18903	1.52033727717703e-09	4.11203722936474e-08	1.88416799071199e-08	FLT4/IL6/CCBE1/SULF2/TGFB1/PTGS2/HPSE/IL1B	8	1.35593220338983
BP	GO:0048754	branching morphogenesis of an epithelial tube	11/108	157/18903	1.57405771418285e-09	4.22433163294653e-08	1.93562217484582e-08	FGF2/NRP1/TIE1/KDR/EPHA2/MET/VEGFA/RSPO2/SIX1/NKX3-1/TNF	11	0.700636942675159
BP	GO:0048009	insulin-like growth factor receptor signaling pathway	7/108	38/18903	1.78041898480424e-09	4.74139271184021e-08	2.17254365190282e-08	GHR/IGF1/PIK3R1/IGFBP1/AKT1/IRS1/NKX3-1	7	1.84210526315789
BP	GO:0050870	positive regulation of T cell activation	13/108	251/18903	1.96746761538977e-09	5.19952128586213e-08	2.38246178898544e-08	LEP/FOXP3/IGF1/SMARCA4/IL6/CCL21/CCR7/PIK3CA/CD24/AKT1/CCL5/CCL19/IL1B	13	0.51792828685259
BP	GO:1901888	regulation of cell junction assembly	12/108	204/18903	2.03266575371829e-09	5.33112790861571e-08	2.44276498473163e-08	TEK/NRP1/ACVRL1/KDR/NTRK2/EPHA2/ARF6/SEMA4D/VEGFA/SIX1/IL1B/TNF	12	0.588235294117647
BP	GO:0021700	developmental maturation	14/108	304/18903	2.06801485192461e-09	5.38305820854362e-08	2.46655985900308e-08	EPAS1/LEP/S1PR1/IGF1/ACVRL1/KDR/FGFR3/PLA2G10/CCL21/SOX18/SEMA4D/VEGFA/CCL19/GATA2	14	0.460526315789474
BP	GO:0001952	regulation of cell-matrix adhesion	10/108	125/18903	2.48974526081315e-09	6.43246126338443e-08	2.94740464104118e-08	TEK/CDKN2A/NRP1/ACVRL1/PIK3R1/KDR/CCL21/CCR7/VEGFA/SERPINE1	10	0.8
BP	GO:0003007	heart morphogenesis	13/108	258/18903	2.74587790071091e-09	7.04165132760086e-08	3.22654034804783e-08	S1PR1/TEK/ADAMTS1/NRP1/ACVRL1/JUN/PROX1/SOS1/TGFB1/TWIST1/SOX18/VEGFA/SIX1	13	0.503875968992248
BP	GO:0034329	cell junction assembly	16/108	430/18903	2.92399128465304e-09	7.44327781431532e-08	3.41056878171218e-08	FN1/TEK/NRP1/ACVRL1/KDR/NTRK2/CD9/EPHA2/ARF6/ITGA6/SEMA4D/VEGFA/SIX1/IL1B/CDH1/TNF	16	0.372093023255814
BP	GO:0002042	cell migration involved in sprouting angiogenesis	9/108	94/18903	3.28448447279431e-09	8.29991623709045e-08	3.80308728428815e-08	FGF2/CLEC14A/NRP1/KDR/ITGB1/AKT1/VEGFA/PTGS2/GATA2	9	0.957446808510638
BP	GO:0030198	extracellular matrix organization	14/108	318/18903	3.68693765552906e-09	9.24940446626202e-08	4.23815030273249e-08	ADAMTS1/COL1A1/POSTN/MMP9/TIE1/IL6/COL1A2/SULF2/ITGB1/TGFB1/ADAMTS3/LOXL2/EMILIN1/TNF	14	0.440251572327044
BP	GO:0043062	extracellular structure organization	14/108	319/18903	3.83811743579214e-09	9.55939752713121e-08	4.38019157572037e-08	ADAMTS1/COL1A1/POSTN/MMP9/TIE1/IL6/COL1A2/SULF2/ITGB1/TGFB1/ADAMTS3/LOXL2/EMILIN1/TNF	14	0.438871473354232
BP	GO:1990138	neuron projection extension	11/108	172/18903	4.13049258208911e-09	1.02080904923038e-07	4.67742782447073e-08	FN1/CXCL12/NRP1/SEMA7A/PPP3CB/CXCR4/ITGB1/SEMA4D/VEGFA/ITGA4/CDH1	11	0.63953488372093
BP	GO:0045229	external encapsulating structure organization	14/108	321/18903	4.15754118837329e-09	1.02080904923038e-07	4.67742782447073e-08	ADAMTS1/COL1A1/POSTN/MMP9/TIE1/IL6/COL1A2/SULF2/ITGB1/TGFB1/ADAMTS3/LOXL2/EMILIN1/TNF	14	0.43613707165109
BP	GO:0042531	positive regulation of tyrosine phosphorylation of STAT protein	8/108	67/18903	4.3064084640322e-09	1.04991451425912e-07	4.81079136789957e-08	GHR/LEP/IGF1/IL6/FGFR3/IL24/CCL5/TNF	8	1.19402985074627
BP	GO:0032868	response to insulin	13/108	269/18903	4.54420475669991e-09	1.10014243830036e-07	5.04093968961852e-08	GHR/LEP/EGR1/COL1A1/PIK3R1/GRB2/IGFBP1/PIK3CA/ADM/AKT1/IRS1/RETN/IL1B	13	0.483271375464684
BP	GO:1901214	regulation of neuron death	14/108	325/18903	4.87009727167322e-09	1.1708525523981e-07	5.36493902661663e-08	GHR/EGR1/ITGA1/NRP1/KDR/NTRK2/JUN/PIK3CA/AKT1/NES/CCL5/SIX1/NGF/TNF	14	0.430769230769231
BP	GO:0048568	embryonic organ development	16/108	449/18903	5.41052288524477e-09	1.29180898129086e-07	5.91917095322241e-08	EPAS1/KDR/PROX1/EPHA2/GRB2/TGFB1/ADM/AKT1/TWIST1/SOX18/NES/HOXD10/VEGFA/SIX1/GATA2/TNF	16	0.356347438752784
BP	GO:0002696	positive regulation of leukocyte activation	16/108	450/18903	5.58391107219573e-09	1.32407535150285e-07	6.06701801427466e-08	LEP/FOXP3/IGF1/SMARCA4/IL6/CCL21/CCR7/PIK3CA/TGFB1/CD24/AKT1/CCL5/CCL19/IL1B/GATA2/TNF	16	0.355555555555556
BP	GO:0061448	connective tissue development	13/108	274/18903	5.6699764631637e-09	1.33533731397774e-07	6.11862121732023e-08	GHR/LEP/EGR1/COL1A1/FGF2/ACVRL1/FGFR3/SULF2/PIK3CA/TGFB1/TBL1XR1/RSPO2/LOXL2	13	0.474452554744526
BP	GO:0097191	extrinsic apoptotic signaling pathway	12/108	224/18903	5.85460557748078e-09	1.36950300738098e-07	6.27517112749896e-08	IGF1/NRP1/PIK3R1/FGFR3/TGFB1/AKT1/HGF/ITGA6/SERPINE1/IL1B/NGF/TNF	12	0.535714285714286
BP	GO:0150115	cell-substrate junction organization	9/108	101/18903	6.23858670098627e-09	1.44952933951775e-07	6.64185811260072e-08	FN1/TEK/NRP1/ACVRL1/PIK3R1/KDR/ARF6/ITGA6/VEGFA	9	0.891089108910891
BP	GO:0071902	positive regulation of protein serine/threonine kinase activity	12/108	229/18903	7.50218940679014e-09	1.73150531508716e-07	7.93389434107561e-08	GHR/FGF2/PROX1/ERBB2/FLT1/TGFB1/CD24/AKT1/VEGFA/CCL19/IL1B/TNF	12	0.524017467248908
BP	GO:0045165	cell fate commitment	13/108	282/18903	8.00415831038988e-09	1.8351255675874e-07	8.40869053590627e-08	EPAS1/FOXP3/FGF2/NRP1/CYP26B1/IL6/KDR/PROX1/ITGB1/SOX18/HOXD10/SIX1/GATA2	13	0.460992907801418
BP	GO:1902895	positive regulation of miRNA transcription	7/108	47/18903	8.50631071492628e-09	1.93742419046545e-07	8.87743091924785e-08	EGR1/SMARCA4/FGF2/JUN/TGFB1/GATA2/TNF	7	1.48936170212766
BP	GO:0150076	neuroinflammatory response	8/108	73/18903	8.62781671161379e-09	1.94361541903819e-07	8.90579961838472e-08	IGF1/MMP9/IL6/JUN/ITGB1/PTGS2/IL1B/TNF	8	1.0958904109589
BP	GO:0043010	camera-type eye development	14/108	340/18903	8.64577627186254e-09	1.94361541903819e-07	8.90579961838472e-08	SMARCA4/FGF2/NRP1/ACVRL1/KDR/NTRK2/JUN/PROX1/SOS1/EPHA2/FLT1/TWIST1/NES/VEGFA	14	0.411764705882353
BP	GO:0033135	regulation of peptidyl-serine phosphorylation	10/108	143/18903	9.20662231958582e-09	2.05634364325201e-07	9.42232926018053e-08	IL6/NTRK2/PIK3CA/TGFB1/AKT1/HGF/VEGFA/PTGS2/NGF/TNF	10	0.699300699300699
BP	GO:0043405	regulation of MAP kinase activity	11/108	186/18903	9.37481737322946e-09	2.080488317059e-07	9.53296206576032e-08	GHR/FGF2/SOS1/ERBB2/FLT1/TGFB1/CD24/VEGFA/CCL19/IL1B/TNF	11	0.591397849462366
BP	GO:0045123	cellular extravasation	8/108	74/18903	9.62814381554071e-09	2.12309769996191e-07	9.72820162924562e-08	LYVE1/LEP/CXCL12/ITGA1/CCL21/ITGB1/ITGA4/TNF	8	1.08108108108108
BP	GO:0050930	induction of positive chemotaxis	5/108	14/18903	1.06558734488636e-08	2.33485024556746e-07	1.06984685459277e-07	VEGFD/CXCL12/VEGFB/VEGFC/VEGFA	5	3.57142857142857
BP	GO:0033138	positive regulation of peptidyl-serine phosphorylation	9/108	108/18903	1.13045499877036e-08	2.46140578977547e-07	1.12783560618797e-07	IL6/NTRK2/PIK3CA/TGFB1/AKT1/VEGFA/PTGS2/NGF/TNF	9	0.833333333333333
BP	GO:0050727	regulation of inflammatory response	15/108	414/18903	1.36073642092615e-08	2.94429343077895e-07	1.34909854364191e-07	TEK/FOXP3/IGF1/MMP9/IL6/SEMA7A/PLA2G10/CCR7/HGF/SERPINE1/PTGS2/CCL5/PLA2G2A/IL1B/TNF	15	0.36231884057971
BP	GO:0007265	Ras protein signal transduction	14/108	353/18903	1.38938759241045e-08	2.9876148105124e-07	1.36894874257113e-07	IGF1/FGF2/CDKN2A/NRP1/JUN/COL1A2/SOS1/MET/GRB2/ITGB1/LPAR1/ARF6/TIAM1/NGF	14	0.396600566572238
BP	GO:0030217	T cell differentiation	13/108	296/18903	1.42586737375869e-08	3.04713138762506e-07	1.39621970906715e-07	LEP/EGR1/FOXP3/SMARCA4/CYP26B1/PIK3R1/IL6/SOS1/PPP3CB/ERBB2/CCR7/CCL19/IL1B	13	0.439189189189189
BP	GO:0030098	lymphocyte differentiation	15/108	419/18903	1.59646334596855e-08	3.37009518520922e-07	1.54420427623531e-07	LEP/EGR1/FOXP3/SMARCA4/CYP26B1/PIK3R1/IL6/SOS1/PPP3CB/ERBB2/CCR7/ITGB1/CCL19/ITGA4/IL1B	15	0.35799522673031
BP	GO:0040013	negative regulation of locomotion	15/108	419/18903	1.59646334596855e-08	3.37009518520922e-07	1.54420427623531e-07	CXCL12/FGF2/NRP1/ACVRL1/TIE1/SEMA7A/IL24/CCL21/TGFB1/AKT1/SEMA4D/SERPINE1/EMILIN1/CDH1/TNF	15	0.35799522673031
BP	GO:0007229	integrin-mediated signaling pathway	9/108	113/18903	1.68514542707307e-08	3.53574149607695e-07	1.62010472637902e-07	FN1/ADAMTS1/ITGA1/NRP1/SEMA7A/ITGA9/ITGB1/ITGA6/ITGA4	9	0.79646017699115
BP	GO:0043434	response to peptide hormone	15/108	421/18903	1.70075788680948e-08	3.54700229164725e-07	1.62526451199866e-07	GHR/LEP/EGR1/CXCL12/COL1A1/PIK3R1/GRB2/IGFBP1/PIK3CA/ADM/AKT1/PTGS2/IRS1/RETN/IL1B	15	0.356294536817102
BP	GO:0001655	urogenital system development	14/108	360/18903	1.77895236863077e-08	3.6659125596427e-07	1.67975013754798e-07	TEK/EGR1/ADAMTS1/FGF2/NRP1/CYP26B1/MMP9/PROX1/SULF2/CD24/VEGFA/SIX1/NKX3-1/GATA2	14	0.388888888888889
BP	GO:0002237	response to molecule of bacterial origin	14/108	360/18903	1.77895236863077e-08	3.6659125596427e-07	1.67975013754798e-07	FOXP3/IL6/IL24/CCR7/TGFB1/CD24/ADM/AKT1/SERPINE1/PTGS2/CCL5/IL1B/PTGER1/TNF	14	0.388888888888889
BP	GO:0150117	positive regulation of cell-substrate junction organization	6/108	31/18903	1.98179688158661e-08	4.05975195506086e-07	1.86021046437311e-07	TEK/NRP1/PIK3R1/KDR/ARF6/VEGFA	6	1.93548387096774
BP	GO:0050770	regulation of axonogenesis	10/108	156/18903	2.12408229495737e-08	4.32563112067201e-07	1.98203840154846e-07	FN1/CXCL12/NRP1/NTRK2/SEMA7A/SEMA4D/VEGFA/TIAM1/CDH1/NGF	10	0.641025641025641
BP	GO:0042509	regulation of tyrosine phosphorylation of STAT protein	8/108	82/18903	2.19267647245477e-08	4.43920815651369e-07	2.03408029793126e-07	GHR/LEP/IGF1/IL6/FGFR3/IL24/CCL5/TNF	8	0.975609756097561
BP	GO:0070997	neuron death	14/108	368/18903	2.34380296111053e-08	4.71758479730503e-07	2.16163467710745e-07	GHR/EGR1/ITGA1/NRP1/KDR/NTRK2/JUN/PIK3CA/AKT1/NES/CCL5/SIX1/NGF/TNF	14	0.380434782608696
BP	GO:0001822	kidney development	13/108	309/18903	2.37189776399368e-08	4.74653760632723e-07	2.1749010832604e-07	TEK/EGR1/ADAMTS1/FGF2/NRP1/CYP26B1/MMP9/PROX1/SULF2/CD24/VEGFA/SIX1/NKX3-1	13	0.420711974110032
BP	GO:0042063	gliogenesis	13/108	310/18903	2.46407855945271e-08	4.90266665104902e-07	2.24644064676058e-07	FGF2/IL6/NTRK2/CD9/ERBB2/CXCR4/LPAR1/TGFB1/VEGFC/AKT1/SERPINE2/IL1B/TNF	13	0.419354838709677
BP	GO:0050901	leukocyte tethering or rolling	6/108	33/18903	2.95367942649258e-08	5.84322181400989e-07	2.67741046359357e-07	LEP/CXCL12/CCL21/ITGB1/ITGA4/TNF	6	1.81818181818182
BP	GO:0010718	positive regulation of epithelial to mesenchymal transition	7/108	56/18903	3.00734271537012e-08	5.88215846362224e-07	2.69525154449169e-07	COL1A1/IL6/TGFB1/TWIST1/TIAM1/LOXL2/IL1B	7	1.25
BP	GO:2000630	positive regulation of miRNA metabolic process	7/108	56/18903	3.00734271537012e-08	5.88215846362224e-07	2.69525154449169e-07	EGR1/SMARCA4/FGF2/JUN/TGFB1/GATA2/TNF	7	1.25
BP	GO:0043087	regulation of GTPase activity	14/108	376/18903	3.06686944454227e-08	5.96488877359851e-07	2.73315922704033e-07	S1PR1/NTRK2/SOS1/EPHA2/MET/ERBB2/CCL21/CCR7/ITGB1/ITGA6/SEMA4D/TIAM1/CCL5/CCL19	14	0.372340425531915
BP	GO:0007260	tyrosine phosphorylation of STAT protein	8/108	86/18903	3.20336155951942e-08	6.19555179835544e-07	2.8388508498652e-07	GHR/LEP/IGF1/IL6/FGFR3/IL24/CCL5/TNF	8	0.930232558139535
BP	GO:0048675	axon extension	9/108	122/18903	3.29933372126675e-08	6.34571852390304e-07	2.90765843154911e-07	FN1/CXCL12/NRP1/SEMA7A/PPP3CB/ITGB1/SEMA4D/VEGFA/CDH1	9	0.737704918032787
BP	GO:0072001	renal system development	13/108	318/18903	3.32624767733132e-08	6.3621378226083e-07	2.91518188411649e-07	TEK/EGR1/ADAMTS1/FGF2/NRP1/CYP26B1/MMP9/PROX1/SULF2/CD24/VEGFA/SIX1/NKX3-1	13	0.408805031446541
BP	GO:0061756	leukocyte adhesion to vascular endothelial cell	7/108	57/18903	3.41235958914842e-08	6.49098291078672e-07	2.97421972287257e-07	LEP/CXCL12/IL6/CCL21/ITGB1/ITGA4/TNF	7	1.2280701754386
BP	GO:0009612	response to mechanical stimulus	11/108	211/18903	3.45823622757453e-08	6.54230263380493e-07	2.99773482597343e-07	CXCL12/COL1A1/FGF2/JUN/CXCR4/PIK3CA/SERPINE2/PTGS2/RETN/IL1B/TNF	11	0.521327014218009
BP	GO:0022612	gland morphogenesis	9/108	123/18903	3.54302432500015e-08	6.63024335845974e-07	3.03802996174977e-07	NRP1/IL6/PROX1/EPHA2/RPS6KA1/TGFB1/HGF/NKX3-1/TNF	9	0.731707317073171
BP	GO:0030282	bone mineralization	9/108	123/18903	3.54302432500015e-08	6.63024335845974e-07	3.03802996174977e-07	LEP/S1PR1/IGF1/FGFR3/COL1A2/TGFB1/TWIST1/PTGS2/RSPO2	9	0.731707317073171
BP	GO:0042098	T cell proliferation	11/108	212/18903	3.63028060084311e-08	6.74958038783085e-07	3.09271113273772e-07	LEP/FOXP3/IGF1/IL6/SOS1/PPP3CB/ERBB2/CD24/CCL5/CCL19/IL1B	11	0.518867924528302
BP	GO:0010975	regulation of neuron projection development	15/108	446/18903	3.64578721122002e-08	6.74958038783085e-07	3.09271113273772e-07	FN1/CXCL12/NRP1/NTRK2/SEMA7A/LPAR1/ARF6/AKT1/HGF/ITGA6/SEMA4D/VEGFA/TIAM1/CDH1/NGF	15	0.336322869955157
BP	GO:1903829	positive regulation of protein localization	15/108	451/18903	4.22085535179737e-08	7.77266022761835e-07	3.56149440938334e-07	LEP/IGF1/PIK3R1/EPHA2/PPP3CB/ERBB2/ITGB1/ARF6/TGFB1/VEGFC/AKT1/PTGS2/IL1B/CDH1/TNF	15	0.332594235033259
BP	GO:0090050	positive regulation of cell migration involved in sprouting angiogenesis	6/108	35/18903	4.28876382995698e-08	7.8559261266196e-07	3.59964750306052e-07	FGF2/NRP1/KDR/VEGFA/PTGS2/GATA2	6	1.71428571428571
BP	GO:0001654	eye development	14/108	388/18903	4.53462501604901e-08	8.26256410819035e-07	3.78597224331626e-07	SMARCA4/FGF2/NRP1/ACVRL1/KDR/NTRK2/JUN/PROX1/SOS1/EPHA2/FLT1/TWIST1/NES/VEGFA	14	0.360824742268041
BP	GO:0150063	visual system development	14/108	392/18903	5.14989914184241e-08	9.33452922987353e-07	4.27715514288042e-07	SMARCA4/FGF2/NRP1/ACVRL1/KDR/NTRK2/JUN/PROX1/SOS1/EPHA2/FLT1/TWIST1/NES/VEGFA	14	0.357142857142857
BP	GO:0001701	in utero embryonic development	14/108	393/18903	5.31508346987153e-08	9.58375988161211e-07	4.39135459928531e-07	EPAS1/IGF1/ACVRL1/TIE1/GRB2/ITGB1/ADM/AKT1/ADAMTS3/TWIST1/TBL1XR1/SOX18/VEGFA/GATA2	14	0.356234096692112
BP	GO:1902893	regulation of miRNA transcription	7/108	61/18903	5.52638880625861e-08	9.91313888459446e-07	4.54227866432055e-07	EGR1/SMARCA4/FGF2/JUN/TGFB1/GATA2/TNF	7	1.14754098360656
BP	GO:0071900	regulation of protein serine/threonine kinase activity	14/108	395/18903	5.65992586600445e-08	1.01003419320141e-06	4.62805658169761e-07	GHR/FGF2/CDKN2A/PROX1/SOS1/ERBB2/FLT1/TGFB1/CD24/AKT1/VEGFA/CCL19/IL1B/TNF	14	0.354430379746835
BP	GO:0051781	positive regulation of cell division	8/108	93/18903	5.94895977203822e-08	1.05616916568186e-06	4.83945067555282e-07	VEGFD/FGF2/VEGFB/TGFB1/VEGFC/VEGFA/NKX3-1/IL1B	8	0.860215053763441
BP	GO:0031214	biomineral tissue development	10/108	174/18903	5.99669887598923e-08	1.05921283207524e-06	4.85339699576572e-07	LEP/S1PR1/COL1A1/IGF1/FGFR3/COL1A2/TGFB1/TWIST1/PTGS2/RSPO2	10	0.574712643678161
BP	GO:0061614	miRNA transcription	7/108	62/18903	6.20065792990464e-08	1.08672967971739e-06	4.97948136864637e-07	EGR1/SMARCA4/FGF2/JUN/TGFB1/GATA2/TNF	7	1.12903225806452
BP	GO:0048880	sensory system development	14/108	398/18903	6.21526506597467e-08	1.08672967971739e-06	4.97948136864637e-07	SMARCA4/FGF2/NRP1/ACVRL1/KDR/NTRK2/JUN/PROX1/SOS1/EPHA2/FLT1/TWIST1/NES/VEGFA	14	0.351758793969849
BP	GO:1903532	positive regulation of secretion by cell	12/108	278/18903	6.42616199602149e-08	1.11795843367972e-06	5.12257398995207e-07	LEP/CXCL12/IGF1/PPP3CB/PLA2G10/ARF6/TGFB1/VEGFC/RETN/NKX3-1/IL1B/GATA2	12	0.431654676258993
BP	GO:0051251	positive regulation of lymphocyte activation	14/108	400/18903	6.61241259848652e-08	1.14460862079802e-06	5.24468725574694e-07	LEP/FOXP3/IGF1/SMARCA4/IL6/CCL21/CCR7/PIK3CA/TGFB1/CD24/AKT1/CCL5/CCL19/IL1B	14	0.35
BP	GO:0046777	protein autophosphorylation	11/108	226/18903	6.9805224603293e-08	1.20231685361493e-06	5.50911094407764e-07	TEK/FLT4/KDR/FGFR3/NTRK2/JUN/ERBB2/FLT1/VEGFC/AKT1/VEGFA	11	0.486725663716814
BP	GO:0032496	response to lipopolysaccharide	13/108	339/18903	7.02705640574151e-08	1.20434006320184e-06	5.51838145047027e-07	FOXP3/IL6/IL24/CCR7/TGFB1/ADM/AKT1/SERPINE1/PTGS2/CCL5/IL1B/PTGER1/TNF	13	0.383480825958702
BP	GO:0010001	glial cell differentiation	11/108	227/18903	7.30138854410968e-08	1.24519246993634e-06	5.70557041014949e-07	FGF2/IL6/NTRK2/ERBB2/CXCR4/LPAR1/TGFB1/AKT1/SERPINE2/IL1B/TNF	11	0.484581497797357
BP	GO:0043547	positive regulation of GTPase activity	12/108	283/18903	7.8066406632723e-08	1.32483284197298e-06	6.07048889553734e-07	S1PR1/SOS1/EPHA2/ERBB2/CCL21/CCR7/ITGB1/ITGA6/SEMA4D/TIAM1/CCL5/CCL19	12	0.424028268551237
BP	GO:0001885	endothelial cell development	7/108	65/18903	8.6553209718033e-08	1.46145771951778e-06	6.69651489346986e-07	FOXP3/MET/SOX18/VEGFA/HPSE/IL1B/TNF	7	1.07692307692308
BP	GO:0110148	biomineralization	10/108	181/18903	8.69613778800299e-08	1.46145771951778e-06	6.69651489346986e-07	LEP/S1PR1/COL1A1/IGF1/FGFR3/COL1A2/TGFB1/TWIST1/PTGS2/RSPO2	10	0.552486187845304
BP	GO:0061041	regulation of wound healing	9/108	137/18903	9.02750542594634e-08	1.50981757413653e-06	6.9181035733034e-07	FGF2/CD9/CXCR4/ITGB1/SERPINE1/SERPINE2/HPSE/EMILIN1/TNF	9	0.656934306569343
BP	GO:0042129	regulation of T cell proliferation	10/108	182/18903	9.15829044973682e-08	1.52432699697062e-06	6.98458689663633e-07	LEP/FOXP3/IGF1/IL6/SOS1/ERBB2/CD24/CCL5/CCL19/IL1B	10	0.549450549450549
BP	GO:0060348	bone development	11/108	233/18903	9.51707233271925e-08	1.56895735313686e-06	7.18908671950271e-07	GHR/LEP/COL1A1/IGF1/CYP26B1/KDR/FGFR3/SULF2/TWIST1/SEMA4D/MAPK11	11	0.472103004291846
BP	GO:2001234	negative regulation of apoptotic signaling pathway	11/108	233/18903	9.51707233271925e-08	1.56895735313686e-06	7.18908671950271e-07	CXCL12/IGF1/NRP1/MMP9/AKT1/HGF/ITGA6/SERPINE1/PTGS2/IL1B/TNF	11	0.472103004291846
BP	GO:2001237	negative regulation of extrinsic apoptotic signaling pathway	8/108	99/18903	9.72187604153688e-08	1.5951248746825e-06	7.30898837345776e-07	IGF1/NRP1/AKT1/HGF/ITGA6/SERPINE1/IL1B/TNF	8	0.808080808080808
BP	GO:0150077	regulation of neuroinflammatory response	6/108	41/18903	1.15550200219322e-07	1.86256019988625e-06	8.53439819157949e-07	IGF1/MMP9/IL6/PTGS2/IL1B/TNF	6	1.46341463414634
BP	GO:0001889	liver development	9/108	141/18903	1.15670260824825e-07	1.86256019988625e-06	8.53439819157949e-07	IL6/JUN/PROX1/MET/RPS6KA1/PIK3CA/ARF6/HGF/TNF	9	0.638297872340425
BP	GO:0045667	regulation of osteoblast differentiation	9/108	141/18903	1.15670260824825e-07	1.86256019988625e-06	8.53439819157949e-07	IGF1/FGF2/IL6/VEGFC/HGF/TWIST1/SEMA4D/CEBPD/TNF	9	0.638297872340425
BP	GO:0070555	response to interleukin-1	9/108	141/18903	1.15670260824825e-07	1.86256019988625e-06	8.53439819157949e-07	GHR/EGR1/IL6/CCL21/CCL5/MAPK11/CCL19/NKX3-1/IL1B	9	0.638297872340425
BP	GO:0051222	positive regulation of protein transport	12/108	294/18903	1.18171622820421e-07	1.89402851020509e-06	8.67858847906312e-07	LEP/IGF1/PIK3R1/PPP3CB/ERBB2/ARF6/TGFB1/VEGFC/PTGS2/IL1B/CDH1/TNF	12	0.408163265306122
BP	GO:0042552	myelination	9/108	142/18903	1.22915386138629e-07	1.96098187470937e-06	8.98537409221023e-07	TYMP/NTRK2/CD9/ERBB2/CXCR4/LPAR1/AKT1/HGF/TNF	9	0.633802816901408
BP	GO:0010721	negative regulation of cell development	10/108	188/18903	1.24136170887589e-07	1.97137350281117e-06	9.03298935430214e-07	IGF1/NRP1/IL6/SEMA7A/PROX1/SEMA4D/VEGFA/IL1B/CDH1/TNF	10	0.531914893617021
BP	GO:0060537	muscle tissue development	14/108	422/18903	1.27708079661547e-07	2.01883731410171e-06	9.25047229271574e-07	S1PR1/EGR1/IGF1/FGF2/CYP26B1/PROX1/PPP3CB/ITGB1/TGFB1/TWIST1/HOXD10/VEGFA/MAPK11/SIX1	14	0.33175355450237
BP	GO:0014015	positive regulation of gliogenesis	7/108	69/18903	1.31645468407659e-07	2.06224711143582e-06	9.44937941844927e-07	IL6/CXCR4/TGFB1/VEGFC/SERPINE2/IL1B/TNF	7	1.01449275362319
BP	GO:0150116	regulation of cell-substrate junction organization	7/108	69/18903	1.31645468407659e-07	2.06224711143582e-06	9.44937941844927e-07	TEK/NRP1/ACVRL1/PIK3R1/KDR/ARF6/VEGFA	7	1.01449275362319
BP	GO:0007272	ensheathment of neurons	9/108	144/18903	1.38599578895548e-07	2.1421059916803e-06	9.81529912573265e-07	TYMP/NTRK2/CD9/ERBB2/CXCR4/LPAR1/AKT1/HGF/TNF	9	0.625
BP	GO:0008366	axon ensheathment	9/108	144/18903	1.38599578895548e-07	2.1421059916803e-06	9.81529912573265e-07	TYMP/NTRK2/CD9/ERBB2/CXCR4/LPAR1/AKT1/HGF/TNF	9	0.625
BP	GO:0061008	hepaticobiliary system development	9/108	144/18903	1.38599578895548e-07	2.1421059916803e-06	9.81529912573265e-07	IL6/JUN/PROX1/MET/RPS6KA1/PIK3CA/ARF6/HGF/TNF	9	0.625
BP	GO:0019221	cytokine-mediated signaling pathway	15/108	496/18903	1.45449177247478e-07	2.23797800724785e-06	1.02545922859391e-06	GHR/LEP/EGR1/CXCL12/IL6/SOS1/CCL21/CXCR4/CCR7/CD24/AKT1/CCL5/CCL19/IL1B/TNF	15	0.30241935483871
BP	GO:0045444	fat cell differentiation	11/108	244/18903	1.51717390887955e-07	2.32409560731903e-06	1.06491899426245e-06	LEP/IL6/TGFB1/AKT1/TBL1XR1/PTGS2/RETN/SIX1/CEBPD/GATA2/TNF	11	0.450819672131148
BP	GO:0002548	monocyte chemotaxis	7/108	71/18903	1.60759839726582e-07	2.45176460411201e-06	1.12341793864113e-06	CXCL12/IL6/CCL21/FLT1/SERPINE1/CCL5/CCL19	7	0.985915492957746
BP	GO:0032956	regulation of actin cytoskeleton organization	13/108	365/18903	1.6520322766647e-07	2.50507919028558e-06	1.14784710382206e-06	S1PR1/TEK/CXCL12/NRP1/PIK3R1/PROX1/MET/GRB2/CCL21/CCR7/PIK3CA/LPAR1/ARF6	13	0.356164383561644
BP	GO:0042102	positive regulation of T cell proliferation	8/108	106/18903	1.65702811835759e-07	2.50507919028558e-06	1.14784710382206e-06	LEP/FOXP3/IGF1/IL6/CD24/CCL5/CCL19/IL1B	8	0.754716981132075
BP	GO:0051047	positive regulation of secretion	12/108	304/18903	1.69665670727063e-07	2.55383718285692e-06	1.17018840176514e-06	LEP/CXCL12/IGF1/PPP3CB/PLA2G10/ARF6/TGFB1/VEGFC/RETN/NKX3-1/IL1B/GATA2	12	0.394736842105263
BP	GO:0051495	positive regulation of cytoskeleton organization	10/108	195/18903	1.74638849156729e-07	2.61731470034889e-06	1.19927430247979e-06	TEK/NRP1/PROX1/MET/GRB2/CCL21/CCR7/LPAR1/ARF6/NES	10	0.512820512820513
BP	GO:0032535	regulation of cellular component size	13/108	367/18903	1.75909741489785e-07	2.62499795274843e-06	1.202794829515e-06	FN1/CXCL12/NRP1/SEMA7A/GRB2/CCL21/CCR7/PIK3CA/ARF6/SEMA4D/VEGFA/CDH1/NGF	13	0.354223433242507
BP	GO:0032963	collagen metabolic process	8/108	107/18903	1.78251597113543e-07	2.648528022348e-06	1.21357649356272e-06	COL1A1/MMP9/IL6/COL1A2/ITGB1/TGFB1/ADAMTS3/EMILIN1	8	0.747663551401869
BP	GO:0045926	negative regulation of growth	11/108	249/18903	1.86075280854985e-07	2.75295992444426e-06	1.26142801731202e-06	SMARCA4/CDKN2A/NRP1/ACVRL1/FGFR3/SEMA7A/TGFB1/SEMA4D/SERPINE2/MAPK11/CDH1	11	0.441767068273092
BP	GO:0032102	negative regulation of response to external stimulus	14/108	436/18903	1.90158267916266e-07	2.80139541926005e-06	1.28362154423208e-06	LEP/TEK/FOXP3/IGF1/FGF2/NRP1/SEMA7A/CD9/PLA2G10/HGF/SEMA4D/SERPINE1/SERPINE2/TNF	14	0.321100917431193
BP	GO:0061387	regulation of extent of cell growth	8/108	108/18903	1.91607360883609e-07	2.81078255669091e-06	1.28792280486886e-06	FN1/CXCL12/NRP1/SEMA7A/SEMA4D/VEGFA/CDH1/NGF	8	0.740740740740741
BP	GO:0071677	positive regulation of mononuclear cell migration	7/108	73/18903	1.95124444107093e-07	2.8502988417669e-06	1.30602947932218e-06	CXCL12/CCL21/CCR7/SERPINE1/CCL5/ITGA4/TNF	7	0.958904109589041
BP	GO:0031295	T cell costimulation	6/108	45/18903	2.05475860281749e-07	2.98889675754375e-06	1.36953614084297e-06	CCL21/CCR7/PIK3CA/CD24/AKT1/CCL19	6	1.33333333333333
BP	GO:1904951	positive regulation of establishment of protein localization	12/108	310/18903	2.09414174109762e-07	3.03343878982426e-06	1.38994565242639e-06	LEP/IGF1/PIK3R1/PPP3CB/ERBB2/ARF6/TGFB1/VEGFC/PTGS2/IL1B/CDH1/TNF	12	0.387096774193548
BP	GO:2000628	regulation of miRNA metabolic process	7/108	74/18903	2.14504654585316e-07	3.09422964239318e-06	1.41780050201785e-06	EGR1/SMARCA4/FGF2/JUN/TGFB1/GATA2/TNF	7	0.945945945945946
BP	GO:0007173	epidermal growth factor receptor signaling pathway	8/108	110/18903	2.20912322145441e-07	3.17343759032164e-06	1.45409421040917e-06	ITGA1/MMP9/SOS1/GRB2/ERBB2/PIK3CA/TGFB1/AKT1	8	0.727272727272727
BP	GO:0051216	cartilage development	10/108	201/18903	2.31481402759943e-07	3.30878329673728e-06	1.51611068387092e-06	GHR/LEP/COL1A1/FGF2/ACVRL1/FGFR3/SULF2/TGFB1/RSPO2/LOXL2	10	0.497512437810945
BP	GO:0018105	peptidyl-serine phosphorylation	12/108	313/18903	2.3224562134811e-07	3.30878329673728e-06	1.51611068387092e-06	IL6/NTRK2/IL24/RPS6KA1/PIK3CA/TGFB1/AKT1/HGF/VEGFA/PTGS2/NGF/TNF	12	0.383386581469649
BP	GO:0071347	cellular response to interleukin-1	8/108	111/18903	2.36952232794367e-07	3.36200258169713e-06	1.54049618128176e-06	EGR1/IL6/CCL21/CCL5/MAPK11/CCL19/NKX3-1/IL1B	8	0.720720720720721
BP	GO:0022408	negative regulation of cell-cell adhesion	10/108	202/18903	2.42388045006551e-07	3.42509147678645e-06	1.56940401213694e-06	CXCL12/FOXP3/CD9/ERBB2/CCL21/TGFB1/AKT1/VEGFA/SERPINE2/CDH1	10	0.495049504950495
BP	GO:0006898	receptor-mediated endocytosis	11/108	257/18903	2.55500009287736e-07	3.58113778200058e-06	1.64090566374012e-06	LYVE1/CD9/GRB2/CCL21/ITGB1/ARF6/ADM/VEGFA/SERPINE1/CCL19/ITGA4	11	0.428015564202335
BP	GO:0050708	regulation of protein secretion	11/108	257/18903	2.55500009287736e-07	3.58113778200058e-06	1.64090566374012e-06	LEP/IGF1/IL6/PPP3CB/ARF6/TGFB1/VEGFC/CCL5/IRS1/IL1B/TNF	11	0.428015564202335
BP	GO:0031294	lymphocyte costimulation	6/108	47/18903	2.68381828556983e-07	3.7165515618571e-06	1.70295332899105e-06	CCL21/CCR7/PIK3CA/CD24/AKT1/CCL19	6	1.27659574468085
BP	GO:0061383	trabecula morphogenesis	6/108	47/18903	2.68381828556983e-07	3.7165515618571e-06	1.70295332899105e-06	S1PR1/TEK/ADAMTS1/COL1A1/SOS1/SEMA4D	6	1.27659574468085
BP	GO:0140353	lipid export from cell	6/108	47/18903	2.68381828556983e-07	3.7165515618571e-06	1.70295332899105e-06	LEP/PLA2G10/PTGS2/RETN/NKX3-1/IL1B	6	1.27659574468085
BP	GO:0010827	regulation of glucose transmembrane transport	7/108	77/18903	2.82651329470418e-07	3.89856136504616e-06	1.78635166077551e-06	LEP/IGF1/PIK3R1/AKT1/IRS1/IL1B/TNF	7	0.909090909090909
BP	GO:1902903	regulation of supramolecular fiber organization	13/108	384/18903	2.95310355078035e-07	4.05700178285777e-06	1.85895031371178e-06	S1PR1/CXCL12/NRP1/PIK3R1/PROX1/MET/GRB2/CCL21/CCR7/PIK3CA/LPAR1/ARF6/EMILIN1	13	0.338541666666667
BP	GO:0061028	establishment of endothelial barrier	6/108	48/18903	3.05306077463053e-07	4.17774561334818e-06	1.91427609210244e-06	FOXP3/SOX18/VEGFA/HPSE/IL1B/TNF	6	1.25
BP	GO:0043154	negative regulation of cysteine-type endopeptidase activity involved in apoptotic process	7/108	78/18903	3.09069165018192e-07	4.21258838304323e-06	1.93024132483388e-06	MMP9/RPS6KA1/AKT1/HGF/VEGFA/PTGS2/TNF	7	0.897435897435897
BP	GO:1904894	positive regulation of receptor signaling pathway via STAT	6/108	49/18903	3.46300867701044e-07	4.70154354502359e-06	2.15428444840237e-06	GHR/LEP/IL6/TGFB1/CCL5/TNF	6	1.22448979591837
BP	GO:0071887	leukocyte apoptotic process	8/108	117/18903	3.55772764626108e-07	4.81127074662338e-06	2.20456232027773e-06	CXCL12/CDKN2A/IL6/CCL21/CCR7/AKT1/CCL5/CCL19	8	0.683760683760684
BP	GO:0060541	respiratory system development	10/108	211/18903	3.6273067096313e-07	4.88627853258504e-06	2.23893148122645e-06	EPAS1/FGF2/FLT4/KDR/CCBE1/PROX1/VEGFA/RSPO2/SIX1/TNF	10	0.473933649289099
BP	GO:1904707	positive regulation of vascular associated smooth muscle cell proliferation	6/108	50/18903	3.91707172874528e-07	5.25616369182797e-06	2.40841578752311e-06	ADAMTS1/IGF1/FGF2/MMP9/JUN/TNF	6	1.2
BP	GO:0002407	dendritic cell chemotaxis	5/108	27/18903	4.05034359904001e-07	5.41401140535773e-06	2.48074285866828e-06	CCL21/CXCR4/CCR7/CCL5/CCL19	5	1.85185185185185
BP	GO:0018209	peptidyl-serine modification	12/108	332/18903	4.35942170654237e-07	5.80473767232681e-06	2.65977672540865e-06	IL6/NTRK2/IL24/RPS6KA1/PIK3CA/TGFB1/AKT1/HGF/VEGFA/PTGS2/NGF/TNF	12	0.36144578313253
BP	GO:0002551	mast cell chemotaxis	4/108	12/18903	4.81505534280943e-07	6.3868665121863e-06	2.92651276532116e-06	VEGFD/VEGFB/VEGFC/VEGFA	4	3.33333333333333
BP	GO:0002573	myeloid leukocyte differentiation	10/108	218/18903	4.89783205647361e-07	6.38843141609094e-06	2.92722981667094e-06	PIK3R1/MMP9/JUN/EPHA2/CCR7/TGFB1/VEGFA/CCL19/GATA2/TNF	10	0.458715596330275
BP	GO:0043523	regulation of neuron apoptotic process	10/108	218/18903	4.89783205647361e-07	6.38843141609094e-06	2.92722981667094e-06	ITGA1/NRP1/KDR/NTRK2/JUN/PIK3CA/NES/SIX1/NGF/TNF	10	0.458715596330275
BP	GO:1901215	negative regulation of neuron death	10/108	218/18903	4.89783205647361e-07	6.38843141609094e-06	2.92722981667094e-06	GHR/NRP1/KDR/NTRK2/JUN/PIK3CA/AKT1/NES/SIX1/NGF	10	0.458715596330275
BP	GO:0008286	insulin receptor signaling pathway	8/108	122/18903	4.90668660084344e-07	6.38843141609094e-06	2.92722981667094e-06	LEP/PIK3R1/GRB2/IGFBP1/PIK3CA/AKT1/IRS1/IL1B	8	0.655737704918033
BP	GO:0002675	positive regulation of acute inflammatory response	5/108	28/18903	4.90850016372094e-07	6.38843141609094e-06	2.92722981667094e-06	IL6/CCR7/PTGS2/IL1B/TNF	5	1.78571428571429
BP	GO:0021675	nerve development	7/108	84/18903	5.15214555159247e-07	6.68042243431203e-06	3.06102241129503e-06	NRP1/SULF2/LPAR1/SERPINE2/SIX1/ITGA4/NGF	7	0.833333333333333
BP	GO:0071675	regulation of mononuclear cell migration	8/108	123/18903	5.22337419516297e-07	6.74750800882619e-06	3.09176155228224e-06	CXCL12/CCL21/CCR7/AKT1/SERPINE1/CCL5/ITGA4/TNF	8	0.650406504065041
BP	GO:0001837	epithelial to mesenchymal transition	9/108	169/18903	5.4056989826285e-07	6.95707430403712e-06	3.1877864867232e-06	COL1A1/IGF1/IL6/TGFB1/HGF/TWIST1/TIAM1/LOXL2/IL1B	9	0.532544378698225
BP	GO:0032970	regulation of actin filament-based process	13/108	406/18903	5.55385536817416e-07	7.09950702986594e-06	3.25305028854875e-06	S1PR1/TEK/CXCL12/NRP1/PIK3R1/PROX1/MET/GRB2/CCL21/CCR7/PIK3CA/LPAR1/ARF6	13	0.320197044334975
BP	GO:0072676	lymphocyte migration	8/108	124/18903	5.55738418571251e-07	7.09950702986594e-06	3.25305028854875e-06	S1PR1/CXCL12/CCL21/CCR7/AKT1/CCL5/CCL19/ITGA4	8	0.645161290322581
BP	GO:0110053	regulation of actin filament organization	11/108	278/18903	5.58042726991853e-07	7.10273500310954e-06	3.25452937142695e-06	S1PR1/CXCL12/NRP1/PIK3R1/MET/GRB2/CCL21/CCR7/PIK3CA/LPAR1/ARF6	11	0.39568345323741
BP	GO:0010811	positive regulation of cell-substrate adhesion	8/108	125/18903	5.90949263021106e-07	7.49401592886106e-06	3.43381738720959e-06	FN1/TEK/NRP1/KDR/CCL21/CCR7/VEGFA/EMILIN1	8	0.64
BP	GO:1903034	regulation of response to wounding	9/108	172/18903	6.26818023536579e-07	7.90658171390517e-06	3.6228582939144e-06	FGF2/CD9/CXCR4/ITGB1/SERPINE1/SERPINE2/HPSE/EMILIN1/TNF	9	0.523255813953488
BP	GO:0038127	ERBB signaling pathway	8/108	126/18903	6.28050251682242e-07	7.90658171390517e-06	3.6228582939144e-06	ITGA1/MMP9/SOS1/GRB2/ERBB2/PIK3CA/TGFB1/AKT1	8	0.634920634920635
BP	GO:0097048	dendritic cell apoptotic process	4/108	13/18903	6.92449577092265e-07	8.65436980466939e-06	3.96550071319796e-06	CXCL12/CCL21/CCR7/CCL19	4	3.07692307692308
BP	GO:2000668	regulation of dendritic cell apoptotic process	4/108	13/18903	6.92449577092265e-07	8.65436980466939e-06	3.96550071319796e-06	CXCL12/CCL21/CCR7/CCL19	4	3.07692307692308
BP	GO:2000179	positive regulation of neural precursor cell proliferation	6/108	55/18903	6.98259090677835e-07	8.69558622995203e-06	3.98438640534456e-06	FGF2/PROX1/ITGB1/VEGFC/NES/VEGFA	6	1.09090909090909
BP	GO:0071229	cellular response to acid chemical	7/108	89/18903	7.65652847738513e-07	9.50068157301337e-06	4.35328746101467e-06	COL1A1/NTRK2/COL1A2/PIK3CA/VEGFA/SIX1/TNF	7	0.786516853932584
BP	GO:0001954	positive regulation of cell-matrix adhesion	6/108	56/18903	7.78441370300732e-07	9.62487151421834e-06	4.41019227459851e-06	TEK/NRP1/KDR/CCL21/CCR7/VEGFA	6	1.07142857142857
BP	GO:0032874	positive regulation of stress-activated MAPK cascade	8/108	130/18903	7.97059532963174e-07	9.82000036696978e-06	4.49960185868329e-06	LEP/FLT4/CCL21/CCR7/VEGFA/CCL19/IL1B/TNF	8	0.615384615384615
BP	GO:0010586	miRNA metabolic process	7/108	90/18903	8.26352852343493e-07	1.01089525611773e-05	4.63200204010282e-06	EGR1/SMARCA4/FGF2/JUN/TGFB1/GATA2/TNF	7	0.777777777777778
BP	GO:2000177	regulation of neural precursor cell proliferation	7/108	90/18903	8.26352852343493e-07	1.01089525611773e-05	4.63200204010282e-06	FGF2/PROX1/ITGB1/VEGFC/NES/VEGFA/GATA2	7	0.777777777777778
BP	GO:0001659	temperature homeostasis	9/108	178/18903	8.35645621437732e-07	1.01687754002272e-05	4.65941333824146e-06	EPAS1/LEP/EGR1/CXCR4/VEGFA/PTGS2/IL1B/LCN2/TNF	9	0.50561797752809
BP	GO:0035767	endothelial cell chemotaxis	5/108	31/18903	8.37117558944177e-07	1.01687754002272e-05	4.65941333824146e-06	FGF2/NRP1/KDR/MET/VEGFA	5	1.61290322580645
BP	GO:0048771	tissue remodeling	9/108	179/18903	8.75738781344054e-07	1.06007260874584e-05	4.85733656049131e-06	EPAS1/LEP/S1PR1/ACVRL1/FLT4/TIE1/IL6/EPHA2/TGFB1	9	0.502793296089385
BP	GO:2000117	negative regulation of cysteine-type endopeptidase activity	7/108	91/18903	8.91039418974943e-07	1.07483570330706e-05	4.92498222774707e-06	MMP9/RPS6KA1/AKT1/HGF/VEGFA/PTGS2/TNF	7	0.769230769230769
BP	GO:0070304	positive regulation of stress-activated protein kinase signaling cascade	8/108	132/18903	8.9520176608344e-07	1.07610712297947e-05	4.93080797327392e-06	LEP/FLT4/CCL21/CCR7/VEGFA/CCL19/IL1B/TNF	8	0.606060606060606
BP	GO:0035265	organ growth	9/108	180/18903	9.17485741333697e-07	1.09907807491255e-05	5.0360626923689e-06	LEP/S1PR1/IGF1/FGF2/FGFR3/PROX1/AKT1/MAPK11/RSPO2	9	0.5
BP	GO:0007435	salivary gland morphogenesis	5/108	32/18903	9.87643283975953e-07	1.1790417410775e-05	5.40246253702999e-06	NRP1/TGFB1/HGF/NKX3-1/TNF	5	1.5625
BP	GO:0007411	axon guidance	10/108	236/18903	1.01065109150364e-06	1.2023622263868e-05	5.50931884570803e-06	CXCL12/NRP1/SEMA7A/SOS1/EPHA2/PLA2G10/ERBB2/LAMC2/SEMA4D/VEGFA	10	0.423728813559322
BP	GO:0030516	regulation of axon extension	7/108	93/18903	1.03321115442048e-06	1.2223537559193e-05	5.60092161564775e-06	FN1/CXCL12/NRP1/SEMA7A/SEMA4D/VEGFA/CDH1	7	0.752688172043011
BP	GO:0048872	homeostasis of number of cells	11/108	296/18903	1.03451661029566e-06	1.2223537559193e-05	5.60092161564775e-06	EPAS1/FOXP3/IL6/SOS1/PPP3CB/PLA2G10/CCR7/AKT1/VEGFA/PLA2G2A/GATA2	11	0.371621621621622
BP	GO:0097485	neuron projection guidance	10/108	237/18903	1.05019168171275e-06	1.23602358632507e-05	5.66355786005009e-06	CXCL12/NRP1/SEMA7A/SOS1/EPHA2/PLA2G10/ERBB2/LAMC2/SEMA4D/VEGFA	10	0.421940928270042
BP	GO:0097696	receptor signaling pathway via STAT	9/108	183/18903	1.05322633727873e-06	1.23602358632507e-05	5.66355786005009e-06	GHR/LEP/IGF1/IL6/FGFR3/IL24/TGFB1/CCL5/TNF	9	0.491803278688525
BP	GO:0046324	regulation of glucose import	6/108	59/18903	1.06538338087653e-06	1.24187113286012e-05	5.6903517809e-06	LEP/IGF1/PIK3R1/AKT1/IRS1/TNF	6	1.01694915254237
BP	GO:1903078	positive regulation of protein localization to plasma membrane	6/108	59/18903	1.06538338087653e-06	1.24187113286012e-05	5.6903517809e-06	PIK3R1/EPHA2/ITGB1/ARF6/AKT1/TNF	6	1.01694915254237
BP	GO:0010565	regulation of cellular ketone metabolic process	8/108	136/18903	1.12274140748716e-06	1.30433917876528e-05	5.97658530937177e-06	EGR1/PROX1/ADM/AKT1/TWIST1/PTGS2/IRS1/IL1B	8	0.588235294117647
BP	GO:0050670	regulation of lymphocyte proliferation	10/108	239/18903	1.13334666028499e-06	1.30788204596887e-05	5.99281900719113e-06	LEP/FOXP3/IGF1/IL6/SOS1/ERBB2/CD24/CCL5/CCL19/IL1B	10	0.418410041841004
BP	GO:0051403	stress-activated MAPK cascade	10/108	239/18903	1.13334666028499e-06	1.30788204596887e-05	5.99281900719113e-06	LEP/FLT4/CCL21/CCR7/HGF/VEGFA/MAPK11/CCL19/IL1B/TNF	10	0.418410041841004
BP	GO:0048841	regulation of axon extension involved in axon guidance	5/108	33/18903	1.1587337285672e-06	1.33273626853809e-05	6.10670302133512e-06	CXCL12/NRP1/SEMA7A/SEMA4D/VEGFA	5	1.51515151515152
BP	GO:2000351	regulation of endothelial cell apoptotic process	6/108	60/18903	1.17829801780483e-06	1.35075090650342e-05	6.18924751771309e-06	TEK/KDR/SERPINE1/ITGA4/GATA2/TNF	6	1
BP	GO:1904019	epithelial cell apoptotic process	8/108	137/18903	1.18677032861756e-06	1.35597322695511e-05	6.21317660318451e-06	TEK/IL6/KDR/ARF6/SERPINE1/ITGA4/GATA2/TNF	8	0.583941605839416
BP	GO:0007044	cell-substrate junction assembly	7/108	95/18903	1.19392671327396e-06	1.35966259255081e-05	6.23008156822667e-06	FN1/TEK/NRP1/ACVRL1/KDR/ITGA6/VEGFA	7	0.736842105263158
BP	GO:0043588	skin development	11/108	302/18903	1.25866922806291e-06	1.42666234078158e-05	6.5370797152782e-06	COL1A1/CYP26B1/COL1A2/SOS1/EPHA2/MET/PLA2G10/SOX18/ITGA6/HPSE/TNF	11	0.364238410596026
BP	GO:0030324	lung development	9/108	187/18903	1.26100137573416e-06	1.42666234078158e-05	6.5370797152782e-06	EPAS1/FGF2/FLT4/KDR/CCBE1/PROX1/VEGFA/RSPO2/TNF	9	0.481283422459893
BP	GO:0030336	negative regulation of cell migration	12/108	368/18903	1.29013636785637e-06	1.45487039267712e-05	6.66633124073222e-06	CXCL12/FGF2/ACVRL1/TIE1/IL24/CCL21/TGFB1/AKT1/SERPINE1/EMILIN1/CDH1/TNF	12	0.326086956521739
BP	GO:0001768	establishment of T cell polarity	4/108	15/18903	1.31035098208603e-06	1.46265305219939e-05	6.70199200238522e-06	CYP26B1/CCL21/CCR7/CCL19	4	2.66666666666667
BP	GO:0097531	mast cell migration	4/108	15/18903	1.31035098208603e-06	1.46265305219939e-05	6.70199200238522e-06	VEGFD/VEGFB/VEGFC/VEGFA	4	2.66666666666667
BP	GO:2001028	positive regulation of endothelial cell chemotaxis	4/108	15/18903	1.31035098208603e-06	1.46265305219939e-05	6.70199200238522e-06	FGF2/KDR/MET/VEGFA	4	2.66666666666667
BP	GO:0032944	regulation of mononuclear cell proliferation	10/108	243/18903	1.31706826596446e-06	1.46265305219939e-05	6.70199200238522e-06	LEP/FOXP3/IGF1/IL6/SOS1/ERBB2/CD24/CCL5/CCL19/IL1B	10	0.411522633744856
BP	GO:0030308	negative regulation of cell growth	9/108	188/18903	1.31816219608957e-06	1.46265305219939e-05	6.70199200238522e-06	SMARCA4/CDKN2A/NRP1/ACVRL1/SEMA7A/TGFB1/SEMA4D/SERPINE2/CDH1	9	0.478723404255319
BP	GO:0007431	salivary gland development	5/108	34/18903	1.35236016412493e-06	1.49104168414029e-05	6.83207095989364e-06	NRP1/TGFB1/HGF/NKX3-1/TNF	5	1.47058823529412
BP	GO:0036336	dendritic cell migration	5/108	34/18903	1.35236016412493e-06	1.49104168414029e-05	6.83207095989364e-06	CCL21/CXCR4/CCR7/CCL5/CCL19	5	1.47058823529412
BP	GO:0046651	lymphocyte proliferation	11/108	305/18903	1.38599625742565e-06	1.52327588673258e-05	6.97977062636746e-06	LEP/FOXP3/IGF1/IL6/SOS1/PPP3CB/ERBB2/CD24/CCL5/CCL19/IL1B	11	0.360655737704918
BP	GO:0001818	negative regulation of cytokine production	12/108	371/18903	1.40419743992581e-06	1.53839605601999e-05	7.04905243826847e-06	FN1/FOXP3/IGF1/IL6/EPHA2/PLA2G10/CCR7/TGFB1/CD24/HGF/TWIST1/TNF	12	0.32345013477089
BP	GO:0046824	positive regulation of nucleocytoplasmic transport	6/108	62/18903	1.43353985902919e-06	1.56558832553914e-05	7.17364956851068e-06	LEP/PIK3R1/TGFB1/PTGS2/IL1B/CDH1	6	0.967741935483871
BP	GO:0051098	regulation of binding	12/108	372/18903	1.44415557379717e-06	1.57222220015277e-05	7.20404650682666e-06	IGF1/NRP1/MMP9/JUN/MET/TGFB1/AKT1/TWIST1/NES/TIAM1/ITGA4/NGF	12	0.32258064516129
BP	GO:0031098	stress-activated protein kinase signaling cascade	10/108	246/18903	1.47142473849999e-06	1.59688791369497e-05	7.31706675769503e-06	LEP/FLT4/CCL21/CCR7/HGF/VEGFA/MAPK11/CCL19/IL1B/TNF	10	0.40650406504065
BP	GO:1901653	cellular response to peptide	12/108	373/18903	1.48511795750453e-06	1.60671199027521e-05	7.36208145381356e-06	GHR/LEP/IGF1/PIK3R1/GRB2/IGFBP1/PIK3CA/AKT1/IRS1/ITGA4/IL1B/TNF	12	0.32171581769437
BP	GO:0030323	respiratory tube development	9/108	191/18903	1.50328275684747e-06	1.62129747794578e-05	7.4289133122451e-06	EPAS1/FGF2/FLT4/KDR/CCBE1/PROX1/VEGFA/RSPO2/TNF	9	0.471204188481675
BP	GO:2001233	regulation of apoptotic signaling pathway	12/108	374/18903	1.52710638851091e-06	1.64187649597043e-05	7.52320800093476e-06	CXCL12/IGF1/NRP1/MMP9/AKT1/HGF/ITGA6/SERPINE1/PTGS2/NKX3-1/IL1B/TNF	12	0.320855614973262
BP	GO:0031099	regeneration	9/108	192/18903	1.56978203510364e-06	1.68253418127826e-05	7.70950473163168e-06	CXCL12/IGF1/IL6/JUN/CD9/IGFBP1/ADM/HGF/TNF	9	0.46875
BP	GO:0032943	mononuclear cell proliferation	11/108	312/18903	1.7281056274457e-06	1.8465128648818e-05	8.46086803301063e-06	LEP/FOXP3/IGF1/IL6/SOS1/PPP3CB/ERBB2/CD24/CCL5/CCL19/IL1B	11	0.352564102564103
BP	GO:0001767	establishment of lymphocyte polarity	4/108	16/18903	1.7394550971133e-06	1.84723728411234e-05	8.46418737923713e-06	CYP26B1/CCL21/CCR7/CCL19	4	2.5
BP	GO:0060841	venous blood vessel development	4/108	16/18903	1.7394550971133e-06	1.84723728411234e-05	8.46418737923713e-06	ACVRL1/CCBE1/PROX1/VEGFA	4	2.5
BP	GO:0032872	regulation of stress-activated MAPK cascade	9/108	195/18903	1.78474522787223e-06	1.88953760822436e-05	8.65801081089153e-06	LEP/FLT4/CCL21/CCR7/HGF/VEGFA/CCL19/IL1B/TNF	9	0.461538461538462
BP	GO:1905477	positive regulation of protein localization to membrane	7/108	101/18903	1.80696432863996e-06	1.90722881272913e-05	8.73907330956488e-06	PIK3R1/EPHA2/ERBB2/ITGB1/ARF6/AKT1/TNF	7	0.693069306930693
BP	GO:0010951	negative regulation of endopeptidase activity	10/108	252/18903	1.82811019818553e-06	1.92368313255876e-05	8.81446830480115e-06	MMP9/RPS6KA1/AKT1/HGF/VEGFA/SERPINE1/SERPINE2/PTGS2/NGF/TNF	10	0.396825396825397
BP	GO:0050671	positive regulation of lymphocyte proliferation	8/108	146/18903	1.9173642233769e-06	2.00541236898212e-05	9.18895813206865e-06	LEP/FOXP3/IGF1/IL6/CD24/CCL5/CCL19/IL1B	8	0.547945205479452
BP	GO:0050768	negative regulation of neurogenesis	8/108	146/18903	1.9173642233769e-06	2.00541236898212e-05	9.18895813206865e-06	NRP1/IL6/SEMA7A/PROX1/SEMA4D/IL1B/CDH1/TNF	8	0.547945205479452
BP	GO:0051090	regulation of DNA-binding transcription factor activity	13/108	454/18903	1.93204617183662e-06	2.01468188159589e-05	9.23143177221871e-06	FOXP3/SMARCA4/CDKN2A/IL6/PROX1/PLA2G10/ZIC2/AKT1/TWIST1/VEGFA/NKX3-1/IL1B/TNF	13	0.286343612334802
BP	GO:2000146	negative regulation of cell motility	12/108	383/18903	1.95497088581824e-06	2.03246522723806e-05	9.31291646887336e-06	CXCL12/FGF2/ACVRL1/TIE1/IL24/CCL21/TGFB1/AKT1/SERPINE1/EMILIN1/CDH1/TNF	12	0.31331592689295
BP	GO:0045598	regulation of fat cell differentiation	8/108	147/18903	2.018197361384e-06	2.09191594763815e-05	9.58532437316636e-06	LEP/IL6/TGFB1/AKT1/PTGS2/SIX1/GATA2/TNF	8	0.54421768707483
BP	GO:0070302	regulation of stress-activated protein kinase signaling cascade	9/108	198/18903	2.02464241676769e-06	2.09233195428351e-05	9.58723054852761e-06	LEP/FLT4/CCL21/CCR7/HGF/VEGFA/CCL19/IL1B/TNF	9	0.454545454545455
BP	GO:0051402	neuron apoptotic process	10/108	255/18903	2.03314829963819e-06	2.09486887302006e-05	9.59885491088579e-06	ITGA1/NRP1/KDR/NTRK2/JUN/PIK3CA/NES/SIX1/NGF/TNF	10	0.392156862745098
BP	GO:1903076	regulation of protein localization to plasma membrane	7/108	103/18903	2.06220728631619e-06	2.11850493330167e-05	9.70715720905354e-06	PIK3R1/EPHA2/ITGB1/ARF6/TGFB1/AKT1/TNF	7	0.679611650485437
BP	GO:0072577	endothelial cell apoptotic process	6/108	66/18903	2.07993843591591e-06	2.12796423653675e-05	9.75050048484564e-06	TEK/KDR/SERPINE1/ITGA4/GATA2/TNF	6	0.909090909090909
BP	GO:0048846	axon extension involved in axon guidance	5/108	37/18903	2.08985511387203e-06	2.12796423653675e-05	9.75050048484564e-06	CXCL12/NRP1/SEMA7A/SEMA4D/VEGFA	5	1.35135135135135
BP	GO:1902284	neuron projection extension involved in neuron projection guidance	5/108	37/18903	2.08985511387203e-06	2.12796423653675e-05	9.75050048484564e-06	CXCL12/NRP1/SEMA7A/SEMA4D/VEGFA	5	1.35135135135135
BP	GO:0032946	positive regulation of mononuclear cell proliferation	8/108	149/18903	2.23345677134152e-06	2.26751534967283e-05	1.03899347257653e-05	LEP/FOXP3/IGF1/IL6/CD24/CCL5/CCL19/IL1B	8	0.536912751677852
BP	GO:1904377	positive regulation of protein localization to cell periphery	6/108	67/18903	2.27398704006214e-06	2.30191319669449e-05	1.05475483821904e-05	PIK3R1/EPHA2/ITGB1/ARF6/AKT1/TNF	6	0.895522388059701
BP	GO:0050878	regulation of body fluid levels	12/108	390/18903	2.35784735305746e-06	2.37984476276528e-05	1.09046369834513e-05	FN1/CYP26B1/IL6/CD9/MET/PIK3CA/ADM/VEGFA/SERPINE1/SERPINE2/HPSE/EMILIN1	12	0.307692307692308
BP	GO:0045773	positive regulation of axon extension	5/108	38/18903	2.39560022551581e-06	2.41092092463248e-05	1.10470304157048e-05	FN1/CXCL12/NRP1/SEMA7A/VEGFA	5	1.31578947368421
BP	GO:0051961	negative regulation of nervous system development	8/108	151/18903	2.46794013090311e-06	2.47652427048886e-05	1.1347630136601e-05	NRP1/IL6/SEMA7A/PROX1/SEMA4D/IL1B/CDH1/TNF	8	0.529801324503311
BP	GO:0030593	neutrophil chemotaxis	7/108	106/18903	2.50114357289019e-06	2.49537724765009e-05	1.14340159694995e-05	ITGA1/ITGA9/CCL21/CCR7/CCL5/CCL19/IL1B	7	0.660377358490566
BP	GO:1901890	positive regulation of cell junction assembly	7/108	106/18903	2.50114357289019e-06	2.49537724765009e-05	1.14340159694995e-05	TEK/NRP1/KDR/NTRK2/EPHA2/SEMA4D/VEGFA	7	0.660377358490566
BP	GO:0062013	positive regulation of small molecule metabolic process	8/108	152/18903	2.59282018820211e-06	2.57940904929761e-05	1.18190563327906e-05	IGF1/ADM/AKT1/TWIST1/PTGS2/IRS1/IL1B/TNF	8	0.526315789473684
BP	GO:0010717	regulation of epithelial to mesenchymal transition	7/108	107/18903	2.66374601119455e-06	2.62731871531496e-05	1.2038582212836e-05	COL1A1/IL6/TGFB1/TWIST1/TIAM1/LOXL2/IL1B	7	0.654205607476635
BP	GO:0014013	regulation of gliogenesis	7/108	107/18903	2.66374601119455e-06	2.62731871531496e-05	1.2038582212836e-05	IL6/CXCR4/TGFB1/VEGFC/SERPINE2/IL1B/TNF	7	0.654205607476635
BP	GO:0060840	artery development	7/108	107/18903	2.66374601119455e-06	2.62731871531496e-05	1.2038582212836e-05	LEP/NRP1/ACVRL1/PROX1/VEGFA/SIX1/NKX3-1	7	0.654205607476635
BP	GO:0010466	negative regulation of peptidase activity	10/108	263/18903	2.68085402239877e-06	2.6366808595297e-05	1.20814802983102e-05	MMP9/RPS6KA1/AKT1/HGF/VEGFA/SERPINE1/SERPINE2/PTGS2/NGF/TNF	10	0.380228136882129
BP	GO:1901654	response to ketone	9/108	205/18903	2.69501982937876e-06	2.64310443323208e-05	1.2110913621213e-05	FOXP3/POSTN/CCL21/CCR7/PIK3CA/TGFB1/AKT1/CCL19/NKX3-1	9	0.439024390243902
BP	GO:0023061	signal release	13/108	470/18903	2.82691029883718e-06	2.76462244479501e-05	1.26677187640429e-05	LEP/CXCL12/IL6/PPP3CB/PLA2G10/ADM/PTGS2/CCL5/IRS1/RETN/NKX3-1/IL1B/TNF	13	0.276595744680851
BP	GO:0014812	muscle cell migration	7/108	108/18903	2.83508235329529e-06	2.76480425552347e-05	1.26685518351846e-05	ADAMTS1/IGF1/NRP1/LPAR1/SERPINE1/CCL5/SIX1	7	0.648148148148148
BP	GO:0043524	negative regulation of neuron apoptotic process	8/108	154/18903	2.858756623987e-06	2.78006051467499e-05	1.27384572216097e-05	NRP1/KDR/NTRK2/JUN/PIK3CA/NES/SIX1/NGF	8	0.51948051948052
BP	GO:0032310	prostaglandin secretion	4/108	18/18903	2.89893031884509e-06	2.81123158651028e-05	1.28812855388458e-05	LEP/PLA2G10/PTGS2/IL1B	4	2.22222222222222
BP	GO:2001236	regulation of extrinsic apoptotic signaling pathway	8/108	155/18903	3.00018720593607e-06	2.90129835389684e-05	1.3293978592607e-05	IGF1/NRP1/AKT1/HGF/ITGA6/SERPINE1/IL1B/TNF	8	0.516129032258065
BP	GO:0046822	regulation of nucleocytoplasmic transport	7/108	109/18903	3.01552242160561e-06	2.90800518763193e-05	1.33247098353897e-05	LEP/PTPN14/PIK3R1/TGFB1/PTGS2/IL1B/CDH1	7	0.642201834862385
BP	GO:0032869	cellular response to insulin stimulus	9/108	208/18903	3.03616088139728e-06	2.91977471427705e-05	1.3378638737619e-05	GHR/LEP/PIK3R1/GRB2/IGFBP1/PIK3CA/AKT1/IRS1/IL1B	9	0.432692307692308
BP	GO:0042307	positive regulation of protein import into nucleus	5/108	40/18903	3.11207128863422e-06	2.96804154304454e-05	1.35998011656424e-05	LEP/PIK3R1/TGFB1/PTGS2/CDH1	5	1.25
BP	GO:1902692	regulation of neuroblast proliferation	5/108	40/18903	3.11207128863422e-06	2.96804154304454e-05	1.35998011656424e-05	FGF2/PROX1/ITGB1/VEGFC/VEGFA	5	1.25
BP	GO:1904994	regulation of leukocyte adhesion to vascular endothelial cell	5/108	40/18903	3.11207128863422e-06	2.96804154304454e-05	1.35998011656424e-05	CXCL12/IL6/CCL21/ITGA4/TNF	5	1.25
BP	GO:1904035	regulation of epithelial cell apoptotic process	7/108	110/18903	3.20544737982134e-06	3.04869748047843e-05	1.39693730520265e-05	TEK/IL6/KDR/SERPINE1/ITGA4/GATA2/TNF	7	0.636363636363636
BP	GO:0070663	regulation of leukocyte proliferation	10/108	269/18903	3.27797322420993e-06	3.10913515129172e-05	1.4246303241195e-05	LEP/FOXP3/IGF1/IL6/SOS1/ERBB2/CD24/CCL5/CCL19/IL1B	10	0.371747211895911
BP	GO:0090596	sensory organ morphogenesis	10/108	272/18903	3.61765114766333e-06	3.4219421511504e-05	1.56796096621474e-05	FGF2/CYP26B1/KDR/NTRK2/PROX1/EPHA2/TWIST1/VEGFA/SIX1/GATA2	10	0.367647058823529
BP	GO:0030099	myeloid cell differentiation	12/108	407/18903	3.65648004149309e-06	3.44924629527223e-05	1.580471941067e-05	EPAS1/PIK3R1/MMP9/JUN/EPHA2/PLA2G10/CCR7/TGFB1/VEGFA/CCL19/GATA2/TNF	12	0.294840294840295
BP	GO:0090287	regulation of cellular response to growth factor stimulus	11/108	338/18903	3.73689147419215e-06	3.51552127273186e-05	1.61083966007082e-05	FGF2/NRP1/ACVRL1/KDR/CCBE1/SULF2/TGFB1/VEGFC/ADAMTS3/EMILIN1/IL1B	11	0.325443786982249
BP	GO:1904659	glucose transmembrane transport	7/108	113/18903	3.83611765511948e-06	3.58759202249739e-05	1.64386304779822e-05	LEP/IGF1/PIK3R1/AKT1/IRS1/IL1B/TNF	7	0.619469026548673
BP	GO:0062012	regulation of small molecule metabolic process	11/108	339/18903	3.84396938373954e-06	3.58759202249739e-05	1.64386304779822e-05	LEP/EGR1/IGF1/PROX1/ADM/AKT1/TWIST1/PTGS2/IRS1/IL1B/TNF	11	0.324483775811209
BP	GO:0042692	muscle cell differentiation	12/108	409/18903	3.84458879360639e-06	3.58759202249739e-05	1.64386304779822e-05	IGF1/CYP26B1/PROX1/CD9/PPP3CB/ITGB1/TGFB1/ADM/AKT1/VEGFA/MAPK11/SIX1	12	0.293398533007335
BP	GO:0044344	cellular response to fibroblast growth factor stimulus	7/108	114/18903	4.06802781397137e-06	3.7858904010669e-05	1.73472493368841e-05	COL1A1/FGF2/FGFR3/SOS1/GRB2/SULF2/CCL5	7	0.614035087719298
BP	GO:0051235	maintenance of location	11/108	342/18903	4.18150052552435e-06	3.88106027328829e-05	1.77833252207287e-05	LEP/FGF2/IL6/PLA2G10/CCL21/CCR7/AKT1/CCL19/IL1B/LCN2/TNF	11	0.321637426900585
BP	GO:1904892	regulation of receptor signaling pathway via STAT	7/108	115/18903	4.31150598359739e-06	3.99102505754389e-05	1.82871925620075e-05	GHR/LEP/IL6/IL24/TGFB1/CCL5/TNF	7	0.608695652173913
BP	GO:0032890	regulation of organic acid transport	6/108	75/18903	4.42173650147281e-06	4.07129036385608e-05	1.86549745456873e-05	LEP/PLA2G10/ITGB1/AKT1/IL1B/TNF	6	0.8
BP	GO:0046323	glucose import	6/108	75/18903	4.42173650147281e-06	4.07129036385608e-05	1.86549745456873e-05	LEP/IGF1/PIK3R1/AKT1/IRS1/TNF	6	0.8
BP	GO:0015732	prostaglandin transport	4/108	20/18903	4.54973126383655e-06	4.17176087002155e-05	1.91153383536212e-05	LEP/PLA2G10/PTGS2/IL1B	4	2
BP	GO:0030856	regulation of epithelial cell differentiation	8/108	164/18903	4.56356317063831e-06	4.17176087002155e-05	1.91153383536212e-05	FGF2/ACVRL1/MMP9/CD24/VEGFA/SERPINE1/IL1B/TNF	8	0.48780487804878
BP	GO:0008645	hexose transmembrane transport	7/108	116/18903	4.56700568959609e-06	4.17176087002155e-05	1.91153383536212e-05	LEP/IGF1/PIK3R1/AKT1/IRS1/IL1B/TNF	7	0.603448275862069
BP	GO:0007517	muscle organ development	11/108	348/18903	4.93522390504933e-06	4.48444754836766e-05	2.05480934518838e-05	S1PR1/EGR1/IGF1/CYP26B1/PROX1/PPP3CB/ITGB1/TGFB1/TWIST1/HOXD10/SIX1	11	0.316091954022989
BP	GO:0070661	leukocyte proliferation	11/108	348/18903	4.93522390504933e-06	4.48444754836766e-05	2.05480934518838e-05	LEP/FOXP3/IGF1/IL6/SOS1/PPP3CB/ERBB2/CD24/CCL5/CCL19/IL1B	11	0.316091954022989
BP	GO:0014911	positive regulation of smooth muscle cell migration	5/108	44/18903	5.04392524304892e-06	4.55928699515283e-05	2.08910137179462e-05	ADAMTS1/IGF1/NRP1/LPAR1/CCL5	5	1.13636363636364
BP	GO:0071526	semaphorin-plexin signaling pathway	5/108	44/18903	5.04392524304892e-06	4.55928699515283e-05	2.08910137179462e-05	NRP1/KDR/SEMA7A/MET/SEMA4D	5	1.13636363636364
BP	GO:0002718	regulation of cytokine production involved in immune response	7/108	118/18903	5.11594792864278e-06	4.61234680441701e-05	2.11341379618001e-05	FOXP3/IL6/SEMA7A/TGFB1/TWIST1/IL1B/TNF	7	0.593220338983051
BP	GO:0070665	positive regulation of leukocyte proliferation	8/108	167/18903	5.21831775243141e-06	4.692419755563e-05	2.15010385588903e-05	LEP/FOXP3/IGF1/IL6/CD24/CCL5/CCL19/IL1B	8	0.479041916167665
BP	GO:0015749	monosaccharide transmembrane transport	7/108	119/18903	5.41036224805737e-06	4.85250624424213e-05	2.22345675151962e-05	LEP/IGF1/PIK3R1/AKT1/IRS1/IL1B/TNF	7	0.588235294117647
BP	GO:0090049	regulation of cell migration involved in sprouting angiogenesis	6/108	78/18903	5.56267879439301e-06	4.97622583622445e-05	2.2801460473685e-05	FGF2/NRP1/KDR/VEGFA/PTGS2/GATA2	6	0.769230769230769
BP	GO:0060252	positive regulation of glial cell proliferation	4/108	21/18903	5.59557006797611e-06	4.99274834415806e-05	2.28771679122083e-05	IL6/VEGFC/IL1B/TNF	4	1.9047619047619
BP	GO:0043620	regulation of DNA-templated transcription in response to stress	5/108	45/18903	5.64873141589481e-06	5.0143354261097e-05	2.29760816295641e-05	EPAS1/EGR1/JUN/RPS6KA1/VEGFA	5	1.11111111111111
BP	GO:0046427	positive regulation of receptor signaling pathway via JAK-STAT	5/108	45/18903	5.64873141589481e-06	5.0143354261097e-05	2.29760816295641e-05	GHR/LEP/IL6/CCL5/TNF	5	1.11111111111111
BP	GO:0002367	cytokine production involved in immune response	7/108	120/18903	5.71874208969679e-06	5.05058293738017e-05	2.31421705939126e-05	FOXP3/IL6/SEMA7A/TGFB1/TWIST1/IL1B/TNF	7	0.583333333333333
BP	GO:0071774	response to fibroblast growth factor	7/108	120/18903	5.71874208969679e-06	5.05058293738017e-05	2.31421705939126e-05	COL1A1/FGF2/FGFR3/SOS1/GRB2/SULF2/CCL5	7	0.583333333333333
BP	GO:0035272	exocrine system development	5/108	46/18903	6.30891741410947e-06	5.55762648540636e-05	2.54654842455148e-05	NRP1/TGFB1/HGF/NKX3-1/TNF	5	1.08695652173913
BP	GO:0003151	outflow tract morphogenesis	6/108	80/18903	6.44814004554348e-06	5.66585300448516e-05	2.59613867182314e-05	NRP1/JUN/TWIST1/SOX18/VEGFA/SIX1	6	0.75
BP	GO:0007259	receptor signaling pathway via JAK-STAT	8/108	172/18903	6.48626788307934e-06	5.67057055838906e-05	2.59830029234465e-05	GHR/LEP/IGF1/IL6/FGFR3/IL24/CCL5/TNF	8	0.465116279069767
BP	GO:1905475	regulation of protein localization to membrane	8/108	172/18903	6.48626788307934e-06	5.67057055838906e-05	2.59830029234465e-05	PIK3R1/EPHA2/ERBB2/ITGB1/ARF6/TGFB1/AKT1/TNF	8	0.465116279069767
BP	GO:0046879	hormone secretion	10/108	291/18903	6.56778914554795e-06	5.72737683170957e-05	2.62432937620065e-05	LEP/IL6/PPP3CB/ADM/CCL5/IRS1/RETN/NKX3-1/IL1B/TNF	10	0.343642611683849
BP	GO:0009306	protein secretion	11/108	359/18903	6.62975138995754e-06	5.76688424925453e-05	2.64243198748109e-05	LEP/IGF1/IL6/PPP3CB/ARF6/TGFB1/VEGFC/CCL5/IRS1/IL1B/TNF	11	0.306406685236769
BP	GO:0035592	establishment of protein localization to extracellular region	11/108	360/18903	6.80640282542346e-06	5.87848887430128e-05	2.69357010963302e-05	LEP/IGF1/IL6/PPP3CB/ARF6/TGFB1/VEGFC/CCL5/IRS1/IL1B/TNF	11	0.305555555555556
BP	GO:0072574	hepatocyte proliferation	4/108	22/18903	6.8089949121745e-06	5.87848887430128e-05	2.69357010963302e-05	IL6/PROX1/RPS6KA1/TNF	4	1.81818181818182
BP	GO:0072575	epithelial cell proliferation involved in liver morphogenesis	4/108	22/18903	6.8089949121745e-06	5.87848887430128e-05	2.69357010963302e-05	IL6/PROX1/RPS6KA1/TNF	4	1.81818181818182
BP	GO:0051146	striated muscle cell differentiation	10/108	293/18903	6.97467322289946e-06	6.00654693972087e-05	2.75224732833451e-05	IGF1/CYP26B1/PROX1/CD9/PPP3CB/ITGB1/TGFB1/AKT1/VEGFA/SIX1	10	0.341296928327645
BP	GO:0071453	cellular response to oxygen levels	8/108	175/18903	7.36533720822467e-06	6.32724501609772e-05	2.8991937241203e-05	EPAS1/EGR1/LPAR1/AKT1/TWIST1/VEGFA/PTGS2/NKX3-1	8	0.457142857142857
BP	GO:1904375	regulation of protein localization to cell periphery	7/108	125/18903	7.4887944618211e-06	6.41737782842194e-05	2.94049329180938e-05	PIK3R1/EPHA2/ITGB1/ARF6/TGFB1/AKT1/TNF	7	0.56
BP	GO:1902905	positive regulation of supramolecular fiber organization	8/108	176/18903	7.67986751994088e-06	6.56486453186057e-05	3.00807286616008e-05	NRP1/PROX1/MET/GRB2/CCL21/CCR7/LPAR1/ARF6	8	0.454545454545455
BP	GO:0002673	regulation of acute inflammatory response	5/108	48/18903	7.80974073704876e-06	6.62679471364284e-05	3.03644976541086e-05	IL6/CCR7/PTGS2/IL1B/TNF	5	1.04166666666667
BP	GO:0006953	acute-phase response	5/108	48/18903	7.80974073704876e-06	6.62679471364284e-05	3.03644976541086e-05	FN1/IL6/PTGS2/IL1B/TNF	5	1.04166666666667
BP	GO:0032309	icosanoid secretion	5/108	48/18903	7.80974073704876e-06	6.62679471364284e-05	3.03644976541086e-05	LEP/PLA2G10/PTGS2/PLA2G2A/IL1B	5	1.04166666666667
BP	GO:0046883	regulation of hormone secretion	9/108	234/18903	7.90581658863188e-06	6.69191614421603e-05	3.06628892010507e-05	LEP/IL6/PPP3CB/CCL5/IRS1/RETN/NKX3-1/IL1B/TNF	9	0.384615384615385
BP	GO:0051099	positive regulation of binding	8/108	177/18903	8.00567659176337e-06	6.75991520992312e-05	3.09744662998393e-05	IGF1/NRP1/MMP9/MET/TGFB1/TWIST1/TIAM1/NGF	8	0.451977401129944
BP	GO:0010560	positive regulation of glycoprotein biosynthetic process	4/108	23/18903	8.2062740554773e-06	6.84581223615962e-05	3.13680532697636e-05	IGF1/CCL21/CCR7/CCL19	4	1.73913043478261
BP	GO:0034695	response to prostaglandin E	4/108	23/18903	8.2062740554773e-06	6.84581223615962e-05	3.13680532697636e-05	CCL21/CCR7/AKT1/CCL19	4	1.73913043478261
BP	GO:0060965	negative regulation of miRNA-mediated gene silencing	4/108	23/18903	8.2062740554773e-06	6.84581223615962e-05	3.13680532697636e-05	ELAVL1/IL6/TGFB1/TNF	4	1.73913043478261
BP	GO:0072576	liver morphogenesis	4/108	23/18903	8.2062740554773e-06	6.84581223615962e-05	3.13680532697636e-05	IL6/PROX1/RPS6KA1/TNF	4	1.73913043478261
BP	GO:0090335	regulation of brown fat cell differentiation	4/108	23/18903	8.2062740554773e-06	6.84581223615962e-05	3.13680532697636e-05	LEP/PTGS2/SIX1/GATA2	4	1.73913043478261
BP	GO:0071692	protein localization to extracellular region	11/108	368/18903	8.37400404150707e-06	6.96894278646574e-05	3.19322471926902e-05	LEP/IGF1/IL6/PPP3CB/ARF6/TGFB1/VEGFC/CCL5/IRS1/IL1B/TNF	11	0.298913043478261
BP	GO:0009914	hormone transport	10/108	300/18903	8.57560553486755e-06	7.11960344405551e-05	3.26225862452238e-05	LEP/IL6/PPP3CB/ADM/CCL5/IRS1/RETN/NKX3-1/IL1B/TNF	10	0.333333333333333
BP	GO:2000027	regulation of animal organ morphogenesis	7/108	129/18903	9.21298054472132e-06	7.63046379086727e-05	3.49633887708261e-05	FGF2/HGF/VEGFA/TIAM1/RSPO2/SIX1/TNF	7	0.542635658914729
BP	GO:0051346	negative regulation of hydrolase activity	11/108	373/18903	9.50620689099323e-06	7.85453180348892e-05	3.59900861317091e-05	MMP9/RPS6KA1/AKT1/HGF/SEMA4D/VEGFA/SERPINE1/SERPINE2/PTGS2/NGF/TNF	11	0.294906166219839
BP	GO:0032964	collagen biosynthetic process	5/108	50/18903	9.57632020748071e-06	7.89362394245195e-05	3.61692094051966e-05	COL1A1/IL6/TGFB1/ADAMTS3/EMILIN1	5	1
BP	GO:0071621	granulocyte chemotaxis	7/108	130/18903	9.69193539904902e-06	7.95106169467007e-05	3.64323937300246e-05	ITGA1/ITGA9/CCL21/CCR7/CCL5/CCL19/IL1B	7	0.538461538461539
BP	GO:1990266	neutrophil migration	7/108	130/18903	9.69193539904902e-06	7.95106169467007e-05	3.64323937300246e-05	ITGA1/ITGA9/CCL21/CCR7/CCL5/CCL19/IL1B	7	0.538461538461539
BP	GO:0060149	negative regulation of post-transcriptional gene silencing	4/108	24/18903	9.80429366214317e-06	7.95817215013765e-05	3.64649743995179e-05	ELAVL1/IL6/TGFB1/TNF	4	1.66666666666667
BP	GO:0060967	negative regulation of gene silencing by RNA	4/108	24/18903	9.80429366214317e-06	7.95817215013765e-05	3.64649743995179e-05	ELAVL1/IL6/TGFB1/TNF	4	1.66666666666667
BP	GO:1900369	negative regulation of post-transcriptional gene silencing by RNA	4/108	24/18903	9.80429366214317e-06	7.95817215013765e-05	3.64649743995179e-05	ELAVL1/IL6/TGFB1/TNF	4	1.66666666666667
BP	GO:2001026	regulation of endothelial cell chemotaxis	4/108	24/18903	9.80429366214317e-06	7.95817215013765e-05	3.64649743995179e-05	FGF2/KDR/MET/VEGFA	4	1.66666666666667
BP	GO:0046890	regulation of lipid biosynthetic process	8/108	182/18903	9.81553872937255e-06	7.95817215013765e-05	3.64649743995179e-05	LEP/EGR1/PROX1/ADM/AKT1/PTGS2/IL1B/TNF	8	0.43956043956044
BP	GO:0002683	negative regulation of immune system process	12/108	449/18903	9.89105575474128e-06	8.00066238853138e-05	3.66596680334361e-05	CXCL12/FOXP3/PIK3R1/PPP3CB/ERBB2/CCL21/TGFB1/AKT1/TWIST1/EMILIN1/GATA2/TNF	12	0.267260579064588
BP	GO:0008361	regulation of cell size	8/108	183/18903	1.02161015815826e-05	8.24432253506733e-05	3.77761381019382e-05	FN1/CXCL12/NRP1/SEMA7A/SEMA4D/VEGFA/CDH1/NGF	8	0.437158469945355
BP	GO:0014910	regulation of smooth muscle cell migration	6/108	87/18903	1.04912373394441e-05	8.42706813669504e-05	3.86134929064411e-05	ADAMTS1/IGF1/NRP1/LPAR1/SERPINE1/CCL5	6	0.689655172413793
BP	GO:1900182	positive regulation of protein localization to nucleus	6/108	87/18903	1.04912373394441e-05	8.42706813669504e-05	3.86134929064411e-05	LEP/PIK3R1/TGFB1/AKT1/PTGS2/CDH1	6	0.689655172413793
BP	GO:0051489	regulation of filopodium assembly	5/108	51/18903	1.05691935271396e-05	8.47003425716603e-05	3.88103670696865e-05	NRP1/PIK3R1/CCL21/CCR7/ARF6	5	0.980392156862745
BP	GO:0034219	carbohydrate transmembrane transport	7/108	132/18903	1.07119490794832e-05	8.56461148110185e-05	3.92437273921995e-05	LEP/IGF1/PIK3R1/AKT1/IRS1/IL1B/TNF	7	0.53030303030303
BP	GO:0002697	regulation of immune effector process	11/108	379/18903	1.10390945093157e-05	8.78103223045104e-05	4.0235384387758e-05	LEP/FOXP3/IL6/SEMA7A/PPP3CB/TGFB1/TWIST1/CCL19/IL1B/GATA2/TNF	11	0.29023746701847
BP	GO:0007015	actin filament organization	12/108	454/18903	1.10506903437436e-05	8.78103223045104e-05	4.0235384387758e-05	S1PR1/CXCL12/NRP1/PIK3R1/PROX1/MET/GRB2/CCL21/CCR7/PIK3CA/LPAR1/ARF6	12	0.26431718061674
BP	GO:1905952	regulation of lipid localization	8/108	185/18903	1.10587234329193e-05	8.78103223045104e-05	4.0235384387758e-05	LEP/IL6/PLA2G10/AKT1/RETN/NKX3-1/IL1B/TNF	8	0.432432432432432
BP	GO:0001101	response to acid chemical	7/108	133/18903	1.12543894643002e-05	8.89559276835783e-05	4.07603098358577e-05	COL1A1/NTRK2/COL1A2/PIK3CA/VEGFA/SIX1/TNF	7	0.526315789473684
BP	GO:0002244	hematopoietic progenitor cell differentiation	7/108	133/18903	1.12543894643002e-05	8.89559276835783e-05	4.07603098358577e-05	FLT4/KDR/SOS1/FLT1/TGFB1/CEBPD/GATA2	7	0.526315789473684
BP	GO:0048469	cell maturation	8/108	187/18903	1.19592205134534e-05	9.41178392100213e-05	4.31255385355292e-05	EPAS1/KDR/PLA2G10/CCL21/SOX18/VEGFA/CCL19/GATA2	8	0.427807486631016
BP	GO:0048864	stem cell development	6/108	89/18903	1.19618282069351e-05	9.41178392100213e-05	4.31255385355292e-05	FN1/FGF2/NRP1/SEMA7A/TWIST1/SEMA4D	6	0.674157303370786
BP	GO:0052547	regulation of peptidase activity	12/108	459/18903	1.23278624123112e-05	9.67779130871234e-05	4.43444054310849e-05	FN1/MMP9/RPS6KA1/AKT1/HGF/VEGFA/SERPINE1/SERPINE2/PTGS2/NKX3-1/NGF/TNF	12	0.261437908496732
BP	GO:0048863	stem cell differentiation	9/108	248/18903	1.25957808197459e-05	9.86574506741186e-05	4.52056244233321e-05	FN1/FGF2/NRP1/SEMA7A/ITGB1/TWIST1/SOX18/SEMA4D/SIX1	9	0.362903225806452
BP	GO:0070098	chemokine-mediated signaling pathway	6/108	90/18903	1.27572193036916e-05	9.96963729782852e-05	4.56816668424932e-05	CXCL12/CCL21/CXCR4/CCR7/CCL5/CCL19	6	0.666666666666667
BP	GO:0051302	regulation of cell division	8/108	190/18903	1.34254404812164e-05	0.000104682150779215	4.79661896756594e-05	VEGFD/FGF2/VEGFB/TGFB1/VEGFC/VEGFA/NKX3-1/IL1B	8	0.421052631578947
BP	GO:0051894	positive regulation of focal adhesion assembly	4/108	26/18903	1.36730883571651e-05	0.000105897610497775	4.85231229347647e-05	TEK/NRP1/KDR/VEGFA	4	1.53846153846154
BP	GO:0060384	innervation	4/108	26/18903	1.36730883571651e-05	0.000105897610497775	4.85231229347647e-05	NRP1/SULF2/SERPINE2/ITGA4	4	1.53846153846154
BP	GO:1903020	positive regulation of glycoprotein metabolic process	4/108	26/18903	1.36730883571651e-05	0.000105897610497775	4.85231229347647e-05	IGF1/CCL21/CCR7/CCL19	4	1.53846153846154
BP	GO:1902105	regulation of leukocyte differentiation	10/108	317/18903	1.38444495992546e-05	0.000106985456501383	4.90215825800674e-05	FOXP3/SMARCA4/CYP26B1/PIK3R1/SOS1/ERBB2/TGFB1/CCL19/GATA2/TNF	10	0.315457413249211
BP	GO:0008217	regulation of blood pressure	8/108	191/18903	1.39466277041397e-05	0.00010753502252056	4.9273398077924e-05	LEP/ACVRL1/COL1A2/VEGFC/ADM/PTGS2/EMILIN1/TNF	8	0.418848167539267
BP	GO:0031334	positive regulation of protein-containing complex assembly	8/108	192/18903	1.44847514288804e-05	0.000111436020992853	5.1060866440521e-05	MET/GRB2/CCL21/CCR7/ARF6/TGFB1/VEGFA/TNF	8	0.416666666666667
BP	GO:0097305	response to alcohol	9/108	253/18903	1.47661762718048e-05	0.000113349228942325	5.19375134592365e-05	LEP/FOXP3/CCL21/CCR7/TGFB1/AKT1/CCL19/CDH1/TNF	9	0.355731225296443
BP	GO:0002043	blood vessel endothelial cell proliferation involved in sprouting angiogenesis	5/108	55/18903	1.53708377929337e-05	0.000116944611004846	5.35849459650045e-05	FGF2/ACVRL1/EPHA2/VEGFA/GATA2	5	0.909090909090909
BP	GO:0010518	positive regulation of phospholipase activity	5/108	55/18903	1.53708377929337e-05	0.000116944611004846	5.35849459650045e-05	FGF2/FGFR3/FLT1/LPAR1/CCL5	5	0.909090909090909
BP	GO:2000107	negative regulation of leukocyte apoptotic process	5/108	55/18903	1.53708377929337e-05	0.000116944611004846	5.35849459650045e-05	CXCL12/CCL21/CCR7/CCL5/CCL19	5	0.909090909090909
BP	GO:1904705	regulation of vascular associated smooth muscle cell proliferation	6/108	93/18903	1.54034496297545e-05	0.000116944611004846	5.35849459650045e-05	ADAMTS1/IGF1/FGF2/MMP9/JUN/TNF	6	0.645161290322581
BP	GO:2000106	regulation of leukocyte apoptotic process	6/108	93/18903	1.54034496297545e-05	0.000116944611004846	5.35849459650045e-05	CXCL12/CDKN2A/CCL21/CCR7/CCL5/CCL19	6	0.645161290322581
BP	GO:0014706	striated muscle tissue development	9/108	257/18903	1.67249366205735e-05	0.000126699629278831	5.80547725145786e-05	S1PR1/IGF1/FGF2/PROX1/ITGB1/TGFB1/TWIST1/VEGFA/MAPK11	9	0.350194552529183
BP	GO:0071715	icosanoid transport	5/108	56/18903	1.68014648931918e-05	0.000126830941816802	5.81149409583511e-05	LEP/PLA2G10/PTGS2/PLA2G2A/IL1B	5	0.892857142857143
BP	GO:0045664	regulation of neuron differentiation	8/108	196/18903	1.68155408127996e-05	0.000126830941816802	5.81149409583511e-05	CXCL12/FGF2/PROX1/ITGB1/TIAM1/SIX1/NGF/GATA2	8	0.408163265306122
BP	GO:0014909	smooth muscle cell migration	6/108	95/18903	1.74015659385007e-05	0.000130681607980671	5.98793466590263e-05	ADAMTS1/IGF1/NRP1/LPAR1/SERPINE1/CCL5	6	0.631578947368421
BP	GO:1990874	vascular associated smooth muscle cell proliferation	6/108	95/18903	1.74015659385007e-05	0.000130681607980671	5.98793466590263e-05	ADAMTS1/IGF1/FGF2/MMP9/JUN/TNF	6	0.631578947368421
BP	GO:0038066	p38MAPK cascade	5/108	57/18903	1.83337203476054e-05	0.000137087127091598	6.28144061926596e-05	LEP/HGF/VEGFA/MAPK11/IL1B	5	0.87719298245614
BP	GO:0043388	positive regulation of DNA binding	5/108	57/18903	1.83337203476054e-05	0.000137087127091598	6.28144061926596e-05	IGF1/MMP9/TGFB1/TWIST1/NGF	5	0.87719298245614
BP	GO:0014033	neural crest cell differentiation	6/108	96/18903	1.84762153761411e-05	0.000137558403510109	6.30303487761056e-05	FN1/NRP1/SEMA7A/TWIST1/SEMA4D/SIX1	6	0.625
BP	GO:0046330	positive regulation of JNK cascade	6/108	96/18903	1.84762153761411e-05	0.000137558403510109	6.30303487761056e-05	FLT4/CCL21/CCR7/CCL19/IL1B/TNF	6	0.625
BP	GO:0002052	positive regulation of neuroblast proliferation	4/108	28/18903	1.85621970076112e-05	0.000137901987211051	6.31877815461261e-05	FGF2/ITGB1/VEGFC/VEGFA	4	1.42857142857143
BP	GO:0120032	regulation of plasma membrane bounded cell projection assembly	8/108	199/18903	1.87638824468878e-05	0.000139101843749734	6.37375653047672e-05	NRP1/PIK3R1/EPHA2/CCL21/CCR7/PIK3CA/ARF6/CCL19	8	0.402010050251256
BP	GO:0051051	negative regulation of transport	12/108	479/18903	1.8822395768583e-05	0.000139237466134262	6.37997085543289e-05	LEP/MMP9/PPP3CB/PLA2G10/ARF6/AKT1/TWIST1/SERPINE2/PTGS2/IRS1/IL1B/TNF	12	0.250521920668058
BP	GO:0030177	positive regulation of Wnt signaling pathway	7/108	144/18903	1.88802228734884e-05	0.000139367444750569	6.38592657846416e-05	COL1A1/SMARCA4/FGF2/SULF2/TGFB1/TBL1XR1/RSPO2	7	0.486111111111111
BP	GO:0060491	regulation of cell projection assembly	8/108	201/18903	2.01654484839384e-05	0.000148537835428499	6.8061211344446e-05	NRP1/PIK3R1/EPHA2/CCL21/CCR7/PIK3CA/ARF6/CCL19	8	0.398009950248756
BP	GO:0032642	regulation of chemokine production	6/108	98/18903	2.07861421589554e-05	0.00015213874028394	6.97111744376228e-05	EGR1/IL6/EPHA2/TWIST1/IL1B/TNF	6	0.612244897959184
BP	GO:1990868	response to chemokine	6/108	98/18903	2.07861421589554e-05	0.00015213874028394	6.97111744376228e-05	CXCL12/CCL21/CXCR4/CCR7/CCL5/CCL19	6	0.612244897959184
BP	GO:1990869	cellular response to chemokine	6/108	98/18903	2.07861421589554e-05	0.00015213874028394	6.97111744376228e-05	CXCL12/CCL21/CXCR4/CCR7/CCL5/CCL19	6	0.612244897959184
BP	GO:0002676	regulation of chronic inflammatory response	3/108	10/18903	2.11391263738488e-05	0.000154395897692541	7.07454218196539e-05	FOXP3/CCL5/TNF	3	3
BP	GO:0070977	bone maturation	4/108	29/18903	2.14376810181864e-05	0.00015624684565255	7.15935408186301e-05	LEP/IGF1/FGFR3/SEMA4D	4	1.37931034482759
BP	GO:0001755	neural crest cell migration	5/108	59/18903	2.17232806457011e-05	0.000157664565189554	7.22431511267166e-05	FN1/NRP1/SEMA7A/TWIST1/SEMA4D	5	0.847457627118644
BP	GO:0042306	regulation of protein import into nucleus	5/108	59/18903	2.17232806457011e-05	0.000157664565189554	7.22431511267166e-05	LEP/PIK3R1/TGFB1/PTGS2/CDH1	5	0.847457627118644
BP	GO:0032602	chemokine production	6/108	99/18903	2.20253320920714e-05	0.000159522384315379	7.30944185482308e-05	EGR1/IL6/EPHA2/TWIST1/IL1B/TNF	6	0.606060606060606
BP	GO:0009615	response to virus	11/108	409/18903	2.23797477544775e-05	0.000161750911745305	7.41155474475279e-05	CXCL12/FOXP3/IL6/PLA2G10/CXCR4/LGALS8/CCL5/MAPK11/CCL19/IL1B/TNF	11	0.268948655256724
BP	GO:0016042	lipid catabolic process	10/108	336/18903	2.2834248842462e-05	0.000164349624724747	7.53062982943216e-05	LEP/CYP26B1/PLA2G10/AKT1/TWIST1/TBL1XR1/IRS1/PLA2G2A/IL1B/TNF	10	0.297619047619048
BP	GO:0030111	regulation of Wnt signaling pathway	10/108	336/18903	2.2834248842462e-05	0.000164349624724747	7.53062982943216e-05	EGR1/COL1A1/SMARCA4/FGF2/IGFBP1/SULF2/TGFB1/TBL1XR1/TIAM1/RSPO2	10	0.297619047619048
BP	GO:0007204	positive regulation of cytosolic calcium ion concentration	8/108	205/18903	2.32336043657502e-05	0.000166531549304818	7.63060733991185e-05	S1PR1/CXCR4/CCR7/LPAR1/CD24/ADM/GATA2/PTGER1	8	0.390243902439024
BP	GO:0043281	regulation of cysteine-type endopeptidase activity involved in apoptotic process	8/108	205/18903	2.32336043657502e-05	0.000166531549304818	7.63060733991185e-05	MMP9/RPS6KA1/AKT1/HGF/VEGFA/PTGS2/NKX3-1/TNF	8	0.390243902439024
BP	GO:0016525	negative regulation of angiogenesis	7/108	149/18903	2.35413347635634e-05	0.000167695680970075	7.68394877381201e-05	TEK/ADAMTS1/TIE1/EPHA2/SERPINE1/EMILIN1/TNF	7	0.469798657718121
BP	GO:0050796	regulation of insulin secretion	7/108	149/18903	2.35413347635634e-05	0.000167695680970075	7.68394877381201e-05	LEP/IL6/PPP3CB/CCL5/IRS1/IL1B/TNF	7	0.469798657718121
BP	GO:0061351	neural precursor cell proliferation	7/108	149/18903	2.35413347635634e-05	0.000167695680970075	7.68394877381201e-05	FGF2/PROX1/ITGB1/VEGFC/NES/VEGFA/GATA2	7	0.469798657718121
BP	GO:0001890	placenta development	7/108	150/18903	2.45787604157216e-05	0.00017472621880745	8.00609357970224e-05	EPAS1/LEP/GRB2/ADM/AKT1/PTGS2/GATA2	7	0.466666666666667
BP	GO:0048545	response to steroid hormone	10/108	339/18903	2.46349013715946e-05	0.000174766451943567	8.0079370938294e-05	GHR/COL1A1/SMARCA4/IL6/PIK3CA/TGFB1/ADM/PTGS2/NKX3-1/TNF	10	0.294985250737463
BP	GO:0090497	mesenchymal cell migration	5/108	61/18903	2.55812023665737e-05	0.000181108635159669	8.29854094638395e-05	FN1/NRP1/SEMA7A/TWIST1/SEMA4D	5	0.819672131147541
BP	GO:2000181	negative regulation of blood vessel morphogenesis	7/108	151/18903	2.56535919573447e-05	0.000181250480319036	8.30504040380634e-05	TEK/ADAMTS1/TIE1/EPHA2/SERPINE1/EMILIN1/TNF	7	0.463576158940397
BP	GO:0044703	multi-organism reproductive process	8/108	209/18903	2.66843198629288e-05	0.000187965326568103	8.61271997136221e-05	LEP/MMP9/ADM/AKT1/VEGFA/SERPINE2/PTGS2/IL1B	8	0.382775119617225
BP	GO:0072006	nephron development	7/108	152/18903	2.67668705944757e-05	0.000187965326568103	8.61271997136221e-05	TEK/EGR1/FGF2/SULF2/CD24/VEGFA/SIX1	7	0.460526315789474
BP	GO:1901343	negative regulation of vasculature development	7/108	152/18903	2.67668705944757e-05	0.000187965326568103	8.61271997136221e-05	TEK/ADAMTS1/TIE1/EPHA2/SERPINE1/EMILIN1/TNF	7	0.460526315789474
BP	GO:0035904	aorta development	5/108	62/18903	2.76994183760076e-05	0.000193728053369168	8.87677267254511e-05	LEP/ACVRL1/PROX1/SIX1/NKX3-1	5	0.806451612903226
BP	GO:0090303	positive regulation of wound healing	5/108	62/18903	2.76994183760076e-05	0.000193728053369168	8.87677267254511e-05	CXCR4/ITGB1/SERPINE1/HPSE/EMILIN1	5	0.806451612903226
BP	GO:0034694	response to prostaglandin	4/108	31/18903	2.81517472012487e-05	0.000196099293381737	8.985424765918e-05	CCL21/CCR7/AKT1/CCL19	4	1.29032258064516
BP	GO:0051491	positive regulation of filopodium assembly	4/108	31/18903	2.81517472012487e-05	0.000196099293381737	8.985424765918e-05	NRP1/PIK3R1/CCL21/CCR7	4	1.29032258064516
BP	GO:0062197	cellular response to chemical stress	10/108	345/18903	2.86046836333817e-05	0.000198854246463389	9.11165889568934e-05	EPAS1/MMP9/IL6/JUN/MET/PIK3CA/AKT1/HGF/PTGS2/TNF	10	0.289855072463768
BP	GO:0001660	fever generation	3/108	11/18903	2.89453906253431e-05	0.000200204607159927	9.17353349113715e-05	PTGS2/IL1B/TNF	3	2.72727272727273
BP	GO:0002604	regulation of dendritic cell antigen processing and presentation	3/108	11/18903	2.89453906253431e-05	0.000200204607159927	9.17353349113715e-05	CCL21/CCR7/CCL19	3	2.72727272727273
BP	GO:0034763	negative regulation of transmembrane transport	7/108	154/18903	2.91130336632253e-05	0.000200204607159927	9.17353349113715e-05	LEP/MMP9/PPP3CB/AKT1/TWIST1/IL1B/TNF	7	0.454545454545455
BP	GO:0050729	positive regulation of inflammatory response	7/108	154/18903	2.91130336632253e-05	0.000200204607159927	9.17353349113715e-05	IL6/CCR7/SERPINE1/PTGS2/PLA2G2A/IL1B/TNF	7	0.454545454545455
BP	GO:0046425	regulation of receptor signaling pathway via JAK-STAT	6/108	104/18903	2.91459046818611e-05	0.000200204607159927	9.17353349113715e-05	GHR/LEP/IL6/IL24/CCL5/TNF	6	0.576923076923077
BP	GO:0110020	regulation of actomyosin structure organization	6/108	104/18903	2.91459046818611e-05	0.000200204607159927	9.17353349113715e-05	S1PR1/NRP1/PIK3R1/PROX1/MET/LPAR1	6	0.576923076923077
BP	GO:0031663	lipopolysaccharide-mediated signaling pathway	5/108	63/18903	2.99513397710719e-05	0.000204519799383532	9.37125901276972e-05	TGFB1/AKT1/CCL5/IL1B/TNF	5	0.793650793650794
BP	GO:0032757	positive regulation of interleukin-8 production	5/108	63/18903	2.99513397710719e-05	0.000204519799383532	9.37125901276972e-05	LEP/IL6/SERPINE1/IL1B/TNF	5	0.793650793650794
BP	GO:0050994	regulation of lipid catabolic process	5/108	63/18903	2.99513397710719e-05	0.000204519799383532	9.37125901276972e-05	AKT1/TWIST1/IRS1/IL1B/TNF	5	0.793650793650794
BP	GO:0035148	tube formation	7/108	155/18903	3.03481007253944e-05	0.000206821111636447	9.47670696087222e-05	FGF2/PROX1/TGFB1/ADM/TWIST1/VEGFA/SIX1	7	0.451612903225806
BP	GO:0008643	carbohydrate transport	7/108	156/18903	3.16259804970107e-05	0.000215106374225248	9.8563442475432e-05	LEP/IGF1/PIK3R1/AKT1/IRS1/IL1B/TNF	7	0.448717948717949
BP	GO:0003180	aortic valve morphogenesis	4/108	32/18903	3.20323334751449e-05	0.000217017492154504	9.94391318303499e-05	TIE1/TGFB1/TWIST1/EMILIN1	4	1.25
BP	GO:0061384	heart trabecula morphogenesis	4/108	32/18903	3.20323334751449e-05	0.000217017492154504	9.94391318303499e-05	S1PR1/TEK/ADAMTS1/SOS1	4	1.25
BP	GO:0030199	collagen fibril organization	5/108	64/18903	3.23427876679891e-05	0.000217841888923304	9.9816876951996e-05	COL1A1/COL1A2/ADAMTS3/LOXL2/EMILIN1	5	0.78125
BP	GO:0051893	regulation of focal adhesion assembly	5/108	64/18903	3.23427876679891e-05	0.000217841888923304	9.9816876951996e-05	TEK/NRP1/ACVRL1/KDR/VEGFA	5	0.78125
BP	GO:0090109	regulation of cell-substrate junction assembly	5/108	64/18903	3.23427876679891e-05	0.000217841888923304	9.9816876951996e-05	TEK/NRP1/ACVRL1/KDR/VEGFA	5	0.78125
BP	GO:0090316	positive regulation of intracellular protein transport	7/108	157/18903	3.29478154610274e-05	0.000221486091506946	0.000101486679406782	LEP/PIK3R1/ERBB2/TGFB1/PTGS2/IL1B/CDH1	7	0.445859872611465
BP	GO:0052548	regulation of endopeptidase activity	11/108	428/18903	3.3910210208978e-05	0.000227129233362923	0.000104072411650681	MMP9/RPS6KA1/AKT1/HGF/VEGFA/SERPINE1/SERPINE2/PTGS2/NKX3-1/NGF/TNF	11	0.257009345794392
BP	GO:0045861	negative regulation of proteolysis	10/108	352/18903	3.39184903664446e-05	0.000227129233362923	0.000104072411650681	MMP9/RPS6KA1/AKT1/HGF/VEGFA/SERPINE1/SERPINE2/PTGS2/NGF/TNF	10	0.284090909090909
BP	GO:0097530	granulocyte migration	7/108	158/18903	3.43147688794141e-05	0.000229339246835003	0.000105085057308021	ITGA1/ITGA9/CCL21/CCR7/CCL5/CCL19/IL1B	7	0.443037974683544
BP	GO:0031100	animal organ regeneration	5/108	65/18903	3.48797188028555e-05	0.000231772718801316	0.000106200093415301	CXCL12/IL6/ADM/HGF/TNF	5	0.769230769230769
BP	GO:1905330	regulation of morphogenesis of an epithelium	5/108	65/18903	3.48797188028555e-05	0.000231772718801316	0.000106200093415301	FGF2/HGF/VEGFA/SIX1/TNF	5	0.769230769230769
BP	GO:1905953	negative regulation of lipid localization	5/108	65/18903	3.48797188028555e-05	0.000231772718801316	0.000106200093415301	LEP/IL6/PLA2G10/AKT1/TNF	5	0.769230769230769
BP	GO:0035051	cardiocyte differentiation	7/108	159/18903	3.57280249638856e-05	0.000236050424475137	0.000108160171997942	IGF1/PROX1/ITGB1/TGFB1/TWIST1/SOX18/VEGFA	7	0.440251572327044
BP	GO:0036294	cellular response to decreased oxygen levels	7/108	159/18903	3.57280249638856e-05	0.000236050424475137	0.000108160171997942	EPAS1/EGR1/AKT1/TWIST1/VEGFA/PTGS2/NKX3-1	7	0.440251572327044
BP	GO:0048592	eye morphogenesis	7/108	159/18903	3.57280249638856e-05	0.000236050424475137	0.000108160171997942	FGF2/KDR/NTRK2/PROX1/EPHA2/TWIST1/VEGFA	7	0.440251572327044
BP	GO:0042180	cellular ketone metabolic process	8/108	218/18903	3.60440060862554e-05	0.000237232602795848	0.000108701855457248	EGR1/PROX1/ADM/AKT1/TWIST1/PTGS2/IRS1/IL1B	8	0.36697247706422
BP	GO:0044706	multi-multicellular organism process	8/108	218/18903	3.60440060862554e-05	0.000237232602795848	0.000108701855457248	LEP/MMP9/ADM/AKT1/VEGFA/SERPINE2/PTGS2/IL1B	8	0.36697247706422
BP	GO:0030947	regulation of vascular endothelial growth factor receptor signaling pathway	4/108	33/18903	3.6290761026397e-05	0.000237502107133056	0.000108825344476729	NRP1/VEGFC/EMILIN1/IL1B	4	1.21212121212121
BP	GO:0048799	animal organ maturation	4/108	33/18903	3.6290761026397e-05	0.000237502107133056	0.000108825344476729	LEP/IGF1/FGFR3/SEMA4D	4	1.21212121212121
BP	GO:0050974	detection of mechanical stimulus involved in sensory perception	4/108	33/18903	3.6290761026397e-05	0.000237502107133056	0.000108825344476729	CXCL12/CXCR4/SERPINE2/TNF	4	1.21212121212121
BP	GO:0010517	regulation of phospholipase activity	5/108	66/18903	3.75682253903096e-05	0.00024493633955038	0.000112231768585978	FGF2/FGFR3/FLT1/LPAR1/CCL5	5	0.757575757575758
BP	GO:0010812	negative regulation of cell-substrate adhesion	5/108	66/18903	3.75682253903096e-05	0.00024493633955038	0.000112231768585978	COL1A1/CDKN2A/ACVRL1/PIK3R1/SERPINE1	5	0.757575757575758
BP	GO:0001708	cell fate specification	6/108	109/18903	3.80101269775528e-05	0.000247351615782496	0.000113338467263894	FGF2/NRP1/ITGB1/SOX18/HOXD10/SIX1	6	0.55045871559633
BP	GO:0003157	endocardium development	3/108	12/18903	3.84333523223638e-05	0.000247777031173228	0.000113533395961584	KDR/PROX1/SOX18	3	2.5
BP	GO:0031650	regulation of heat generation	3/108	12/18903	3.84333523223638e-05	0.000247777031173228	0.000113533395961584	PTGS2/IL1B/TNF	3	2.5
BP	GO:0033083	regulation of immature T cell proliferation	3/108	12/18903	3.84333523223638e-05	0.000247777031173228	0.000113533395961584	FOXP3/ERBB2/IL1B	3	2.5
BP	GO:0033084	regulation of immature T cell proliferation in thymus	3/108	12/18903	3.84333523223638e-05	0.000247777031173228	0.000113533395961584	FOXP3/ERBB2/IL1B	3	2.5
BP	GO:0043589	skin morphogenesis	3/108	12/18903	3.84333523223638e-05	0.000247777031173228	0.000113533395961584	COL1A1/COL1A2/ITGA6	3	2.5
BP	GO:0007405	neuroblast proliferation	5/108	67/18903	4.04145349346844e-05	0.000260065278706092	0.000119163968199118	FGF2/PROX1/ITGB1/VEGFC/VEGFA	5	0.746268656716418
BP	GO:0071222	cellular response to lipopolysaccharide	8/108	222/18903	4.10083846961256e-05	0.000263397083150254	0.00012069062735487	IL6/IL24/TGFB1/AKT1/SERPINE1/CCL5/IL1B/TNF	8	0.36036036036036
BP	GO:0032611	interleukin-1 beta production	6/108	111/18903	4.21102515091369e-05	0.000268977289159837	0.000123247521896037	EGR1/IGF1/IL6/CCR7/CCL19/TNF	6	0.540540540540541
BP	GO:0032651	regulation of interleukin-1 beta production	6/108	111/18903	4.21102515091369e-05	0.000268977289159837	0.000123247521896037	EGR1/IGF1/IL6/CCR7/CCL19/TNF	6	0.540540540540541
BP	GO:0120034	positive regulation of plasma membrane bounded cell projection assembly	6/108	111/18903	4.21102515091369e-05	0.000268977289159837	0.000123247521896037	NRP1/PIK3R1/CCL21/CCR7/PIK3CA/CCL19	6	0.540540540540541
BP	GO:0060193	positive regulation of lipase activity	5/108	68/18903	4.34250099947264e-05	0.000276864428364167	0.000126861471478245	FGF2/FGFR3/FLT1/LPAR1/CCL5	5	0.735294117647059
BP	GO:0007519	skeletal muscle tissue development	7/108	164/18903	4.35317804201909e-05	0.000277034970247612	0.000126939615118475	EGR1/CYP26B1/PPP3CB/TGFB1/TWIST1/HOXD10/SIX1	7	0.426829268292683
BP	GO:0045445	myoblast differentiation	6/108	112/18903	4.42892090724768e-05	0.000281338058364981	0.000128911324137562	EPAS1/IGF1/SMARCA4/ITGB1/TGFB1/TNF	6	0.535714285714286
BP	GO:0007596	blood coagulation	8/108	225/18903	4.50957997572368e-05	0.000285340153831822	0.000130745115942886	FN1/IL6/CD9/PIK3CA/SERPINE1/SERPINE2/HPSE/EMILIN1	8	0.355555555555556
BP	GO:0033157	regulation of intracellular protein transport	8/108	225/18903	4.50957997572368e-05	0.000285340153831822	0.000130745115942886	LEP/PTPN14/PIK3R1/ERBB2/TGFB1/PTGS2/IL1B/CDH1	8	0.355555555555556
BP	GO:0006606	protein import into nucleus	7/108	165/18903	4.52489152090325e-05	0.000285340153831822	0.000130745115942886	LEP/ELAVL1/PIK3R1/TGFB1/AKT1/PTGS2/CDH1	7	0.424242424242424
BP	GO:0031960	response to corticosteroid	7/108	165/18903	4.52489152090325e-05	0.000285340153831822	0.000130745115942886	GHR/COL1A1/IL6/PIK3CA/ADM/PTGS2/TNF	7	0.424242424242424
BP	GO:0002719	negative regulation of cytokine production involved in immune response	4/108	35/18903	4.60303252991649e-05	0.000287129704839115	0.000131565102372388	FOXP3/TGFB1/TWIST1/TNF	4	1.14285714285714
BP	GO:0030212	hyaluronan metabolic process	4/108	35/18903	4.60303252991649e-05	0.000287129704839115	0.000131565102372388	LYVE1/FGF2/TGFB1/IL1B	4	1.14285714285714
BP	GO:0035633	maintenance of blood-brain barrier	4/108	35/18903	4.60303252991649e-05	0.000287129704839115	0.000131565102372388	IL6/ITGB1/VEGFA/PTGS2	4	1.14285714285714
BP	GO:0043276	anoikis	4/108	35/18903	4.60303252991649e-05	0.000287129704839115	0.000131565102372388	NTRK2/ITGB1/PIK3CA/AKT1	4	1.14285714285714
BP	GO:2000352	negative regulation of endothelial cell apoptotic process	4/108	35/18903	4.60303252991649e-05	0.000287129704839115	0.000131565102372388	TEK/KDR/SERPINE1/GATA2	4	1.14285714285714
BP	GO:2000406	positive regulation of T cell migration	4/108	35/18903	4.60303252991649e-05	0.000287129704839115	0.000131565102372388	CXCL12/CCL21/CCL5/ITGA4	4	1.14285714285714
BP	GO:0046847	filopodium assembly	5/108	69/18903	4.66061479029423e-05	0.000289677709227983	0.000132732618141801	NRP1/PIK3R1/CCL21/CCR7/ARF6	5	0.72463768115942
BP	GO:2000401	regulation of lymphocyte migration	5/108	69/18903	4.66061479029423e-05	0.000289677709227983	0.000132732618141801	CXCL12/CCL21/AKT1/CCL5/ITGA4	5	0.72463768115942
BP	GO:0043271	negative regulation of ion transport	7/108	167/18903	4.88501206816067e-05	0.000302959922746068	0.000138818633457485	LEP/MMP9/PPP3CB/TWIST1/SERPINE2/PTGS2/TNF	7	0.419161676646707
BP	GO:0002526	acute inflammatory response	6/108	114/18903	4.89181388836083e-05	0.000302959922746068	0.000138818633457485	FN1/IL6/CCR7/PTGS2/IL1B/TNF	6	0.526315789473684
BP	GO:0033079	immature T cell proliferation	3/108	13/18903	4.97556231459451e-05	0.000304537636418036	0.000139541554344	FOXP3/ERBB2/IL1B	3	2.30769230769231
BP	GO:0033080	immature T cell proliferation in thymus	3/108	13/18903	4.97556231459451e-05	0.000304537636418036	0.000139541554344	FOXP3/ERBB2/IL1B	3	2.30769230769231
BP	GO:0048012	hepatocyte growth factor receptor signaling pathway	3/108	13/18903	4.97556231459451e-05	0.000304537636418036	0.000139541554344	NRP1/MET/HGF	3	2.30769230769231
BP	GO:0060837	blood vessel endothelial cell differentiation	3/108	13/18903	4.97556231459451e-05	0.000304537636418036	0.000139541554344	NRP1/KDR/PROX1	3	2.30769230769231
BP	GO:0061029	eyelid development in camera-type eye	3/108	13/18903	4.97556231459451e-05	0.000304537636418036	0.000139541554344	JUN/SOS1/TWIST1	3	2.30769230769231
BP	GO:0071696	ectodermal placode development	3/108	13/18903	4.97556231459451e-05	0.000304537636418036	0.000139541554344	NRP1/PROX1/SIX1	3	2.30769230769231
BP	GO:0014823	response to activity	5/108	70/18903	4.99645804406252e-05	0.000304537636418036	0.000139541554344	LEP/IL6/CXCR4/PIK3CA/TNF	5	0.714285714285714
BP	GO:0030193	regulation of blood coagulation	5/108	70/18903	4.99645804406252e-05	0.000304537636418036	0.000139541554344	CD9/SERPINE1/SERPINE2/HPSE/EMILIN1	5	0.714285714285714
BP	GO:0032722	positive regulation of chemokine production	5/108	70/18903	4.99645804406252e-05	0.000304537636418036	0.000139541554344	EGR1/IL6/TWIST1/IL1B/TNF	5	0.714285714285714
BP	GO:0042303	molting cycle	6/108	115/18903	5.13735498689299e-05	0.00031148026207747	0.000142722720347456	SOS1/PLA2G10/SOX18/PTGS2/HPSE/TNF	6	0.521739130434783
BP	GO:0042633	hair cycle	6/108	115/18903	5.13735498689299e-05	0.00031148026207747	0.000142722720347456	SOS1/PLA2G10/SOX18/PTGS2/HPSE/TNF	6	0.521739130434783
BP	GO:0048640	negative regulation of developmental growth	6/108	115/18903	5.13735498689299e-05	0.00031148026207747	0.000142722720347456	NRP1/FGFR3/SEMA7A/SEMA4D/MAPK11/CDH1	6	0.521739130434783
BP	GO:0050817	coagulation	8/108	230/18903	5.26624431404505e-05	0.000317750509345384	0.000145595797252423	FN1/IL6/CD9/PIK3CA/SERPINE1/SERPINE2/HPSE/EMILIN1	8	0.347826086956522
BP	GO:0007568	aging	7/108	169/18903	5.26830711624062e-05	0.000317750509345384	0.000145595797252423	FGF2/GRB2/IGFBP1/ADM/PTGS2/RETN/LOXL2	7	0.414201183431953
BP	GO:0051170	import into nucleus	7/108	169/18903	5.26830711624062e-05	0.000317750509345384	0.000145595797252423	LEP/ELAVL1/PIK3R1/TGFB1/AKT1/PTGS2/CDH1	7	0.414201183431953
BP	GO:0097193	intrinsic apoptotic signaling pathway	9/108	298/18903	5.3262850096313e-05	0.000320688673101627	0.000146942087130698	CXCL12/PIK3R1/MMP9/EPHA2/CD24/AKT1/PTGS2/NKX3-1/TNF	9	0.302013422818792
BP	GO:0007599	hemostasis	8/108	231/18903	5.42960795335757e-05	0.000326342061363262	0.000149532514358733	FN1/IL6/CD9/PIK3CA/SERPINE1/SERPINE2/HPSE/EMILIN1	8	0.346320346320346
BP	GO:0021782	glial cell development	6/108	117/18903	5.65802363054086e-05	0.000339481417832451	0.000155553071444405	IL6/NTRK2/LPAR1/AKT1/IL1B/TNF	6	0.512820512820513
BP	GO:1900046	regulation of hemostasis	5/108	72/18903	5.72405265216371e-05	0.000342848966812989	0.000157096109029516	CD9/SERPINE1/SERPINE2/HPSE/EMILIN1	5	0.694444444444444
BP	GO:0003176	aortic valve development	4/108	37/18903	5.75531943087922e-05	0.000342941753351185	0.000157138624555394	TIE1/TGFB1/TWIST1/EMILIN1	4	1.08108108108108
BP	GO:0034110	regulation of homotypic cell-cell adhesion	4/108	37/18903	5.75531943087922e-05	0.000342941753351185	0.000157138624555394	IL6/CD9/SERPINE2/CCL5	4	1.08108108108108
BP	GO:0046326	positive regulation of glucose import	4/108	37/18903	5.75531943087922e-05	0.000342941753351185	0.000157138624555394	IGF1/PIK3R1/AKT1/IRS1	4	1.08108108108108
BP	GO:0043200	response to amino acid	6/108	118/18903	5.93372517541638e-05	0.000352439718945943	0.000161490667533685	COL1A1/NTRK2/COL1A2/PIK3CA/SIX1/TNF	6	0.508474576271186
BP	GO:0009743	response to carbohydrate	8/108	234/18903	5.94525695737813e-05	0.000352439718945943	0.000161490667533685	LEP/EGR1/SMARCA4/PPP3CB/PIK3CA/PTGS2/IL1B/TNF	8	0.341880341880342
BP	GO:0071219	cellular response to molecule of bacterial origin	8/108	234/18903	5.94525695737813e-05	0.000352439718945943	0.000161490667533685	IL6/IL24/TGFB1/AKT1/SERPINE1/CCL5/IL1B/TNF	8	0.341880341880342
BP	GO:0016055	Wnt signaling pathway	11/108	456/18903	6.0109001926467e-05	0.000355721990887912	0.000162994630505058	EGR1/COL1A1/SMARCA4/FGF2/IGFBP1/SULF2/TGFB1/CD24/TBL1XR1/TIAM1/RSPO2	11	0.241228070175439
BP	GO:0030032	lamellipodium assembly	5/108	73/18903	6.11719723467548e-05	0.000360680724792566	0.000165266761610994	S1PR1/PIK3R1/EPHA2/ITGB1/PIK3CA	5	0.684931506849315
BP	GO:0072678	T cell migration	5/108	73/18903	6.11719723467548e-05	0.000360680724792566	0.000165266761610994	S1PR1/CXCL12/CCL21/CCL5/ITGA4	5	0.684931506849315
BP	GO:2000116	regulation of cysteine-type endopeptidase activity	8/108	235/18903	6.12594645228275e-05	0.000360680724792566	0.000165266761610994	MMP9/RPS6KA1/AKT1/HGF/VEGFA/PTGS2/NKX3-1/TNF	8	0.340425531914894
BP	GO:0015718	monocarboxylic acid transport	6/108	119/18903	6.22006264182049e-05	0.000365600286349449	0.000167520943637271	LEP/PLA2G10/PTGS2/PLA2G2A/IL1B/TNF	6	0.504201680672269
BP	GO:0198738	cell-cell signaling by wnt	11/108	458/18903	6.25120938799434e-05	0.000366808252563329	0.000168074443313247	EGR1/COL1A1/SMARCA4/FGF2/IGFBP1/SULF2/TGFB1/CD24/TBL1XR1/TIAM1/RSPO2	11	0.240174672489083
BP	GO:0050966	detection of mechanical stimulus involved in sensory perception of pain	3/108	14/18903	6.30621111697803e-05	0.000368785521739492	0.00016898044369285	CXCL12/CXCR4/TNF	3	2.14285714285714
BP	GO:0061043	regulation of vascular wound healing	3/108	14/18903	6.30621111697803e-05	0.000368785521739492	0.00016898044369285	CXCR4/SERPINE1/TNF	3	2.14285714285714
BP	GO:0051056	regulation of small GTPase mediated signal transduction	9/108	305/18903	6.36885106607268e-05	0.000371820613671899	0.000170371146828287	IGF1/NRP1/SOS1/MET/ITGB1/LPAR1/ARF6/TIAM1/NGF	9	0.295081967213115
BP	GO:0032885	regulation of polysaccharide biosynthetic process	4/108	38/18903	6.40423230244717e-05	0.00037325677156687	0.000171029205737868	IGF1/TGFB1/AKT1/IRS1	4	1.05263157894737
BP	GO:0002274	myeloid leukocyte activation	8/108	237/18903	6.50106482630774e-05	0.000378263637456763	0.000173323391300235	FN1/IL6/JUN/PLA2G10/CCL5/PLA2G2A/GATA2/TNF	8	0.337552742616034
BP	GO:0034504	protein localization to nucleus	9/108	306/18903	6.5309630402302e-05	0.000378730218513852	0.00017353718243193	LEP/ELAVL1/COL1A1/PIK3R1/TGFB1/AKT1/PTGS2/SIX1/CDH1	9	0.294117647058824
BP	GO:0071375	cellular response to peptide hormone stimulus	9/108	306/18903	6.5309630402302e-05	0.000378730218513852	0.00017353718243193	GHR/LEP/PIK3R1/GRB2/IGFBP1/PIK3CA/AKT1/IRS1/IL1B	9	0.294117647058824
BP	GO:0031349	positive regulation of defense response	9/108	307/18903	6.69654085284156e-05	0.000387682682818352	0.000177639272403313	IL6/CCR7/SERPINE1/PTGS2/CCL5/PLA2G2A/EMILIN1/IL1B/TNF	9	0.293159609120521
BP	GO:0032635	interleukin-6 production	7/108	176/18903	6.80900307676621e-05	0.000392225767916217	0.00017972094993759	LEP/FOXP3/IL6/HGF/TWIST1/IL1B/TNF	7	0.397727272727273
BP	GO:0032675	regulation of interleukin-6 production	7/108	176/18903	6.80900307676621e-05	0.000392225767916217	0.00017972094993759	LEP/FOXP3/IL6/HGF/TWIST1/IL1B/TNF	7	0.397727272727273
BP	GO:0060538	skeletal muscle organ development	7/108	176/18903	6.80900307676621e-05	0.000392225767916217	0.00017972094993759	EGR1/CYP26B1/PPP3CB/TGFB1/TWIST1/HOXD10/SIX1	7	0.397727272727273
BP	GO:0051101	regulation of DNA binding	6/108	121/18903	6.82584919663588e-05	0.000392543021906203	0.000179866318225743	IGF1/MMP9/JUN/TGFB1/TWIST1/NGF	6	0.495867768595041
BP	GO:0030900	forebrain development	10/108	383/18903	6.88456795565393e-05	0.000395263254767395	0.000181112750443755	CXCL12/FGF2/NRP1/NTRK2/SEMA7A/PROX1/CXCR4/LPAR1/CDH1/GATA2	10	0.261096605744125
BP	GO:0045669	positive regulation of osteoblast differentiation	5/108	75/18903	6.96576364152888e-05	0.000397945111006155	0.000182341598189752	IGF1/FGF2/IL6/HGF/CEBPD	5	0.666666666666667
BP	GO:0050810	regulation of steroid biosynthetic process	5/108	75/18903	6.96576364152888e-05	0.000397945111006155	0.000182341598189752	LEP/EGR1/PROX1/ADM/TNF	5	0.666666666666667
BP	GO:0050818	regulation of coagulation	5/108	75/18903	6.96576364152888e-05	0.000397945111006155	0.000182341598189752	CD9/SERPINE1/SERPINE2/HPSE/EMILIN1	5	0.666666666666667
BP	GO:0001764	neuron migration	7/108	177/18903	7.05640924101991e-05	0.00040245945292275	0.00018441010537097	CXCL12/NRP1/NTRK2/CXCR4/TWIST1/VEGFA/GATA2	7	0.395480225988701
BP	GO:0043618	regulation of transcription from RNA polymerase II promoter in response to stress	4/108	39/18903	7.10488228400407e-05	0.000403231187987247	0.000184763720483074	EPAS1/EGR1/JUN/VEGFA	4	1.02564102564103
BP	GO:0060251	regulation of glial cell proliferation	4/108	39/18903	7.10488228400407e-05	0.000403231187987247	0.000184763720483074	IL6/VEGFC/IL1B/TNF	4	1.02564102564103
BP	GO:0071634	regulation of transforming growth factor beta production	4/108	39/18903	7.10488228400407e-05	0.000403231187987247	0.000184763720483074	FN1/FOXP3/CD24/PTGS2	4	1.02564102564103
BP	GO:0002703	regulation of leukocyte mediated immunity	8/108	241/18903	7.30881745401832e-05	0.000413449771663585	0.000189445956367485	LEP/FOXP3/IL6/PPP3CB/TGFB1/IL1B/GATA2/TNF	8	0.33195020746888
BP	GO:0048738	cardiac muscle tissue development	8/108	241/18903	7.30881745401832e-05	0.000413449771663585	0.000189445956367485	S1PR1/IGF1/FGF2/PROX1/ITGB1/TGFB1/VEGFA/MAPK11	8	0.33195020746888
BP	GO:0002706	regulation of lymphocyte mediated immunity	7/108	179/18903	7.57328427401024e-05	0.000427014823397776	0.000195661570391453	LEP/FOXP3/IL6/PPP3CB/TGFB1/IL1B/TNF	7	0.391061452513967
BP	GO:0090276	regulation of peptide hormone secretion	7/108	179/18903	7.57328427401024e-05	0.000427014823397776	0.000195661570391453	LEP/IL6/PPP3CB/CCL5/IRS1/IL1B/TNF	7	0.391061452513967
BP	GO:0001771	immunological synapse formation	3/108	15/18903	7.85000512167036e-05	0.000438170738221679	0.000200773298823336	CCL21/CCR7/CCL19	3	2
BP	GO:0002468	dendritic cell antigen processing and presentation	3/108	15/18903	7.85000512167036e-05	0.000438170738221679	0.000200773298823336	CCL21/CCR7/CCL19	3	2
BP	GO:0043129	surfactant homeostasis	3/108	15/18903	7.85000512167036e-05	0.000438170738221679	0.000200773298823336	EPAS1/KDR/VEGFA	3	2
BP	GO:0045725	positive regulation of glycogen biosynthetic process	3/108	15/18903	7.85000512167036e-05	0.000438170738221679	0.000200773298823336	IGF1/AKT1/IRS1	3	2
BP	GO:0001953	negative regulation of cell-matrix adhesion	4/108	40/18903	7.85973507901971e-05	0.000438170738221679	0.000200773298823336	CDKN2A/ACVRL1/PIK3R1/SERPINE1	4	1
BP	GO:0010762	regulation of fibroblast migration	4/108	40/18903	7.85973507901971e-05	0.000438170738221679	0.000200773298823336	FGF2/ITGB1/TGFB1/AKT1	4	1
BP	GO:0045923	positive regulation of fatty acid metabolic process	4/108	40/18903	7.85973507901971e-05	0.000438170738221679	0.000200773298823336	TWIST1/PTGS2/IRS1/IL1B	4	1
BP	GO:1903036	positive regulation of response to wounding	5/108	77/18903	7.90229723648073e-05	0.00043983525776039	0.000201535994844753	CXCR4/ITGB1/SERPINE1/HPSE/EMILIN1	5	0.649350649350649
BP	GO:0019932	second-messenger-mediated signaling	9/108	314/18903	7.95770032015535e-05	0.000442208001739612	0.000202623204907901	IGF1/KDR/PPP3CB/CXCR4/CCR7/LPAR1/ADM/VEGFA/TNF	9	0.286624203821656
BP	GO:0061045	negative regulation of wound healing	5/108	78/18903	8.40544993216849e-05	0.000464894842913288	0.00021301849501971	FGF2/CD9/SERPINE1/SERPINE2/TNF	5	0.641025641025641
BP	GO:0002791	regulation of peptide secretion	7/108	182/18903	8.40624412662387e-05	0.000464894842913288	0.00021301849501971	LEP/IL6/PPP3CB/CCL5/IRS1/IL1B/TNF	7	0.384615384615385
BP	GO:0002822	regulation of adaptive immune response based on somatic recombination of immune receptors built from immunoglobulin superfamily domains	7/108	182/18903	8.40624412662387e-05	0.000464894842913288	0.00021301849501971	FOXP3/IL6/PPP3CB/TGFB1/CCL19/IL1B/TNF	7	0.384615384615385
BP	GO:0031667	response to nutrient levels	11/108	474/18903	8.48934790525919e-05	0.000468741984816704	0.000214781285876364	GHR/LEP/COL1A1/POSTN/CYP26B1/PROX1/ADM/AKT1/TBL1XR1/PTGS2/TNF	11	0.232067510548523
BP	GO:0003206	cardiac chamber morphogenesis	6/108	126/18903	8.5480500183514e-05	0.000471231674578544	0.000215922081422319	TEK/ADAMTS1/NRP1/PROX1/SOS1/TGFB1	6	0.476190476190476
BP	GO:0002691	regulation of cellular extravasation	4/108	41/18903	8.67129287379875e-05	0.000476508189350655	0.000218339822235835	LYVE1/CXCL12/CCL21/ITGA4	4	0.975609756097561
BP	GO:1905314	semi-lunar valve development	4/108	41/18903	8.67129287379875e-05	0.000476508189350655	0.000218339822235835	TIE1/TGFB1/TWIST1/EMILIN1	4	0.975609756097561
BP	GO:0030073	insulin secretion	7/108	183/18903	8.69995115946058e-05	0.000477325371062639	0.000218714261361366	LEP/IL6/PPP3CB/CCL5/IRS1/IL1B/TNF	7	0.382513661202186
BP	GO:0042593	glucose homeostasis	8/108	248/18903	8.92289741796421e-05	0.000487786969601265	0.00022350784857828	LEP/SMARCA4/PIK3R1/IL6/PPP3CB/PIK3CA/AKT1/IRS1	8	0.32258064516129
BP	GO:0001704	formation of primary germ layer	6/108	127/18903	8.9306946134538e-05	0.000487786969601265	0.00022350784857828	FN1/MMP9/EPHA2/GRB2/ITGB1/ITGA4	6	0.47244094488189
BP	GO:0048844	artery morphogenesis	5/108	79/18903	8.93289828790301e-05	0.000487786969601265	0.00022350784857828	NRP1/ACVRL1/PROX1/VEGFA/SIX1	5	0.632911392405063
BP	GO:0032640	tumor necrosis factor production	7/108	184/18903	9.00197600907992e-05	0.000489243970854547	0.000224175458079541	LEP/FOXP3/IGF1/PIK3R1/IL6/TWIST1/CCL19	7	0.380434782608696
BP	GO:0032680	regulation of tumor necrosis factor production	7/108	184/18903	9.00197600907992e-05	0.000489243970854547	0.000224175458079541	LEP/FOXP3/IGF1/PIK3R1/IL6/TWIST1/CCL19	7	0.380434782608696
BP	GO:0090087	regulation of peptide transport	7/108	184/18903	9.00197600907992e-05	0.000489243970854547	0.000224175458079541	LEP/IL6/PPP3CB/CCL5/IRS1/IL1B/TNF	7	0.380434782608696
BP	GO:0033500	carbohydrate homeostasis	8/108	249/18903	9.17591783838127e-05	0.000497915792421253	0.000228148955328173	LEP/SMARCA4/PIK3R1/IL6/PPP3CB/PIK3CA/AKT1/IRS1	8	0.321285140562249
BP	GO:0071230	cellular response to amino acid stimulus	5/108	80/18903	9.48543724012627e-05	0.000512166296325835	0.000234678648959541	COL1A1/NTRK2/COL1A2/SIX1/TNF	5	0.625
BP	GO:0032735	positive regulation of interleukin-12 production	4/108	42/18903	9.54209304246573e-05	0.000512166296325835	0.000234678648959541	LEP/CCR7/MAPK11/CCL19	4	0.952380952380952
BP	GO:0045429	positive regulation of nitric oxide biosynthetic process	4/108	42/18903	9.54209304246573e-05	0.000512166296325835	0.000234678648959541	AKT1/PTGS2/IL1B/TNF	4	0.952380952380952
BP	GO:0050999	regulation of nitric-oxide synthase activity	4/108	42/18903	9.54209304246573e-05	0.000512166296325835	0.000234678648959541	LEP/AKT1/IL1B/TNF	4	0.952380952380952
BP	GO:0071542	dopaminergic neuron differentiation	4/108	42/18903	9.54209304246573e-05	0.000512166296325835	0.000234678648959541	VEGFD/VEGFA/TIAM1/RSPO2	4	0.952380952380952
BP	GO:0071604	transforming growth factor beta production	4/108	42/18903	9.54209304246573e-05	0.000512166296325835	0.000234678648959541	FN1/FOXP3/CD24/PTGS2	4	0.952380952380952
BP	GO:2000403	positive regulation of lymphocyte migration	4/108	42/18903	9.54209304246573e-05	0.000512166296325835	0.000234678648959541	CXCL12/CCL21/CCL5/ITGA4	4	0.952380952380952
BP	GO:0030214	hyaluronan catabolic process	3/108	16/18903	9.62140349366094e-05	0.000512998877598466	0.000235060144285593	LYVE1/FGF2/TGFB1	3	1.875
BP	GO:0070875	positive regulation of glycogen metabolic process	3/108	16/18903	9.62140349366094e-05	0.000512998877598466	0.000235060144285593	IGF1/AKT1/IRS1	3	1.875
BP	GO:1901201	regulation of extracellular matrix assembly	3/108	16/18903	9.62140349366094e-05	0.000512998877598466	0.000235060144285593	TIE1/TGFB1/EMILIN1	3	1.875
BP	GO:1903799	negative regulation of miRNA maturation	3/108	16/18903	9.62140349366094e-05	0.000512998877598466	0.000235060144285593	IL6/TGFB1/TNF	3	1.875
BP	GO:0009266	response to temperature stimulus	7/108	186/18903	9.6316946978337e-05	0.000512998877598466	0.000235060144285593	SCARA5/CXCL12/IGF1/CXCR4/ADM/AKT1/PTGS2	7	0.376344086021505
BP	GO:0014902	myotube differentiation	6/108	129/18903	9.73688475559783e-05	0.000517010659875455	0.000236898374663964	IGF1/CYP26B1/CD9/PPP3CB/ITGB1/SIX1	6	0.465116279069767
BP	GO:0048593	camera-type eye morphogenesis	6/108	129/18903	9.73688475559783e-05	0.000517010659875455	0.000236898374663964	KDR/NTRK2/PROX1/EPHA2/TWIST1/VEGFA	6	0.465116279069767
BP	GO:0002700	regulation of production of molecular mediator of immune response	7/108	187/18903	9.95975252297491e-05	0.000528034659028164	0.000241949658291661	FOXP3/IL6/SEMA7A/TGFB1/TWIST1/IL1B/TNF	7	0.374331550802139
BP	GO:0007422	peripheral nervous system development	5/108	81/18903	0.000100638745486608	0.000532739047208927	0.000244105246174664	NTRK2/ERBB2/AKT1/HOXD10/NGF	5	0.617283950617284
BP	GO:0032612	interleukin-1 production	6/108	130/18903	0.000101611278789378	0.000536247328001261	0.000245712768189334	EGR1/IGF1/IL6/CCR7/CCL19/TNF	6	0.461538461538462
BP	GO:0032652	regulation of interleukin-1 production	6/108	130/18903	0.000101611278789378	0.000536247328001261	0.000245712768189334	EGR1/IGF1/IL6/CCR7/CCL19/TNF	6	0.461538461538462
BP	GO:0034612	response to tumor necrosis factor	8/108	254/18903	0.000105320460293052	0.000554976306749688	0.000254294534425425	COL1A1/CCL21/AKT1/PTGS2/CCL5/CCL19/NKX3-1/TNF	8	0.31496062992126
BP	GO:0007565	female pregnancy	7/108	189/18903	0.000106431938655731	0.000558283896403243	0.000255810098172546	LEP/MMP9/ADM/AKT1/VEGFA/PTGS2/IL1B	7	0.37037037037037
BP	GO:0071706	tumor necrosis factor superfamily cytokine production	7/108	189/18903	0.000106431938655731	0.000558283896403243	0.000255810098172546	LEP/FOXP3/IGF1/PIK3R1/IL6/TWIST1/CCL19	7	0.37037037037037
BP	GO:1903555	regulation of tumor necrosis factor superfamily cytokine production	7/108	189/18903	0.000106431938655731	0.000558283896403243	0.000255810098172546	LEP/FOXP3/IGF1/PIK3R1/IL6/TWIST1/CCL19	7	0.37037037037037
BP	GO:0051149	positive regulation of muscle cell differentiation	5/108	82/18903	0.000106690307186686	0.000558792501483064	0.000256043145043929	IGF1/CYP26B1/PROX1/TGFB1/MAPK11	5	0.609756097560976
BP	GO:0014032	neural crest cell development	5/108	83/18903	0.000113017389194078	0.000591036557990781	0.00027081762683332	FN1/NRP1/SEMA7A/TWIST1/SEMA4D	5	0.602409638554217
BP	GO:0006913	nucleocytoplasmic transport	9/108	329/18903	0.000113440845539485	0.00059146416755677	0.000271013560919472	LEP/ELAVL1/PTPN14/PIK3R1/TGFB1/AKT1/PTGS2/IL1B/CDH1	9	0.273556231003039
BP	GO:0051169	nuclear transport	9/108	329/18903	0.000113440845539485	0.00059146416755677	0.000271013560919472	LEP/ELAVL1/PTPN14/PIK3R1/TGFB1/AKT1/PTGS2/IL1B/CDH1	9	0.273556231003039
BP	GO:0055001	muscle cell development	7/108	191/18903	0.000113643371638278	0.000591629101671755	0.000271089135035828	IGF1/PROX1/PPP3CB/ITGB1/ADM/VEGFA/SIX1	7	0.366492146596859
BP	GO:0010828	positive regulation of glucose transmembrane transport	4/108	44/18903	0.000114717383067095	0.000594538293680062	0.00027242214982999	IGF1/PIK3R1/AKT1/IRS1	4	0.909090909090909
BP	GO:0032881	regulation of polysaccharide metabolic process	4/108	44/18903	0.000114717383067095	0.000594538293680062	0.00027242214982999	IGF1/TGFB1/AKT1/IRS1	4	0.909090909090909
BP	GO:1904407	positive regulation of nitric oxide metabolic process	4/108	44/18903	0.000114717383067095	0.000594538293680062	0.00027242214982999	AKT1/PTGS2/IL1B/TNF	4	0.909090909090909
BP	GO:0010763	positive regulation of fibroblast migration	3/108	17/18903	0.00011634604060807	0.000596725914940946	0.000273424535199004	ITGB1/TGFB1/AKT1	3	1.76470588235294
BP	GO:0031649	heat generation	3/108	17/18903	0.00011634604060807	0.000596725914940946	0.000273424535199004	PTGS2/IL1B/TNF	3	1.76470588235294
BP	GO:0033631	cell-cell adhesion mediated by integrin	3/108	17/18903	0.00011634604060807	0.000596725914940946	0.000273424535199004	ITGB1/CCL5/ITGA4	3	1.76470588235294
BP	GO:0048875	chemical homeostasis within a tissue	3/108	17/18903	0.00011634604060807	0.000596725914940946	0.000273424535199004	EPAS1/KDR/VEGFA	3	1.76470588235294
BP	GO:1901550	regulation of endothelial cell development	3/108	17/18903	0.00011634604060807	0.000596725914940946	0.000273424535199004	VEGFA/IL1B/TNF	3	1.76470588235294
BP	GO:1903140	regulation of establishment of endothelial barrier	3/108	17/18903	0.00011634604060807	0.000596725914940946	0.000273424535199004	VEGFA/IL1B/TNF	3	1.76470588235294
BP	GO:1903236	regulation of leukocyte tethering or rolling	3/108	17/18903	0.00011634604060807	0.000596725914940946	0.000273424535199004	CXCL12/CCL21/ITGA4	3	1.76470588235294
BP	GO:0046578	regulation of Ras protein signal transduction	7/108	193/18903	0.000121247391867825	0.000620944483204749	0.000284521674781707	IGF1/NRP1/MET/ITGB1/LPAR1/ARF6/NGF	7	0.362694300518135
BP	GO:0009895	negative regulation of catabolic process	9/108	332/18903	0.000121490363633618	0.000621269776808844	0.000284670726884651	LEP/ELAVL1/MET/PIK3CA/AKT1/HGF/SERPINE2/IL1B/TNF	9	0.271084337349398
BP	GO:0035270	endocrine system development	6/108	135/18903	0.000125082467016429	0.000633562309965297	0.000290303262828819	FGF2/IL6/AKT1/SIX1/CDH1/GATA2	6	0.444444444444444
BP	GO:0042476	odontogenesis	6/108	135/18903	0.000125082467016429	0.000633562309965297	0.000290303262828819	COL1A1/COL1A2/ADM/TWIST1/SERPINE1/RSPO2	6	0.444444444444444
BP	GO:1900180	regulation of protein localization to nucleus	6/108	135/18903	0.000125082467016429	0.000633562309965297	0.000290303262828819	LEP/PIK3R1/TGFB1/AKT1/PTGS2/CDH1	6	0.444444444444444
BP	GO:0031345	negative regulation of cell projection organization	7/108	194/18903	0.000125201598828324	0.000633562309965297	0.000290303262828819	NRP1/SEMA7A/CCL21/LPAR1/ARF6/SEMA4D/CDH1	7	0.360824742268041
BP	GO:0010712	regulation of collagen metabolic process	4/108	45/18903	0.000125358227130626	0.000633562309965297	0.000290303262828819	IL6/ITGB1/TGFB1/EMILIN1	4	0.888888888888889
BP	GO:0030517	negative regulation of axon extension	4/108	45/18903	0.000125358227130626	0.000633562309965297	0.000290303262828819	NRP1/SEMA7A/SEMA4D/CDH1	4	0.888888888888889
BP	GO:0060964	regulation of miRNA-mediated gene silencing	4/108	45/18903	0.000125358227130626	0.000633562309965297	0.000290303262828819	ELAVL1/IL6/TGFB1/TNF	4	0.888888888888889
BP	GO:1900744	regulation of p38MAPK cascade	4/108	45/18903	0.000125358227130626	0.000633562309965297	0.000290303262828819	LEP/HGF/VEGFA/IL1B	4	0.888888888888889
BP	GO:0008625	extrinsic apoptotic signaling pathway via death domain receptors	5/108	85/18903	0.000126532069014124	0.000636706428672816	0.000291743922895173	PIK3R1/HGF/SERPINE1/NGF/TNF	5	0.588235294117647
BP	GO:0034103	regulation of tissue remodeling	5/108	85/18903	0.000126532069014124	0.000636706428672816	0.000291743922895173	LEP/S1PR1/FLT4/IL6/TGFB1	5	0.588235294117647
BP	GO:0048041	focal adhesion assembly	5/108	85/18903	0.000126532069014124	0.000636706428672816	0.000291743922895173	TEK/NRP1/ACVRL1/KDR/VEGFA	5	0.588235294117647
BP	GO:0002699	positive regulation of immune effector process	8/108	261/18903	0.000127060112279647	0.000637510302481359	0.000292112264234063	FOXP3/IL6/SEMA7A/TGFB1/CCL19/IL1B/GATA2/TNF	8	0.306513409961686
BP	GO:0071216	cellular response to biotic stimulus	8/108	261/18903	0.000127060112279647	0.000637510302481359	0.000292112264234063	IL6/IL24/TGFB1/AKT1/SERPINE1/CCL5/IL1B/TNF	8	0.306513409961686
BP	GO:1903706	regulation of hemopoiesis	10/108	413/18903	0.000128093599164897	0.000641765615497647	0.000294062082323863	FOXP3/SMARCA4/CYP26B1/PIK3R1/SOS1/ERBB2/TGFB1/CCL19/GATA2/TNF	10	0.242130750605327
BP	GO:0071214	cellular response to abiotic stimulus	9/108	335/18903	0.000130013199993982	0.00064950317226431	0.000297607492049717	EGR1/COL1A1/FGF2/PIK3R1/MMP9/GRB2/PIK3CA/PTGS2/IL1B	9	0.26865671641791
BP	GO:0104004	cellular response to environmental stimulus	9/108	335/18903	0.000130013199993982	0.00064950317226431	0.000297607492049717	EGR1/COL1A1/FGF2/PIK3R1/MMP9/GRB2/PIK3CA/PTGS2/IL1B	9	0.26865671641791
BP	GO:0033077	T cell differentiation in thymus	5/108	86/18903	0.000133736955673707	0.000666183223801975	0.000305250423627832	FOXP3/SOS1/ERBB2/CCR7/IL1B	5	0.581395348837209
BP	GO:0033273	response to vitamin	5/108	86/18903	0.000133736955673707	0.000666183223801975	0.000305250423627832	LEP/COL1A1/POSTN/CYP26B1/PTGS2	5	0.581395348837209
BP	GO:0085029	extracellular matrix assembly	4/108	46/18903	0.000136696256627437	0.000678970502789366	0.000311109656025898	TIE1/COL1A2/TGFB1/EMILIN1	4	0.869565217391304
BP	GO:1990090	cellular response to nerve growth factor stimulus	4/108	46/18903	0.000136696256627437	0.000678970502789366	0.000311109656025898	NTRK2/ARF6/AKT1/NGF	4	0.869565217391304
BP	GO:0150078	positive regulation of neuroinflammatory response	3/108	18/18903	0.000139035462665915	0.000688613407366806	0.000315528111192732	IL6/IL1B/TNF	3	1.66666666666667
BP	GO:2000811	negative regulation of anoikis	3/108	18/18903	0.000139035462665915	0.000688613407366806	0.000315528111192732	NTRK2/ITGB1/PIK3CA	3	1.66666666666667
BP	GO:0001892	embryonic placenta development	5/108	87/18903	0.000141251938498967	0.000695610542081683	0.000318734253676638	EPAS1/GRB2/ADM/AKT1/GATA2	5	0.574712643678161
BP	GO:0008543	fibroblast growth factor receptor signaling pathway	5/108	87/18903	0.000141251938498967	0.000695610542081683	0.000318734253676638	FGF2/FGFR3/SOS1/GRB2/SULF2	5	0.574712643678161
BP	GO:0010507	negative regulation of autophagy	5/108	87/18903	0.000141251938498967	0.000695610542081683	0.000318734253676638	LEP/MET/PIK3CA/AKT1/HGF	5	0.574712643678161
BP	GO:0019915	lipid storage	5/108	87/18903	0.000141251938498967	0.000695610542081683	0.000318734253676638	LEP/IL6/PLA2G10/IL1B/TNF	5	0.574712643678161
BP	GO:0002819	regulation of adaptive immune response	7/108	198/18903	0.000142080872402683	0.000698698835593876	0.000320149334196835	FOXP3/IL6/PPP3CB/TGFB1/CCL19/IL1B/TNF	7	0.353535353535354
BP	GO:0051091	positive regulation of DNA-binding transcription factor activity	8/108	266/18903	0.000144757727876492	0.000710852842423282	0.000325718396282005	SMARCA4/IL6/ZIC2/AKT1/VEGFA/NKX3-1/IL1B/TNF	8	0.300751879699248
BP	GO:0032388	positive regulation of intracellular transport	7/108	199/18903	0.000146576804328155	0.000718766142470355	0.000329344332969329	LEP/PIK3R1/ERBB2/TGFB1/PTGS2/IL1B/CDH1	7	0.351758793969849
BP	GO:0072175	epithelial tube formation	6/108	139/18903	0.000146796048440665	0.00071882308302911	0.000329370423583833	FGF2/PROX1/TGFB1/ADM/TWIST1/SIX1	6	0.431654676258993
BP	GO:0002701	negative regulation of production of molecular mediator of immune response	4/108	47/18903	0.00014875841735619	0.000724334234721702	0.000331895676890634	FOXP3/TGFB1/TWIST1/TNF	4	0.851063829787234
BP	GO:0045601	regulation of endothelial cell differentiation	4/108	47/18903	0.00014875841735619	0.000724334234721702	0.000331895676890634	ACVRL1/VEGFA/IL1B/TNF	4	0.851063829787234
BP	GO:0090199	regulation of release of cytochrome c from mitochondria	4/108	47/18903	0.00014875841735619	0.000724334234721702	0.000331895676890634	IGF1/MMP9/AKT1/HGF	4	0.851063829787234
BP	GO:1900368	regulation of post-transcriptional gene silencing by RNA	4/108	47/18903	0.00014875841735619	0.000724334234721702	0.000331895676890634	ELAVL1/IL6/TGFB1/TNF	4	0.851063829787234
BP	GO:0046889	positive regulation of lipid biosynthetic process	5/108	88/18903	0.00014908596913938	0.000724909585899625	0.000332159307352226	ADM/AKT1/PTGS2/IL1B/TNF	5	0.568181818181818
BP	GO:0046849	bone remodeling	5/108	89/18903	0.000157248120385358	0.000763524534045035	0.000349852982093061	LEP/S1PR1/IL6/EPHA2/TGFB1	5	0.561797752808989
BP	GO:0046328	regulation of JNK cascade	6/108	141/18903	0.000158717979759566	0.000769582137153527	0.000352628623761855	FLT4/CCL21/CCR7/CCL19/IL1B/TNF	6	0.425531914893617
BP	GO:0003018	vascular process in circulatory system	8/108	270/18903	0.000160338776555994	0.000776353628583011	0.000355731374707226	LEP/TEK/ITGA1/TGFB1/ADM/VEGFA/PTGS2/TNF	8	0.296296296296296
BP	GO:0001974	blood vessel remodeling	4/108	48/18903	0.000161571933412476	0.000776891713158323	0.000355977929316669	EPAS1/ACVRL1/FLT4/TGFB1	4	0.833333333333333
BP	GO:0031641	regulation of myelination	4/108	48/18903	0.000161571933412476	0.000776891713158323	0.000355977929316669	TYMP/AKT1/HGF/TNF	4	0.833333333333333
BP	GO:0060147	regulation of post-transcriptional gene silencing	4/108	48/18903	0.000161571933412476	0.000776891713158323	0.000355977929316669	ELAVL1/IL6/TGFB1/TNF	4	0.833333333333333
BP	GO:0060976	coronary vasculature development	4/108	48/18903	0.000161571933412476	0.000776891713158323	0.000355977929316669	FGF2/NRP1/VEGFB/VEGFA	4	0.833333333333333
BP	GO:1990089	response to nerve growth factor	4/108	48/18903	0.000161571933412476	0.000776891713158323	0.000355977929316669	NTRK2/ARF6/AKT1/NGF	4	0.833333333333333
BP	GO:0002544	chronic inflammatory response	3/108	19/18903	0.000164419140956999	0.000788392058162232	0.000361247478381977	FOXP3/CCL5/TNF	3	1.57894736842105
BP	GO:0060977	coronary vasculature morphogenesis	3/108	19/18903	0.000164419140956999	0.000788392058162232	0.000361247478381977	FGF2/NRP1/VEGFA	3	1.57894736842105
BP	GO:0010977	negative regulation of neuron projection development	6/108	142/18903	0.000164959507363137	0.000788798086313785	0.000361433523693294	NRP1/SEMA7A/LPAR1/ARF6/SEMA4D/CDH1	6	0.422535211267606
BP	GO:0051384	response to glucocorticoid	6/108	142/18903	0.000164959507363137	0.000788798086313785	0.000361433523693294	GHR/IL6/PIK3CA/ADM/PTGS2/TNF	6	0.422535211267606
BP	GO:0060191	regulation of lipase activity	5/108	90/18903	0.000165747585154868	0.000791473296284351	0.000362659326066623	FGF2/FGFR3/FLT1/LPAR1/CCL5	5	0.555555555555556
BP	GO:0000302	response to reactive oxygen species	7/108	204/18903	0.00017082175996389	0.0008134593301169	0.000372733500710319	COL1A1/MMP9/IL6/JUN/MET/AKT1/HGF	7	0.343137254901961
BP	GO:0031032	actomyosin structure organization	7/108	204/18903	0.00017082175996389	0.0008134593301169	0.000372733500710319	S1PR1/NRP1/PIK3R1/PROX1/MET/ITGB1/LPAR1	7	0.343137254901961
BP	GO:0001942	hair follicle development	5/108	91/18903	0.000174593675454486	0.000828440971770577	0.000379598207442689	SOS1/PLA2G10/SOX18/HPSE/TNF	5	0.549450549450549
BP	GO:0033628	regulation of cell adhesion mediated by integrin	4/108	49/18903	0.000175164295591006	0.000828440971770577	0.000379598207442689	EPHA2/CCL21/SERPINE1/CCL5	4	0.816326530612245
BP	GO:0035987	endodermal cell differentiation	4/108	49/18903	0.000175164295591006	0.000828440971770577	0.000379598207442689	FN1/MMP9/GRB2/ITGA4	4	0.816326530612245
BP	GO:0043114	regulation of vascular permeability	4/108	49/18903	0.000175164295591006	0.000828440971770577	0.000379598207442689	TEK/TGFB1/ADM/VEGFA	4	0.816326530612245
BP	GO:2000404	regulation of T cell migration	4/108	49/18903	0.000175164295591006	0.000828440971770577	0.000379598207442689	CXCL12/CCL21/CCL5/ITGA4	4	0.816326530612245
BP	GO:0001894	tissue homeostasis	8/108	275/18903	0.000181734567663173	0.000858342528308191	0.000393299337213185	EPAS1/S1PR1/IL6/KDR/ITGB1/VEGFA/PTGS2/GATA2	8	0.290909090909091
BP	GO:0032273	positive regulation of protein polymerization	5/108	92/18903	0.000183795821315661	0.00086571582774805	0.00039667784135009	MET/GRB2/CCL21/CCR7/ARF6	5	0.543478260869565
BP	GO:0097581	lamellipodium organization	5/108	92/18903	0.000183795821315661	0.00086571582774805	0.00039667784135009	S1PR1/PIK3R1/EPHA2/ITGB1/PIK3CA	5	0.543478260869565
BP	GO:0009410	response to xenobiotic stimulus	10/108	432/18903	0.000184481320481188	0.000867764037372109	0.000397616347204162	COL1A1/CYP26B1/JUN/CXCR4/VEGFC/PTGS2/NKX3-1/IL1B/CDH1/TNF	10	0.231481481481481
BP	GO:0034284	response to monosaccharide	7/108	207/18903	0.000186862255640052	0.00087777086706358	0.000402201555737424	LEP/EGR1/SMARCA4/PPP3CB/PIK3CA/PTGS2/TNF	7	0.338164251207729
BP	GO:0060966	regulation of gene silencing by RNA	4/108	50/18903	0.000189563249972182	0.000889251993771941	0.000407462298827667	ELAVL1/IL6/TGFB1/TNF	4	0.8
BP	GO:0006979	response to oxidative stress	10/108	434/18903	0.00019147683709528	0.000897013274727818	0.000411018579164712	EPAS1/COL1A1/MMP9/IL6/JUN/MET/AKT1/HGF/PTGS2/TNF	10	0.230414746543779
BP	GO:0045216	cell-cell junction organization	7/108	208/18903	0.000192471953633347	0.000897563756706232	0.000411270814362337	CD9/EPHA2/TGFB1/VEGFA/IL1B/CDH1/TNF	7	0.336538461538462
BP	GO:0002577	regulation of antigen processing and presentation	3/108	20/18903	0.000192631389726381	0.000897563756706232	0.000411270814362337	CCL21/CCR7/CCL19	3	1.5
BP	GO:0014856	skeletal muscle cell proliferation	3/108	20/18903	0.000192631389726381	0.000897563756706232	0.000411270814362337	FGF2/HGF/SIX1	3	1.5
BP	GO:0031998	regulation of fatty acid beta-oxidation	3/108	20/18903	0.000192631389726381	0.000897563756706232	0.000411270814362337	AKT1/TWIST1/IRS1	3	1.5
BP	GO:0044070	regulation of anion transport	5/108	93/18903	0.000193363569706906	0.000898556615201754	0.000411725749979946	LEP/PLA2G10/ITGB1/IL1B/TNF	5	0.537634408602151
BP	GO:0045666	positive regulation of neuron differentiation	5/108	93/18903	0.000193363569706906	0.000898556615201754	0.000411725749979946	CXCL12/FGF2/PROX1/NGF/GATA2	5	0.537634408602151
BP	GO:0030100	regulation of endocytosis	7/108	209/18903	0.000198217069655094	0.000919875998855142	0.000421494460237374	PPP3CB/CCL21/ARF6/VEGFA/SERPINE1/CCL19/GATA2	7	0.334928229665072
BP	GO:0022404	molting cycle process	5/108	94/18903	0.000203306583422665	0.000938463189079022	0.000430011257849763	SOS1/PLA2G10/SOX18/HPSE/TNF	5	0.531914893617021
BP	GO:0022405	hair cycle process	5/108	94/18903	0.000203306583422665	0.000938463189079022	0.000430011257849763	SOS1/PLA2G10/SOX18/HPSE/TNF	5	0.531914893617021
BP	GO:0051492	regulation of stress fiber assembly	5/108	94/18903	0.000203306583422665	0.000938463189079022	0.000430011257849763	S1PR1/NRP1/PIK3R1/MET/LPAR1	5	0.531914893617021
BP	GO:1903035	negative regulation of response to wounding	5/108	94/18903	0.000203306583422665	0.000938463189079022	0.000430011257849763	FGF2/CD9/SERPINE1/SERPINE2/TNF	5	0.531914893617021
BP	GO:0030225	macrophage differentiation	4/108	51/18903	0.000204796786690908	0.000940326890615285	0.000430865220638279	MMP9/TGFB1/VEGFA/GATA2	4	0.784313725490196
BP	GO:0050873	brown fat cell differentiation	4/108	51/18903	0.000204796786690908	0.000940326890615285	0.000430865220638279	LEP/PTGS2/SIX1/GATA2	4	0.784313725490196
BP	GO:0050982	detection of mechanical stimulus	4/108	51/18903	0.000204796786690908	0.000940326890615285	0.000430865220638279	CXCL12/CXCR4/SERPINE2/TNF	4	0.784313725490196
BP	GO:0060688	regulation of morphogenesis of a branching structure	4/108	51/18903	0.000204796786690908	0.000940326890615285	0.000430865220638279	HGF/VEGFA/SIX1/TNF	4	0.784313725490196
BP	GO:0032147	activation of protein kinase activity	6/108	148/18903	0.00020660429945118	0.00094736964860925	0.00043409226806961	GHR/LEP/IGF1/PIK3CA/VEGFA/CCL5	6	0.405405405405405
BP	GO:0034109	homotypic cell-cell adhesion	5/108	95/18903	0.000213634639949564	0.000975729714387058	0.00044708707457852	FN1/IL6/CD9/SERPINE2/CCL5	5	0.526315789473684
BP	GO:0098773	skin epidermis development	5/108	95/18903	0.000213634639949564	0.000975729714387058	0.00044708707457852	SOS1/PLA2G10/SOX18/HPSE/TNF	5	0.526315789473684
BP	GO:1903510	mucopolysaccharide metabolic process	5/108	95/18903	0.000213634639949564	0.000975729714387058	0.00044708707457852	LYVE1/FGF2/TGFB1/HPSE/IL1B	5	0.526315789473684
BP	GO:0046622	positive regulation of organ growth	4/108	52/18903	0.000220893128885522	0.00100755205823673	0.000461668324291633	IGF1/FGF2/PROX1/AKT1	4	0.769230769230769
BP	GO:0030010	establishment of cell polarity	6/108	150/18903	0.000222189700612373	0.00101080255390281	0.000463157727121994	CYP26B1/CCL21/CCR7/ITGB1/ARF6/CCL19	6	0.4
BP	GO:0034614	cellular response to reactive oxygen species	6/108	150/18903	0.000222189700612373	0.00101080255390281	0.000463157727121994	MMP9/IL6/JUN/MET/AKT1/HGF	6	0.4
BP	GO:0010829	negative regulation of glucose transmembrane transport	3/108	21/18903	0.000223804026336115	0.00101268072507925	0.000464018320014117	LEP/IL1B/TNF	3	1.42857142857143
BP	GO:0060445	branching involved in salivary gland morphogenesis	3/108	21/18903	0.000223804026336115	0.00101268072507925	0.000464018320014117	NRP1/HGF/TNF	3	1.42857142857143
BP	GO:0090026	positive regulation of monocyte chemotaxis	3/108	21/18903	0.000223804026336115	0.00101268072507925	0.000464018320014117	CXCL12/SERPINE1/CCL5	3	1.42857142857143
BP	GO:0090201	negative regulation of release of cytochrome c from mitochondria	3/108	21/18903	0.000223804026336115	0.00101268072507925	0.000464018320014117	IGF1/AKT1/HGF	3	1.42857142857143
BP	GO:0019217	regulation of fatty acid metabolic process	5/108	96/18903	0.000224357630310741	0.00101268072507925	0.000464018320014117	AKT1/TWIST1/PTGS2/IRS1/IL1B	5	0.520833333333333
BP	GO:0045807	positive regulation of endocytosis	5/108	96/18903	0.000224357630310741	0.00101268072507925	0.000464018320014117	CCL21/VEGFA/SERPINE1/CCL19/GATA2	5	0.520833333333333
BP	GO:0071456	cellular response to hypoxia	6/108	151/18903	0.000230322229246373	0.00103824942402467	0.00047573410015664	EPAS1/EGR1/TWIST1/VEGFA/PTGS2/NKX3-1	6	0.397350993377483
BP	GO:0072659	protein localization to plasma membrane	8/108	285/18903	0.000231603843303646	0.00104244899020479	0.000477658374605073	PIK3R1/EPHA2/ITGB1/ARF6/TGFB1/AKT1/CDH1/TNF	8	0.280701754385965
BP	GO:0008544	epidermis development	9/108	362/18903	0.000231856072344798	0.00104244899020479	0.000477658374605073	FGF2/CYP26B1/SOS1/EPHA2/PLA2G10/SOX18/LAMC2/HPSE/TNF	9	0.248618784530387
BP	GO:0030838	positive regulation of actin filament polymerization	4/108	53/18903	0.000237880721824744	0.00106400912009982	0.000487537396695076	GRB2/CCL21/CCR7/ARF6	4	0.754716981132075
BP	GO:0048260	positive regulation of receptor-mediated endocytosis	4/108	53/18903	0.000237880721824744	0.00106400912009982	0.000487537396695076	CCL21/VEGFA/SERPINE1/CCL19	4	0.754716981132075
BP	GO:0051155	positive regulation of striated muscle cell differentiation	4/108	53/18903	0.000237880721824744	0.00106400912009982	0.000487537396695076	IGF1/CYP26B1/PROX1/TGFB1	4	0.754716981132075
BP	GO:0071622	regulation of granulocyte chemotaxis	4/108	53/18903	0.000237880721824744	0.00106400912009982	0.000487537396695076	CCL21/CCR7/CCL5/CCL19	4	0.754716981132075
BP	GO:0050804	modulation of chemical synaptic transmission	10/108	448/18903	0.000246988006308035	0.00110040999521649	0.00050421656565759	NTRK2/PPP3CB/ITGB1/SERPINE2/PTGS2/RETN/IL1B/CDH1/NGF/TNF	10	0.223214285714286
BP	GO:0060349	bone morphogenesis	5/108	98/18903	0.000247028537229304	0.00110040999521649	0.00050421656565759	GHR/COL1A1/CYP26B1/FGFR3/TWIST1	5	0.510204081632653
BP	GO:0120162	positive regulation of cold-induced thermogenesis	5/108	98/18903	0.000247028537229304	0.00110040999521649	0.00050421656565759	EPAS1/LEP/CXCR4/VEGFA/LCN2	5	0.510204081632653
BP	GO:0030902	hindbrain development	6/108	153/18903	0.000247290287775398	0.00110040999521649	0.00050421656565759	FGF2/PROX1/ITGB1/LPAR1/SERPINE2/GATA2	6	0.392156862745098
BP	GO:0034599	cellular response to oxidative stress	8/108	288/18903	0.000248581974003636	0.00110473786136148	0.000506199628164962	EPAS1/MMP9/IL6/JUN/MET/AKT1/HGF/TNF	8	0.277777777777778
BP	GO:0099177	regulation of trans-synaptic signaling	10/108	449/18903	0.000251422520991553	0.00111592918932405	0.000511327583177153	NTRK2/PPP3CB/ITGB1/SERPINE2/PTGS2/RETN/IL1B/CDH1/NGF/TNF	10	0.22271714922049
BP	GO:0043270	positive regulation of ion transport	8/108	289/18903	0.000254463074805155	0.00112797844427074	0.000516848647120922	LEP/CXCL12/PPP3CB/PLA2G10/ITGB1/AKT1/CCL5/IL1B	8	0.27681660899654
BP	GO:0010883	regulation of lipid storage	4/108	54/18903	0.000255788222210578	0.00112951380777171	0.000517552162824035	LEP/IL6/PLA2G10/TNF	4	0.740740740740741
BP	GO:0014009	glial cell proliferation	4/108	54/18903	0.000255788222210578	0.00112951380777171	0.000517552162824035	IL6/VEGFC/IL1B/TNF	4	0.740740740740741
BP	GO:0061900	glial cell activation	4/108	54/18903	0.000255788222210578	0.00112951380777171	0.000517552162824035	IL6/JUN/IL1B/TNF	4	0.740740740740741
BP	GO:0002070	epithelial cell maturation	3/108	22/18903	0.000258066399718842	0.00113091883016029	0.00051819595519826	EPAS1/KDR/GATA2	3	1.36363636363636
BP	GO:0010888	negative regulation of lipid storage	3/108	22/18903	0.000258066399718842	0.00113091883016029	0.00051819595519826	LEP/IL6/TNF	3	1.36363636363636
BP	GO:0030728	ovulation	3/108	22/18903	0.000258066399718842	0.00113091883016029	0.00051819595519826	LEP/ADAMTS1/PTGS2	3	1.36363636363636
BP	GO:0032891	negative regulation of organic acid transport	3/108	22/18903	0.000258066399718842	0.00113091883016029	0.00051819595519826	LEP/AKT1/TNF	3	1.36363636363636
BP	GO:0070886	positive regulation of calcineurin-NFAT signaling cascade	3/108	22/18903	0.000258066399718842	0.00113091883016029	0.00051819595519826	IGF1/PPP3CB/TNF	3	1.36363636363636
BP	GO:0106058	positive regulation of calcineurin-mediated signaling	3/108	22/18903	0.000258066399718842	0.00113091883016029	0.00051819595519826	IGF1/PPP3CB/TNF	3	1.36363636363636
BP	GO:0032755	positive regulation of interleukin-6 production	5/108	99/18903	0.00025899679282171	0.00113356118425886	0.000519406702751105	LEP/IL6/TWIST1/IL1B/TNF	5	0.505050505050505
BP	GO:0046942	carboxylic acid transport	8/108	290/18903	0.000260457781063991	0.00113851620965093	0.000521677134587234	LEP/NTRK2/PLA2G10/ITGB1/PTGS2/PLA2G2A/IL1B/TNF	8	0.275862068965517
BP	GO:0009314	response to radiation	10/108	452/18903	0.000265129294380952	0.00115644497155214	0.000529892235133047	EGR1/CXCL12/FOXP3/PIK3R1/MMP9/GRB2/ITGB1/AKT1/PTGS2/TNF	10	0.221238938053097
BP	GO:0032368	regulation of lipid transport	6/108	155/18903	0.00026522741404171	0.00115644497155214	0.000529892235133047	LEP/PLA2G10/AKT1/RETN/NKX3-1/IL1B	6	0.387096774193548
BP	GO:0001776	leukocyte homeostasis	5/108	100/18903	0.000271400657864716	0.00118038828835131	0.000540863252317015	FOXP3/IL6/SOS1/PPP3CB/AKT1	5	0.5
BP	GO:0002532	production of molecular mediator involved in inflammatory response	5/108	100/18903	0.000271400657864716	0.00118038828835131	0.000540863252317015	LEP/IL6/PLA2G10/SERPINE1/TNF	5	0.5
BP	GO:0002686	negative regulation of leukocyte migration	4/108	55/18903	0.000274644487655099	0.00118704022005238	0.000543911220048932	CXCL12/CCL21/AKT1/EMILIN1	4	0.727272727272727
BP	GO:0003179	heart valve morphogenesis	4/108	55/18903	0.000274644487655099	0.00118704022005238	0.000543911220048932	TIE1/TGFB1/TWIST1/EMILIN1	4	0.727272727272727
BP	GO:0010761	fibroblast migration	4/108	55/18903	0.000274644487655099	0.00118704022005238	0.000543911220048932	FGF2/ITGB1/TGFB1/AKT1	4	0.727272727272727
BP	GO:0045668	negative regulation of osteoblast differentiation	4/108	55/18903	0.000274644487655099	0.00118704022005238	0.000543911220048932	VEGFC/TWIST1/SEMA4D/TNF	4	0.727272727272727
BP	GO:1904645	response to amyloid-beta	4/108	55/18903	0.000274644487655099	0.00118704022005238	0.000543911220048932	IGF1/MMP9/ITGA4/TNF	4	0.727272727272727
BP	GO:0001836	release of cytochrome c from mitochondria	4/108	56/18903	0.000294478566329093	0.00126801591620811	0.00058101492466345	IGF1/MMP9/AKT1/HGF	4	0.714285714285714
BP	GO:0010559	regulation of glycoprotein biosynthetic process	4/108	56/18903	0.000294478566329093	0.00126801591620811	0.00058101492466345	IGF1/CCL21/CCR7/CCL19	4	0.714285714285714
BP	GO:0060986	endocrine hormone secretion	4/108	56/18903	0.000294478566329093	0.00126801591620811	0.00058101492466345	LEP/RETN/NKX3-1/IL1B	4	0.714285714285714
BP	GO:0048143	astrocyte activation	3/108	23/18903	0.000295545418568346	0.00127102886842685	0.000582395483206927	IL6/IL1B/TNF	3	1.30434782608696
BP	GO:0019218	regulation of steroid metabolic process	5/108	102/18903	0.000297557085091301	0.00127650883344001	0.000584906446530478	LEP/EGR1/PROX1/ADM/TNF	5	0.490196078431373
BP	GO:0060419	heart growth	5/108	102/18903	0.000297557085091301	0.00127650883344001	0.000584906446530478	S1PR1/IGF1/FGF2/PROX1/MAPK11	5	0.490196078431373
BP	GO:0008064	regulation of actin polymerization or depolymerization	6/108	159/18903	0.000304164906680227	0.00130324122144424	0.00059715543820623	CXCL12/GRB2/CCL21/CCR7/PIK3CA/ARF6	6	0.377358490566038
BP	GO:0030072	peptide hormone secretion	7/108	225/18903	0.000310622245739276	0.00132737363086909	0.000608213099127282	LEP/IL6/PPP3CB/CCL5/IRS1/IL1B/TNF	7	0.311111111111111
BP	GO:0032677	regulation of interleukin-8 production	5/108	103/18903	0.000311330845830647	0.00132737363086909	0.000608213099127282	LEP/IL6/SERPINE1/IL1B/TNF	5	0.485436893203884
BP	GO:0043255	regulation of carbohydrate biosynthetic process	5/108	103/18903	0.000311330845830647	0.00132737363086909	0.000608213099127282	LEP/IGF1/TGFB1/AKT1/IRS1	5	0.485436893203884
BP	GO:0046620	regulation of organ growth	5/108	103/18903	0.000311330845830647	0.00132737363086909	0.000608213099127282	IGF1/FGF2/PROX1/AKT1/MAPK11	5	0.485436893203884
BP	GO:0032768	regulation of monooxygenase activity	4/108	57/18903	0.000315319686780525	0.00134107709537368	0.000614492134977695	LEP/AKT1/IL1B/TNF	4	0.701754385964912
BP	GO:1903053	regulation of extracellular matrix organization	4/108	57/18903	0.000315319686780525	0.00134107709537368	0.000614492134977695	TIE1/IL6/TGFB1/EMILIN1	4	0.701754385964912
BP	GO:0032637	interleukin-8 production	5/108	104/18903	0.000325582610535131	0.00138302699100936	0.000633713909042871	LEP/IL6/SERPINE1/IL1B/TNF	5	0.480769230769231
BP	GO:0048705	skeletal system morphogenesis	7/108	227/18903	0.000327688074874836	0.00139026484707927	0.000637030351956112	GHR/COL1A1/CYP26B1/FGFR3/TWIST1/HOXD10/SIX1	7	0.308370044052863
BP	GO:0030832	regulation of actin filament length	6/108	162/18903	0.00033620640660482	0.00142185303471317	0.00065150430943864	CXCL12/GRB2/CCL21/CCR7/PIK3CA/ARF6	6	0.37037037037037
BP	GO:0002922	positive regulation of humoral immune response	3/108	24/18903	0.000336365579269233	0.00142185303471317	0.00065150430943864	CCR7/IL1B/TNF	3	1.25
BP	GO:0035162	embryonic hemopoiesis	3/108	24/18903	0.000336365579269233	0.00142185303471317	0.00065150430943864	KDR/VEGFA/GATA2	3	1.25
BP	GO:0001706	endoderm formation	4/108	58/18903	0.000337197247920863	0.00142363033207564	0.000652318681151143	FN1/MMP9/GRB2/ITGA4	4	0.689655172413793
BP	GO:0008585	female gonad development	5/108	105/18903	0.000340323236772252	0.00143333217239116	0.000656764141139434	LEP/ADAMTS1/KDR/VEGFA/RETN	5	0.476190476190476
BP	GO:0032760	positive regulation of tumor necrosis factor production	5/108	105/18903	0.000340323236772252	0.00143333217239116	0.000656764141139434	LEP/PIK3R1/IL6/TWIST1/CCL19	5	0.476190476190476
BP	GO:0048511	rhythmic process	8/108	302/18903	0.000341879191406799	0.00143813579665898	0.000658965199782627	LEP/EGR1/ADAMTS1/NTRK2/PROX1/TWIST1/RETN/TNF	8	0.264900662251656
BP	GO:0019318	hexose metabolic process	7/108	229/18903	0.000345498904537271	0.00145159855280101	0.000665133941156959	LEP/PFKFB3/IGF1/PIK3CA/AKT1/IRS1/TNF	7	0.305676855895196
BP	GO:0002790	peptide secretion	7/108	230/18903	0.000354691080455557	0.00148841275216623	0.000682002498560158	LEP/IL6/PPP3CB/CCL5/IRS1/IL1B/TNF	7	0.304347826086957
BP	GO:0007566	embryo implantation	4/108	59/18903	0.000360140809177238	0.00150945215662421	0.000691642920135208	MMP9/VEGFA/PTGS2/IL1B	4	0.677966101694915
BP	GO:0043567	regulation of insulin-like growth factor receptor signaling pathway	3/108	25/18903	0.000380648993567859	0.00158390242275472	0.000725756621086492	IGF1/IGFBP1/NKX3-1	3	1.2
BP	GO:0062149	detection of stimulus involved in sensory perception of pain	3/108	25/18903	0.000380648993567859	0.00158390242275472	0.000725756621086492	CXCL12/CXCR4/TNF	3	1.2
BP	GO:0090023	positive regulation of neutrophil chemotaxis	3/108	25/18903	0.000380648993567859	0.00158390242275472	0.000725756621086492	CCL21/CCR7/CCL19	3	1.2
BP	GO:1904996	positive regulation of leukocyte adhesion to vascular endothelial cell	3/108	25/18903	0.000380648993567859	0.00158390242275472	0.000725756621086492	IL6/ITGA4/TNF	3	1.2
BP	GO:2000209	regulation of anoikis	3/108	25/18903	0.000380648993567859	0.00158390242275472	0.000725756621086492	NTRK2/ITGB1/PIK3CA	3	1.2
BP	GO:2000679	positive regulation of transcription regulatory region DNA binding	3/108	25/18903	0.000380648993567859	0.00158390242275472	0.000725756621086492	IGF1/TGFB1/TWIST1	3	1.2
BP	GO:0044403	biological process involved in symbiotic interaction	8/108	307/18903	0.000381429184301225	0.00158524350066127	0.000726371113593159	FN1/SMARCA4/NRP1/JUN/EPHA2/CXCR4/ITGB1/CCL5	8	0.260586319218241
BP	GO:0045599	negative regulation of fat cell differentiation	4/108	60/18903	0.00038418008080853	0.00159476191817642	0.000730732527803174	IL6/TGFB1/GATA2/TNF	4	0.666666666666667
BP	GO:0032231	regulation of actin filament bundle assembly	5/108	108/18903	0.000387588366058215	0.00160314327753111	0.000734572932968282	S1PR1/NRP1/PIK3R1/MET/LPAR1	5	0.462962962962963
BP	GO:0032526	response to retinoic acid	5/108	108/18903	0.000387588366058215	0.00160314327753111	0.000734572932968282	LEP/COL1A1/CYP26B1/TIE1/TNF	5	0.462962962962963
BP	GO:0090263	positive regulation of canonical Wnt signaling pathway	5/108	108/18903	0.000387588366058215	0.00160314327753111	0.000734572932968282	COL1A1/FGF2/TGFB1/TBL1XR1/RSPO2	5	0.462962962962963
BP	GO:0007163	establishment or maintenance of cell polarity	7/108	234/18903	0.000393441894363327	0.00162347537340386	0.000743889260153735	TEK/CYP26B1/CCL21/CCR7/ITGB1/ARF6/CCL19	7	0.299145299145299
BP	GO:0071356	cellular response to tumor necrosis factor	7/108	234/18903	0.000393441894363327	0.00162347537340386	0.000743889260153735	COL1A1/CCL21/AKT1/CCL5/CCL19/NKX3-1/TNF	7	0.299145299145299
BP	GO:0003205	cardiac chamber development	6/108	167/18903	0.000395430959379467	0.00162974045401395	0.000746759969655209	TEK/ADAMTS1/NRP1/PROX1/SOS1/TGFB1	6	0.359281437125749
BP	GO:0055074	calcium ion homeostasis	8/108	309/18903	0.000398258467905366	0.00163944211163897	0.00075120534593327	CXCL12/FGF2/KDR/CCL21/CCR7/ADM/CCL5/CCL19	8	0.258899676375405
BP	GO:0030038	contractile actin filament bundle assembly	5/108	109/18903	0.000404395012167861	0.00165682311494099	0.000759169459155362	S1PR1/NRP1/PIK3R1/MET/LPAR1	5	0.458715596330275
BP	GO:0043149	stress fiber assembly	5/108	109/18903	0.000404395012167861	0.00165682311494099	0.000759169459155362	S1PR1/NRP1/PIK3R1/MET/LPAR1	5	0.458715596330275
BP	GO:0046545	development of primary female sexual characteristics	5/108	109/18903	0.000404395012167861	0.00165682311494099	0.000759169459155362	LEP/ADAMTS1/KDR/VEGFA/RETN	5	0.458715596330275
BP	GO:1903557	positive regulation of tumor necrosis factor superfamily cytokine production	5/108	109/18903	0.000404395012167861	0.00165682311494099	0.000759169459155362	LEP/PIK3R1/IL6/TWIST1/CCL19	5	0.458715596330275
BP	GO:0034113	heterotypic cell-cell adhesion	4/108	61/18903	0.000409344914383404	0.00167512067800868	0.000767553547313413	ITGB1/ITGA4/IL1B/TNF	4	0.655737704918033
BP	GO:0002262	myeloid cell homeostasis	6/108	169/18903	0.000421283822133649	0.00172194166732786	0.000789007295041831	EPAS1/FOXP3/IL6/PLA2G10/VEGFA/GATA2	6	0.355029585798817
BP	GO:0006929	substrate-dependent cell migration	3/108	26/18903	0.000428515415986644	0.00174122109172038	0.000797841279826876	FN1/NRP1/VEGFC	3	1.15384615384615
BP	GO:0043931	ossification involved in bone maturation	3/108	26/18903	0.000428515415986644	0.00174122109172038	0.000797841279826876	LEP/IGF1/SEMA4D	3	1.15384615384615
BP	GO:0050995	negative regulation of lipid catabolic process	3/108	26/18903	0.000428515415986644	0.00174122109172038	0.000797841279826876	AKT1/IL1B/TNF	3	1.15384615384615
BP	GO:0060343	trabecula formation	3/108	26/18903	0.000428515415986644	0.00174122109172038	0.000797841279826876	TEK/ADAMTS1/COL1A1	3	1.15384615384615
BP	GO:1903798	regulation of miRNA maturation	3/108	26/18903	0.000428515415986644	0.00174122109172038	0.000797841279826876	IL6/TGFB1/TNF	3	1.15384615384615
BP	GO:0045428	regulation of nitric oxide biosynthetic process	4/108	62/18903	0.000435665293418397	0.00176406227580642	0.000808307291082209	AKT1/PTGS2/IL1B/TNF	4	0.645161290322581
BP	GO:1903018	regulation of glycoprotein metabolic process	4/108	62/18903	0.000435665293418397	0.00176406227580642	0.000808307291082209	IGF1/CCL21/CCR7/CCL19	4	0.645161290322581
BP	GO:1904036	negative regulation of epithelial cell apoptotic process	4/108	62/18903	0.000435665293418397	0.00176406227580642	0.000808307291082209	TEK/KDR/SERPINE1/GATA2	4	0.645161290322581
BP	GO:0034446	substrate adhesion-dependent cell spreading	5/108	111/18903	0.0004396536547158	0.00177813195400245	0.000814754128943324	FN1/TEK/NRP1/PIK3R1/ITGA4	5	0.45045045045045
BP	GO:0010876	lipid localization	10/108	483/18903	0.000447415087594131	0.00180741077392168	0.000828169915868519	LEP/IL6/PLA2G10/AKT1/PTGS2/PLA2G2A/RETN/NKX3-1/IL1B/TNF	10	0.20703933747412
BP	GO:0048259	regulation of receptor-mediated endocytosis	5/108	112/18903	0.000458128628811283	0.00184853299877	0.000847012444630848	CCL21/ARF6/VEGFA/SERPINE1/CCL19	5	0.446428571428571
BP	GO:0007254	JNK cascade	6/108	172/18903	0.00046251896040267	0.00186020780080151	0.00085236193128641	FLT4/CCL21/CCR7/CCL19/IL1B/TNF	6	0.348837209302326
BP	GO:0032615	interleukin-12 production	4/108	63/18903	0.000463171324174148	0.00186020780080151	0.00085236193128641	LEP/CCR7/MAPK11/CCL19	4	0.634920634920635
BP	GO:0032655	regulation of interleukin-12 production	4/108	63/18903	0.000463171324174148	0.00186020780080151	0.00085236193128641	LEP/CCR7/MAPK11/CCL19	4	0.634920634920635
BP	GO:0032731	positive regulation of interleukin-1 beta production	4/108	63/18903	0.000463171324174148	0.00186020780080151	0.00085236193128641	EGR1/IL6/CCL19/TNF	4	0.634920634920635
BP	GO:0048843	negative regulation of axon extension involved in axon guidance	3/108	27/18903	0.000480082270983868	0.00192366298859508	0.000881437600356589	NRP1/SEMA7A/SEMA4D	3	1.11111111111111
BP	GO:1903055	positive regulation of extracellular matrix organization	3/108	27/18903	0.000480082270983868	0.00192366298859508	0.000881437600356589	IL6/TGFB1/EMILIN1	3	1.11111111111111
BP	GO:0021953	central nervous system neuron differentiation	6/108	174/18903	0.000491712531637293	0.00196798703413677	0.000901747228691695	LEP/NRP1/NTRK2/PROX1/HOXD10/GATA2	6	0.344827586206897
BP	GO:0002062	chondrocyte differentiation	5/108	114/18903	0.000496828012701174	0.00198158822577358	0.00090797940230496	ACVRL1/FGFR3/SULF2/TGFB1/LOXL2	5	0.43859649122807
BP	GO:0002824	positive regulation of adaptive immune response based on somatic recombination of immune receptors built from immunoglobulin superfamily domains	5/108	114/18903	0.000496828012701174	0.00198158822577358	0.00090797940230496	FOXP3/IL6/TGFB1/IL1B/TNF	5	0.43859649122807
BP	GO:0009408	response to heat	5/108	114/18903	0.000496828012701174	0.00198158822577358	0.00090797940230496	SCARA5/CXCL12/IGF1/AKT1/PTGS2	5	0.43859649122807
BP	GO:0003170	heart valve development	4/108	65/18903	0.000521861325480354	0.00207426395960159	0.000950444156745294	TIE1/TGFB1/TWIST1/EMILIN1	4	0.615384615384615
BP	GO:0050771	negative regulation of axonogenesis	4/108	65/18903	0.000521861325480354	0.00207426395960159	0.000950444156745294	NRP1/SEMA7A/SEMA4D/CDH1	4	0.615384615384615
BP	GO:0080164	regulation of nitric oxide metabolic process	4/108	65/18903	0.000521861325480354	0.00207426395960159	0.000950444156745294	AKT1/PTGS2/IL1B/TNF	4	0.615384615384615
BP	GO:0030194	positive regulation of blood coagulation	3/108	28/18903	0.000535464679861018	0.00211618575534115	0.000969653055215758	SERPINE1/HPSE/EMILIN1	3	1.07142857142857
BP	GO:0050996	positive regulation of lipid catabolic process	3/108	28/18903	0.000535464679861018	0.00211618575534115	0.000969653055215758	TWIST1/IRS1/IL1B	3	1.07142857142857
BP	GO:0070920	regulation of production of small RNA involved in gene silencing by RNA	3/108	28/18903	0.000535464679861018	0.00211618575534115	0.000969653055215758	IL6/TGFB1/TNF	3	1.07142857142857
BP	GO:0071624	positive regulation of granulocyte chemotaxis	3/108	28/18903	0.000535464679861018	0.00211618575534115	0.000969653055215758	CCL21/CCR7/CCL19	3	1.07142857142857
BP	GO:1900048	positive regulation of hemostasis	3/108	28/18903	0.000535464679861018	0.00211618575534115	0.000969653055215758	SERPINE1/HPSE/EMILIN1	3	1.07142857142857
BP	GO:0002065	columnar/cuboidal epithelial cell differentiation	5/108	116/18903	0.000537938524304374	0.00212111978489948	0.000971913866594763	FGF2/PROX1/AKT1/SERPINE1/GATA2	5	0.431034482758621
BP	GO:0098586	cellular response to virus	5/108	116/18903	0.000537938524304374	0.00212111978489948	0.000971913866594763	IL6/LGALS8/CCL5/MAPK11/CCL19	5	0.431034482758621
BP	GO:0015849	organic acid transport	8/108	324/18903	0.00054473983284402	0.00214549408567235	0.000983082364045192	LEP/NTRK2/PLA2G10/ITGB1/AKT1/PLA2G2A/IL1B/TNF	8	0.246913580246914
BP	GO:0071300	cellular response to retinoic acid	4/108	66/18903	0.000553106041615195	0.0021759694500816	0.000997046417122128	LEP/COL1A1/CYP26B1/TNF	4	0.606060606060606
BP	GO:0005996	monosaccharide metabolic process	7/108	248/18903	0.000556565206148048	0.00218709278511299	0.00100214321723533	LEP/PFKFB3/IGF1/PIK3CA/AKT1/IRS1/TNF	7	0.282258064516129
BP	GO:0045580	regulation of T cell differentiation	6/108	179/18903	0.000570998285202027	0.00224126537796986	0.00102696552786664	FOXP3/SMARCA4/CYP26B1/SOS1/ERBB2/CCL19	6	0.335195530726257
BP	GO:0050830	defense response to Gram-positive bacterium	5/108	118/18903	0.000581555631016408	0.00228011958615946	0.00104476883345262	IL6/EPHA2/PLA2G2A/IL1B/TNF	5	0.423728813559322
BP	GO:0050954	sensory perception of mechanical stimulus	6/108	180/18903	0.000587983369934743	0.00230271315239149	0.00105512138424822	CXCL12/COL1A1/CXCR4/SERPINE2/SIX1/TNF	6	0.333333333333333
BP	GO:0090025	regulation of monocyte chemotaxis	3/108	29/18903	0.000594775487419806	0.00232668105926256	0.00106610366879768	CXCL12/SERPINE1/CCL5	3	1.03448275862069
BP	GO:0002708	positive regulation of lymphocyte mediated immunity	5/108	119/18903	0.000604334359288259	0.00236140581473584	0.00108201482647904	FOXP3/IL6/TGFB1/IL1B/TNF	5	0.420168067226891
BP	GO:0098727	maintenance of cell number	6/108	181/18903	0.000605358566921009	0.00236274110336024	0.00108262666629082	ELAVL1/IGF1/SMARCA4/PROX1/LOXL2/GATA2	6	0.331491712707182
BP	GO:0048663	neuron fate commitment	4/108	68/18903	0.00061954743789135	0.00241539778150885	0.0011067543728097	PROX1/HOXD10/SIX1/GATA2	4	0.588235294117647
BP	GO:0002821	positive regulation of adaptive immune response	5/108	120/18903	0.00062777614198895	0.00244472553831917	0.00112019258300556	FOXP3/IL6/TGFB1/IL1B/TNF	5	0.416666666666667
BP	GO:0015833	peptide transport	7/108	254/18903	0.00064116596266615	0.00249406355365192	0.00114279965196675	LEP/IL6/PPP3CB/CCL5/IRS1/IL1B/TNF	7	0.275590551181102
BP	GO:0060249	anatomical structure homeostasis	8/108	333/18903	0.000651791191905658	0.00252597533075379	0.00115742188070357	EPAS1/S1PR1/IL6/KDR/ITGB1/VEGFA/PTGS2/GATA2	8	0.24024024024024
BP	GO:0031623	receptor internalization	5/108	121/18903	0.000651893282076132	0.00252597533075379	0.00115742188070357	CD9/GRB2/ITGB1/ADM/VEGFA	5	0.413223140495868
BP	GO:0002260	lymphocyte homeostasis	4/108	69/18903	0.000654805363429098	0.00252597533075379	0.00115742188070357	FOXP3/SOS1/PPP3CB/AKT1	4	0.579710144927536
BP	GO:0030858	positive regulation of epithelial cell differentiation	4/108	69/18903	0.000654805363429098	0.00252597533075379	0.00115742188070357	FGF2/ACVRL1/CD24/SERPINE1	4	0.579710144927536
BP	GO:0032835	glomerulus development	4/108	69/18903	0.000654805363429098	0.00252597533075379	0.00115742188070357	TEK/EGR1/SULF2/CD24	4	0.579710144927536
BP	GO:0005979	regulation of glycogen biosynthetic process	3/108	30/18903	0.000658125288370861	0.00252597533075379	0.00115742188070357	IGF1/AKT1/IRS1	3	1
BP	GO:0006027	glycosaminoglycan catabolic process	3/108	30/18903	0.000658125288370861	0.00252597533075379	0.00115742188070357	LYVE1/FGF2/TGFB1	3	1
BP	GO:0008045	motor neuron axon guidance	3/108	30/18903	0.000658125288370861	0.00252597533075379	0.00115742188070357	NRP1/ERBB2/LAMC2	3	1
BP	GO:0010962	regulation of glucan biosynthetic process	3/108	30/18903	0.000658125288370861	0.00252597533075379	0.00115742188070357	IGF1/AKT1/IRS1	3	1
BP	GO:0050820	positive regulation of coagulation	3/108	30/18903	0.000658125288370861	0.00252597533075379	0.00115742188070357	SERPINE1/HPSE/EMILIN1	3	1
BP	GO:0070498	interleukin-1-mediated signaling pathway	3/108	30/18903	0.000658125288370861	0.00252597533075379	0.00115742188070357	EGR1/IL6/IL1B	3	1
BP	GO:0090330	regulation of platelet aggregation	3/108	30/18903	0.000658125288370861	0.00252597533075379	0.00115742188070357	IL6/CD9/SERPINE2	3	1
BP	GO:0002698	negative regulation of immune effector process	5/108	122/18903	0.000676698160370364	0.00259438430919402	0.00118876741583976	FOXP3/PPP3CB/TGFB1/TWIST1/TNF	5	0.40983606557377
BP	GO:0032386	regulation of intracellular transport	8/108	336/18903	0.000691034212977455	0.00264641642182295	0.0012126089414963	LEP/PTPN14/PIK3R1/ERBB2/TGFB1/PTGS2/IL1B/CDH1	8	0.238095238095238
BP	GO:0016032	viral process	9/108	421/18903	0.000693134774898715	0.00265152772452967	0.00121495098083439	SMARCA4/NRP1/JUN/PROX1/EPHA2/CXCR4/ITGB1/CCL5/TNF	9	0.213776722090261
BP	GO:0030203	glycosaminoglycan metabolic process	5/108	123/18903	0.000702203234037094	0.00268325341747949	0.00122948794434054	LYVE1/FGF2/TGFB1/HPSE/IL1B	5	0.40650406504065
BP	GO:1990778	protein localization to cell periphery	8/108	337/18903	0.000704531244428758	0.00268918100133667	0.00123220401015974	PIK3R1/EPHA2/ITGB1/ARF6/TGFB1/AKT1/CDH1/TNF	8	0.237388724035608
BP	GO:0001933	negative regulation of protein phosphorylation	8/108	338/18903	0.000718240336904216	0.00273848903784405	0.00125479734258597	CDKN2A/JUN/TGFB1/AKT1/HGF/SEMA4D/EMILIN1/IL1B	8	0.236686390532544
BP	GO:0061437	renal system vasculature development	3/108	31/18903	0.000725622453496177	0.00275130670370204	0.00126067049848854	TEK/EGR1/NRP1	3	0.967741935483871
BP	GO:0061440	kidney vasculature development	3/108	31/18903	0.000725622453496177	0.00275130670370204	0.00126067049848854	TEK/EGR1/NRP1	3	0.967741935483871
BP	GO:0071295	cellular response to vitamin	3/108	31/18903	0.000725622453496177	0.00275130670370204	0.00126067049848854	LEP/COL1A1/POSTN	3	0.967741935483871
BP	GO:1900745	positive regulation of p38MAPK cascade	3/108	31/18903	0.000725622453496177	0.00275130670370204	0.00126067049848854	LEP/VEGFA/IL1B	3	0.967741935483871
BP	GO:0046660	female sex differentiation	5/108	124/18903	0.000728421035062432	0.00275130670370204	0.00126067049848854	LEP/ADAMTS1/KDR/VEGFA/RETN	5	0.403225806451613
BP	GO:0055007	cardiac muscle cell differentiation	5/108	124/18903	0.000728421035062432	0.00275130670370204	0.00126067049848854	IGF1/PROX1/ITGB1/TGFB1/VEGFA	5	0.403225806451613
BP	GO:0072089	stem cell proliferation	5/108	124/18903	0.000728421035062432	0.00275130670370204	0.00126067049848854	FGF2/KDR/VEGFC/SOX18/NES	5	0.403225806451613
BP	GO:0009988	cell-cell recognition	4/108	71/18903	0.000729549264586502	0.00275130670370204	0.00126067049848854	CD9/CCL21/CCR7/CCL19	4	0.563380281690141
BP	GO:0051057	positive regulation of small GTPase mediated signal transduction	4/108	71/18903	0.000729549264586502	0.00275130670370204	0.00126067049848854	IGF1/SOS1/LPAR1/NGF	4	0.563380281690141
BP	GO:0070527	platelet aggregation	4/108	71/18903	0.000729549264586502	0.00275130670370204	0.00126067049848854	FN1/IL6/CD9/SERPINE2	4	0.563380281690141
BP	GO:0060828	regulation of canonical Wnt signaling pathway	7/108	260/18903	0.000735682552721006	0.00277141784278577	0.00126988558152518	EGR1/COL1A1/FGF2/IGFBP1/TGFB1/TBL1XR1/RSPO2	7	0.269230769230769
BP	GO:0006006	glucose metabolic process	6/108	188/18903	0.000738430343462507	0.00277874548811652	0.0012732431665881	LEP/IGF1/PIK3CA/AKT1/IRS1/TNF	6	0.319148936170213
BP	GO:0043123	positive regulation of I-kappaB kinase/NF-kappaB signaling	6/108	189/18903	0.0007591516026365	0.0028536187278258	0.00130755067737951	CCL21/CCR7/LPAR1/CCL19/IL1B/TNF	6	0.317460317460317
BP	GO:0042698	ovulation cycle	4/108	72/18903	0.000769096837413848	0.00288473808356093	0.00132180981237688	LEP/EGR1/ADAMTS1/RETN	4	0.555555555555556
BP	GO:0046626	regulation of insulin receptor signaling pathway	4/108	72/18903	0.000769096837413848	0.00288473808356093	0.00132180981237688	LEP/PIK3R1/IRS1/IL1B	4	0.555555555555556
BP	GO:0072329	monocarboxylic acid catabolic process	5/108	126/18903	0.00078304531205121	0.00293387756528278	0.00134432591166686	LEP/CYP26B1/AKT1/TWIST1/IRS1	5	0.396825396825397
BP	GO:0001516	prostaglandin biosynthetic process	3/108	32/18903	0.000797373155567318	0.00297468304372204	0.00136302330471863	PLA2G10/PTGS2/IL1B	3	0.9375
BP	GO:0032770	positive regulation of monooxygenase activity	3/108	32/18903	0.000797373155567318	0.00297468304372204	0.00136302330471863	AKT1/IL1B/TNF	3	0.9375
BP	GO:0046457	prostanoid biosynthetic process	3/108	32/18903	0.000797373155567318	0.00297468304372204	0.00136302330471863	PLA2G10/PTGS2/IL1B	3	0.9375
BP	GO:1901889	negative regulation of cell junction assembly	3/108	32/18903	0.000797373155567318	0.00297468304372204	0.00136302330471863	ACVRL1/IL1B/TNF	3	0.9375
BP	GO:0000271	polysaccharide biosynthetic process	4/108	73/18903	0.00081013596002643	0.00301255713599517	0.00138037751343754	IGF1/TGFB1/AKT1/IRS1	4	0.547945205479452
BP	GO:0002067	glandular epithelial cell differentiation	4/108	73/18903	0.00081013596002643	0.00301255713599517	0.00138037751343754	FGF2/PROX1/AKT1/GATA2	4	0.547945205479452
BP	GO:0071260	cellular response to mechanical stimulus	4/108	73/18903	0.00081013596002643	0.00301255713599517	0.00138037751343754	COL1A1/FGF2/PTGS2/IL1B	4	0.547945205479452
BP	GO:0048706	embryonic skeletal system development	5/108	128/18903	0.000840672685367759	0.00312275626259998	0.00143087162508382	COL1A1/SULF2/TWIST1/HOXD10/SIX1	5	0.390625
BP	GO:0032732	positive regulation of interleukin-1 production	4/108	74/18903	0.000852697524803882	0.00316402875763241	0.00144978300883336	EGR1/IL6/CCL19/TNF	4	0.540540540540541
BP	GO:0050714	positive regulation of protein secretion	5/108	129/18903	0.000870644614311785	0.00322716451257751	0.00147871231124519	IGF1/PPP3CB/ARF6/TGFB1/VEGFC	5	0.387596899224806
BP	GO:0051497	negative regulation of stress fiber assembly	3/108	33/18903	0.000873481395021412	0.00323076131363689	0.00148036039394654	S1PR1/PIK3R1/MET	3	0.909090909090909
BP	GO:2000191	regulation of fatty acid transport	3/108	33/18903	0.000873481395021412	0.00323076131363689	0.00148036039394654	PLA2G10/AKT1/IL1B	3	0.909090909090909
BP	GO:0007369	gastrulation	6/108	196/18903	0.000917087901792339	0.00338842936606732	0.00155260514295462	FN1/MMP9/EPHA2/GRB2/ITGB1/ITGA4	6	0.306122448979592
BP	GO:0002637	regulation of immunoglobulin production	4/108	76/18903	0.000942511662897163	0.00346020718658534	0.00158549430818332	FOXP3/IL6/TGFB1/TNF	4	0.526315789473684
BP	GO:0006635	fatty acid beta-oxidation	4/108	76/18903	0.000942511662897163	0.00346020718658534	0.00158549430818332	LEP/AKT1/TWIST1/IRS1	4	0.526315789473684
BP	GO:0006809	nitric oxide biosynthetic process	4/108	76/18903	0.000942511662897163	0.00346020718658534	0.00158549430818332	AKT1/PTGS2/IL1B/TNF	4	0.526315789473684
BP	GO:0021536	diencephalon development	4/108	76/18903	0.000942511662897163	0.00346020718658534	0.00158549430818332	FGF2/NRP1/CDH1/GATA2	4	0.526315789473684
BP	GO:0045685	regulation of glial cell differentiation	4/108	76/18903	0.000942511662897163	0.00346020718658534	0.00158549430818332	IL6/CXCR4/TGFB1/SERPINE2	4	0.526315789473684
BP	GO:0060420	regulation of heart growth	4/108	76/18903	0.000942511662897163	0.00346020718658534	0.00158549430818332	IGF1/FGF2/PROX1/MAPK11	4	0.526315789473684
BP	GO:0006816	calcium ion transport	9/108	440/18903	0.000946538396470048	0.00346763590325852	0.00158889820493496	CXCL12/FGF2/PPP3CB/CCL21/CXCR4/CCR7/PTGS2/CCL5/CCL19	9	0.204545454545455
BP	GO:0045936	negative regulation of phosphate metabolic process	9/108	440/18903	0.000946538396470048	0.00346763590325852	0.00158889820493496	CDKN2A/JUN/TGFB1/AKT1/HGF/SEMA4D/EMILIN1/IL1B/TNF	9	0.204545454545455
BP	GO:0051450	myoblast proliferation	3/108	34/18903	0.000954049025396899	0.0034767555009727	0.00159307687675693	IGF1/HGF/SIX1	3	0.882352941176471
BP	GO:0055094	response to lipoprotein particle	3/108	34/18903	0.000954049025396899	0.0034767555009727	0.00159307687675693	CD9/ITGB1/AKT1	3	0.882352941176471
BP	GO:0060563	neuroepithelial cell differentiation	3/108	34/18903	0.000954049025396899	0.0034767555009727	0.00159307687675693	FGF2/SERPINE1/GATA2	3	0.882352941176471
BP	GO:0090022	regulation of neutrophil chemotaxis	3/108	34/18903	0.000954049025396899	0.0034767555009727	0.00159307687675693	CCL21/CCR7/CCL19	3	0.882352941176471
BP	GO:1902624	positive regulation of neutrophil migration	3/108	34/18903	0.000954049025396899	0.0034767555009727	0.00159307687675693	CCL21/CCR7/CCL19	3	0.882352941176471
BP	GO:0010563	negative regulation of phosphorus metabolic process	9/108	441/18903	0.000961721529257337	0.00350103042511977	0.0016041998390512	CDKN2A/JUN/TGFB1/AKT1/HGF/SEMA4D/EMILIN1/IL1B/TNF	9	0.204081632653061
BP	GO:0002534	cytokine production involved in inflammatory response	4/108	77/18903	0.000989826111693455	0.00359577964184967	0.00164761467976146	LEP/IL6/PLA2G10/TNF	4	0.51948051948052
BP	GO:1900015	regulation of cytokine production involved in inflammatory response	4/108	77/18903	0.000989826111693455	0.00359577964184967	0.00164761467976146	LEP/IL6/PLA2G10/TNF	4	0.51948051948052
BP	GO:0009746	response to hexose	6/108	199/18903	0.000992047011597303	0.00360006997290342	0.00164958054339307	EGR1/SMARCA4/PPP3CB/PIK3CA/PTGS2/TNF	6	0.301507537688442
BP	GO:0030168	platelet activation	5/108	133/18903	0.000998556811756826	0.00361989914377186	0.00165866642636267	FN1/IL6/CD9/PIK3CA/SERPINE2	5	0.37593984962406
BP	GO:0072507	divalent inorganic cation homeostasis	8/108	356/18903	0.00100414326300028	0.00363634307166001	0.0016662011642165	CXCL12/FGF2/KDR/CCL21/CCR7/ADM/CCL5/CCL19	8	0.224719101123595
BP	GO:0008154	actin polymerization or depolymerization	6/108	200/18903	0.00101805297668491	0.00367901816835403	0.001685755231144	CXCL12/GRB2/CCL21/CCR7/PIK3CA/ARF6	6	0.3
BP	GO:0043393	regulation of protein binding	6/108	200/18903	0.00101805297668491	0.00367901816835403	0.001685755231144	NRP1/MMP9/AKT1/NES/TIAM1/ITGA4	6	0.3
BP	GO:0006022	aminoglycan metabolic process	5/108	134/18903	0.00103260650600451	0.00372383721227875	0.00170629167165437	LYVE1/FGF2/TGFB1/HPSE/IL1B	5	0.373134328358209
BP	GO:0043467	regulation of generation of precursor metabolites and energy	5/108	134/18903	0.00103260650600451	0.00372383721227875	0.00170629167165437	IGF1/PIK3CA/AKT1/IRS1/TNF	5	0.373134328358209
BP	GO:0034637	cellular carbohydrate biosynthetic process	4/108	78/18903	0.00103878673938923	0.00372811040961091	0.0017082496844792	LEP/IGF1/AKT1/IRS1	4	0.512820512820513
BP	GO:0043537	negative regulation of blood vessel endothelial cell migration	4/108	78/18903	0.00103878673938923	0.00372811040961091	0.0017082496844792	FGF2/ACVRL1/TGFB1/TNF	4	0.512820512820513
BP	GO:0035137	hindlimb morphogenesis	3/108	35/18903	0.00103917577853106	0.00372811040961091	0.0017082496844792	TWIST1/HOXD10/RSPO2	3	0.857142857142857
BP	GO:1901099	negative regulation of signal transduction in absence of ligand	3/108	35/18903	0.00103917577853106	0.00372811040961091	0.0017082496844792	AKT1/IL1B/TNF	3	0.857142857142857
BP	GO:2001240	negative regulation of extrinsic apoptotic signaling pathway in absence of ligand	3/108	35/18903	0.00103917577853106	0.00372811040961091	0.0017082496844792	AKT1/IL1B/TNF	3	0.857142857142857
BP	GO:0001569	branching involved in blood vessel morphogenesis	3/108	36/18903	0.00112895928952124	0.00401691373106119	0.00184058165122357	NRP1/KDR/VEGFA	3	0.833333333333333
BP	GO:0006026	aminoglycan catabolic process	3/108	36/18903	0.00112895928952124	0.00401691373106119	0.00184058165122357	LYVE1/FGF2/TGFB1	3	0.833333333333333
BP	GO:0032232	negative regulation of actin filament bundle assembly	3/108	36/18903	0.00112895928952124	0.00401691373106119	0.00184058165122357	S1PR1/PIK3R1/MET	3	0.833333333333333
BP	GO:0035909	aorta morphogenesis	3/108	36/18903	0.00112895928952124	0.00401691373106119	0.00184058165122357	ACVRL1/PROX1/SIX1	3	0.833333333333333
BP	GO:0046320	regulation of fatty acid oxidation	3/108	36/18903	0.00112895928952124	0.00401691373106119	0.00184058165122357	AKT1/TWIST1/IRS1	3	0.833333333333333
BP	GO:0070306	lens fiber cell differentiation	3/108	36/18903	0.00112895928952124	0.00401691373106119	0.00184058165122357	FGF2/PROX1/EPHA2	3	0.833333333333333
BP	GO:0070873	regulation of glycogen metabolic process	3/108	36/18903	0.00112895928952124	0.00401691373106119	0.00184058165122357	IGF1/AKT1/IRS1	3	0.833333333333333
BP	GO:1905332	positive regulation of morphogenesis of an epithelium	3/108	36/18903	0.00112895928952124	0.00401691373106119	0.00184058165122357	FGF2/VEGFA/SIX1	3	0.833333333333333
BP	GO:1903201	regulation of oxidative stress-induced cell death	4/108	80/18903	0.00114177028187689	0.00405832517028519	0.00185955670030095	MET/AKT1/HGF/TNF	4	0.5
BP	GO:0014855	striated muscle cell proliferation	4/108	81/18903	0.00119585503701404	0.00424208433292336	0.00194375660242498	FGF2/HGF/MAPK11/SIX1	4	0.493827160493827
BP	GO:0003012	muscle system process	9/108	455/18903	0.00119591978883108	0.00424208433292336	0.00194375660242498	LEP/IGF1/VEGFB/CXCR4/SULF2/PIK3CA/PTGS2/IL1B/TNF	9	0.197802197802198
BP	GO:0010934	macrophage cytokine production	3/108	37/18903	0.00122349512145175	0.00430899299131838	0.00197441467904673	SEMA7A/TGFB1/TWIST1	3	0.810810810810811
BP	GO:0010935	regulation of macrophage cytokine production	3/108	37/18903	0.00122349512145175	0.00430899299131838	0.00197441467904673	SEMA7A/TGFB1/TWIST1	3	0.810810810810811
BP	GO:0031076	embryonic camera-type eye development	3/108	37/18903	0.00122349512145175	0.00430899299131838	0.00197441467904673	PROX1/TWIST1/NES	3	0.810810810810811
BP	GO:0038179	neurotrophin signaling pathway	3/108	37/18903	0.00122349512145175	0.00430899299131838	0.00197441467904673	NTRK2/SOS1/NGF	3	0.810810810810811
BP	GO:0060416	response to growth hormone	3/108	37/18903	0.00122349512145175	0.00430899299131838	0.00197441467904673	GHR/PIK3R1/AKT1	3	0.810810810810811
BP	GO:0071276	cellular response to cadmium ion	3/108	37/18903	0.00122349512145175	0.00430899299131838	0.00197441467904673	MMP9/JUN/AKT1	3	0.810810810810811
BP	GO:0071402	cellular response to lipoprotein particle stimulus	3/108	37/18903	0.00122349512145175	0.00430899299131838	0.00197441467904673	CD9/ITGB1/AKT1	3	0.810810810810811
BP	GO:0019722	calcium-mediated signaling	6/108	208/18903	0.00124546160095259	0.00438189843749785	0.00200782053127467	IGF1/KDR/PPP3CB/CXCR4/CCR7/TNF	6	0.288461538461538
BP	GO:0031016	pancreas development	4/108	82/18903	0.00125170963854365	0.00439049520632028	0.00201175963876209	IL6/PROX1/MET/AKT1	4	0.48780487804878
BP	GO:0046209	nitric oxide metabolic process	4/108	82/18903	0.00125170963854365	0.00439049520632028	0.00201175963876209	AKT1/PTGS2/IL1B/TNF	4	0.48780487804878
BP	GO:0048708	astrocyte differentiation	4/108	82/18903	0.00125170963854365	0.00439049520632028	0.00201175963876209	IL6/SERPINE2/IL1B/TNF	4	0.48780487804878
BP	GO:0002705	positive regulation of leukocyte mediated immunity	5/108	140/18903	0.00125532898038985	0.0043942860769562	0.00201349664567879	FOXP3/IL6/TGFB1/IL1B/TNF	5	0.357142857142857
BP	GO:0007266	Rho protein signal transduction	5/108	140/18903	0.00125532898038985	0.0043942860769562	0.00201349664567879	NRP1/COL1A2/MET/ITGB1/LPAR1	5	0.357142857142857
BP	GO:0045619	regulation of lymphocyte differentiation	6/108	210/18903	0.0013079533061802	0.00456957805470861	0.00209381681670038	FOXP3/SMARCA4/CYP26B1/SOS1/ERBB2/CCL19	6	0.285714285714286
BP	GO:0007492	endoderm development	4/108	83/18903	0.00130936494230819	0.00456957805470861	0.00209381681670038	FN1/MMP9/GRB2/ITGA4	4	0.481927710843373
BP	GO:2001057	reactive nitrogen species metabolic process	4/108	83/18903	0.00130936494230819	0.00456957805470861	0.00209381681670038	AKT1/PTGS2/IL1B/TNF	4	0.481927710843373
BP	GO:0002369	T cell cytokine production	3/108	38/18903	0.00132287678988838	0.00459819221545538	0.00210692805153433	FOXP3/IL6/IL1B	3	0.789473684210526
BP	GO:0002724	regulation of T cell cytokine production	3/108	38/18903	0.00132287678988838	0.00459819221545538	0.00210692805153433	FOXP3/IL6/IL1B	3	0.789473684210526
BP	GO:0010742	macrophage derived foam cell differentiation	3/108	38/18903	0.00132287678988838	0.00459819221545538	0.00210692805153433	PLA2G10/TGFB1/PLA2G2A	3	0.789473684210526
BP	GO:0032094	response to food	3/108	38/18903	0.00132287678988838	0.00459819221545538	0.00210692805153433	GHR/LEP/AKT1	3	0.789473684210526
BP	GO:0015711	organic anion transport	8/108	372/18903	0.00132900672813068	0.00461486589045979	0.00211456806133446	LEP/NTRK2/PLA2G10/ITGB1/PTGS2/PLA2G2A/IL1B/TNF	8	0.21505376344086
BP	GO:0007249	I-kappaB kinase/NF-kappaB signaling	7/108	288/18903	0.00133250961182801	0.00462239306227312	0.00211801707101025	CCL21/CCR7/LPAR1/AKT1/CCL19/IL1B/TNF	7	0.243055555555556
BP	GO:0045727	positive regulation of translation	5/108	143/18903	0.00137914038220135	0.00477936336654761	0.00218994210629306	ELAVL1/IL6/ERBB2/CCL5/TNF	5	0.34965034965035
BP	GO:0001542	ovulation from ovarian follicle	2/108	10/18903	0.00141249526319913	0.00483685321582136	0.00221628441005892	LEP/ADAMTS1	2	2
BP	GO:0021561	facial nerve development	2/108	10/18903	0.00141249526319913	0.00483685321582136	0.00221628441005892	NRP1/SIX1	2	2
BP	GO:0021610	facial nerve morphogenesis	2/108	10/18903	0.00141249526319913	0.00483685321582136	0.00221628441005892	NRP1/SIX1	2	2
BP	GO:0035907	dorsal aorta development	2/108	10/18903	0.00141249526319913	0.00483685321582136	0.00221628441005892	ACVRL1/NKX3-1	2	2
BP	GO:0043587	tongue morphogenesis	2/108	10/18903	0.00141249526319913	0.00483685321582136	0.00221628441005892	CYP26B1/SIX1	2	2
BP	GO:0046886	positive regulation of hormone biosynthetic process	2/108	10/18903	0.00141249526319913	0.00483685321582136	0.00221628441005892	EGR1/ADM	2	2
BP	GO:0048672	positive regulation of collateral sprouting	2/108	10/18903	0.00141249526319913	0.00483685321582136	0.00221628441005892	SEMA4D/NGF	2	2
BP	GO:0070091	glucagon secretion	2/108	10/18903	0.00141249526319913	0.00483685321582136	0.00221628441005892	LEP/IL6	2	2
BP	GO:0070092	regulation of glucagon secretion	2/108	10/18903	0.00141249526319913	0.00483685321582136	0.00221628441005892	LEP/IL6	2	2
BP	GO:0090037	positive regulation of protein kinase C signaling	2/108	10/18903	0.00141249526319913	0.00483685321582136	0.00221628441005892	FLT4/VEGFA	2	2
BP	GO:1901203	positive regulation of extracellular matrix assembly	2/108	10/18903	0.00141249526319913	0.00483685321582136	0.00221628441005892	TGFB1/EMILIN1	2	2
BP	GO:2000510	positive regulation of dendritic cell chemotaxis	2/108	10/18903	0.00141249526319913	0.00483685321582136	0.00221628441005892	CCL21/CCR7	2	2
BP	GO:0033028	myeloid cell apoptotic process	3/108	39/18903	0.0014271957871424	0.00486793282274582	0.00223052533183677	CDKN2A/IL6/ARF6	3	0.769230769230769
BP	GO:0035136	forelimb morphogenesis	3/108	39/18903	0.0014271957871424	0.00486793282274582	0.00223052533183677	TWIST1/HOXD10/RSPO2	3	0.769230769230769
BP	GO:0044060	regulation of endocrine process	3/108	39/18903	0.0014271957871424	0.00486793282274582	0.00223052533183677	LEP/RETN/NKX3-1	3	0.769230769230769
BP	GO:0090077	foam cell differentiation	3/108	39/18903	0.0014271957871424	0.00486793282274582	0.00223052533183677	PLA2G10/TGFB1/PLA2G2A	3	0.769230769230769
BP	GO:0021954	central nervous system neuron development	4/108	85/18903	0.00143020088786055	0.00487338137182403	0.00223302190013038	LEP/NRP1/NTRK2/GATA2	4	0.470588235294118
BP	GO:0048562	embryonic organ morphogenesis	7/108	294/18903	0.00149944687157693	0.00510431176932087	0.00233883603525998	PROX1/EPHA2/TWIST1/SOX18/HOXD10/SIX1/GATA2	7	0.238095238095238
BP	GO:0010863	positive regulation of phospholipase C activity	3/108	40/18903	0.0015365416063061	0.00521520298140363	0.00238964726594766	FGF2/FLT1/LPAR1	3	0.75
BP	GO:0032965	regulation of collagen biosynthetic process	3/108	40/18903	0.0015365416063061	0.00521520298140363	0.00238964726594766	IL6/TGFB1/EMILIN1	3	0.75
BP	GO:1901532	regulation of hematopoietic progenitor cell differentiation	3/108	40/18903	0.0015365416063061	0.00521520298140363	0.00238964726594766	KDR/SOS1/GATA2	3	0.75
BP	GO:0042326	negative regulation of phosphorylation	8/108	381/18903	0.00154558228121409	0.00524075010535081	0.00240135316025531	CDKN2A/JUN/TGFB1/AKT1/HGF/SEMA4D/EMILIN1/IL1B	8	0.20997375328084
BP	GO:0035264	multicellular organism growth	5/108	147/18903	0.00155796059807998	0.00524883444459115	0.00240505746845415	GHR/IGF1/SOS1/PIK3CA/TBL1XR1	5	0.340136054421769
BP	GO:0035296	regulation of tube diameter	5/108	147/18903	0.00155796059807998	0.00524883444459115	0.00240505746845415	LEP/ITGA1/ADM/PTGS2/TNF	5	0.340136054421769
BP	GO:0097746	blood vessel diameter maintenance	5/108	147/18903	0.00155796059807998	0.00524883444459115	0.00240505746845415	LEP/ITGA1/ADM/PTGS2/TNF	5	0.340136054421769
BP	GO:0106106	cold-induced thermogenesis	5/108	147/18903	0.00155796059807998	0.00524883444459115	0.00240505746845415	EPAS1/LEP/CXCR4/VEGFA/LCN2	5	0.340136054421769
BP	GO:0120161	regulation of cold-induced thermogenesis	5/108	147/18903	0.00155796059807998	0.00524883444459115	0.00240505746845415	EPAS1/LEP/CXCR4/VEGFA/LCN2	5	0.340136054421769
BP	GO:1903038	negative regulation of leukocyte cell-cell adhesion	5/108	147/18903	0.00155796059807998	0.00524883444459115	0.00240505746845415	CXCL12/FOXP3/ERBB2/CCL21/AKT1	5	0.340136054421769
BP	GO:0042886	amide transport	7/108	296/18903	0.00155857937869431	0.00524883444459115	0.00240505746845415	LEP/IL6/PPP3CB/CCL5/IRS1/IL1B/TNF	7	0.236486486486487
BP	GO:0042742	defense response to bacterium	8/108	382/18903	0.00157128089646729	0.00528646692280833	0.0024223009677011	IL6/EPHA2/SERPINE1/PLA2G2A/EMILIN1/IL1B/LCN2/TNF	8	0.209424083769634
BP	GO:0035150	regulation of tube size	5/108	148/18903	0.00160521081831176	0.0053953784980537	0.00247220511312807	LEP/ITGA1/ADM/PTGS2/TNF	5	0.337837837837838
BP	GO:0006112	energy reserve metabolic process	4/108	88/18903	0.00162572900464988	0.00544847416660008	0.00249653396852027	LEP/IGF1/AKT1/IRS1	4	0.454545454545455
BP	GO:0032370	positive regulation of lipid transport	4/108	88/18903	0.00162572900464988	0.00544847416660008	0.00249653396852027	PLA2G10/RETN/NKX3-1/IL1B	4	0.454545454545455
BP	GO:0035023	regulation of Rho protein signal transduction	4/108	88/18903	0.00162572900464988	0.00544847416660008	0.00249653396852027	NRP1/MET/ITGB1/LPAR1	4	0.454545454545455
BP	GO:0042119	neutrophil activation	3/108	41/18903	0.00165100176506147	0.00550652033780618	0.00252313118339686	CCL5/PLA2G2A/TNF	3	0.731707317073171
BP	GO:0050850	positive regulation of calcium-mediated signaling	3/108	41/18903	0.00165100176506147	0.00550652033780618	0.00252313118339686	IGF1/PPP3CB/TNF	3	0.731707317073171
BP	GO:0060421	positive regulation of heart growth	3/108	41/18903	0.00165100176506147	0.00550652033780618	0.00252313118339686	IGF1/FGF2/PROX1	3	0.731707317073171
BP	GO:0070884	regulation of calcineurin-NFAT signaling cascade	3/108	41/18903	0.00165100176506147	0.00550652033780618	0.00252313118339686	IGF1/PPP3CB/TNF	3	0.731707317073171
BP	GO:2000008	regulation of protein localization to cell surface	3/108	41/18903	0.00165100176506147	0.00550652033780618	0.00252313118339686	ARF6/AKT1/TNF	3	0.731707317073171
BP	GO:0002709	regulation of T cell mediated immunity	4/108	89/18903	0.0016948339874388	0.00564454906952144	0.00258637704027754	FOXP3/IL6/PPP3CB/IL1B	4	0.449438202247191
BP	GO:0043583	ear development	6/108	221/18903	0.00169564732302204	0.00564454906952144	0.00258637704027754	FGF2/PROX1/TWIST1/SIX1/CEBPD/GATA2	6	0.271493212669683
BP	GO:0010821	regulation of mitochondrion organization	5/108	150/18903	0.00170286260812134	0.00566312233363695	0.0025948874568369	IGF1/MMP9/KDR/AKT1/HGF	5	0.333333333333333
BP	GO:0051054	positive regulation of DNA metabolic process	7/108	301/18903	0.00171439066507327	0.00568717252769387	0.00260590744602592	SMARCA4/FGF2/IL6/TGFB1/AKT1/HGF/TNF	7	0.232558139534884
BP	GO:0032000	positive regulation of fatty acid beta-oxidation	2/108	11/18903	0.00171995079043775	0.00568717252769387	0.00260590744602592	TWIST1/IRS1	2	1.81818181818182
BP	GO:0060900	embryonic camera-type eye formation	2/108	11/18903	0.00171995079043775	0.00568717252769387	0.00260590744602592	PROX1/TWIST1	2	1.81818181818182
BP	GO:0061418	regulation of transcription from RNA polymerase II promoter in response to hypoxia	2/108	11/18903	0.00171995079043775	0.00568717252769387	0.00260590744602592	EGR1/VEGFA	2	1.81818181818182
BP	GO:0071679	commissural neuron axon guidance	2/108	11/18903	0.00171995079043775	0.00568717252769387	0.00260590744602592	NRP1/VEGFA	2	1.81818181818182
BP	GO:2000833	positive regulation of steroid hormone secretion	2/108	11/18903	0.00171995079043775	0.00568717252769387	0.00260590744602592	RETN/NKX3-1	2	1.81818181818182
BP	GO:0044242	cellular lipid catabolic process	6/108	222/18903	0.00173479392551201	0.00573077916996431	0.00262588835450643	LEP/CYP26B1/PLA2G10/AKT1/TWIST1/IRS1	6	0.27027027027027
BP	GO:0010591	regulation of lamellipodium assembly	3/108	42/18903	0.00177066182926431	0.00579946192328575	0.00265735933545916	PIK3R1/EPHA2/PIK3CA	3	0.714285714285714
BP	GO:0010907	positive regulation of glucose metabolic process	3/108	42/18903	0.00177066182926431	0.00579946192328575	0.00265735933545916	IGF1/AKT1/IRS1	3	0.714285714285714
BP	GO:0014002	astrocyte development	3/108	42/18903	0.00177066182926431	0.00579946192328575	0.00265735933545916	IL6/IL1B/TNF	3	0.714285714285714
BP	GO:0014904	myotube cell development	3/108	42/18903	0.00177066182926431	0.00579946192328575	0.00265735933545916	IGF1/PPP3CB/SIX1	3	0.714285714285714
BP	GO:0021983	pituitary gland development	3/108	42/18903	0.00177066182926431	0.00579946192328575	0.00265735933545916	FGF2/CDH1/GATA2	3	0.714285714285714
BP	GO:0031670	cellular response to nutrient	3/108	42/18903	0.00177066182926431	0.00579946192328575	0.00265735933545916	LEP/COL1A1/POSTN	3	0.714285714285714
BP	GO:0043029	T cell homeostasis	3/108	42/18903	0.00177066182926431	0.00579946192328575	0.00265735933545916	FOXP3/PPP3CB/AKT1	3	0.714285714285714
BP	GO:0106056	regulation of calcineurin-mediated signaling	3/108	42/18903	0.00177066182926431	0.00579946192328575	0.00265735933545916	IGF1/PPP3CB/TNF	3	0.714285714285714
BP	GO:1900274	regulation of phospholipase C activity	3/108	42/18903	0.00177066182926431	0.00579946192328575	0.00265735933545916	FGF2/FLT1/LPAR1	3	0.714285714285714
BP	GO:0022411	cellular component disassembly	9/108	483/18903	0.00180282768784904	0.0058992338897291	0.0027030756398254	SMARCA4/PIK3R1/MMP9/IL6/PIK3CA/ARF6/TGFB1/NES/TNF	9	0.186335403726708
BP	GO:0016331	morphogenesis of embryonic epithelium	5/108	153/18903	0.00185742811824112	0.00607215877747947	0.00278231119148091	TGFB1/VEGFC/ADM/TWIST1/SIX1	5	0.326797385620915
BP	GO:0048608	reproductive structure development	7/108	306/18903	0.00188207665014929	0.00614693336114796	0.00281657349729392	LEP/ADAMTS1/KDR/VEGFA/SERPINE2/RETN/NKX3-1	7	0.228758169934641
BP	GO:0021879	forebrain neuron differentiation	3/108	43/18903	0.00189560543630517	0.00616784400421851	0.00282615491938256	NRP1/PROX1/GATA2	3	0.697674418604651
BP	GO:0031952	regulation of protein autophosphorylation	3/108	43/18903	0.00189560543630517	0.00616784400421851	0.00282615491938256	JUN/VEGFC/VEGFA	3	0.697674418604651
BP	GO:0045687	positive regulation of glial cell differentiation	3/108	43/18903	0.00189560543630517	0.00616784400421851	0.00282615491938256	CXCR4/TGFB1/SERPINE2	3	0.697674418604651
BP	GO:0071364	cellular response to epidermal growth factor stimulus	3/108	43/18903	0.00189560543630517	0.00616784400421851	0.00282615491938256	COL1A1/ERBB2/AKT1	3	0.697674418604651
BP	GO:0051651	maintenance of location in cell	6/108	226/18903	0.00189829103044131	0.00617078267360357	0.00282750144094396	FGF2/CCL21/CCR7/AKT1/CCL19/LCN2	6	0.265486725663717
BP	GO:0007584	response to nutrient	5/108	154/18903	0.00191116277618241	0.00620097987923476	0.00284133803946815	LEP/COL1A1/POSTN/CYP26B1/PTGS2	5	0.324675324675325
BP	GO:0008360	regulation of cell shape	5/108	154/18903	0.00191116277618241	0.00620097987923476	0.00284133803946815	FN1/KDR/LPAR1/SEMA4D/VEGFA	5	0.324675324675325
BP	GO:0072091	regulation of stem cell proliferation	4/108	92/18903	0.00191436231158204	0.006205545245971	0.0028434299266254	FGF2/KDR/VEGFC/SOX18	4	0.434782608695652
BP	GO:0009100	glycoprotein metabolic process	8/108	395/18903	0.00193731932990604	0.00627408748375559	0.00287483652224746	LEP/IGF1/VEGFB/CCL21/CCR7/SULF2/HPSE/CCL19	8	0.20253164556962
BP	GO:0050886	endocrine process	4/108	93/18903	0.00199171056964384	0.00643819046882072	0.00295002980829847	LEP/RETN/NKX3-1/IL1B	4	0.43010752688172
BP	GO:0055017	cardiac muscle tissue growth	4/108	93/18903	0.00199171056964384	0.00643819046882072	0.00295002980829847	S1PR1/IGF1/FGF2/MAPK11	4	0.43010752688172
BP	GO:0060070	canonical Wnt signaling pathway	7/108	310/18903	0.00202518079694429	0.00651832283436756	0.00298674709215601	EGR1/COL1A1/FGF2/IGFBP1/TGFB1/TBL1XR1/RSPO2	7	0.225806451612903
BP	GO:0061458	reproductive system development	7/108	310/18903	0.00202518079694429	0.00651832283436756	0.00298674709215601	LEP/ADAMTS1/KDR/VEGFA/SERPINE2/RETN/NKX3-1	7	0.225806451612903
BP	GO:0001709	cell fate determination	3/108	44/18903	0.00202591431824942	0.00651832283436756	0.00298674709215601	CYP26B1/PROX1/GATA2	3	0.681818181818182
BP	GO:0045840	positive regulation of mitotic nuclear division	3/108	44/18903	0.00202591431824942	0.00651832283436756	0.00298674709215601	IGF1/IL1B/TNF	3	0.681818181818182
BP	GO:1905521	regulation of macrophage migration	3/108	44/18903	0.00202591431824942	0.00651832283436756	0.00298674709215601	CD9/CCL5/EMILIN1	3	0.681818181818182
BP	GO:0010936	negative regulation of macrophage cytokine production	2/108	12/18903	0.00205625427806083	0.00651900394747856	0.00298705918357207	TGFB1/TWIST1	2	1.66666666666667
BP	GO:0014842	regulation of skeletal muscle satellite cell proliferation	2/108	12/18903	0.00205625427806083	0.00651900394747856	0.00298705918357207	FGF2/SIX1	2	1.66666666666667
BP	GO:0032966	negative regulation of collagen biosynthetic process	2/108	12/18903	0.00205625427806083	0.00651900394747856	0.00298705918357207	IL6/EMILIN1	2	1.66666666666667
BP	GO:0045602	negative regulation of endothelial cell differentiation	2/108	12/18903	0.00205625427806083	0.00651900394747856	0.00298705918357207	ACVRL1/VEGFA	2	1.66666666666667
BP	GO:0051549	positive regulation of keratinocyte migration	2/108	12/18903	0.00205625427806083	0.00651900394747856	0.00298705918357207	MMP9/ARF6	2	1.66666666666667
BP	GO:0051798	positive regulation of hair follicle development	2/108	12/18903	0.00205625427806083	0.00651900394747856	0.00298705918357207	HPSE/TNF	2	1.66666666666667
BP	GO:0060312	regulation of blood vessel remodeling	2/108	12/18903	0.00205625427806083	0.00651900394747856	0.00298705918357207	FLT4/TGFB1	2	1.66666666666667
BP	GO:0060788	ectodermal placode formation	2/108	12/18903	0.00205625427806083	0.00651900394747856	0.00298705918357207	PROX1/SIX1	2	1.66666666666667
BP	GO:0071635	negative regulation of transforming growth factor beta production	2/108	12/18903	0.00205625427806083	0.00651900394747856	0.00298705918357207	FN1/CD24	2	1.66666666666667
BP	GO:0071697	ectodermal placode morphogenesis	2/108	12/18903	0.00205625427806083	0.00651900394747856	0.00298705918357207	PROX1/SIX1	2	1.66666666666667
BP	GO:0090331	negative regulation of platelet aggregation	2/108	12/18903	0.00205625427806083	0.00651900394747856	0.00298705918357207	CD9/SERPINE2	2	1.66666666666667
BP	GO:0097084	vascular associated smooth muscle cell development	2/108	12/18903	0.00205625427806083	0.00651900394747856	0.00298705918357207	ADM/VEGFA	2	1.66666666666667
BP	GO:1902667	regulation of axon guidance	2/108	12/18903	0.00205625427806083	0.00651900394747856	0.00298705918357207	NRP1/VEGFA	2	1.66666666666667
BP	GO:1903800	positive regulation of miRNA maturation	2/108	12/18903	0.00205625427806083	0.00651900394747856	0.00298705918357207	IL6/TGFB1	2	1.66666666666667
BP	GO:2000508	regulation of dendritic cell chemotaxis	2/108	12/18903	0.00205625427806083	0.00651900394747856	0.00298705918357207	CCL21/CCR7	2	1.66666666666667
BP	GO:2001214	positive regulation of vasculogenesis	2/108	12/18903	0.00205625427806083	0.00651900394747856	0.00298705918357207	KDR/ADM	2	1.66666666666667
BP	GO:0008037	cell recognition	6/108	230/18903	0.00207321922145315	0.00656677488076012	0.0030089482031395	NRP1/CD9/CCL21/CXCR4/CCR7/CCL19	6	0.260869565217391
BP	GO:0010976	positive regulation of neuron projection development	5/108	157/18903	0.00207920231649978	0.0065797060509344	0.00301487336761779	NRP1/NTRK2/HGF/ITGA6/VEGFA	5	0.318471337579618
BP	GO:0022604	regulation of cell morphogenesis	7/108	312/18903	0.00209982594992441	0.00663890177044595	0.00304199731462253	FN1/NRP1/KDR/CXCR4/LPAR1/SEMA4D/VEGFA	7	0.224358974358974
BP	GO:1900407	regulation of cellular response to oxidative stress	4/108	95/18903	0.00215284620449781	0.00679718050891177	0.00311452188480344	MET/AKT1/HGF/TNF	4	0.421052631578947
BP	GO:0005978	glycogen biosynthetic process	3/108	45/18903	0.0021616683247579	0.00679718050891177	0.00311452188480344	IGF1/AKT1/IRS1	3	0.666666666666667
BP	GO:0009250	glucan biosynthetic process	3/108	45/18903	0.0021616683247579	0.00679718050891177	0.00311452188480344	IGF1/AKT1/IRS1	3	0.666666666666667
BP	GO:0030574	collagen catabolic process	3/108	45/18903	0.0021616683247579	0.00679718050891177	0.00311452188480344	MMP9/ITGB1/ADAMTS3	3	0.666666666666667
BP	GO:0051955	regulation of amino acid transport	3/108	45/18903	0.0021616683247579	0.00679718050891177	0.00311452188480344	LEP/ITGB1/TNF	3	0.666666666666667
BP	GO:1904646	cellular response to amyloid-beta	3/108	45/18903	0.0021616683247579	0.00679718050891177	0.00311452188480344	IGF1/ITGA4/TNF	3	0.666666666666667
BP	GO:0006909	phagocytosis	7/108	314/18903	0.00217658616180957	0.0068378777606032	0.00313316968750312	LEP/MET/ITGB1/PIK3CA/IL1B/GATA2/TNF	7	0.222929936305732
BP	GO:0007292	female gamete generation	5/108	159/18903	0.00219706631216101	0.00688971338107013	0.00315692117889649	LEP/ADAMTS1/IGF1/SOS1/PTGS2	5	0.314465408805031
BP	GO:0060041	retina development in camera-type eye	5/108	159/18903	0.00219706631216101	0.00688971338107013	0.00315692117889649	SMARCA4/NRP1/ACVRL1/NTRK2/PROX1	5	0.314465408805031
BP	GO:0008406	gonad development	6/108	233/18903	0.00221222002738017	0.00693095541609969	0.00317581860563174	LEP/ADAMTS1/KDR/VEGFA/RETN/NKX3-1	6	0.257510729613734
BP	GO:0051153	regulation of striated muscle cell differentiation	4/108	96/18903	0.00223669353381029	0.00699497110573734	0.00320515110108127	IGF1/CYP26B1/PROX1/TGFB1	4	0.416666666666667
BP	GO:0072080	nephron tubule development	4/108	96/18903	0.00223669353381029	0.00699497110573734	0.00320515110108127	FGF2/CD24/VEGFA/SIX1	4	0.416666666666667
BP	GO:0051017	actin filament bundle assembly	5/108	160/18903	0.00225779211017908	0.00704187052742339	0.0032266407871407	S1PR1/NRP1/PIK3R1/MET/LPAR1	5	0.3125
BP	GO:0051147	regulation of muscle cell differentiation	5/108	160/18903	0.00225779211017908	0.00704187052742339	0.0032266407871407	IGF1/CYP26B1/PROX1/TGFB1/MAPK11	5	0.3125
BP	GO:1990845	adaptive thermogenesis	5/108	160/18903	0.00225779211017908	0.00704187052742339	0.0032266407871407	EPAS1/LEP/CXCR4/VEGFA/LCN2	5	0.3125
BP	GO:0002920	regulation of humoral immune response	3/108	46/18903	0.00230294544579026	0.00715690945540923	0.00327935253406966	CCR7/IL1B/TNF	3	0.652173913043478
BP	GO:0033173	calcineurin-NFAT signaling cascade	3/108	46/18903	0.00230294544579026	0.00715690945540923	0.00327935253406966	IGF1/PPP3CB/TNF	3	0.652173913043478
BP	GO:0046006	regulation of activated T cell proliferation	3/108	46/18903	0.00230294544579026	0.00715690945540923	0.00327935253406966	FOXP3/IGF1/CD24	3	0.652173913043478
BP	GO:2001239	regulation of extrinsic apoptotic signaling pathway in absence of ligand	3/108	46/18903	0.00230294544579026	0.00715690945540923	0.00327935253406966	AKT1/IL1B/TNF	3	0.652173913043478
BP	GO:0010596	negative regulation of endothelial cell migration	4/108	97/18903	0.00232276699514024	0.00721203527997804	0.00330461162301283	FGF2/ACVRL1/TGFB1/TNF	4	0.412371134020619
BP	GO:0019058	viral life cycle	7/108	319/18903	0.0023780041017175	0.00737692670263978	0.0033801661774083	NRP1/PROX1/EPHA2/CXCR4/ITGB1/CCL5/TNF	7	0.219435736677116
BP	GO:0016358	dendrite development	6/108	237/18903	0.00240836945079947	0.00739783937284306	0.00338974852834519	NRP1/ITGB1/LPAR1/ARF6/LAMC2/SEMA4D	6	0.253164556962025
BP	GO:0034764	positive regulation of transmembrane transport	6/108	237/18903	0.00240836945079947	0.00739783937284306	0.00338974852834519	IGF1/PIK3R1/PPP3CB/ITGB1/AKT1/IRS1	6	0.253164556962025
BP	GO:0051952	regulation of amine transport	4/108	98/18903	0.00241109629122156	0.00739783937284306	0.00338974852834519	LEP/CXCL12/ITGB1/TNF	4	0.408163265306122
BP	GO:0002863	positive regulation of inflammatory response to antigenic stimulus	2/108	13/18903	0.00242107221531808	0.00739783937284306	0.00338974852834519	CCR7/TNF	2	1.53846153846154
BP	GO:0010713	negative regulation of collagen metabolic process	2/108	13/18903	0.00242107221531808	0.00739783937284306	0.00338974852834519	IL6/EMILIN1	2	1.53846153846154
BP	GO:0021681	cerebellar granular layer development	2/108	13/18903	0.00242107221531808	0.00739783937284306	0.00338974852834519	PROX1/SERPINE2	2	1.53846153846154
BP	GO:0031272	regulation of pseudopodium assembly	2/108	13/18903	0.00242107221531808	0.00739783937284306	0.00338974852834519	CCL21/CCR7	2	1.53846153846154
BP	GO:0031274	positive regulation of pseudopodium assembly	2/108	13/18903	0.00242107221531808	0.00739783937284306	0.00338974852834519	CCL21/CCR7	2	1.53846153846154
BP	GO:0031392	regulation of prostaglandin biosynthetic process	2/108	13/18903	0.00242107221531808	0.00739783937284306	0.00338974852834519	PTGS2/IL1B	2	1.53846153846154
BP	GO:0060670	branching involved in labyrinthine layer morphogenesis	2/108	13/18903	0.00242107221531808	0.00739783937284306	0.00338974852834519	GRB2/ADM	2	1.53846153846154
BP	GO:0061430	bone trabecula morphogenesis	2/108	13/18903	0.00242107221531808	0.00739783937284306	0.00338974852834519	COL1A1/SEMA4D	2	1.53846153846154
BP	GO:0070486	leukocyte aggregation	2/108	13/18903	0.00242107221531808	0.00739783937284306	0.00338974852834519	SEMA4D/IL1B	2	1.53846153846154
BP	GO:0072537	fibroblast activation	2/108	13/18903	0.00242107221531808	0.00739783937284306	0.00338974852834519	LEP/RPS6KA1	2	1.53846153846154
BP	GO:0097475	motor neuron migration	2/108	13/18903	0.00242107221531808	0.00739783937284306	0.00338974852834519	NRP1/VEGFA	2	1.53846153846154
BP	GO:1901862	negative regulation of muscle tissue development	2/108	13/18903	0.00242107221531808	0.00739783937284306	0.00338974852834519	TGFB1/TWIST1	2	1.53846153846154
BP	GO:1903054	negative regulation of extracellular matrix organization	2/108	13/18903	0.00242107221531808	0.00739783937284306	0.00338974852834519	TGFB1/EMILIN1	2	1.53846153846154
BP	GO:1904995	negative regulation of leukocyte adhesion to vascular endothelial cell	2/108	13/18903	0.00242107221531808	0.00739783937284306	0.00338974852834519	CXCL12/CCL21	2	1.53846153846154
BP	GO:0043254	regulation of protein-containing complex assembly	8/108	410/18903	0.00244010934564034	0.00744625389783014	0.00341193244672383	MET/GRB2/CCL21/CCR7/ARF6/TGFB1/VEGFA/TNF	8	0.195121951219512
BP	GO:0001774	microglial cell activation	3/108	47/18903	0.00244982183409258	0.00744625389783014	0.00341193244672383	IL6/JUN/TNF	3	0.638297872340425
BP	GO:0036230	granulocyte activation	3/108	47/18903	0.00244982183409258	0.00744625389783014	0.00341193244672383	CCL5/PLA2G2A/TNF	3	0.638297872340425
BP	GO:0060711	labyrinthine layer development	3/108	47/18903	0.00244982183409258	0.00744625389783014	0.00341193244672383	GRB2/ADM/AKT1	3	0.638297872340425
BP	GO:0070849	response to epidermal growth factor	3/108	47/18903	0.00244982183409258	0.00744625389783014	0.00341193244672383	COL1A1/ERBB2/AKT1	3	0.638297872340425
BP	GO:1902622	regulation of neutrophil migration	3/108	47/18903	0.00244982183409258	0.00744625389783014	0.00341193244672383	CCL21/CCR7/CCL19	3	0.638297872340425
BP	GO:0045137	development of primary sexual characteristics	6/108	238/18903	0.00245939161463197	0.00746878400864549	0.0034222559217455	LEP/ADAMTS1/KDR/VEGFA/RETN/NKX3-1	6	0.252100840336134
BP	GO:0061326	renal tubule development	4/108	99/18903	0.00250171100694365	0.00759064286243552	0.0034780926126335	FGF2/CD24/VEGFA/SIX1	4	0.404040404040404
BP	GO:0021915	neural tube development	5/108	164/18903	0.00251298563416886	0.00761151029351933	0.00348765423464794	PROX1/EPHA2/TGFB1/ADM/TWIST1	5	0.304878048780488
BP	GO:0061572	actin filament bundle organization	5/108	164/18903	0.00251298563416886	0.00761151029351933	0.00348765423464794	S1PR1/NRP1/PIK3R1/MET/LPAR1	5	0.304878048780488
BP	GO:0036473	cell death in response to oxidative stress	4/108	100/18903	0.00259464060482195	0.00782066950234853	0.00358349263888815	MET/AKT1/HGF/TNF	4	0.4
BP	GO:0048709	oligodendrocyte differentiation	4/108	100/18903	0.00259464060482195	0.00782066950234853	0.00358349263888815	NTRK2/ERBB2/CXCR4/LPAR1	4	0.4
BP	GO:0032620	interleukin-17 production	3/108	48/18903	0.00260237182747126	0.00782066950234853	0.00358349263888815	FOXP3/IL6/TGFB1	3	0.625
BP	GO:0032660	regulation of interleukin-17 production	3/108	48/18903	0.00260237182747126	0.00782066950234853	0.00358349263888815	FOXP3/IL6/TGFB1	3	0.625
BP	GO:0032892	positive regulation of organic acid transport	3/108	48/18903	0.00260237182747126	0.00782066950234853	0.00358349263888815	PLA2G10/ITGB1/IL1B	3	0.625
BP	GO:0046850	regulation of bone remodeling	3/108	48/18903	0.00260237182747126	0.00782066950234853	0.00358349263888815	LEP/S1PR1/IL6	3	0.625
BP	GO:0048483	autonomic nervous system development	3/108	48/18903	0.00260237182747126	0.00782066950234853	0.00358349263888815	FN1/NRP1/SIX1	3	0.625
BP	GO:1902003	regulation of amyloid-beta formation	3/108	48/18903	0.00260237182747126	0.00782066950234853	0.00358349263888815	IGF1/NTRK2/TNF	3	0.625
BP	GO:1903587	regulation of blood vessel endothelial cell proliferation involved in sprouting angiogenesis	3/108	48/18903	0.00260237182747126	0.00782066950234853	0.00358349263888815	FGF2/VEGFA/GATA2	3	0.625
BP	GO:0009062	fatty acid catabolic process	4/108	101/18903	0.00268991442056676	0.0080627564709975	0.00369441880318442	LEP/AKT1/TWIST1/IRS1	4	0.396039603960396
BP	GO:0015908	fatty acid transport	4/108	101/18903	0.00268991442056676	0.0080627564709975	0.00369441880318442	PLA2G10/AKT1/PLA2G2A/IL1B	4	0.396039603960396
BP	GO:2001243	negative regulation of intrinsic apoptotic signaling pathway	4/108	101/18903	0.00268991442056676	0.0080627564709975	0.00369441880318442	CXCL12/MMP9/AKT1/PTGS2	4	0.396039603960396
BP	GO:0050798	activated T cell proliferation	3/108	49/18903	0.00276066797085476	0.00826767518607194	0.00378831417963769	FOXP3/IGF1/CD24	3	0.612244897959184
BP	GO:0071496	cellular response to external stimulus	7/108	328/18903	0.00277653535119314	0.00830800811221318	0.00380679504548794	LEP/COL1A1/POSTN/FGF2/PTGS2/ITGA4/IL1B	7	0.213414634146341
BP	GO:0008630	intrinsic apoptotic signaling pathway in response to DNA damage	4/108	102/18903	0.00278756165874942	0.00831966169045666	0.00381213480723591	CXCL12/PIK3R1/EPHA2/TNF	4	0.392156862745098
BP	GO:0014841	skeletal muscle satellite cell proliferation	2/108	14/18903	0.00281407389934279	0.00831966169045666	0.00381213480723591	FGF2/SIX1	2	1.42857142857143
BP	GO:0030213	hyaluronan biosynthetic process	2/108	14/18903	0.00281407389934279	0.00831966169045666	0.00381213480723591	TGFB1/IL1B	2	1.42857142857143
BP	GO:0032306	regulation of prostaglandin secretion	2/108	14/18903	0.00281407389934279	0.00831966169045666	0.00381213480723591	PLA2G10/IL1B	2	1.42857142857143
BP	GO:0032308	positive regulation of prostaglandin secretion	2/108	14/18903	0.00281407389934279	0.00831966169045666	0.00381213480723591	PLA2G10/IL1B	2	1.42857142857143
BP	GO:0034111	negative regulation of homotypic cell-cell adhesion	2/108	14/18903	0.00281407389934279	0.00831966169045666	0.00381213480723591	CD9/SERPINE2	2	1.42857142857143
BP	GO:0035630	bone mineralization involved in bone maturation	2/108	14/18903	0.00281407389934279	0.00831966169045666	0.00381213480723591	LEP/IGF1	2	1.42857142857143
BP	GO:0043584	nose development	2/108	14/18903	0.00281407389934279	0.00831966169045666	0.00381213480723591	PROX1/SIX1	2	1.42857142857143
BP	GO:0043922	negative regulation by host of viral transcription	2/108	14/18903	0.00281407389934279	0.00831966169045666	0.00381213480723591	JUN/CCL5	2	1.42857142857143
BP	GO:0051547	regulation of keratinocyte migration	2/108	14/18903	0.00281407389934279	0.00831966169045666	0.00381213480723591	MMP9/ARF6	2	1.42857142857143
BP	GO:0070141	response to UV-A	2/108	14/18903	0.00281407389934279	0.00831966169045666	0.00381213480723591	MMP9/AKT1	2	1.42857142857143
BP	GO:0070307	lens fiber cell development	2/108	14/18903	0.00281407389934279	0.00831966169045666	0.00381213480723591	PROX1/EPHA2	2	1.42857142857143
BP	GO:1901298	regulation of hydrogen peroxide-mediated programmed cell death	2/108	14/18903	0.00281407389934279	0.00831966169045666	0.00381213480723591	MET/HGF	2	1.42857142857143
BP	GO:1902947	regulation of tau-protein kinase activity	2/108	14/18903	0.00281407389934279	0.00831966169045666	0.00381213480723591	EGR1/HGF	2	1.42857142857143
BP	GO:0006875	cellular metal ion homeostasis	8/108	420/18903	0.00282861112763831	0.00835550488385992	0.00382855844202527	SCARA5/CXCL12/FGF2/CCL21/CCR7/CCL5/CCL19/LCN2	8	0.19047619047619
BP	GO:1902904	negative regulation of supramolecular fiber organization	5/108	169/18903	0.00286069982690379	0.00844308849168023	0.00386868994404272	S1PR1/PIK3R1/MET/PIK3CA/EMILIN1	5	0.29585798816568
BP	GO:0019233	sensory perception of pain	4/108	103/18903	0.00288761138856432	0.00850800904443377	0.00389843705493074	CXCL12/CXCR4/PTGS2/TNF	4	0.388349514563107
BP	GO:0048144	fibroblast proliferation	4/108	103/18903	0.00288761138856432	0.00850800904443377	0.00389843705493074	VEGFD/FN1/IGF1/JUN	4	0.388349514563107
BP	GO:0002269	leukocyte activation involved in inflammatory response	3/108	50/18903	0.00292478103814512	0.00858101013055798	0.003931886730138	IL6/JUN/TNF	3	0.6
BP	GO:0006692	prostanoid metabolic process	3/108	50/18903	0.00292478103814512	0.00858101013055798	0.003931886730138	PLA2G10/PTGS2/IL1B	3	0.6
BP	GO:0006693	prostaglandin metabolic process	3/108	50/18903	0.00292478103814512	0.00858101013055798	0.003931886730138	PLA2G10/PTGS2/IL1B	3	0.6
BP	GO:0030195	negative regulation of blood coagulation	3/108	50/18903	0.00292478103814512	0.00858101013055798	0.003931886730138	CD9/SERPINE1/SERPINE2	3	0.6
BP	GO:0061082	myeloid leukocyte cytokine production	3/108	50/18903	0.00292478103814512	0.00858101013055798	0.003931886730138	SEMA7A/TGFB1/TWIST1	3	0.6
BP	GO:0034250	positive regulation of cellular amide metabolic process	5/108	170/18903	0.00293421510068064	0.00859412240148593	0.00393789487641439	ELAVL1/IL6/ERBB2/CCL5/TNF	5	0.294117647058824
BP	GO:0050806	positive regulation of synaptic transmission	5/108	170/18903	0.00293421510068064	0.00859412240148593	0.00393789487641439	NTRK2/SERPINE2/PTGS2/RETN/TNF	5	0.294117647058824
BP	GO:0010959	regulation of metal ion transport	8/108	423/18903	0.00295412571972834	0.00864337255208019	0.00396046168505727	CXCL12/PPP3CB/CXCR4/ITGB1/AKT1/SERPINE2/PTGS2/CCL5	8	0.189125295508274
BP	GO:0031330	negative regulation of cellular catabolic process	6/108	247/18903	0.0029560234262458	0.00864337255208019	0.00396046168505727	LEP/ELAVL1/MET/PIK3CA/AKT1/HGF	6	0.242914979757085
BP	GO:0051963	regulation of synapse assembly	4/108	104/18903	0.00299009253968549	0.00872824651972275	0.00399935160850807	NTRK2/ARF6/SEMA4D/SIX1	4	0.384615384615385
BP	GO:1902882	regulation of response to oxidative stress	4/108	104/18903	0.00299009253968549	0.00872824651972275	0.00399935160850807	MET/AKT1/HGF/TNF	4	0.384615384615385
BP	GO:0002440	production of molecular mediator of immune response	7/108	333/18903	0.00301908148688169	0.00880544238212672	0.00403472336339352	FOXP3/IL6/SEMA7A/TGFB1/TWIST1/IL1B/TNF	7	0.21021021021021
BP	GO:2001242	regulation of intrinsic apoptotic signaling pathway	5/108	172/18903	0.00308533245476475	0.00895830146025656	0.00410476460233106	CXCL12/MMP9/AKT1/PTGS2/NKX3-1	5	0.290697674418605
BP	GO:0019083	viral transcription	3/108	51/18903	0.00309478005386102	0.00895830146025656	0.00410476460233106	SMARCA4/JUN/CCL5	3	0.588235294117647
BP	GO:0022602	ovulation cycle process	3/108	51/18903	0.00309478005386102	0.00895830146025656	0.00410476460233106	LEP/ADAMTS1/RETN	3	0.588235294117647
BP	GO:0045058	T cell selection	3/108	51/18903	0.00309478005386102	0.00895830146025656	0.00410476460233106	FOXP3/IL6/CCR7	3	0.588235294117647
BP	GO:0097720	calcineurin-mediated signaling	3/108	51/18903	0.00309478005386102	0.00895830146025656	0.00410476460233106	IGF1/PPP3CB/TNF	3	0.588235294117647
BP	GO:0101023	vascular endothelial cell proliferation	3/108	51/18903	0.00309478005386102	0.00895830146025656	0.00410476460233106	FGF2/FLT1/ITGA4	3	0.588235294117647
BP	GO:1900047	negative regulation of hemostasis	3/108	51/18903	0.00309478005386102	0.00895830146025656	0.00410476460233106	CD9/SERPINE1/SERPINE2	3	0.588235294117647
BP	GO:1903793	positive regulation of anion transport	3/108	51/18903	0.00309478005386102	0.00895830146025656	0.00410476460233106	PLA2G10/ITGB1/IL1B	3	0.588235294117647
BP	GO:1905562	regulation of vascular endothelial cell proliferation	3/108	51/18903	0.00309478005386102	0.00895830146025656	0.00410476460233106	FGF2/FLT1/ITGA4	3	0.588235294117647
BP	GO:0060047	heart contraction	6/108	250/18903	0.00313718017530785	0.00907344842683022	0.00415752585339571	EPAS1/VEGFB/CXCR4/PIK3CA/ADM/TNF	6	0.24
BP	GO:0015837	amine transport	4/108	106/18903	0.00320246410273375	0.00922515037626705	0.00422703688681153	LEP/CXCL12/ITGB1/TNF	4	0.377358490566038
BP	GO:0031331	positive regulation of cellular catabolic process	8/108	429/18903	0.00321819285376154	0.00922515037626705	0.00422703688681153	IGF1/IL6/KDR/AKT1/TWIST1/IRS1/IL1B/TNF	8	0.186480186480186
BP	GO:0003376	sphingosine-1-phosphate receptor signaling pathway	2/108	15/18903	0.00323493141443911	0.00922515037626705	0.00422703688681153	S1PR1/AKT1	2	1.33333333333333
BP	GO:0014857	regulation of skeletal muscle cell proliferation	2/108	15/18903	0.00323493141443911	0.00922515037626705	0.00422703688681153	FGF2/SIX1	2	1.33333333333333
BP	GO:0032352	positive regulation of hormone metabolic process	2/108	15/18903	0.00323493141443911	0.00922515037626705	0.00422703688681153	EGR1/ADM	2	1.33333333333333
BP	GO:0034116	positive regulation of heterotypic cell-cell adhesion	2/108	15/18903	0.00323493141443911	0.00922515037626705	0.00422703688681153	IL1B/TNF	2	1.33333333333333
BP	GO:0035358	regulation of peroxisome proliferator activated receptor signaling pathway	2/108	15/18903	0.00323493141443911	0.00922515037626705	0.00422703688681153	LEP/TWIST1	2	1.33333333333333
BP	GO:0042976	activation of Janus kinase activity	2/108	15/18903	0.00323493141443911	0.00922515037626705	0.00422703688681153	GHR/CCL5	2	1.33333333333333
BP	GO:0048934	peripheral nervous system neuron differentiation	2/108	15/18903	0.00323493141443911	0.00922515037626705	0.00422703688681153	NTRK2/HOXD10	2	1.33333333333333
BP	GO:0048935	peripheral nervous system neuron development	2/108	15/18903	0.00323493141443911	0.00922515037626705	0.00422703688681153	NTRK2/HOXD10	2	1.33333333333333
BP	GO:0051956	negative regulation of amino acid transport	2/108	15/18903	0.00323493141443911	0.00922515037626705	0.00422703688681153	LEP/TNF	2	1.33333333333333
BP	GO:0060347	heart trabecula formation	2/108	15/18903	0.00323493141443911	0.00922515037626705	0.00422703688681153	TEK/ADAMTS1	2	1.33333333333333
BP	GO:0071599	otic vesicle development	2/108	15/18903	0.00323493141443911	0.00922515037626705	0.00422703688681153	PROX1/SIX1	2	1.33333333333333
BP	GO:0071639	positive regulation of monocyte chemotactic protein-1 production	2/108	15/18903	0.00323493141443911	0.00922515037626705	0.00422703688681153	TWIST1/IL1B	2	1.33333333333333
BP	GO:0072148	epithelial cell fate commitment	2/108	15/18903	0.00323493141443911	0.00922515037626705	0.00422703688681153	NRP1/PROX1	2	1.33333333333333
BP	GO:1902563	regulation of neutrophil activation	2/108	15/18903	0.00323493141443911	0.00922515037626705	0.00422703688681153	PLA2G2A/TNF	2	1.33333333333333
BP	GO:2001279	regulation of unsaturated fatty acid biosynthetic process	2/108	15/18903	0.00323493141443911	0.00922515037626705	0.00422703688681153	PTGS2/IL1B	2	1.33333333333333
BP	GO:0006636	unsaturated fatty acid biosynthetic process	3/108	52/18903	0.0032707323145738	0.00928137317463483	0.00425279861782806	PLA2G10/PTGS2/IL1B	3	0.576923076923077
BP	GO:0010543	regulation of platelet activation	3/108	52/18903	0.0032707323145738	0.00928137317463483	0.00425279861782806	IL6/CD9/SERPINE2	3	0.576923076923077
BP	GO:0010823	negative regulation of mitochondrion organization	3/108	52/18903	0.0032707323145738	0.00928137317463483	0.00425279861782806	IGF1/AKT1/HGF	3	0.576923076923077
BP	GO:0021872	forebrain generation of neurons	3/108	52/18903	0.0032707323145738	0.00928137317463483	0.00425279861782806	NRP1/PROX1/GATA2	3	0.576923076923077
BP	GO:0048013	ephrin receptor signaling pathway	3/108	52/18903	0.0032707323145738	0.00928137317463483	0.00425279861782806	MMP9/EPHA2/TIAM1	3	0.576923076923077
BP	GO:0060612	adipose tissue development	3/108	52/18903	0.0032707323145738	0.00928137317463483	0.00425279861782806	LEP/PIK3CA/TBL1XR1	3	0.576923076923077
BP	GO:0010906	regulation of glucose metabolic process	4/108	107/18903	0.00331241164041765	0.00939194848413259	0.00430346509945204	LEP/IGF1/AKT1/IRS1	4	0.373831775700935
BP	GO:0050808	synapse organization	8/108	432/18903	0.00335694647491588	0.00951043264824777	0.00435775548083231	NRP1/NTRK2/ERBB2/ARF6/SEMA4D/SIX1/CDH1/TNF	8	0.185185185185185
BP	GO:0006869	lipid transport	8/108	433/18903	0.0034042183033853	0.00962101039053658	0.0044084230771804	LEP/PLA2G10/AKT1/PTGS2/PLA2G2A/RETN/NKX3-1/IL1B	8	0.184757505773672
BP	GO:0050680	negative regulation of epithelial cell proliferation	5/108	176/18903	0.00340431476845965	0.00962101039053658	0.0044084230771804	ACVRL1/FLT1/TGFB1/NKX3-1/TNF	5	0.284090909090909
BP	GO:1901136	carbohydrate derivative catabolic process	5/108	176/18903	0.00340431476845965	0.00962101039053658	0.0044084230771804	LYVE1/FGF2/TYMP/TGFB1/HPSE	5	0.284090909090909
BP	GO:0008637	apoptotic mitochondrial changes	4/108	108/18903	0.00342490484327763	0.00965555420800257	0.00442425132763534	IGF1/MMP9/AKT1/HGF	4	0.37037037037037
BP	GO:0051341	regulation of oxidoreductase activity	4/108	108/18903	0.00342490484327763	0.00965555420800257	0.00442425132763534	LEP/AKT1/IL1B/TNF	4	0.37037037037037
BP	GO:1902106	negative regulation of leukocyte differentiation	4/108	108/18903	0.00342490484327763	0.00965555420800257	0.00442425132763534	FOXP3/PIK3R1/ERBB2/GATA2	4	0.37037037037037
BP	GO:0048146	positive regulation of fibroblast proliferation	3/108	53/18903	0.00345270341013875	0.00971550138349042	0.00445171959771354	FN1/IGF1/JUN	3	0.566037735849057
BP	GO:2000677	regulation of transcription regulatory region DNA binding	3/108	53/18903	0.00345270341013875	0.00971550138349042	0.00445171959771354	IGF1/TGFB1/TWIST1	3	0.566037735849057
BP	GO:0021537	telencephalon development	6/108	255/18903	0.00345739390654541	0.00971550138349042	0.00445171959771354	CXCL12/NTRK2/SEMA7A/PROX1/CXCR4/LPAR1	6	0.235294117647059
BP	GO:0043122	regulation of I-kappaB kinase/NF-kappaB signaling	6/108	255/18903	0.00345739390654541	0.00971550138349042	0.00445171959771354	CCL21/CCR7/LPAR1/CCL19/IL1B/TNF	6	0.235294117647059
BP	GO:0019827	stem cell population maintenance	5/108	177/18903	0.00348763281163085	0.0097925261912944	0.00448701297402799	ELAVL1/SMARCA4/PROX1/LOXL2/GATA2	5	0.282485875706215
BP	GO:0042116	macrophage activation	4/108	109/18903	0.00353997188446276	0.00993142841491903	0.00455065907181215	IL6/JUN/PLA2G10/TNF	4	0.36697247706422
BP	GO:0006694	steroid biosynthetic process	5/108	178/18903	0.00357240840708497	0.00999812280139707	0.00458121896734634	LEP/EGR1/PROX1/ADM/TNF	5	0.280898876404494
BP	GO:0048736	appendage development	5/108	178/18903	0.00357240840708497	0.00999812280139707	0.00458121896734634	CYP26B1/TWIST1/HOXD10/ITGA6/RSPO2	5	0.280898876404494
BP	GO:0060173	limb development	5/108	178/18903	0.00357240840708497	0.00999812280139707	0.00458121896734634	CYP26B1/TWIST1/HOXD10/ITGA6/RSPO2	5	0.280898876404494
BP	GO:0030857	negative regulation of epithelial cell differentiation	3/108	54/18903	0.00364075724472276	0.0101123334615787	0.0046335511954146	ACVRL1/MMP9/VEGFA	3	0.555555555555556
BP	GO:0045744	negative regulation of G protein-coupled receptor signaling pathway	3/108	54/18903	0.00364075724472276	0.0101123334615787	0.0046335511954146	MET/ADM/CCL5	3	0.555555555555556
BP	GO:0050819	negative regulation of coagulation	3/108	54/18903	0.00364075724472276	0.0101123334615787	0.0046335511954146	CD9/SERPINE1/SERPINE2	3	0.555555555555556
BP	GO:1902743	regulation of lamellipodium organization	3/108	54/18903	0.00364075724472276	0.0101123334615787	0.0046335511954146	PIK3R1/EPHA2/PIK3CA	3	0.555555555555556
BP	GO:0005976	polysaccharide metabolic process	4/108	110/18903	0.00365764077466094	0.0101123334615787	0.0046335511954146	IGF1/TGFB1/AKT1/IRS1	4	0.363636363636364
BP	GO:0019395	fatty acid oxidation	4/108	110/18903	0.00365764077466094	0.0101123334615787	0.0046335511954146	LEP/AKT1/TWIST1/IRS1	4	0.363636363636364
BP	GO:0045833	negative regulation of lipid metabolic process	4/108	110/18903	0.00365764077466094	0.0101123334615787	0.0046335511954146	PROX1/AKT1/IL1B/TNF	4	0.363636363636364
BP	GO:0010421	hydrogen peroxide-mediated programmed cell death	2/108	16/18903	0.0036833196115109	0.0101123334615787	0.0046335511954146	MET/HGF	2	1.25
BP	GO:0010715	regulation of extracellular matrix disassembly	2/108	16/18903	0.0036833196115109	0.0101123334615787	0.0046335511954146	IL6/TGFB1	2	1.25
BP	GO:0010820	positive regulation of T cell chemotaxis	2/108	16/18903	0.0036833196115109	0.0101123334615787	0.0046335511954146	CCL21/CCL5	2	1.25
BP	GO:0021783	preganglionic parasympathetic fiber development	2/108	16/18903	0.0036833196115109	0.0101123334615787	0.0046335511954146	NRP1/SIX1	2	1.25
BP	GO:0021984	adenohypophysis development	2/108	16/18903	0.0036833196115109	0.0101123334615787	0.0046335511954146	FGF2/GATA2	2	1.25
BP	GO:0031269	pseudopodium assembly	2/108	16/18903	0.0036833196115109	0.0101123334615787	0.0046335511954146	CCL21/CCR7	2	1.25
BP	GO:0034112	positive regulation of homotypic cell-cell adhesion	2/108	16/18903	0.0036833196115109	0.0101123334615787	0.0046335511954146	IL6/CCL5	2	1.25
BP	GO:0034374	low-density lipoprotein particle remodeling	2/108	16/18903	0.0036833196115109	0.0101123334615787	0.0046335511954146	PLA2G10/PLA2G2A	2	1.25
BP	GO:0042448	progesterone metabolic process	2/108	16/18903	0.0036833196115109	0.0101123334615787	0.0046335511954146	EGR1/ADM	2	1.25
BP	GO:0046321	positive regulation of fatty acid oxidation	2/108	16/18903	0.0036833196115109	0.0101123334615787	0.0046335511954146	TWIST1/IRS1	2	1.25
BP	GO:0046325	negative regulation of glucose import	2/108	16/18903	0.0036833196115109	0.0101123334615787	0.0046335511954146	LEP/TNF	2	1.25
BP	GO:0050965	detection of temperature stimulus involved in sensory perception of pain	2/108	16/18903	0.0036833196115109	0.0101123334615787	0.0046335511954146	CXCL12/CXCR4	2	1.25
BP	GO:0051044	positive regulation of membrane protein ectodomain proteolysis	2/108	16/18903	0.0036833196115109	0.0101123334615787	0.0046335511954146	IL1B/TNF	2	1.25
BP	GO:0061101	neuroendocrine cell differentiation	2/108	16/18903	0.0036833196115109	0.0101123334615787	0.0046335511954146	FGF2/GATA2	2	1.25
BP	GO:0090336	positive regulation of brown fat cell differentiation	2/108	16/18903	0.0036833196115109	0.0101123334615787	0.0046335511954146	PTGS2/SIX1	2	1.25
BP	GO:2000696	regulation of epithelial cell differentiation involved in kidney development	2/108	16/18903	0.0036833196115109	0.0101123334615787	0.0046335511954146	MMP9/CD24	2	1.25
BP	GO:2001212	regulation of vasculogenesis	2/108	16/18903	0.0036833196115109	0.0101123334615787	0.0046335511954146	KDR/ADM	2	1.25
BP	GO:0031532	actin cytoskeleton reorganization	4/108	111/18903	0.00377793935858412	0.0103638875272728	0.00474881525847549	S1PR1/TEK/NRP1/GRB2	4	0.36036036036036
BP	GO:1902991	regulation of amyloid precursor protein catabolic process	3/108	55/18903	0.00383495605763051	0.0104953500960607	0.00480905244755497	IGF1/NTRK2/TNF	3	0.545454545454545
BP	GO:1903202	negative regulation of oxidative stress-induced cell death	3/108	55/18903	0.00383495605763051	0.0104953500960607	0.00480905244755497	MET/AKT1/HGF	3	0.545454545454545
BP	GO:2000648	positive regulation of stem cell proliferation	3/108	55/18903	0.00383495605763051	0.0104953500960607	0.00480905244755497	FGF2/KDR/VEGFC	3	0.545454545454545
BP	GO:0003015	heart process	6/108	261/18903	0.00387310942738989	0.0105913940265591	0.004853060536357	EPAS1/VEGFB/CXCR4/PIK3CA/ADM/TNF	6	0.229885057471264
BP	GO:0097553	calcium ion transmembrane import into cytosol	5/108	182/18903	0.00392637154475818	0.0107285700773108	0.00491591568807426	FGF2/PPP3CB/CCL21/CCR7/CCL19	5	0.274725274725275
BP	GO:0002456	T cell mediated immunity	4/108	113/18903	0.00402653613607965	0.0109744052292912	0.00502855929962657	FOXP3/IL6/PPP3CB/IL1B	4	0.353982300884956
BP	GO:0010633	negative regulation of epithelial cell migration	4/108	113/18903	0.00402653613607965	0.0109744052292912	0.00502855929962657	FGF2/ACVRL1/TGFB1/TNF	4	0.353982300884956
BP	GO:1905954	positive regulation of lipid localization	4/108	113/18903	0.00402653613607965	0.0109744052292912	0.00502855929962657	PLA2G10/RETN/NKX3-1/IL1B	4	0.353982300884956
BP	GO:0010676	positive regulation of cellular carbohydrate metabolic process	3/108	56/18903	0.00403536044393058	0.0109744052292912	0.00502855929962657	IGF1/AKT1/IRS1	3	0.535714285714286
BP	GO:0021545	cranial nerve development	3/108	56/18903	0.00403536044393058	0.0109744052292912	0.00502855929962657	NRP1/LPAR1/SIX1	3	0.535714285714286
BP	GO:0034205	amyloid-beta formation	3/108	56/18903	0.00403536044393058	0.0109744052292912	0.00502855929962657	IGF1/NTRK2/TNF	3	0.535714285714286
BP	GO:0007416	synapse assembly	5/108	184/18903	0.00411246889697976	0.0111490738616632	0.00510859384886329	NTRK2/ARF6/SEMA4D/SIX1/CDH1	5	0.271739130434783
BP	GO:0050728	negative regulation of inflammatory response	5/108	184/18903	0.00411246889697976	0.0111490738616632	0.00510859384886329	TEK/FOXP3/IGF1/PLA2G10/HGF	5	0.271739130434783
BP	GO:1902107	positive regulation of leukocyte differentiation	5/108	184/18903	0.00411246889697976	0.0111490738616632	0.00510859384886329	FOXP3/SMARCA4/TGFB1/CCL19/TNF	5	0.271739130434783
BP	GO:1903708	positive regulation of hemopoiesis	5/108	184/18903	0.00411246889697976	0.0111490738616632	0.00510859384886329	FOXP3/SMARCA4/TGFB1/CCL19/TNF	5	0.271739130434783
BP	GO:1903707	negative regulation of hemopoiesis	4/108	114/18903	0.00415488915874796	0.0111700290887351	0.00511819569969404	FOXP3/PIK3R1/ERBB2/GATA2	4	0.350877192982456
BP	GO:0010566	regulation of ketone biosynthetic process	2/108	17/18903	0.00415891608763128	0.0111700290887351	0.00511819569969404	EGR1/ADM	2	1.17647058823529
BP	GO:0010819	regulation of T cell chemotaxis	2/108	17/18903	0.00415891608763128	0.0111700290887351	0.00511819569969404	CCL21/CCL5	2	1.17647058823529
BP	GO:0016202	regulation of striated muscle tissue development	2/108	17/18903	0.00415891608763128	0.0111700290887351	0.00511819569969404	TGFB1/TWIST1	2	1.17647058823529
BP	GO:0031268	pseudopodium organization	2/108	17/18903	0.00415891608763128	0.0111700290887351	0.00511819569969404	CCL21/CCR7	2	1.17647058823529
BP	GO:0035729	cellular response to hepatocyte growth factor stimulus	2/108	17/18903	0.00415891608763128	0.0111700290887351	0.00511819569969404	NRP1/HGF	2	1.17647058823529
BP	GO:0043923	positive regulation by host of viral transcription	2/108	17/18903	0.00415891608763128	0.0111700290887351	0.00511819569969404	SMARCA4/JUN	2	1.17647058823529
BP	GO:0061548	ganglion development	2/108	17/18903	0.00415891608763128	0.0111700290887351	0.00511819569969404	NRP1/SIX1	2	1.17647058823529
BP	GO:0070206	protein trimerization	2/108	17/18903	0.00415891608763128	0.0111700290887351	0.00511819569969404	SCARA5/COL1A2	2	1.17647058823529
BP	GO:0090399	replicative senescence	2/108	17/18903	0.00415891608763128	0.0111700290887351	0.00511819569969404	CDKN2A/SERPINE1	2	1.17647058823529
BP	GO:0097468	programmed cell death in response to reactive oxygen species	2/108	17/18903	0.00415891608763128	0.0111700290887351	0.00511819569969404	MET/HGF	2	1.17647058823529
BP	GO:0098712	L-glutamate import across plasma membrane	2/108	17/18903	0.00415891608763128	0.0111700290887351	0.00511819569969404	ITGB1/TNF	2	1.17647058823529
BP	GO:0035196	miRNA processing	3/108	57/18903	0.00424202937488337	0.0113756047218019	0.00521239208116861	IL6/TGFB1/TNF	3	0.526315789473684
BP	GO:0045071	negative regulation of viral genome replication	3/108	57/18903	0.00424202937488337	0.0113756047218019	0.00521239208116861	PROX1/CCL5/TNF	3	0.526315789473684
BP	GO:0034766	negative regulation of ion transmembrane transport	4/108	115/18903	0.00428598152688915	0.0114845727910915	0.00526232211261362	MMP9/PPP3CB/TWIST1/TNF	4	0.347826086956522
BP	GO:0006109	regulation of carbohydrate metabolic process	5/108	186/18903	0.00430479495812345	0.0115260635305672	0.00528133349769368	LEP/IGF1/TGFB1/AKT1/IRS1	5	0.268817204301075
BP	GO:0034440	lipid oxidation	4/108	116/18903	0.00441984020555289	0.0118067027713149	0.00540992461807035	LEP/AKT1/TWIST1/IRS1	4	0.344827586206897
BP	GO:0051702	biological process involved in interaction with symbiont	4/108	116/18903	0.00441984020555289	0.0118067027713149	0.00540992461807035	FN1/SMARCA4/JUN/CCL5	4	0.344827586206897
BP	GO:0072009	nephron epithelium development	4/108	116/18903	0.00441984020555289	0.0118067027713149	0.00540992461807035	FGF2/CD24/VEGFA/SIX1	4	0.344827586206897
BP	GO:0031529	ruffle organization	3/108	58/18903	0.00445502021817223	0.0118640615348556	0.00543620685731624	CCL21/CCR7/ARF6	3	0.517241379310345
BP	GO:0033619	membrane protein proteolysis	3/108	58/18903	0.00445502021817223	0.0118640615348556	0.00543620685731624	TGFB1/IL1B/TNF	3	0.517241379310345
BP	GO:0048016	inositol phosphate-mediated signaling	3/108	58/18903	0.00445502021817223	0.0118640615348556	0.00543620685731624	IGF1/PPP3CB/TNF	3	0.517241379310345
BP	GO:0060350	endochondral bone morphogenesis	3/108	58/18903	0.00445502021817223	0.0118640615348556	0.00543620685731624	GHR/COL1A1/FGFR3	3	0.517241379310345
BP	GO:0071478	cellular response to radiation	5/108	189/18903	0.0046052106104489	0.0122441356872786	0.00561035984089784	EGR1/PIK3R1/MMP9/GRB2/PTGS2	5	0.264550264550265
BP	GO:0003002	regionalization	7/108	360/18903	0.00462141526895531	0.0122441356872786	0.00561035984089784	FGF2/NRP1/CYP26B1/ACVRL1/HOXD10/SIX1/NKX3-1	7	0.194444444444444
BP	GO:0071560	cellular response to transforming growth factor beta stimulus	6/108	271/18903	0.00464695038073727	0.0122441356872786	0.00561035984089784	COL1A1/ACVRL1/JUN/COL1A2/TGFB1/EMILIN1	6	0.22140221402214
BP	GO:0003159	morphogenesis of an endothelium	2/108	18/18903	0.00466140116575195	0.0122441356872786	0.00561035984089784	ACVRL1/CXCR4	2	1.11111111111111
BP	GO:0010755	regulation of plasminogen activation	2/108	18/18903	0.00466140116575195	0.0122441356872786	0.00561035984089784	SERPINE1/SERPINE2	2	1.11111111111111
BP	GO:0010958	regulation of amino acid import across plasma membrane	2/108	18/18903	0.00466140116575195	0.0122441356872786	0.00561035984089784	ITGB1/TNF	2	1.11111111111111
BP	GO:0030730	sequestering of triglyceride	2/108	18/18903	0.00466140116575195	0.0122441356872786	0.00561035984089784	IL1B/TNF	2	1.11111111111111
BP	GO:0035067	negative regulation of histone acetylation	2/108	18/18903	0.00466140116575195	0.0122441356872786	0.00561035984089784	FOXP3/TWIST1	2	1.11111111111111
BP	GO:0043116	negative regulation of vascular permeability	2/108	18/18903	0.00466140116575195	0.0122441356872786	0.00561035984089784	ADM/VEGFA	2	1.11111111111111
BP	GO:0043117	positive regulation of vascular permeability	2/108	18/18903	0.00466140116575195	0.0122441356872786	0.00561035984089784	TGFB1/VEGFA	2	1.11111111111111
BP	GO:0043217	myelin maintenance	2/108	18/18903	0.00466140116575195	0.0122441356872786	0.00561035984089784	CXCR4/AKT1	2	1.11111111111111
BP	GO:0048486	parasympathetic nervous system development	2/108	18/18903	0.00466140116575195	0.0122441356872786	0.00561035984089784	NRP1/SIX1	2	1.11111111111111
BP	GO:0048569	post-embryonic animal organ development	2/108	18/18903	0.00466140116575195	0.0122441356872786	0.00561035984089784	KDR/VEGFA	2	1.11111111111111
BP	GO:0060644	mammary gland epithelial cell differentiation	2/108	18/18903	0.00466140116575195	0.0122441356872786	0.00561035984089784	FGF2/AKT1	2	1.11111111111111
BP	GO:0061154	endothelial tube morphogenesis	2/108	18/18903	0.00466140116575195	0.0122441356872786	0.00561035984089784	ACVRL1/CXCR4	2	1.11111111111111
BP	GO:0090190	positive regulation of branching involved in ureteric bud morphogenesis	2/108	18/18903	0.00466140116575195	0.0122441356872786	0.00561035984089784	VEGFA/SIX1	2	1.11111111111111
BP	GO:0090520	sphingolipid mediated signaling pathway	2/108	18/18903	0.00466140116575195	0.0122441356872786	0.00561035984089784	S1PR1/AKT1	2	1.11111111111111
BP	GO:1903789	regulation of amino acid transmembrane transport	2/108	18/18903	0.00466140116575195	0.0122441356872786	0.00561035984089784	ITGB1/TNF	2	1.11111111111111
BP	GO:0006611	protein export from nucleus	3/108	59/18903	0.00467438875793982	0.0122596468787785	0.00561746719155926	PTPN14/TGFB1/IL1B	3	0.508474576271186
BP	GO:0051785	positive regulation of nuclear division	3/108	59/18903	0.00467438875793982	0.0122596468787785	0.00561746719155926	IGF1/IL1B/TNF	3	0.508474576271186
BP	GO:0030326	embryonic limb morphogenesis	4/108	118/18903	0.0046959634251195	0.0122883033845531	0.00563059782921995	CYP26B1/TWIST1/HOXD10/RSPO2	4	0.338983050847458
BP	GO:0035113	embryonic appendage morphogenesis	4/108	118/18903	0.0046959634251195	0.0122883033845531	0.00563059782921995	CYP26B1/TWIST1/HOXD10/RSPO2	4	0.338983050847458
BP	GO:0071346	cellular response to interferon-gamma	4/108	118/18903	0.0046959634251195	0.0122883033845531	0.00563059782921995	CCL21/CCL5/CCL19/TNF	4	0.338983050847458
BP	GO:0043433	negative regulation of DNA-binding transcription factor activity	5/108	190/18903	0.0047085860342455	0.0123120278327477	0.00564146855907773	FOXP3/CDKN2A/PROX1/PLA2G10/TWIST1	5	0.263157894736842
BP	GO:0045787	positive regulation of cell cycle	7/108	362/18903	0.00476155382250798	0.0124411315724699	0.0057006249140175	ADAMTS1/IGF1/PROX1/AKT1/NKX3-1/IL1B/TNF	7	0.193370165745856
BP	GO:0032609	interferon-gamma production	4/108	119/18903	0.00483828095784406	0.012622553636817	0.00578375393921469	FOXP3/CCR7/IL1B/TNF	4	0.336134453781513
BP	GO:0032649	regulation of interferon-gamma production	4/108	119/18903	0.00483828095784406	0.012622553636817	0.00578375393921469	FOXP3/CCR7/IL1B/TNF	4	0.336134453781513
BP	GO:0001658	branching involved in ureteric bud morphogenesis	3/108	60/18903	0.00490018921463094	0.012716982804387	0.00582702213086785	FGF2/VEGFA/SIX1	3	0.5
BP	GO:0002011	morphogenesis of an epithelial sheet	3/108	60/18903	0.00490018921463094	0.012716982804387	0.00582702213086785	ACVRL1/SOS1/ITGB1	3	0.5
BP	GO:0002711	positive regulation of T cell mediated immunity	3/108	60/18903	0.00490018921463094	0.012716982804387	0.00582702213086785	FOXP3/IL6/IL1B	3	0.5
BP	GO:0046686	response to cadmium ion	3/108	60/18903	0.00490018921463094	0.012716982804387	0.00582702213086785	MMP9/JUN/AKT1	3	0.5
BP	GO:0051353	positive regulation of oxidoreductase activity	3/108	60/18903	0.00490018921463094	0.012716982804387	0.00582702213086785	AKT1/IL1B/TNF	3	0.5
BP	GO:0055008	cardiac muscle tissue morphogenesis	3/108	60/18903	0.00490018921463094	0.012716982804387	0.00582702213086785	S1PR1/PROX1/TGFB1	3	0.5
BP	GO:1905517	macrophage migration	3/108	60/18903	0.00490018921463094	0.012716982804387	0.00582702213086785	CD9/CCL5/EMILIN1	3	0.5
BP	GO:0048839	inner ear development	5/108	193/18903	0.00502861977522643	0.0130405106081153	0.00597526513011333	FGF2/PROX1/SIX1/CEBPD/GATA2	5	0.259067357512953
BP	GO:0010639	negative regulation of organelle organization	7/108	366/18903	0.00505144373811062	0.0130898938782477	0.00599789293518177	S1PR1/IGF1/PIK3R1/MET/PIK3CA/AKT1/HGF	7	0.191256830601093
BP	GO:0002443	leukocyte mediated immunity	8/108	463/18903	0.00507999323785231	0.0131540288627111	0.00602728009246423	LEP/FOXP3/IL6/PPP3CB/TGFB1/IL1B/GATA2/TNF	8	0.172786177105832
BP	GO:0002449	lymphocyte mediated immunity	7/108	367/18903	0.00512595191640956	0.0132404067840512	0.0060668591393977	LEP/FOXP3/IL6/PPP3CB/TGFB1/IL1B/TNF	7	0.190735694822888
BP	GO:0032355	response to estradiol	4/108	121/18903	0.00513155889863615	0.0132404067840512	0.0060668591393977	LEP/COL1A1/TGFB1/PTGS2	4	0.330578512396694
BP	GO:2000278	regulation of DNA biosynthetic process	4/108	121/18903	0.00513155889863615	0.0132404067840512	0.0060668591393977	FGF2/ACVRL1/HGF/TNF	4	0.330578512396694
BP	GO:0046456	icosanoid biosynthetic process	3/108	61/18903	0.00513247426464375	0.0132404067840512	0.0060668591393977	PLA2G10/PTGS2/IL1B	3	0.491803278688525
BP	GO:0070918	small regulatory ncRNA processing	3/108	61/18903	0.00513247426464375	0.0132404067840512	0.0060668591393977	IL6/TGFB1/TNF	3	0.491803278688525
BP	GO:0071559	response to transforming growth factor beta	6/108	277/18903	0.00516282693784459	0.0132615241045733	0.00607653526272977	COL1A1/ACVRL1/JUN/COL1A2/TGFB1/EMILIN1	6	0.216606498194946
BP	GO:0010544	negative regulation of platelet activation	2/108	19/18903	0.00519045787455135	0.0132615241045733	0.00607653526272977	CD9/SERPINE2	2	1.05263157894737
BP	GO:0010744	positive regulation of macrophage derived foam cell differentiation	2/108	19/18903	0.00519045787455135	0.0132615241045733	0.00607653526272977	PLA2G10/PLA2G2A	2	1.05263157894737
BP	GO:0014067	negative regulation of phosphatidylinositol 3-kinase signaling	2/108	19/18903	0.00519045787455135	0.0132615241045733	0.00607653526272977	TWIST1/SERPINE2	2	1.05263157894737
BP	GO:0035728	response to hepatocyte growth factor	2/108	19/18903	0.00519045787455135	0.0132615241045733	0.00607653526272977	NRP1/HGF	2	1.05263157894737
BP	GO:0035743	CD4-positive, alpha-beta T cell cytokine production	2/108	19/18903	0.00519045787455135	0.0132615241045733	0.00607653526272977	IL6/IL1B	2	1.05263157894737
BP	GO:0048245	eosinophil chemotaxis	2/108	19/18903	0.00519045787455135	0.0132615241045733	0.00607653526272977	CCL21/CCL5	2	1.05263157894737
BP	GO:0050961	detection of temperature stimulus involved in sensory perception	2/108	19/18903	0.00519045787455135	0.0132615241045733	0.00607653526272977	CXCL12/CXCR4	2	1.05263157894737
BP	GO:0051797	regulation of hair follicle development	2/108	19/18903	0.00519045787455135	0.0132615241045733	0.00607653526272977	HPSE/TNF	2	1.05263157894737
BP	GO:0060216	definitive hemopoiesis	2/108	19/18903	0.00519045787455135	0.0132615241045733	0.00607653526272977	TEK/GATA2	2	1.05263157894737
BP	GO:0061298	retina vasculature development in camera-type eye	2/108	19/18903	0.00519045787455135	0.0132615241045733	0.00607653526272977	NRP1/ACVRL1	2	1.05263157894737
BP	GO:0090036	regulation of protein kinase C signaling	2/108	19/18903	0.00519045787455135	0.0132615241045733	0.00607653526272977	FLT4/VEGFA	2	1.05263157894737
BP	GO:2000251	positive regulation of actin cytoskeleton reorganization	2/108	19/18903	0.00519045787455135	0.0132615241045733	0.00607653526272977	TEK/NRP1	2	1.05263157894737
BP	GO:0002761	regulation of myeloid leukocyte differentiation	4/108	122/18903	0.00528257112705194	0.0134869183199512	0.00617981267541319	PIK3R1/TGFB1/GATA2/TNF	4	0.327868852459016
BP	GO:0022617	extracellular matrix disassembly	3/108	62/18903	0.0053712950597908	0.0136731055124969	0.00626512512005011	MMP9/IL6/TGFB1	3	0.483870967741935
BP	GO:0031102	neuron projection regeneration	3/108	62/18903	0.0053712950597908	0.0136731055124969	0.00626512512005011	JUN/ADM/HGF	3	0.483870967741935
BP	GO:0046888	negative regulation of hormone secretion	3/108	62/18903	0.0053712950597908	0.0136731055124969	0.00626512512005011	LEP/IRS1/IL1B	3	0.483870967741935
BP	GO:0060393	regulation of pathway-restricted SMAD protein phosphorylation	3/108	62/18903	0.0053712950597908	0.0136731055124969	0.00626512512005011	ACVRL1/TGFB1/EMILIN1	3	0.483870967741935
BP	GO:0044843	cell cycle G1/S phase transition	6/108	280/18903	0.00543599666228355	0.0138087142324647	0.00632726210840228	ADAMTS1/SMARCA4/CDKN2A/ITGB1/AKT1/NKX3-1	6	0.214285714285714
BP	GO:0046887	positive regulation of hormone secretion	4/108	123/18903	0.00543653307303563	0.0138087142324647	0.00632726210840228	LEP/PPP3CB/RETN/NKX3-1	4	0.32520325203252
BP	GO:0090630	activation of GTPase activity	4/108	123/18903	0.00543653307303563	0.0138087142324647	0.00632726210840228	EPHA2/CCL21/CCR7/TIAM1	4	0.32520325203252
BP	GO:0042471	ear morphogenesis	4/108	124/18903	0.00559347014096807	0.0141822197948492	0.00649840531206109	PROX1/TWIST1/SIX1/GATA2	4	0.32258064516129
BP	GO:0051209	release of sequestered calcium ion into cytosol	4/108	124/18903	0.00559347014096807	0.0141822197948492	0.00649840531206109	FGF2/CCL21/CCR7/CCL19	4	0.32258064516129
BP	GO:0071248	cellular response to metal ion	5/108	198/18903	0.0055958729750907	0.0141822197948492	0.00649840531206109	MMP9/JUN/AKT1/PTGS2/CDH1	5	0.252525252525253
BP	GO:0046579	positive regulation of Ras protein signal transduction	3/108	63/18903	0.00561670124657163	0.0142141956985607	0.00651305692411777	IGF1/LPAR1/NGF	3	0.476190476190476
BP	GO:0070542	response to fatty acid	3/108	63/18903	0.00561670124657163	0.0142141956985607	0.00651305692411777	PIK3CA/PTGS2/IRS1	3	0.476190476190476
BP	GO:0007389	pattern specification process	8/108	472/18903	0.00568919987537178	0.0143871511822769	0.0065923064950869	FGF2/NRP1/CYP26B1/ACVRL1/SOX18/HOXD10/SIX1/NKX3-1	8	0.169491525423729
BP	GO:0006700	C21-steroid hormone biosynthetic process	2/108	20/18903	0.0057457719284208	0.0144544969982575	0.0066231648807729	EGR1/ADM	2	1
BP	GO:0032332	positive regulation of chondrocyte differentiation	2/108	20/18903	0.0057457719284208	0.0144544969982575	0.0066231648807729	ACVRL1/LOXL2	2	1
BP	GO:0043586	tongue development	2/108	20/18903	0.0057457719284208	0.0144544969982575	0.0066231648807729	CYP26B1/SIX1	2	1
BP	GO:0048670	regulation of collateral sprouting	2/108	20/18903	0.0057457719284208	0.0144544969982575	0.0066231648807729	SEMA4D/NGF	2	1
BP	GO:0051546	keratinocyte migration	2/108	20/18903	0.0057457719284208	0.0144544969982575	0.0066231648807729	MMP9/ARF6	2	1
BP	GO:2000010	positive regulation of protein localization to cell surface	2/108	20/18903	0.0057457719284208	0.0144544969982575	0.0066231648807729	AKT1/TNF	2	1
BP	GO:2001014	regulation of skeletal muscle cell differentiation	2/108	20/18903	0.0057457719284208	0.0144544969982575	0.0066231648807729	CYP26B1/SIX1	2	1
BP	GO:0002460	adaptive immune response based on somatic recombination of immune receptors built from immunoglobulin superfamily domains	7/108	375/18903	0.00575221841368029	0.0144544969982575	0.0066231648807729	FOXP3/IL6/PPP3CB/TGFB1/CCL19/IL1B/TNF	7	0.186666666666667
BP	GO:0051283	negative regulation of sequestering of calcium ion	4/108	125/18903	0.0057534075284803	0.0144544969982575	0.0066231648807729	FGF2/CCL21/CCR7/CCL19	4	0.32
BP	GO:0006874	cellular calcium ion homeostasis	6/108	284/18903	0.00581653467007811	0.0146024967569329	0.0066909795410921	CXCL12/FGF2/CCL21/CCR7/CCL5/CCL19	6	0.211267605633803
BP	GO:0002712	regulation of B cell mediated immunity	3/108	64/18903	0.00586874098525837	0.0147015783581509	0.00673637951465029	FOXP3/TGFB1/TNF	3	0.46875
BP	GO:0002889	regulation of immunoglobulin mediated immune response	3/108	64/18903	0.00586874098525837	0.0147015783581509	0.00673637951465029	FOXP3/TGFB1/TNF	3	0.46875
BP	GO:0019229	regulation of vasoconstriction	3/108	64/18903	0.00586874098525837	0.0147015783581509	0.00673637951465029	LEP/ADM/PTGS2	3	0.46875
BP	GO:0032271	regulation of protein polymerization	5/108	201/18903	0.00595715405449643	0.0149122685008436	0.00683291940489867	MET/GRB2/CCL21/CCR7/ARF6	5	0.248756218905473
BP	GO:0001838	embryonic epithelial tube formation	4/108	127/18903	0.0060823830049727	0.0152037617062928	0.00696648389777227	TGFB1/ADM/TWIST1/SIX1	4	0.31496062992126
BP	GO:0051282	regulation of sequestering of calcium ion	4/108	127/18903	0.0060823830049727	0.0152037617062928	0.00696648389777227	FGF2/CCL21/CCR7/CCL19	4	0.31496062992126
BP	GO:0015800	acidic amino acid transport	3/108	65/18903	0.00612746096879602	0.0152394180129108	0.00698282189955808	NTRK2/ITGB1/TNF	3	0.461538461538462
BP	GO:0032613	interleukin-10 production	3/108	65/18903	0.00612746096879602	0.0152394180129108	0.00698282189955808	FOXP3/IL6/HGF	3	0.461538461538462
BP	GO:0032653	regulation of interleukin-10 production	3/108	65/18903	0.00612746096879602	0.0152394180129108	0.00698282189955808	FOXP3/IL6/HGF	3	0.461538461538462
BP	GO:0035065	regulation of histone acetylation	3/108	65/18903	0.00612746096879602	0.0152394180129108	0.00698282189955808	FOXP3/TWIST1/GATA2	3	0.461538461538462
BP	GO:0040014	regulation of multicellular organism growth	3/108	65/18903	0.00612746096879602	0.0152394180129108	0.00698282189955808	GHR/IGF1/PIK3CA	3	0.461538461538462
BP	GO:0048247	lymphocyte chemotaxis	3/108	65/18903	0.00612746096879602	0.0152394180129108	0.00698282189955808	CCL21/CCL5/CCL19	3	0.461538461538462
BP	GO:0050435	amyloid-beta metabolic process	3/108	65/18903	0.00612746096879602	0.0152394180129108	0.00698282189955808	IGF1/NTRK2/TNF	3	0.461538461538462
BP	GO:0007548	sex differentiation	6/108	288/18903	0.00621621333894397	0.0154490528208356	0.00707887822706658	LEP/ADAMTS1/KDR/VEGFA/RETN/NKX3-1	6	0.208333333333333
BP	GO:0030218	erythrocyte differentiation	4/108	128/18903	0.00625147043463739	0.0155144018958528	0.00710882169024602	EPAS1/PLA2G10/VEGFA/GATA2	4	0.3125
BP	GO:0046683	response to organophosphorus	4/108	128/18903	0.00625147043463739	0.0155144018958528	0.00710882169024602	COL1A1/LPAR1/PTGS2/IL1B	4	0.3125
BP	GO:0002089	lens morphogenesis in camera-type eye	2/108	21/18903	0.00632703170758761	0.0155459075739307	0.00712325784119721	PROX1/EPHA2	2	0.952380952380952
BP	GO:0007252	I-kappaB phosphorylation	2/108	21/18903	0.00632703170758761	0.0155459075739307	0.00712325784119721	AKT1/TNF	2	0.952380952380952
BP	GO:0032305	positive regulation of icosanoid secretion	2/108	21/18903	0.00632703170758761	0.0155459075739307	0.00712325784119721	PLA2G10/IL1B	2	0.952380952380952
BP	GO:0038083	peptidyl-tyrosine autophosphorylation	2/108	21/18903	0.00632703170758761	0.0155459075739307	0.00712325784119721	KDR/VEGFA	2	0.952380952380952
BP	GO:0043373	CD4-positive, alpha-beta T cell lineage commitment	2/108	21/18903	0.00632703170758761	0.0155459075739307	0.00712325784119721	FOXP3/IL6	2	0.952380952380952
BP	GO:0071605	monocyte chemotactic protein-1 production	2/108	21/18903	0.00632703170758761	0.0155459075739307	0.00712325784119721	TWIST1/IL1B	2	0.952380952380952
BP	GO:0071636	positive regulation of transforming growth factor beta production	2/108	21/18903	0.00632703170758761	0.0155459075739307	0.00712325784119721	FOXP3/PTGS2	2	0.952380952380952
BP	GO:0071637	regulation of monocyte chemotactic protein-1 production	2/108	21/18903	0.00632703170758761	0.0155459075739307	0.00712325784119721	TWIST1/IL1B	2	0.952380952380952
BP	GO:0071731	response to nitric oxide	2/108	21/18903	0.00632703170758761	0.0155459075739307	0.00712325784119721	CCR7/CCL19	2	0.952380952380952
BP	GO:0090189	regulation of branching involved in ureteric bud morphogenesis	2/108	21/18903	0.00632703170758761	0.0155459075739307	0.00712325784119721	VEGFA/SIX1	2	0.952380952380952
BP	GO:0140131	positive regulation of lymphocyte chemotaxis	2/108	21/18903	0.00632703170758761	0.0155459075739307	0.00712325784119721	CCL21/CCL5	2	0.952380952380952
BP	GO:1901522	positive regulation of transcription from RNA polymerase II promoter involved in cellular response to chemical stimulus	2/108	21/18903	0.00632703170758761	0.0155459075739307	0.00712325784119721	JUN/VEGFA	2	0.952380952380952
BP	GO:1903206	negative regulation of hydrogen peroxide-induced cell death	2/108	21/18903	0.00632703170758761	0.0155459075739307	0.00712325784119721	MET/HGF	2	0.952380952380952
BP	GO:2000757	negative regulation of peptidyl-lysine acetylation	2/108	21/18903	0.00632703170758761	0.0155459075739307	0.00712325784119721	FOXP3/TWIST1	2	0.952380952380952
BP	GO:0033692	cellular polysaccharide biosynthetic process	3/108	66/18903	0.00639290644151892	0.0156743924224777	0.00718213061530416	IGF1/AKT1/IRS1	3	0.454545454545455
BP	GO:0060389	pathway-restricted SMAD protein phosphorylation	3/108	66/18903	0.00639290644151892	0.0156743924224777	0.00718213061530416	ACVRL1/TGFB1/EMILIN1	3	0.454545454545455
BP	GO:0060675	ureteric bud morphogenesis	3/108	66/18903	0.00639290644151892	0.0156743924224777	0.00718213061530416	FGF2/VEGFA/SIX1	3	0.454545454545455
BP	GO:2000241	regulation of reproductive process	5/108	206/18903	0.00659536241093165	0.0161567338926324	0.0074031432929542	IGF1/PLA2G10/VEGFA/RETN/NKX3-1	5	0.242718446601942
BP	GO:0042542	response to hydrogen peroxide	4/108	130/18903	0.00659896641368638	0.0161567338926324	0.0074031432929542	COL1A1/IL6/MET/HGF	4	0.307692307692308
BP	GO:0015909	long-chain fatty acid transport	3/108	67/18903	0.00666512121768499	0.016272672535702	0.00745626729645259	PLA2G10/AKT1/PLA2G2A	3	0.447761194029851
BP	GO:0070613	regulation of protein processing	3/108	67/18903	0.00666512121768499	0.016272672535702	0.00745626729645259	CCBE1/SERPINE1/SERPINE2	3	0.447761194029851
BP	GO:0072171	mesonephric tubule morphogenesis	3/108	67/18903	0.00666512121768499	0.016272672535702	0.00745626729645259	FGF2/VEGFA/SIX1	3	0.447761194029851
BP	GO:1901224	positive regulation of NIK/NF-kappaB signaling	3/108	67/18903	0.00666512121768499	0.016272672535702	0.00745626729645259	CCL19/IL1B/TNF	3	0.447761194029851
BP	GO:0051208	sequestering of calcium ion	4/108	131/18903	0.00677742300314894	0.0165351926969004	0.00757655611123138	FGF2/CCL21/CCR7/CCL19	4	0.305343511450382
BP	GO:0021533	cell differentiation in hindbrain	2/108	22/18903	0.00693392823837449	0.0167413922958281	0.00767103839879987	PROX1/GATA2	2	0.909090909090909
BP	GO:0031290	retinal ganglion cell axon guidance	2/108	22/18903	0.00693392823837449	0.0167413922958281	0.00767103839879987	NRP1/VEGFA	2	0.909090909090909
BP	GO:0032303	regulation of icosanoid secretion	2/108	22/18903	0.00693392823837449	0.0167413922958281	0.00767103839879987	PLA2G10/IL1B	2	0.909090909090909
BP	GO:0033630	positive regulation of cell adhesion mediated by integrin	2/108	22/18903	0.00693392823837449	0.0167413922958281	0.00767103839879987	CCL21/CCL5	2	0.909090909090909
BP	GO:0035313	wound healing, spreading of epidermal cells	2/108	22/18903	0.00693392823837449	0.0167413922958281	0.00767103839879987	ACVRL1/ITGB1	2	0.909090909090909
BP	GO:0046628	positive regulation of insulin receptor signaling pathway	2/108	22/18903	0.00693392823837449	0.0167413922958281	0.00767103839879987	LEP/IRS1	2	0.909090909090909
BP	GO:0048634	regulation of muscle organ development	2/108	22/18903	0.00693392823837449	0.0167413922958281	0.00767103839879987	TGFB1/TWIST1	2	0.909090909090909
BP	GO:0051000	positive regulation of nitric-oxide synthase activity	2/108	22/18903	0.00693392823837449	0.0167413922958281	0.00767103839879987	AKT1/TNF	2	0.909090909090909
BP	GO:0060713	labyrinthine layer morphogenesis	2/108	22/18903	0.00693392823837449	0.0167413922958281	0.00767103839879987	GRB2/ADM	2	0.909090909090909
BP	GO:0071404	cellular response to low-density lipoprotein particle stimulus	2/108	22/18903	0.00693392823837449	0.0167413922958281	0.00767103839879987	CD9/ITGB1	2	0.909090909090909
BP	GO:1903589	positive regulation of blood vessel endothelial cell proliferation involved in sprouting angiogenesis	2/108	22/18903	0.00693392823837449	0.0167413922958281	0.00767103839879987	VEGFA/GATA2	2	0.909090909090909
BP	GO:2000810	regulation of bicellular tight junction assembly	2/108	22/18903	0.00693392823837449	0.0167413922958281	0.00767103839879987	EPHA2/TNF	2	0.909090909090909
BP	GO:2000831	regulation of steroid hormone secretion	2/108	22/18903	0.00693392823837449	0.0167413922958281	0.00767103839879987	RETN/NKX3-1	2	0.909090909090909
BP	GO:0038034	signal transduction in absence of ligand	3/108	68/18903	0.00694414769982932	0.0167413922958281	0.00767103839879987	AKT1/IL1B/TNF	3	0.441176470588235
BP	GO:0042093	T-helper cell differentiation	3/108	68/18903	0.00694414769982932	0.0167413922958281	0.00767103839879987	FOXP3/IL6/CCL19	3	0.441176470588235
BP	GO:0042987	amyloid precursor protein catabolic process	3/108	68/18903	0.00694414769982932	0.0167413922958281	0.00767103839879987	IGF1/NTRK2/TNF	3	0.441176470588235
BP	GO:0097192	extrinsic apoptotic signaling pathway in absence of ligand	3/108	68/18903	0.00694414769982932	0.0167413922958281	0.00767103839879987	AKT1/IL1B/TNF	3	0.441176470588235
BP	GO:0050807	regulation of synapse organization	5/108	209/18903	0.00700052921917665	0.0168655756136323	0.00772794017748908	NTRK2/ARF6/SEMA4D/SIX1/TNF	5	0.239234449760766
BP	GO:0007178	transmembrane receptor protein serine/threonine kinase signaling pathway	7/108	390/18903	0.00707907402690824	0.0170429445626956	0.00780921203319722	EGR1/ACVRL1/KDR/JUN/COL1A2/TGFB1/EMILIN1	7	0.179487179487179
BP	GO:0007623	circadian rhythm	5/108	210/18903	0.00713937253412779	0.0171631396575659	0.00786428637658541	LEP/EGR1/NTRK2/PROX1/TNF	5	0.238095238095238
BP	GO:0002702	positive regulation of production of molecular mediator of immune response	4/108	133/18903	0.00714387182165003	0.0171631396575659	0.00786428637658541	IL6/SEMA7A/TGFB1/IL1B	4	0.300751879699248
BP	GO:0035303	regulation of dephosphorylation	4/108	133/18903	0.00714387182165003	0.0171631396575659	0.00786428637658541	ITGA1/TGFB1/SEMA4D/TNF	4	0.300751879699248
BP	GO:0034394	protein localization to cell surface	3/108	69/18903	0.00723002689693842	0.0173220436797238	0.00793709745670093	ARF6/AKT1/TNF	3	0.434782608695652
BP	GO:0050922	negative regulation of chemotaxis	3/108	69/18903	0.00723002689693842	0.0173220436797238	0.00793709745670093	NRP1/SEMA7A/SEMA4D	3	0.434782608695652
BP	GO:0055021	regulation of cardiac muscle tissue growth	3/108	69/18903	0.00723002689693842	0.0173220436797238	0.00793709745670093	IGF1/FGF2/MAPK11	3	0.434782608695652
BP	GO:0061180	mammary gland epithelium development	3/108	69/18903	0.00723002689693842	0.0173220436797238	0.00793709745670093	FGF2/EPHA2/AKT1	3	0.434782608695652
BP	GO:0016051	carbohydrate biosynthetic process	5/108	212/18903	0.00742282071328892	0.0177716495915673	0.0081431104425467	LEP/IGF1/TGFB1/AKT1/IRS1	5	0.235849056603774
BP	GO:0002294	CD4-positive, alpha-beta T cell differentiation involved in immune response	3/108	70/18903	0.00752279844244701	0.0179688059355754	0.0082334490391657	FOXP3/IL6/CCL19	3	0.428571428571429
BP	GO:0002053	positive regulation of mesenchymal cell proliferation	2/108	23/18903	0.00756615517359411	0.0179688059355754	0.0082334490391657	KDR/SIX1	2	0.869565217391304
BP	GO:0002363	alpha-beta T cell lineage commitment	2/108	23/18903	0.00756615517359411	0.0179688059355754	0.0082334490391657	FOXP3/IL6	2	0.869565217391304
BP	GO:0010893	positive regulation of steroid biosynthetic process	2/108	23/18903	0.00756615517359411	0.0179688059355754	0.0082334490391657	ADM/TNF	2	0.869565217391304
BP	GO:0035024	negative regulation of Rho protein signal transduction	2/108	23/18903	0.00756615517359411	0.0179688059355754	0.0082334490391657	MET/ITGB1	2	0.869565217391304
BP	GO:0045723	positive regulation of fatty acid biosynthetic process	2/108	23/18903	0.00756615517359411	0.0179688059355754	0.0082334490391657	PTGS2/IL1B	2	0.869565217391304
BP	GO:0072677	eosinophil migration	2/108	23/18903	0.00756615517359411	0.0179688059355754	0.0082334490391657	CCL21/CCL5	2	0.869565217391304
BP	GO:0150146	cell junction disassembly	2/108	23/18903	0.00756615517359411	0.0179688059355754	0.0082334490391657	PIK3R1/ARF6	2	0.869565217391304
BP	GO:1900120	regulation of receptor binding	2/108	23/18903	0.00756615517359411	0.0179688059355754	0.0082334490391657	NRP1/MMP9	2	0.869565217391304
BP	GO:1901032	negative regulation of response to reactive oxygen species	2/108	23/18903	0.00756615517359411	0.0179688059355754	0.0082334490391657	MET/HGF	2	0.869565217391304
BP	GO:2000178	negative regulation of neural precursor cell proliferation	2/108	23/18903	0.00756615517359411	0.0179688059355754	0.0082334490391657	PROX1/GATA2	2	0.869565217391304
BP	GO:1902806	regulation of cell cycle G1/S phase transition	5/108	213/18903	0.00756745206645548	0.0179688059355754	0.0082334490391657	ADAMTS1/SMARCA4/CDKN2A/AKT1/NKX3-1	5	0.234741784037559
BP	GO:0007498	mesoderm development	4/108	136/18903	0.00771773272461038	0.0183130847790275	0.00839120032898369	TIE1/EPHA2/ITGB1/VEGFA	4	0.294117647058824
BP	GO:0002287	alpha-beta T cell activation involved in immune response	3/108	71/18903	0.0078225006120585	0.0184982903817941	0.00847606300141801	FOXP3/IL6/CCL19	3	0.422535211267606
BP	GO:0002293	alpha-beta T cell differentiation involved in immune response	3/108	71/18903	0.0078225006120585	0.0184982903817941	0.00847606300141801	FOXP3/IL6/CCL19	3	0.422535211267606
BP	GO:0032715	negative regulation of interleukin-6 production	3/108	71/18903	0.0078225006120585	0.0184982903817941	0.00847606300141801	FOXP3/HGF/TNF	3	0.422535211267606
BP	GO:2000036	regulation of stem cell population maintenance	3/108	71/18903	0.0078225006120585	0.0184982903817941	0.00847606300141801	ELAVL1/SMARCA4/LOXL2	3	0.422535211267606
BP	GO:2000379	positive regulation of reactive oxygen species metabolic process	3/108	71/18903	0.0078225006120585	0.0184982903817941	0.00847606300141801	LEP/GRB2/TGFB1	3	0.422535211267606
BP	GO:0030003	cellular cation homeostasis	8/108	499/18903	0.007855150542785	0.0185628199174892	0.00850563094519633	SCARA5/CXCL12/FGF2/CCL21/CCR7/CCL5/CCL19/LCN2	8	0.160320641282565
BP	GO:0050803	regulation of synapse structure or activity	5/108	215/18903	0.00786259514105839	0.018567738320835	0.00850788459652114	NTRK2/ARF6/SEMA4D/SIX1/TNF	5	0.232558139534884
BP	GO:0009581	detection of external stimulus	4/108	137/18903	0.0079155610971017	0.0186673518516118	0.00855352830441149	CXCL12/CXCR4/SERPINE2/TNF	4	0.291970802919708
BP	GO:0034101	erythrocyte homeostasis	4/108	137/18903	0.0079155610971017	0.0186673518516118	0.00855352830441149	EPAS1/PLA2G10/VEGFA/GATA2	4	0.291970802919708
BP	GO:0007179	transforming growth factor beta receptor signaling pathway	5/108	216/18903	0.00801313304210923	0.0188845926424657	0.00865306975347255	ACVRL1/JUN/COL1A2/TGFB1/EMILIN1	5	0.231481481481481
BP	GO:0006631	fatty acid metabolic process	7/108	400/18903	0.00808212555477333	0.0190342303881805	0.00872163495241204	LEP/PLA2G10/AKT1/TWIST1/PTGS2/IRS1/IL1B	7	0.175
BP	GO:0030879	mammary gland development	4/108	138/18903	0.00811669756531684	0.0190801272690815	0.00874266526635222	FGF2/EPHA2/AKT1/VEGFA	4	0.289855072463768
BP	GO:0035914	skeletal muscle cell differentiation	3/108	72/18903	0.00812917034139088	0.0190801272690815	0.00874266526635222	EGR1/CYP26B1/SIX1	3	0.416666666666667
BP	GO:0045600	positive regulation of fat cell differentiation	3/108	72/18903	0.00812917034139088	0.0190801272690815	0.00874266526635222	AKT1/PTGS2/SIX1	3	0.416666666666667
BP	GO:1900076	regulation of cellular response to insulin stimulus	3/108	72/18903	0.00812917034139088	0.0190801272690815	0.00874266526635222	LEP/IRS1/IL1B	3	0.416666666666667
BP	GO:1903317	regulation of protein maturation	3/108	72/18903	0.00812917034139088	0.0190801272690815	0.00874266526635222	CCBE1/SERPINE1/SERPINE2	3	0.416666666666667
BP	GO:0001759	organ induction	2/108	24/18903	0.0082234087730782	0.019132688959944	0.00876674944894514	FGF2/SIX1	2	0.833333333333333
BP	GO:0006925	inflammatory cell apoptotic process	2/108	24/18903	0.0082234087730782	0.019132688959944	0.00876674944894514	CDKN2A/IL6	2	0.833333333333333
BP	GO:0010226	response to lithium ion	2/108	24/18903	0.0082234087730782	0.019132688959944	0.00876674944894514	PTGS2/CDH1	2	0.833333333333333
BP	GO:0010623	programmed cell death involved in cell development	2/108	24/18903	0.0082234087730782	0.019132688959944	0.00876674944894514	FGF2/IL1B	2	0.833333333333333
BP	GO:0016048	detection of temperature stimulus	2/108	24/18903	0.0082234087730782	0.019132688959944	0.00876674944894514	CXCL12/CXCR4	2	0.833333333333333
BP	GO:0035357	peroxisome proliferator activated receptor signaling pathway	2/108	24/18903	0.0082234087730782	0.019132688959944	0.00876674944894514	LEP/TWIST1	2	0.833333333333333
BP	GO:0036010	protein localization to endosome	2/108	24/18903	0.0082234087730782	0.019132688959944	0.00876674944894514	NRP1/ARF6	2	0.833333333333333
BP	GO:0040037	negative regulation of fibroblast growth factor receptor signaling pathway	2/108	24/18903	0.0082234087730782	0.019132688959944	0.00876674944894514	FGF2/SULF2	2	0.833333333333333
BP	GO:0043369	CD4-positive or CD8-positive, alpha-beta T cell lineage commitment	2/108	24/18903	0.0082234087730782	0.019132688959944	0.00876674944894514	FOXP3/IL6	2	0.833333333333333
BP	GO:0051043	regulation of membrane protein ectodomain proteolysis	2/108	24/18903	0.0082234087730782	0.019132688959944	0.00876674944894514	IL1B/TNF	2	0.833333333333333
BP	GO:0120255	olefinic compound biosynthetic process	2/108	24/18903	0.0082234087730782	0.019132688959944	0.00876674944894514	EGR1/ADM	2	0.833333333333333
BP	GO:1903792	negative regulation of anion transport	2/108	24/18903	0.0082234087730782	0.019132688959944	0.00876674944894514	LEP/TNF	2	0.833333333333333
BP	GO:2000637	positive regulation of miRNA-mediated gene silencing	2/108	24/18903	0.0082234087730782	0.019132688959944	0.00876674944894514	IL6/TGFB1	2	0.833333333333333
BP	GO:0042246	tissue regeneration	3/108	73/18903	0.00844284324344936	0.019603704432476	0.00898257246487923	IGF1/CD9/IGFBP1	3	0.410958904109589
BP	GO:0060415	muscle tissue morphogenesis	3/108	73/18903	0.00844284324344936	0.019603704432476	0.00898257246487923	S1PR1/PROX1/TGFB1	3	0.410958904109589
BP	GO:0061035	regulation of cartilage development	3/108	73/18903	0.00844284324344936	0.019603704432476	0.00898257246487923	LEP/ACVRL1/LOXL2	3	0.410958904109589
BP	GO:0009582	detection of abiotic stimulus	4/108	140/18903	0.00852898289895112	0.0197507282917517	0.00904993996037271	CXCL12/CXCR4/SERPINE2/TNF	4	0.285714285714286
BP	GO:0030833	regulation of actin filament polymerization	4/108	140/18903	0.00852898289895112	0.0197507282917517	0.00904993996037271	GRB2/CCL21/CCR7/ARF6	4	0.285714285714286
BP	GO:0034341	response to interferon-gamma	4/108	140/18903	0.00852898289895112	0.0197507282917517	0.00904993996037271	CCL21/CCL5/CCL19/TNF	4	0.285714285714286
BP	GO:0071326	cellular response to monosaccharide stimulus	4/108	140/18903	0.00852898289895112	0.0197507282917517	0.00904993996037271	LEP/SMARCA4/PPP3CB/PIK3CA	4	0.285714285714286
BP	GO:0045786	negative regulation of cell cycle	7/108	405/18903	0.00862135252530856	0.0199512850552261	0.00914183665609344	CDKN2A/PROX1/TGFB1/HOXD10/PTGS2/NKX3-1/TNF	7	0.172839506172839
BP	GO:0042058	regulation of epidermal growth factor receptor signaling pathway	3/108	74/18903	0.00876355362592734	0.0202128065642641	0.00926166788055156	ITGA1/MMP9/SOS1	3	0.405405405405405
BP	GO:0050766	positive regulation of phagocytosis	3/108	74/18903	0.00876355362592734	0.0202128065642641	0.00926166788055156	IL1B/GATA2/TNF	3	0.405405405405405
BP	GO:0051145	smooth muscle cell differentiation	3/108	74/18903	0.00876355362592734	0.0202128065642641	0.00926166788055156	ADM/VEGFA/SIX1	3	0.405405405405405
BP	GO:2000573	positive regulation of DNA biosynthetic process	3/108	74/18903	0.00876355362592734	0.0202128065642641	0.00926166788055156	FGF2/HGF/TNF	3	0.405405405405405
BP	GO:2000756	regulation of peptidyl-lysine acetylation	3/108	74/18903	0.00876355362592734	0.0202128065642641	0.00926166788055156	FOXP3/TWIST1/GATA2	3	0.405405405405405
BP	GO:0050866	negative regulation of cell activation	5/108	221/18903	0.00879600487368007	0.0202741470523838	0.00928977457750079	FOXP3/CD9/ERBB2/SERPINE2/EMILIN1	5	0.226244343891403
BP	GO:0019835	cytolysis	2/108	25/18903	0.00890538788433996	0.020336710326903	0.00931844156485233	TGFB1/PLA2G2A	2	0.8
BP	GO:0034114	regulation of heterotypic cell-cell adhesion	2/108	25/18903	0.00890538788433996	0.020336710326903	0.00931844156485233	IL1B/TNF	2	0.8
BP	GO:0045649	regulation of macrophage differentiation	2/108	25/18903	0.00890538788433996	0.020336710326903	0.00931844156485233	TGFB1/GATA2	2	0.8
BP	GO:0045662	negative regulation of myoblast differentiation	2/108	25/18903	0.00890538788433996	0.020336710326903	0.00931844156485233	TGFB1/TNF	2	0.8
BP	GO:0046885	regulation of hormone biosynthetic process	2/108	25/18903	0.00890538788433996	0.020336710326903	0.00931844156485233	EGR1/ADM	2	0.8
BP	GO:0048668	collateral sprouting	2/108	25/18903	0.00890538788433996	0.020336710326903	0.00931844156485233	SEMA4D/NGF	2	0.8
BP	GO:0048745	smooth muscle tissue development	2/108	25/18903	0.00890538788433996	0.020336710326903	0.00931844156485233	PROX1/SIX1	2	0.8
BP	GO:0060148	positive regulation of post-transcriptional gene silencing	2/108	25/18903	0.00890538788433996	0.020336710326903	0.00931844156485233	IL6/TGFB1	2	0.8
BP	GO:0060396	growth hormone receptor signaling pathway	2/108	25/18903	0.00890538788433996	0.020336710326903	0.00931844156485233	GHR/PIK3R1	2	0.8
BP	GO:0071378	cellular response to growth hormone stimulus	2/108	25/18903	0.00890538788433996	0.020336710326903	0.00931844156485233	GHR/PIK3R1	2	0.8
BP	GO:1900078	positive regulation of cellular response to insulin stimulus	2/108	25/18903	0.00890538788433996	0.020336710326903	0.00931844156485233	LEP/IRS1	2	0.8
BP	GO:1900370	positive regulation of post-transcriptional gene silencing by RNA	2/108	25/18903	0.00890538788433996	0.020336710326903	0.00931844156485233	IL6/TGFB1	2	0.8
BP	GO:1901984	negative regulation of protein acetylation	2/108	25/18903	0.00890538788433996	0.020336710326903	0.00931844156485233	FOXP3/TWIST1	2	0.8
BP	GO:2000193	positive regulation of fatty acid transport	2/108	25/18903	0.00890538788433996	0.020336710326903	0.00931844156485233	PLA2G10/IL1B	2	0.8
BP	GO:0035107	appendage morphogenesis	4/108	142/18903	0.00895476258517482	0.0204090770703589	0.00935160057923042	CYP26B1/TWIST1/HOXD10/RSPO2	4	0.28169014084507
BP	GO:0035108	limb morphogenesis	4/108	142/18903	0.00895476258517482	0.0204090770703589	0.00935160057923042	CYP26B1/TWIST1/HOXD10/RSPO2	4	0.28169014084507
BP	GO:0038061	NIK/NF-kappaB signaling	4/108	142/18903	0.00895476258517482	0.0204090770703589	0.00935160057923042	AKT1/CCL19/IL1B/TNF	4	0.28169014084507
BP	GO:0005977	glycogen metabolic process	3/108	75/18903	0.00909133450833709	0.0206795007016183	0.00947551082651912	IGF1/AKT1/IRS1	3	0.4
BP	GO:0045661	regulation of myoblast differentiation	3/108	75/18903	0.00909133450833709	0.0206795007016183	0.00947551082651912	SMARCA4/TGFB1/TNF	3	0.4
BP	GO:0072078	nephron tubule morphogenesis	3/108	75/18903	0.00909133450833709	0.0206795007016183	0.00947551082651912	FGF2/VEGFA/SIX1	3	0.4
BP	GO:0050890	cognition	6/108	314/18903	0.00931800259740508	0.0211811720237796	0.00970538059528593	NTRK2/PPP3CB/ITGB1/PTGS2/NGF/TNF	6	0.191082802547771
BP	GO:0001937	negative regulation of endothelial cell proliferation	3/108	76/18903	0.00942621763897159	0.0213710317394366	0.00979237581906745	ACVRL1/FLT1/TNF	3	0.394736842105263
BP	GO:0006073	cellular glucan metabolic process	3/108	76/18903	0.00942621763897159	0.0213710317394366	0.00979237581906745	IGF1/AKT1/IRS1	3	0.394736842105263
BP	GO:0019226	transmission of nerve impulse	3/108	76/18903	0.00942621763897159	0.0213710317394366	0.00979237581906745	S1PR1/TYMP/NTRK2	3	0.394736842105263
BP	GO:0044042	glucan metabolic process	3/108	76/18903	0.00942621763897159	0.0213710317394366	0.00979237581906745	IGF1/AKT1/IRS1	3	0.394736842105263
BP	GO:0002726	positive regulation of T cell cytokine production	2/108	26/18903	0.0096117939233694	0.0216923276158441	0.00993959613155677	IL6/IL1B	2	0.769230769230769
BP	GO:0033622	integrin activation	2/108	26/18903	0.0096117939233694	0.0216923276158441	0.00993959613155677	FN1/CXCL12	2	0.769230769230769
BP	GO:0035994	response to muscle stretch	2/108	26/18903	0.0096117939233694	0.0216923276158441	0.00993959613155677	JUN/PIK3CA	2	0.769230769230769
BP	GO:0045026	plasma membrane fusion	2/108	26/18903	0.0096117939233694	0.0216923276158441	0.00993959613155677	TIE1/CD9	2	0.769230769230769
BP	GO:0048596	embryonic camera-type eye morphogenesis	2/108	26/18903	0.0096117939233694	0.0216923276158441	0.00993959613155677	PROX1/TWIST1	2	0.769230769230769
BP	GO:0050951	sensory perception of temperature stimulus	2/108	26/18903	0.0096117939233694	0.0216923276158441	0.00993959613155677	CXCL12/CXCR4	2	0.769230769230769
BP	GO:0060669	embryonic placenta morphogenesis	2/108	26/18903	0.0096117939233694	0.0216923276158441	0.00993959613155677	GRB2/ADM	2	0.769230769230769
BP	GO:0032720	negative regulation of tumor necrosis factor production	3/108	77/18903	0.00976823351169908	0.022016682563478	0.0100882181346837	FOXP3/IGF1/TWIST1	3	0.38961038961039
BP	GO:0072088	nephron epithelium morphogenesis	3/108	77/18903	0.00976823351169908	0.022016682563478	0.0100882181346837	FGF2/VEGFA/SIX1	3	0.38961038961039
BP	GO:0072073	kidney epithelium development	4/108	146/18903	0.00984748137813029	0.0221808591614099	0.0101634451507327	FGF2/CD24/VEGFA/SIX1	4	0.273972602739726
BP	GO:0006865	amino acid transport	4/108	147/18903	0.0100793560852646	0.0226883815131248	0.0103959959075311	LEP/NTRK2/ITGB1/TNF	4	0.272108843537415
BP	GO:0045913	positive regulation of carbohydrate metabolic process	3/108	78/18903	0.0101174113825915	0.0227444663678777	0.010421694431692	IGF1/AKT1/IRS1	3	0.384615384615385
BP	GO:0051966	regulation of synaptic transmission, glutamatergic	3/108	78/18903	0.0101174113825915	0.0227444663678777	0.010421694431692	SERPINE2/PTGS2/TNF	3	0.384615384615385
BP	GO:0071241	cellular response to inorganic substance	5/108	229/18903	0.0101563224987346	0.0228171242638671	0.0104549868544643	MMP9/JUN/AKT1/PTGS2/CDH1	5	0.218340611353712
BP	GO:0002710	negative regulation of T cell mediated immunity	2/108	27/18903	0.0103423308555602	0.0230406366936612	0.0105574020181056	FOXP3/PPP3CB	2	0.740740740740741
BP	GO:0031639	plasminogen activation	2/108	27/18903	0.0103423308555602	0.0230406366936612	0.0105574020181056	SERPINE1/SERPINE2	2	0.740740740740741
BP	GO:0031954	positive regulation of protein autophosphorylation	2/108	27/18903	0.0103423308555602	0.0230406366936612	0.0105574020181056	VEGFC/VEGFA	2	0.740740740740741
BP	GO:0032682	negative regulation of chemokine production	2/108	27/18903	0.0103423308555602	0.0230406366936612	0.0105574020181056	IL6/EPHA2	2	0.740740740740741
BP	GO:0032740	positive regulation of interleukin-17 production	2/108	27/18903	0.0103423308555602	0.0230406366936612	0.0105574020181056	IL6/TGFB1	2	0.740740740740741
BP	GO:0033081	regulation of T cell differentiation in thymus	2/108	27/18903	0.0103423308555602	0.0230406366936612	0.0105574020181056	SOS1/ERBB2	2	0.740740740740741
BP	GO:0035929	steroid hormone secretion	2/108	27/18903	0.0103423308555602	0.0230406366936612	0.0105574020181056	RETN/NKX3-1	2	0.740740740740741
BP	GO:0048641	regulation of skeletal muscle tissue development	2/108	27/18903	0.0103423308555602	0.0230406366936612	0.0105574020181056	TGFB1/TWIST1	2	0.740740740740741
BP	GO:0051953	negative regulation of amine transport	2/108	27/18903	0.0103423308555602	0.0230406366936612	0.0105574020181056	LEP/TNF	2	0.740740740740741
BP	GO:0061436	establishment of skin barrier	2/108	27/18903	0.0103423308555602	0.0230406366936612	0.0105574020181056	CYP26B1/MET	2	0.740740740740741
BP	GO:1900746	regulation of vascular endothelial growth factor signaling pathway	2/108	27/18903	0.0103423308555602	0.0230406366936612	0.0105574020181056	CCBE1/ADAMTS3	2	0.740740740740741
BP	GO:1901623	regulation of lymphocyte chemotaxis	2/108	27/18903	0.0103423308555602	0.0230406366936612	0.0105574020181056	CCL21/CCL5	2	0.740740740740741
BP	GO:1905564	positive regulation of vascular endothelial cell proliferation	2/108	27/18903	0.0103423308555602	0.0230406366936612	0.0105574020181056	FGF2/ITGA4	2	0.740740740740741
BP	GO:0002292	T cell differentiation involved in immune response	3/108	79/18903	0.0104737792863884	0.0232735711742469	0.0106641344399617	FOXP3/IL6/CCL19	3	0.379746835443038
BP	GO:0002720	positive regulation of cytokine production involved in immune response	3/108	79/18903	0.0104737792863884	0.0232735711742469	0.0106641344399617	IL6/SEMA7A/IL1B	3	0.379746835443038
BP	GO:0061333	renal tubule morphogenesis	3/108	79/18903	0.0104737792863884	0.0232735711742469	0.0106641344399617	FGF2/VEGFA/SIX1	3	0.379746835443038
BP	GO:1903556	negative regulation of tumor necrosis factor superfamily cytokine production	3/108	79/18903	0.0104737792863884	0.0232735711742469	0.0106641344399617	FOXP3/IGF1/TWIST1	3	0.379746835443038
BP	GO:0009411	response to UV	4/108	149/18903	0.0105536798276862	0.0234210510022112	0.0107317108639157	PIK3R1/MMP9/AKT1/PTGS2	4	0.268456375838926
BP	GO:2000377	regulation of reactive oxygen species metabolic process	4/108	149/18903	0.0105536798276862	0.0234210510022112	0.0107317108639157	LEP/GRB2/TGFB1/TNF	4	0.268456375838926
BP	GO:0008202	steroid metabolic process	6/108	323/18903	0.010612242109131	0.0235208592713263	0.0107774438024533	LEP/EGR1/CYP26B1/PROX1/ADM/TNF	6	0.185758513931889
BP	GO:0072503	cellular divalent inorganic cation homeostasis	6/108	323/18903	0.010612242109131	0.0235208592713263	0.0107774438024533	CXCL12/FGF2/CCL21/CCR7/CCL5/CCL19	6	0.185758513931889
BP	GO:0007612	learning	4/108	150/18903	0.0107961679706879	0.0239132012249018	0.0109572179895792	NTRK2/PPP3CB/ITGB1/PTGS2	4	0.266666666666667
BP	GO:0048644	muscle organ morphogenesis	3/108	80/18903	0.0108373640527979	0.0239584638255341	0.0109779576712822	S1PR1/PROX1/TGFB1	3	0.375
BP	GO:0072028	nephron morphogenesis	3/108	80/18903	0.0108373640527979	0.0239584638255341	0.0109779576712822	FGF2/VEGFA/SIX1	3	0.375
BP	GO:1901184	regulation of ERBB signaling pathway	3/108	80/18903	0.0108373640527979	0.0239584638255341	0.0109779576712822	ITGA1/MMP9/SOS1	3	0.375
BP	GO:0046718	viral entry into host cell	4/108	151/18903	0.011042232620961	0.0243606806100003	0.0111622565840465	NRP1/EPHA2/CXCR4/ITGB1	4	0.264900662251656
BP	GO:0010818	T cell chemotaxis	2/108	28/18903	0.0110967051767679	0.0243606806100003	0.0111622565840465	CCL21/CCL5	2	0.714285714285714
BP	GO:0014072	response to isoquinoline alkaloid	2/108	28/18903	0.0110967051767679	0.0243606806100003	0.0111622565840465	GHR/CXCR4	2	0.714285714285714
BP	GO:0035116	embryonic hindlimb morphogenesis	2/108	28/18903	0.0110967051767679	0.0243606806100003	0.0111622565840465	TWIST1/RSPO2	2	0.714285714285714
BP	GO:0042634	regulation of hair cycle	2/108	28/18903	0.0110967051767679	0.0243606806100003	0.0111622565840465	HPSE/TNF	2	0.714285714285714
BP	GO:0043278	response to morphine	2/108	28/18903	0.0110967051767679	0.0243606806100003	0.0111622565840465	GHR/CXCR4	2	0.714285714285714
BP	GO:0046337	phosphatidylethanolamine metabolic process	2/108	28/18903	0.0110967051767679	0.0243606806100003	0.0111622565840465	PLA2G10/PLA2G2A	2	0.714285714285714
BP	GO:1900017	positive regulation of cytokine production involved in inflammatory response	2/108	28/18903	0.0110967051767679	0.0243606806100003	0.0111622565840465	IL6/TNF	2	0.714285714285714
BP	GO:1902883	negative regulation of response to oxidative stress	2/108	28/18903	0.0110967051767679	0.0243606806100003	0.0111622565840465	MET/HGF	2	0.714285714285714
BP	GO:1903672	positive regulation of sprouting angiogenesis	2/108	28/18903	0.0110967051767679	0.0243606806100003	0.0111622565840465	FGF2/VEGFA	2	0.714285714285714
BP	GO:1903959	regulation of anion transmembrane transport	2/108	28/18903	0.0110967051767679	0.0243606806100003	0.0111622565840465	ITGB1/TNF	2	0.714285714285714
BP	GO:0007043	cell-cell junction assembly	4/108	152/18903	0.0112918927124764	0.0247421092218945	0.0113370301916735	CD9/EPHA2/IL1B/TNF	4	0.263157894736842
BP	GO:0030183	B cell differentiation	4/108	152/18903	0.0112918927124764	0.0247421092218945	0.0113370301916735	PIK3R1/IL6/ITGB1/ITGA4	4	0.263157894736842
BP	GO:0071322	cellular response to carbohydrate stimulus	4/108	152/18903	0.0112918927124764	0.0247421092218945	0.0113370301916735	LEP/SMARCA4/PPP3CB/PIK3CA	4	0.263157894736842
BP	GO:0022412	cellular process involved in reproduction in multicellular organism	7/108	430/18903	0.0117230991255556	0.0256706952388827	0.0117625156511284	IGF1/CYP26B1/CD9/SOS1/ITGB1/AKT1/RETN	7	0.162790697674419
BP	GO:0001958	endochondral ossification	2/108	29/18903	0.0118746258944974	0.0256937217792187	0.0117730665940839	COL1A1/FGFR3	2	0.689655172413793
BP	GO:0003094	glomerular filtration	2/108	29/18903	0.0118746258944974	0.0256937217792187	0.0117730665940839	MCAM/SULF2	2	0.689655172413793
BP	GO:0003156	regulation of animal organ formation	2/108	29/18903	0.0118746258944974	0.0256937217792187	0.0117730665940839	FGF2/SIX1	2	0.689655172413793
BP	GO:0003209	cardiac atrium morphogenesis	2/108	29/18903	0.0118746258944974	0.0256937217792187	0.0117730665940839	PROX1/SOS1	2	0.689655172413793
BP	GO:0010592	positive regulation of lamellipodium assembly	2/108	29/18903	0.0118746258944974	0.0256937217792187	0.0117730665940839	PIK3R1/PIK3CA	2	0.689655172413793
BP	GO:0010955	negative regulation of protein processing	2/108	29/18903	0.0118746258944974	0.0256937217792187	0.0117730665940839	SERPINE1/SERPINE2	2	0.689655172413793
BP	GO:0015813	L-glutamate transmembrane transport	2/108	29/18903	0.0118746258944974	0.0256937217792187	0.0117730665940839	ITGB1/TNF	2	0.689655172413793
BP	GO:0022011	myelination in peripheral nervous system	2/108	29/18903	0.0118746258944974	0.0256937217792187	0.0117730665940839	NTRK2/AKT1	2	0.689655172413793
BP	GO:0032292	peripheral nervous system axon ensheathment	2/108	29/18903	0.0118746258944974	0.0256937217792187	0.0117730665940839	NTRK2/AKT1	2	0.689655172413793
BP	GO:0036075	replacement ossification	2/108	29/18903	0.0118746258944974	0.0256937217792187	0.0117730665940839	COL1A1/FGFR3	2	0.689655172413793
BP	GO:0042104	positive regulation of activated T cell proliferation	2/108	29/18903	0.0118746258944974	0.0256937217792187	0.0117730665940839	IGF1/CD24	2	0.689655172413793
BP	GO:0051938	L-glutamate import	2/108	29/18903	0.0118746258944974	0.0256937217792187	0.0117730665940839	ITGB1/TNF	2	0.689655172413793
BP	GO:0060037	pharyngeal system development	2/108	29/18903	0.0118746258944974	0.0256937217792187	0.0117730665940839	SIX1/NKX3-1	2	0.689655172413793
BP	GO:0060441	epithelial tube branching involved in lung morphogenesis	2/108	29/18903	0.0118746258944974	0.0256937217792187	0.0117730665940839	RSPO2/TNF	2	0.689655172413793
BP	GO:0072012	glomerulus vasculature development	2/108	29/18903	0.0118746258944974	0.0256937217792187	0.0117730665940839	TEK/EGR1	2	0.689655172413793
BP	GO:0097421	liver regeneration	2/108	29/18903	0.0118746258944974	0.0256937217792187	0.0117730665940839	IL6/TNF	2	0.689655172413793
BP	GO:1902430	negative regulation of amyloid-beta formation	2/108	29/18903	0.0118746258944974	0.0256937217792187	0.0117730665940839	IGF1/NTRK2	2	0.689655172413793
BP	GO:1902547	regulation of cellular response to vascular endothelial growth factor stimulus	2/108	29/18903	0.0118746258944974	0.0256937217792187	0.0117730665940839	CCBE1/ADAMTS3	2	0.689655172413793
BP	GO:1903318	negative regulation of protein maturation	2/108	29/18903	0.0118746258944974	0.0256937217792187	0.0117730665940839	SERPINE1/SERPINE2	2	0.689655172413793
BP	GO:0030500	regulation of bone mineralization	3/108	83/18903	0.0119716700871099	0.0258391033925028	0.0118396815994715	S1PR1/TGFB1/TWIST1	3	0.36144578313253
BP	GO:0042310	vasoconstriction	3/108	83/18903	0.0119716700871099	0.0258391033925028	0.0118396815994715	LEP/ADM/PTGS2	3	0.36144578313253
BP	GO:0050848	regulation of calcium-mediated signaling	3/108	83/18903	0.0119716700871099	0.0258391033925028	0.0118396815994715	IGF1/PPP3CB/TNF	3	0.36144578313253
BP	GO:0055013	cardiac muscle cell development	3/108	83/18903	0.0119716700871099	0.0258391033925028	0.0118396815994715	IGF1/PROX1/VEGFA	3	0.36144578313253
BP	GO:0010675	regulation of cellular carbohydrate metabolic process	4/108	155/18903	0.012062631228232	0.0260192082941678	0.011922207090307	LEP/IGF1/AKT1/IRS1	4	0.258064516129032
BP	GO:0015980	energy derivation by oxidation of organic compounds	6/108	333/18903	0.0121949042129531	0.0262881434528292	0.0120454353076754	LEP/IGF1/PIK3CA/AKT1/IRS1/TNF	6	0.18018018018018
BP	GO:0010921	regulation of phosphatase activity	3/108	84/18903	0.0123643670619298	0.0266202977415428	0.0121976310305893	ITGA1/SEMA4D/TNF	3	0.357142857142857
BP	GO:0051851	modulation by host of symbiont process	3/108	84/18903	0.0123643670619298	0.0266202977415428	0.0121976310305893	SMARCA4/JUN/CCL5	3	0.357142857142857
BP	GO:0042445	hormone metabolic process	5/108	241/18903	0.0124577170098776	0.026804609253074	0.012282084023346	GHR/LEP/EGR1/CYP26B1/ADM	5	0.20746887966805
BP	GO:0007189	adenylate cyclase-activating G protein-coupled receptor signaling pathway	4/108	157/18903	0.0125947699766412	0.027082666869026	0.0124094922228168	S1PR1/LPAR1/ADM/PTGER1	4	0.254777070063694
BP	GO:0002360	T cell lineage commitment	2/108	30/18903	0.0126758045092207	0.0270886637104457	0.0124122400229991	FOXP3/IL6	2	0.666666666666667
BP	GO:0002825	regulation of T-helper 1 type immune response	2/108	30/18903	0.0126758045092207	0.0270886637104457	0.0124122400229991	CCL19/IL1B	2	0.666666666666667
BP	GO:0010464	regulation of mesenchymal cell proliferation	2/108	30/18903	0.0126758045092207	0.0270886637104457	0.0124122400229991	KDR/SIX1	2	0.666666666666667
BP	GO:0021602	cranial nerve morphogenesis	2/108	30/18903	0.0126758045092207	0.0270886637104457	0.0124122400229991	NRP1/SIX1	2	0.666666666666667
BP	GO:0034368	protein-lipid complex remodeling	2/108	30/18903	0.0126758045092207	0.0270886637104457	0.0124122400229991	PLA2G10/PLA2G2A	2	0.666666666666667
BP	GO:0034369	plasma lipoprotein particle remodeling	2/108	30/18903	0.0126758045092207	0.0270886637104457	0.0124122400229991	PLA2G10/PLA2G2A	2	0.666666666666667
BP	GO:0045940	positive regulation of steroid metabolic process	2/108	30/18903	0.0126758045092207	0.0270886637104457	0.0124122400229991	ADM/TNF	2	0.666666666666667
BP	GO:0072539	T-helper 17 cell differentiation	2/108	30/18903	0.0126758045092207	0.0270886637104457	0.0124122400229991	FOXP3/IL6	2	0.666666666666667
BP	GO:1903205	regulation of hydrogen peroxide-induced cell death	2/108	30/18903	0.0126758045092207	0.0270886637104457	0.0124122400229991	MET/HGF	2	0.666666666666667
BP	GO:2000108	positive regulation of leukocyte apoptotic process	2/108	30/18903	0.0126758045092207	0.0270886637104457	0.0124122400229991	CDKN2A/CCL5	2	0.666666666666667
BP	GO:0001678	cellular glucose homeostasis	4/108	158/18903	0.0128663863108207	0.0274591033610772	0.0125819784016368	SMARCA4/PIK3R1/PPP3CB/PIK3CA	4	0.253164556962025
BP	GO:0044409	entry into host	4/108	158/18903	0.0128663863108207	0.0274591033610772	0.0125819784016368	NRP1/EPHA2/CXCR4/ITGB1	4	0.253164556962025
BP	GO:0046395	carboxylic acid catabolic process	5/108	243/18903	0.0128729418703144	0.0274591033610772	0.0125819784016368	LEP/CYP26B1/AKT1/TWIST1/IRS1	5	0.205761316872428
BP	GO:0002088	lens development in camera-type eye	3/108	86/18903	0.0131717814293328	0.0280619737282154	0.0128582183734442	FGF2/PROX1/EPHA2	3	0.348837209302326
BP	GO:0032092	positive regulation of protein binding	3/108	86/18903	0.0131717814293328	0.0280619737282154	0.0128582183734442	NRP1/MMP9/TIAM1	3	0.348837209302326
BP	GO:0120254	olefinic compound metabolic process	4/108	160/18903	0.0134207987675428	0.0285749110290487	0.0130932503027688	EGR1/PLA2G10/ADM/PTGS2	4	0.25
BP	GO:0033561	regulation of water loss via skin	2/108	31/18903	0.0134999549958224	0.0286553305919908	0.013130099182745	CYP26B1/MET	2	0.645161290322581
BP	GO:0045948	positive regulation of translational initiation	2/108	31/18903	0.0134999549958224	0.0286553305919908	0.013130099182745	CCL5/TNF	2	0.645161290322581
BP	GO:0097205	renal filtration	2/108	31/18903	0.0134999549958224	0.0286553305919908	0.013130099182745	MCAM/SULF2	2	0.645161290322581
BP	GO:0098868	bone growth	2/108	31/18903	0.0134999549958224	0.0286553305919908	0.013130099182745	LEP/FGFR3	2	0.645161290322581
BP	GO:1902042	negative regulation of extrinsic apoptotic signaling pathway via death domain receptors	2/108	31/18903	0.0134999549958224	0.0286553305919908	0.013130099182745	HGF/SERPINE1	2	0.645161290322581
BP	GO:0045069	regulation of viral genome replication	3/108	87/18903	0.0135865375922849	0.0287861647151104	0.0131900484130474	PROX1/CCL5/TNF	3	0.344827586206897
BP	GO:0048145	regulation of fibroblast proliferation	3/108	87/18903	0.0135865375922849	0.0287861647151104	0.0131900484130474	FN1/IGF1/JUN	3	0.344827586206897
BP	GO:2000243	positive regulation of reproductive process	3/108	87/18903	0.0135865375922849	0.0287861647151104	0.0131900484130474	PLA2G10/VEGFA/RETN	3	0.344827586206897
BP	GO:0016054	organic acid catabolic process	5/108	247/18903	0.0137313486017598	0.029075185846662	0.0133224801821033	LEP/CYP26B1/AKT1/TWIST1/IRS1	5	0.202429149797571
BP	GO:0050792	regulation of viral process	4/108	162/18903	0.0139902291376664	0.0295719897795757	0.0135501196746087	PROX1/CXCR4/CCL5/TNF	4	0.246913580246914
BP	GO:0002312	B cell activation involved in immune response	3/108	88/18903	0.0140086837777308	0.0295719897795757	0.0135501196746087	FOXP3/IL6/TGFB1	3	0.340909090909091
BP	GO:0043367	CD4-positive, alpha-beta T cell differentiation	3/108	88/18903	0.0140086837777308	0.0295719897795757	0.0135501196746087	FOXP3/IL6/CCL19	3	0.340909090909091
BP	GO:0055072	iron ion homeostasis	3/108	88/18903	0.0140086837777308	0.0295719897795757	0.0135501196746087	EPAS1/SCARA5/LCN2	3	0.340909090909091
BP	GO:1901983	regulation of protein acetylation	3/108	88/18903	0.0140086837777308	0.0295719897795757	0.0135501196746087	FOXP3/TWIST1/GATA2	3	0.340909090909091
BP	GO:0010506	regulation of autophagy	6/108	344/18903	0.0141207070526928	0.0297903033616225	0.0136501526850817	LEP/KDR/MET/PIK3CA/AKT1/HGF	6	0.174418604651163
BP	GO:0010743	regulation of macrophage derived foam cell differentiation	2/108	32/18903	0.0143467937851727	0.0300112387216121	0.0137513870149501	PLA2G10/PLA2G2A	2	0.625
BP	GO:0014044	Schwann cell development	2/108	32/18903	0.0143467937851727	0.0300112387216121	0.0137513870149501	NTRK2/AKT1	2	0.625
BP	GO:0033198	response to ATP	2/108	32/18903	0.0143467937851727	0.0300112387216121	0.0137513870149501	PTGS2/IL1B	2	0.625
BP	GO:0034367	protein-containing complex remodeling	2/108	32/18903	0.0143467937851727	0.0300112387216121	0.0137513870149501	PLA2G10/PLA2G2A	2	0.625
BP	GO:0034390	smooth muscle cell apoptotic process	2/108	32/18903	0.0143467937851727	0.0300112387216121	0.0137513870149501	IGF1/CDKN2A	2	0.625
BP	GO:0034391	regulation of smooth muscle cell apoptotic process	2/108	32/18903	0.0143467937851727	0.0300112387216121	0.0137513870149501	IGF1/CDKN2A	2	0.625
BP	GO:0035115	embryonic forelimb morphogenesis	2/108	32/18903	0.0143467937851727	0.0300112387216121	0.0137513870149501	TWIST1/RSPO2	2	0.625
BP	GO:0046825	regulation of protein export from nucleus	2/108	32/18903	0.0143467937851727	0.0300112387216121	0.0137513870149501	PTPN14/IL1B	2	0.625
BP	GO:0048665	neuron fate specification	2/108	32/18903	0.0143467937851727	0.0300112387216121	0.0137513870149501	HOXD10/SIX1	2	0.625
BP	GO:0048710	regulation of astrocyte differentiation	2/108	32/18903	0.0143467937851727	0.0300112387216121	0.0137513870149501	IL6/SERPINE2	2	0.625
BP	GO:0050482	arachidonic acid secretion	2/108	32/18903	0.0143467937851727	0.0300112387216121	0.0137513870149501	PLA2G10/PLA2G2A	2	0.625
BP	GO:0051482	positive regulation of cytosolic calcium ion concentration involved in phospholipase C-activating G protein-coupled signaling pathway	2/108	32/18903	0.0143467937851727	0.0300112387216121	0.0137513870149501	S1PR1/LPAR1	2	0.625
BP	GO:0061036	positive regulation of cartilage development	2/108	32/18903	0.0143467937851727	0.0300112387216121	0.0137513870149501	ACVRL1/LOXL2	2	0.625
BP	GO:1903963	arachidonate transport	2/108	32/18903	0.0143467937851727	0.0300112387216121	0.0137513870149501	PLA2G10/PLA2G2A	2	0.625
BP	GO:0000082	G1/S transition of mitotic cell cycle	5/108	250/18903	0.0143999623317649	0.030104269077639	0.0137940142600875	ADAMTS1/SMARCA4/CDKN2A/ITGB1/AKT1	5	0.2
BP	GO:0034644	cellular response to UV	3/108	89/18903	0.0144382366773922	0.0301660684231333	0.0138223312091161	PIK3R1/MMP9/PTGS2	3	0.337078651685393
BP	GO:0072594	establishment of protein localization to organelle	7/108	449/18903	0.0145709962957185	0.0304146981468012	0.0139362553155248	LEP/ELAVL1/PIK3R1/TGFB1/AKT1/PTGS2/CDH1	7	0.155902004454343
BP	GO:0051100	negative regulation of binding	4/108	164/18903	0.0145748076907982	0.0304146981468012	0.0139362553155248	JUN/AKT1/NES/ITGA4	4	0.24390243902439
BP	GO:0098657	import into cell	5/108	252/18903	0.0148576800751044	0.0309669174441397	0.014189286566426	PPP3CB/ITGB1/AKT1/ITGA4/TNF	5	0.198412698412698
BP	GO:0051494	negative regulation of cytoskeleton organization	4/108	165/18903	0.0148728171287496	0.0309669174441397	0.014189286566426	S1PR1/PIK3R1/MET/PIK3CA	4	0.242424242424242
BP	GO:0006029	proteoglycan metabolic process	3/108	90/18903	0.0148752119322947	0.0309669174441397	0.014189286566426	IGF1/SULF2/HPSE	3	0.333333333333333
BP	GO:0055006	cardiac cell development	3/108	90/18903	0.0148752119322947	0.0309669174441397	0.014189286566426	IGF1/PROX1/VEGFA	3	0.333333333333333
BP	GO:0007009	plasma membrane organization	4/108	166/18903	0.0151746606124539	0.0315625701618067	0.0144622193541435	TIE1/CD9/CXCR4/AKT1	4	0.240963855421687
BP	GO:0001782	B cell homeostasis	2/108	33/18903	0.0152160397458276	0.0315625701618067	0.0144622193541435	FOXP3/SOS1	2	0.606060606060606
BP	GO:0045943	positive regulation of transcription by RNA polymerase I	2/108	33/18903	0.0152160397458276	0.0315625701618067	0.0144622193541435	SMARCA4/ERBB2	2	0.606060606060606
BP	GO:0060351	cartilage development involved in endochondral bone morphogenesis	2/108	33/18903	0.0152160397458276	0.0315625701618067	0.0144622193541435	GHR/COL1A1	2	0.606060606060606
BP	GO:0090183	regulation of kidney development	2/108	33/18903	0.0152160397458276	0.0315625701618067	0.0144622193541435	VEGFA/SIX1	2	0.606060606060606
BP	GO:1902992	negative regulation of amyloid precursor protein catabolic process	2/108	33/18903	0.0152160397458276	0.0315625701618067	0.0144622193541435	IGF1/NTRK2	2	0.606060606060606
BP	GO:0042113	B cell activation	6/108	350/18903	0.0152562631903561	0.0316270557874328	0.0144917671779809	FOXP3/PIK3R1/IL6/ITGB1/TGFB1/ITGA4	6	0.171428571428571
BP	GO:0042475	odontogenesis of dentin-containing tooth	3/108	91/18903	0.0153196241473639	0.0317014577394942	0.0145258587410434	ADM/SERPINE1/RSPO2	3	0.32967032967033
BP	GO:0048525	negative regulation of viral process	3/108	91/18903	0.0153196241473639	0.0317014577394942	0.0145258587410434	PROX1/CCL5/TNF	3	0.32967032967033
BP	GO:1901216	positive regulation of neuron death	3/108	91/18903	0.0153196241473639	0.0317014577394942	0.0145258587410434	EGR1/ITGA1/TNF	3	0.32967032967033
BP	GO:0006936	muscle contraction	6/108	351/18903	0.0154515190629177	0.031955292112199	0.0146421676588172	VEGFB/CXCR4/SULF2/PIK3CA/PTGS2/TNF	6	0.170940170940171
BP	GO:0001959	regulation of cytokine-mediated signaling pathway	4/108	167/18903	0.0154803532755681	0.0319767201909407	0.014651986174024	IL6/CXCR4/CD24/CCL5	4	0.239520958083832
BP	GO:0030509	BMP signaling pathway	4/108	167/18903	0.0154803532755681	0.0319767201909407	0.014651986174024	EGR1/ACVRL1/KDR/TGFB1	4	0.239520958083832
BP	GO:0001656	metanephros development	3/108	92/18903	0.0157714869058734	0.0325392655948353	0.0149097489286439	EGR1/SIX1/NKX3-1	3	0.326086956521739
BP	GO:0001843	neural tube closure	3/108	92/18903	0.0157714869058734	0.0325392655948353	0.0149097489286439	TGFB1/ADM/TWIST1	3	0.326086956521739
BP	GO:0002021	response to dietary excess	2/108	34/18903	0.0161074141658546	0.0331139357732711	0.0151730673508831	LEP/TBL1XR1	2	0.588235294117647
BP	GO:0009954	proximal/distal pattern formation	2/108	34/18903	0.0161074141658546	0.0331139357732711	0.0151730673508831	CYP26B1/HOXD10	2	0.588235294117647
BP	GO:0021696	cerebellar cortex morphogenesis	2/108	34/18903	0.0161074141658546	0.0331139357732711	0.0151730673508831	PROX1/SERPINE2	2	0.588235294117647
BP	GO:0034405	response to fluid shear stress	2/108	34/18903	0.0161074141658546	0.0331139357732711	0.0151730673508831	AKT1/PTGS2	2	0.588235294117647
BP	GO:0036474	cell death in response to hydrogen peroxide	2/108	34/18903	0.0161074141658546	0.0331139357732711	0.0151730673508831	MET/HGF	2	0.588235294117647
BP	GO:0110110	positive regulation of animal organ morphogenesis	2/108	34/18903	0.0161074141658546	0.0331139357732711	0.0151730673508831	FGF2/SIX1	2	0.588235294117647
BP	GO:0006835	dicarboxylic acid transport	3/108	93/18903	0.0162308127837477	0.0333082832586453	0.0152621189062539	NTRK2/ITGB1/TNF	3	0.32258064516129
BP	GO:0060606	tube closure	3/108	93/18903	0.0162308127837477	0.0333082832586453	0.0152621189062539	TGFB1/ADM/TWIST1	3	0.32258064516129
BP	GO:0070301	cellular response to hydrogen peroxide	3/108	93/18903	0.0162308127837477	0.0333082832586453	0.0152621189062539	IL6/MET/HGF	3	0.32258064516129
BP	GO:0030041	actin filament polymerization	4/108	170/18903	0.0164206738343846	0.0336779459802366	0.0154315012898588	GRB2/CCL21/CCR7/ARF6	4	0.235294117647059
BP	GO:0016311	dephosphorylation	6/108	357/18903	0.0166596876205641	0.0341479209842469	0.0156468475548846	PTPN14/ITGA1/PPP3CB/TGFB1/SEMA4D/TNF	6	0.168067226890756
BP	GO:0035304	regulation of protein dephosphorylation	3/108	94/18903	0.01669761336372	0.0341851788676515	0.0156639194118249	ITGA1/TGFB1/TNF	3	0.319148936170213
BP	GO:0048704	embryonic skeletal system morphogenesis	3/108	94/18903	0.01669761336372	0.0341851788676515	0.0156639194118249	TWIST1/HOXD10/SIX1	3	0.319148936170213
BP	GO:0090068	positive regulation of cell cycle process	5/108	260/18903	0.0167861596975415	0.0343461494520619	0.015737677407114	ADAMTS1/IGF1/AKT1/IL1B/TNF	5	0.192307692307692
BP	GO:0001893	maternal placenta development	2/108	35/18903	0.0170206407347833	0.0346824356820598	0.015891766418214	AKT1/PTGS2	2	0.571428571428571
BP	GO:0016242	negative regulation of macroautophagy	2/108	35/18903	0.0170206407347833	0.0346824356820598	0.015891766418214	PIK3CA/AKT1	2	0.571428571428571
BP	GO:0031128	developmental induction	2/108	35/18903	0.0170206407347833	0.0346824356820598	0.015891766418214	FGF2/SIX1	2	0.571428571428571
BP	GO:0042462	eye photoreceptor cell development	2/108	35/18903	0.0170206407347833	0.0346824356820598	0.015891766418214	NTRK2/VEGFA	2	0.571428571428571
BP	GO:0043372	positive regulation of CD4-positive, alpha-beta T cell differentiation	2/108	35/18903	0.0170206407347833	0.0346824356820598	0.015891766418214	FOXP3/CCL19	2	0.571428571428571
BP	GO:0048048	embryonic eye morphogenesis	2/108	35/18903	0.0170206407347833	0.0346824356820598	0.015891766418214	PROX1/TWIST1	2	0.571428571428571
BP	GO:0070528	protein kinase C signaling	2/108	35/18903	0.0170206407347833	0.0346824356820598	0.015891766418214	FLT4/VEGFA	2	0.571428571428571
BP	GO:0006470	protein dephosphorylation	5/108	261/18903	0.0170383677106304	0.0346981347142368	0.0158989598389598	PTPN14/ITGA1/PPP3CB/TGFB1/TNF	5	0.191570881226054
BP	GO:0042982	amyloid precursor protein metabolic process	3/108	95/18903	0.0171718992493468	0.0349495092305931	0.0160141416310936	IGF1/NTRK2/TNF	3	0.315789473684211
BP	GO:0010038	response to metal ion	6/108	360/18903	0.0172876392017131	0.0351643988932613	0.0161126057746191	MMP9/JUN/AKT1/PTGS2/LOXL2/CDH1	6	0.166666666666667
BP	GO:1903522	regulation of blood circulation	5/108	263/18903	0.0175503240797919	0.0356777580529886	0.0163478310030265	EPAS1/LEP/ADM/PTGS2/TNF	5	0.190114068441065
BP	GO:0032091	negative regulation of protein binding	3/108	96/18903	0.0176536800788803	0.0358668077658941	0.016434455077139	AKT1/NES/ITGA4	3	0.3125
BP	GO:0030224	monocyte differentiation	2/108	36/18903	0.017955445525681	0.0364371350585626	0.0166957835547611	JUN/VEGFA	2	0.555555555555556
BP	GO:0043243	positive regulation of protein-containing complex disassembly	2/108	36/18903	0.017955445525681	0.0364371350585626	0.0166957835547611	NES/TNF	2	0.555555555555556
BP	GO:0010469	regulation of signaling receptor activity	4/108	175/18903	0.0180661964909426	0.036597526185865	0.016769276038219	NRP1/ITGB1/SERPINE1/TNF	4	0.228571428571429
BP	GO:0031056	regulation of histone modification	4/108	175/18903	0.0180661964909426	0.036597526185865	0.016769276038219	FOXP3/TWIST1/VEGFA/GATA2	4	0.228571428571429
BP	GO:0051048	negative regulation of secretion	4/108	175/18903	0.0180661964909426	0.036597526185865	0.016769276038219	LEP/IRS1/IL1B/TNF	4	0.228571428571429
BP	GO:0001657	ureteric bud development	3/108	97/18903	0.0181429645389996	0.0366886350665985	0.0168110228481754	FGF2/VEGFA/SIX1	3	0.309278350515464
BP	GO:0008593	regulation of Notch signaling pathway	3/108	97/18903	0.0181429645389996	0.0366886350665985	0.0168110228481754	POSTN/AKT1/GATA2	3	0.309278350515464
BP	GO:0060993	kidney morphogenesis	3/108	97/18903	0.0181429645389996	0.0366886350665985	0.0168110228481754	FGF2/VEGFA/SIX1	3	0.309278350515464
BP	GO:0030522	intracellular receptor signaling pathway	5/108	266/18903	0.018337252552933	0.0370598764379766	0.016981128581602	LEP/SMARCA4/CYP26B1/TWIST1/NKX3-1	5	0.18796992481203
BP	GO:0014020	primary neural tube formation	3/108	98/18903	0.0186397603784032	0.0375834888934372	0.0172210519512329	TGFB1/ADM/TWIST1	3	0.306122448979592
BP	GO:0021510	spinal cord development	3/108	98/18903	0.0186397603784032	0.0375834888934372	0.0172210519512329	PROX1/HOXD10/GATA2	3	0.306122448979592
BP	GO:0072163	mesonephric epithelium development	3/108	98/18903	0.0186397603784032	0.0375834888934372	0.0172210519512329	FGF2/VEGFA/SIX1	3	0.306122448979592
BP	GO:0072164	mesonephric tubule development	3/108	98/18903	0.0186397603784032	0.0375834888934372	0.0172210519512329	FGF2/VEGFA/SIX1	3	0.306122448979592
BP	GO:0051924	regulation of calcium ion transport	5/108	268/18903	0.0188746433266693	0.0378887790830961	0.0173609383314257	CXCL12/PPP3CB/CXCR4/PTGS2/CCL5	5	0.186567164179104
BP	GO:0002068	glandular epithelial cell development	2/108	37/18903	0.0189115569773513	0.0378887790830961	0.0173609383314257	AKT1/GATA2	2	0.540540540540541
BP	GO:0003230	cardiac atrium development	2/108	37/18903	0.0189115569773513	0.0378887790830961	0.0173609383314257	PROX1/SOS1	2	0.540540540540541
BP	GO:0008207	C21-steroid hormone metabolic process	2/108	37/18903	0.0189115569773513	0.0378887790830961	0.0173609383314257	EGR1/ADM	2	0.540540540540541
BP	GO:0010092	specification of animal organ identity	2/108	37/18903	0.0189115569773513	0.0378887790830961	0.0173609383314257	FGF2/SIX1	2	0.540540540540541
BP	GO:0010923	negative regulation of phosphatase activity	2/108	37/18903	0.0189115569773513	0.0378887790830961	0.0173609383314257	SEMA4D/TNF	2	0.540540540540541
BP	GO:0044319	wound healing, spreading of cells	2/108	37/18903	0.0189115569773513	0.0378887790830961	0.0173609383314257	ACVRL1/ITGB1	2	0.540540540540541
BP	GO:0046473	phosphatidic acid metabolic process	2/108	37/18903	0.0189115569773513	0.0378887790830961	0.0173609383314257	PLA2G10/PLA2G2A	2	0.540540540540541
BP	GO:0055023	positive regulation of cardiac muscle tissue growth	2/108	37/18903	0.0189115569773513	0.0378887790830961	0.0173609383314257	IGF1/FGF2	2	0.540540540540541
BP	GO:0090505	epiboly involved in wound healing	2/108	37/18903	0.0189115569773513	0.0378887790830961	0.0173609383314257	ACVRL1/ITGB1	2	0.540540540540541
BP	GO:1902745	positive regulation of lamellipodium organization	2/108	37/18903	0.0189115569773513	0.0378887790830961	0.0173609383314257	PIK3R1/PIK3CA	2	0.540540540540541
BP	GO:0071772	response to BMP	4/108	178/18903	0.0191010900307195	0.0382242622464456	0.0175146593710339	EGR1/ACVRL1/KDR/TGFB1	4	0.224719101123595
BP	GO:0071773	cellular response to BMP stimulus	4/108	178/18903	0.0191010900307195	0.0382242622464456	0.0175146593710339	EGR1/ACVRL1/KDR/TGFB1	4	0.224719101123595
BP	GO:0044264	cellular polysaccharide metabolic process	3/108	99/18903	0.0191440744212613	0.0382881488425226	0.0175439327147926	IGF1/AKT1/IRS1	3	0.303030303030303
BP	GO:0060759	regulation of response to cytokine stimulus	4/108	179/18903	0.0194540599554358	0.0388856556384058	0.0178177150558173	IL6/CXCR4/CD24/CCL5	4	0.223463687150838
BP	GO:0019080	viral gene expression	3/108	100/18903	0.0196559125805326	0.0392438116227242	0.0179818249613687	SMARCA4/JUN/CCL5	3	0.3
BP	GO:0030316	osteoclast differentiation	3/108	100/18903	0.0196559125805326	0.0392438116227242	0.0179818249613687	PIK3R1/EPHA2/TNF	3	0.3
BP	GO:0003203	endocardial cushion morphogenesis	2/108	38/18903	0.0198887058766548	0.0395035569391732	0.0181008423203302	ACVRL1/TWIST1	2	0.526315789473684
BP	GO:0014037	Schwann cell differentiation	2/108	38/18903	0.0198887058766548	0.0395035569391732	0.0181008423203302	NTRK2/AKT1	2	0.526315789473684
BP	GO:0040036	regulation of fibroblast growth factor receptor signaling pathway	2/108	38/18903	0.0198887058766548	0.0395035569391732	0.0181008423203302	FGF2/SULF2	2	0.526315789473684
BP	GO:0043368	positive T cell selection	2/108	38/18903	0.0198887058766548	0.0395035569391732	0.0181008423203302	FOXP3/IL6	2	0.526315789473684
BP	GO:0045191	regulation of isotype switching	2/108	38/18903	0.0198887058766548	0.0395035569391732	0.0181008423203302	FOXP3/TGFB1	2	0.526315789473684
BP	GO:0045742	positive regulation of epidermal growth factor receptor signaling pathway	2/108	38/18903	0.0198887058766548	0.0395035569391732	0.0181008423203302	MMP9/SOS1	2	0.526315789473684
BP	GO:0045746	negative regulation of Notch signaling pathway	2/108	38/18903	0.0198887058766548	0.0395035569391732	0.0181008423203302	AKT1/GATA2	2	0.526315789473684
BP	GO:0048741	skeletal muscle fiber development	2/108	38/18903	0.0198887058766548	0.0395035569391732	0.0181008423203302	PPP3CB/SIX1	2	0.526315789473684
BP	GO:0090504	epiboly	2/108	38/18903	0.0198887058766548	0.0395035569391732	0.0181008423203302	ACVRL1/ITGB1	2	0.526315789473684
BP	GO:0045862	positive regulation of proteolysis	6/108	372/18903	0.0199628769256028	0.0396281421539202	0.0181579282513782	FN1/CCBE1/AKT1/NKX3-1/IL1B/TNF	6	0.161290322580645
BP	GO:0031348	negative regulation of defense response	5/108	272/18903	0.0199804050849039	0.0396402076813395	0.0181634567714976	TEK/FOXP3/IGF1/PLA2G10/HGF	5	0.183823529411765
BP	GO:0006941	striated muscle contraction	4/108	181/18903	0.0201720791210715	0.0399810068196336	0.0183196136328827	VEGFB/CXCR4/PIK3CA/TNF	4	0.220994475138122
BP	GO:0021549	cerebellum development	3/108	101/18903	0.0201752798711438	0.0399810068196336	0.0183196136328827	PROX1/LPAR1/SERPINE2	3	0.297029702970297
BP	GO:0007611	learning or memory	5/108	273/18903	0.0202633515301547	0.040132564643819	0.018389058626968	NTRK2/PPP3CB/ITGB1/PTGS2/NGF	5	0.183150183150183
BP	GO:0001823	mesonephros development	3/108	102/18903	0.0207021804230345	0.0409314383920877	0.0187551088986823	FGF2/VEGFA/SIX1	3	0.294117647058824
BP	GO:0016575	histone deacetylation	3/108	102/18903	0.0207021804230345	0.0409314383920877	0.0187551088986823	FOXP3/TBL1XR1/VEGFA	3	0.294117647058824
BP	GO:0035249	synaptic transmission, glutamatergic	3/108	102/18903	0.0207021804230345	0.0409314383920877	0.0187551088986823	SERPINE2/PTGS2/TNF	3	0.294117647058824
BP	GO:0003016	respiratory system process	2/108	39/18903	0.0208866253409527	0.0411938192879803	0.0188753339009962	FLT4/CCBE1	2	0.512820512820513
BP	GO:0032350	regulation of hormone metabolic process	2/108	39/18903	0.0208866253409527	0.0411938192879803	0.0188753339009962	EGR1/ADM	2	0.512820512820513
BP	GO:0043403	skeletal muscle tissue regeneration	2/108	39/18903	0.0208866253409527	0.0411938192879803	0.0188753339009962	IGF1/CD9	2	0.512820512820513
BP	GO:0007219	Notch signaling pathway	4/108	183/18903	0.020906279748406	0.0411938192879803	0.0188753339009962	POSTN/AKT1/SIX1/GATA2	4	0.218579234972678
BP	GO:0044000	movement in host	4/108	183/18903	0.020906279748406	0.0411938192879803	0.0188753339009962	NRP1/EPHA2/CXCR4/ITGB1	4	0.218579234972678
BP	GO:0071466	cellular response to xenobiotic stimulus	4/108	183/18903	0.020906279748406	0.0411938192879803	0.0188753339009962	CYP26B1/CXCR4/NKX3-1/IL1B	4	0.218579234972678
BP	GO:0042472	inner ear morphogenesis	3/108	103/18903	0.0212366174940686	0.0417496705079305	0.0191300293275719	PROX1/SIX1/GATA2	3	0.29126213592233
BP	GO:0045639	positive regulation of myeloid cell differentiation	3/108	103/18903	0.0212366174940686	0.0417496705079305	0.0191300293275719	TGFB1/GATA2/TNF	3	0.29126213592233
BP	GO:0050764	regulation of phagocytosis	3/108	103/18903	0.0212366174940686	0.0417496705079305	0.0191300293275719	IL1B/GATA2/TNF	3	0.29126213592233
BP	GO:0070167	regulation of biomineral tissue development	3/108	103/18903	0.0212366174940686	0.0417496705079305	0.0191300293275719	S1PR1/TGFB1/TWIST1	3	0.29126213592233
BP	GO:0006417	regulation of translation	7/108	486/18903	0.0214839034622019	0.0422118466436679	0.0193418020894547	ELAVL1/IL6/ERBB2/RPS6KA1/AKT1/CCL5/TNF	7	0.1440329218107
BP	GO:2000045	regulation of G1/S transition of mitotic cell cycle	4/108	185/18903	0.0216567491206628	0.0425273201677452	0.019486354554043	ADAMTS1/SMARCA4/CDKN2A/AKT1	4	0.216216216216216
BP	GO:0030201	heparan sulfate proteoglycan metabolic process	2/108	40/18903	0.021905050800671	0.0428447942779226	0.0196318237030099	SULF2/HPSE	2	0.5
BP	GO:0030866	cortical actin cytoskeleton organization	2/108	40/18903	0.021905050800671	0.0428447942779226	0.0196318237030099	ARF6/TNF	2	0.5
BP	GO:0035886	vascular associated smooth muscle cell differentiation	2/108	40/18903	0.021905050800671	0.0428447942779226	0.0196318237030099	ADM/VEGFA	2	0.5
BP	GO:0046627	negative regulation of insulin receptor signaling pathway	2/108	40/18903	0.021905050800671	0.0428447942779226	0.0196318237030099	IRS1/IL1B	2	0.5
BP	GO:0090278	negative regulation of peptide hormone secretion	2/108	40/18903	0.021905050800671	0.0428447942779226	0.0196318237030099	LEP/IRS1	2	0.5
BP	GO:0140467	integrated stress response signaling	2/108	40/18903	0.021905050800671	0.0428447942779226	0.0196318237030099	JUN/CEBPD	2	0.5
BP	GO:1901186	positive regulation of ERBB signaling pathway	2/108	40/18903	0.021905050800671	0.0428447942779226	0.0196318237030099	MMP9/SOS1	2	0.5
BP	GO:0110149	regulation of biomineralization	3/108	105/18903	0.0223281099411832	0.0436476096083434	0.0199996800388499	S1PR1/TGFB1/TWIST1	3	0.285714285714286
BP	GO:0051258	protein polymerization	5/108	281/18903	0.0226219401790666	0.0441970411399145	0.0202514339134213	MET/GRB2/CCL21/CCR7/ARF6	5	0.177935943060498
BP	GO:0001841	neural tube formation	3/108	106/18903	0.0228851675869632	0.0446493302853454	0.0204586763781251	TGFB1/ADM/TWIST1	3	0.283018867924528
BP	GO:0002792	negative regulation of peptide secretion	2/108	41/18903	0.0229437199819843	0.0446493302853454	0.0204586763781251	LEP/IRS1	2	0.48780487804878
BP	GO:0030513	positive regulation of BMP signaling pathway	2/108	41/18903	0.0229437199819843	0.0446493302853454	0.0204586763781251	ACVRL1/KDR	2	0.48780487804878
BP	GO:0032733	positive regulation of interleukin-10 production	2/108	41/18903	0.0229437199819843	0.0446493302853454	0.0204586763781251	IL6/HGF	2	0.48780487804878
BP	GO:0045124	regulation of bone resorption	2/108	41/18903	0.0229437199819843	0.0446493302853454	0.0204586763781251	S1PR1/IL6	2	0.48780487804878
BP	GO:0120178	steroid hormone biosynthetic process	2/108	41/18903	0.0229437199819843	0.0446493302853454	0.0204586763781251	EGR1/ADM	2	0.48780487804878
BP	GO:1901031	regulation of response to reactive oxygen species	2/108	41/18903	0.0229437199819843	0.0446493302853454	0.0204586763781251	MET/HGF	2	0.48780487804878
BP	GO:0002027	regulation of heart rate	3/108	107/18903	0.0234497663161905	0.0456084780823885	0.0208981654869894	EPAS1/ADM/TNF	3	0.280373831775701
BP	GO:0002714	positive regulation of B cell mediated immunity	2/108	42/18903	0.0240023728896203	0.0464862134464909	0.0213003507749891	TGFB1/TNF	2	0.476190476190476
BP	GO:0002891	positive regulation of immunoglobulin mediated immune response	2/108	42/18903	0.0240023728896203	0.0464862134464909	0.0213003507749891	TGFB1/TNF	2	0.476190476190476
BP	GO:0010463	mesenchymal cell proliferation	2/108	42/18903	0.0240023728896203	0.0464862134464909	0.0213003507749891	KDR/SIX1	2	0.476190476190476
BP	GO:0021587	cerebellum morphogenesis	2/108	42/18903	0.0240023728896203	0.0464862134464909	0.0213003507749891	PROX1/SERPINE2	2	0.476190476190476
BP	GO:1900077	negative regulation of cellular response to insulin stimulus	2/108	42/18903	0.0240023728896203	0.0464862134464909	0.0213003507749891	IRS1/IL1B	2	0.476190476190476
BP	GO:2000249	regulation of actin cytoskeleton reorganization	2/108	42/18903	0.0240023728896203	0.0464862134464909	0.0213003507749891	TEK/NRP1	2	0.476190476190476
BP	GO:0007631	feeding behavior	3/108	108/18903	0.0240219052154166	0.0464862134464909	0.0213003507749891	LEP/NTRK2/RETN	3	0.277777777777778
BP	GO:0019882	antigen processing and presentation	3/108	108/18903	0.0240219052154166	0.0464862134464909	0.0213003507749891	CCL21/CCR7/CCL19	3	0.277777777777778
BP	GO:0090398	cellular senescence	3/108	108/18903	0.0240219052154166	0.0464862134464909	0.0213003507749891	CDKN2A/TWIST1/MAPK11	3	0.277777777777778
BP	GO:1904063	negative regulation of cation transmembrane transport	3/108	109/18903	0.0246015825738398	0.0475813848439293	0.0218021669736998	MMP9/PPP3CB/TWIST1	3	0.275229357798165
BP	GO:0006356	regulation of transcription by RNA polymerase I	2/108	43/18903	0.025080751789782	0.048373015429652	0.0221648983710315	SMARCA4/ERBB2	2	0.465116279069767
BP	GO:0043507	positive regulation of JUN kinase activity	2/108	43/18903	0.025080751789782	0.048373015429652	0.0221648983710315	CCL19/TNF	2	0.465116279069767
BP	GO:0045622	regulation of T-helper cell differentiation	2/108	43/18903	0.025080751789782	0.048373015429652	0.0221648983710315	FOXP3/CCL19	2	0.465116279069767
BP	GO:0051954	positive regulation of amine transport	2/108	43/18903	0.025080751789782	0.048373015429652	0.0221648983710315	CXCL12/ITGB1	2	0.465116279069767
BP	GO:1904037	positive regulation of epithelial cell apoptotic process	2/108	43/18903	0.025080751789782	0.048373015429652	0.0221648983710315	IL6/ITGA4	2	0.465116279069767
BP	GO:0009749	response to glucose	4/108	194/18903	0.0252373234816313	0.0486478919228326	0.0222908489548812	EGR1/SMARCA4/PPP3CB/PIK3CA	4	0.206185567010309
BP	GO:0022037	metencephalon development	3/108	111/18903	0.0257835419102212	0.0496455072820834	0.0227479642050837	PROX1/LPAR1/SERPINE2	3	0.27027027027027
BP	GO:1901222	regulation of NIK/NF-kappaB signaling	3/108	111/18903	0.0257835419102212	0.0496455072820834	0.0227479642050837	CCL19/IL1B/TNF	3	0.27027027027027
BP	GO:0006509	membrane protein ectodomain proteolysis	2/108	44/18903	0.0261786011931883	0.0502107021223368	0.023006940952404	IL1B/TNF	2	0.454545454545455
BP	GO:0016601	Rac protein signal transduction	2/108	44/18903	0.0261786011931883	0.0502107021223368	0.023006940952404	ARF6/TIAM1	2	0.454545454545455
BP	GO:0031063	regulation of histone deacetylation	2/108	44/18903	0.0261786011931883	0.0502107021223368	0.023006940952404	FOXP3/VEGFA	2	0.454545454545455
BP	GO:0042181	ketone biosynthetic process	2/108	44/18903	0.0261786011931883	0.0502107021223368	0.023006940952404	EGR1/ADM	2	0.454545454545455
BP	GO:0044058	regulation of digestive system process	2/108	44/18903	0.0261786011931883	0.0502107021223368	0.023006940952404	LEP/TYMP	2	0.454545454545455
BP	GO:0045214	sarcomere organization	2/108	44/18903	0.0261786011931883	0.0502107021223368	0.023006940952404	PROX1/ITGB1	2	0.454545454545455
BP	GO:0072538	T-helper 17 type immune response	2/108	44/18903	0.0261786011931883	0.0502107021223368	0.023006940952404	FOXP3/IL6	2	0.454545454545455
BP	GO:0002366	leukocyte activation involved in immune response	5/108	293/18903	0.026483212027904	0.050766821727909	0.0232617593553951	FOXP3/IL6/TGFB1/CCL19/GATA2	5	0.170648464163823
BP	GO:0007626	locomotory behavior	4/108	197/18903	0.026505586613189	0.0507815942749642	0.0232685282533282	EGR1/CXCL12/PPP3CB/HOXD10	4	0.203045685279188
BP	GO:0071897	DNA biosynthetic process	4/108	198/18903	0.0269367147294384	0.0515790411467455	0.0236339247189472	FGF2/ACVRL1/HGF/TNF	4	0.202020202020202
BP	GO:0046486	glycerolipid metabolic process	6/108	399/18903	0.0269852323846994	0.0516433800529736	0.0236634053147956	FGF2/PIK3R1/PLA2G10/PIK3CA/TBL1XR1/PLA2G2A	6	0.150375939849624
BP	GO:0006775	fat-soluble vitamin metabolic process	2/108	45/18903	0.0272956678382316	0.0521222294848085	0.0238828179128603	CYP26B1/TNF	2	0.444444444444444
BP	GO:0021575	hindbrain morphogenesis	2/108	45/18903	0.0272956678382316	0.0521222294848085	0.0238828179128603	PROX1/SERPINE2	2	0.444444444444444
BP	GO:0071827	plasma lipoprotein particle organization	2/108	45/18903	0.0272956678382316	0.0521222294848085	0.0238828179128603	PLA2G10/PLA2G2A	2	0.444444444444444
BP	GO:2000516	positive regulation of CD4-positive, alpha-beta T cell activation	2/108	45/18903	0.0272956678382316	0.0521222294848085	0.0238828179128603	FOXP3/CCL19	2	0.444444444444444
BP	GO:0044262	cellular carbohydrate metabolic process	5/108	296/18903	0.0275104339016926	0.0525033749546084	0.0240574617825397	LEP/PFKFB3/IGF1/AKT1/IRS1	5	0.168918918918919
BP	GO:0002263	cell activation involved in immune response	5/108	297/18903	0.0278584159178357	0.0531382016019544	0.0243483443747591	FOXP3/IL6/TGFB1/CCL19/GATA2	5	0.168350168350168
BP	GO:0032410	negative regulation of transporter activity	3/108	115/18903	0.0282377610957881	0.0537728981923093	0.0246391673738363	MMP9/PPP3CB/TWIST1	3	0.260869565217391
BP	GO:0033559	unsaturated fatty acid metabolic process	3/108	115/18903	0.0282377610957881	0.0537728981923093	0.0246391673738363	PLA2G10/PTGS2/IL1B	3	0.260869565217391
BP	GO:0035710	CD4-positive, alpha-beta T cell activation	3/108	115/18903	0.0282377610957881	0.0537728981923093	0.0246391673738363	FOXP3/IL6/CCL19	3	0.260869565217391
BP	GO:0021517	ventral spinal cord development	2/108	46/18903	0.0284317006742516	0.0539641160823789	0.0247267849238788	HOXD10/GATA2	2	0.434782608695652
BP	GO:0042088	T-helper 1 type immune response	2/108	46/18903	0.0284317006742516	0.0539641160823789	0.0247267849238788	CCL19/IL1B	2	0.434782608695652
BP	GO:0048701	embryonic cranial skeleton morphogenesis	2/108	46/18903	0.0284317006742516	0.0539641160823789	0.0247267849238788	TWIST1/SIX1	2	0.434782608695652
BP	GO:0055010	ventricular cardiac muscle tissue morphogenesis	2/108	46/18903	0.0284317006742516	0.0539641160823789	0.0247267849238788	PROX1/TGFB1	2	0.434782608695652
BP	GO:1901861	regulation of muscle tissue development	2/108	46/18903	0.0284317006742516	0.0539641160823789	0.0247267849238788	TGFB1/TWIST1	2	0.434782608695652
BP	GO:2000273	positive regulation of signaling receptor activity	2/108	46/18903	0.0284317006742516	0.0539641160823789	0.0247267849238788	NRP1/ITGB1	2	0.434782608695652
BP	GO:0098739	import across plasma membrane	4/108	202/18903	0.0287032816312135	0.0544497320587732	0.0249492980061939	PPP3CB/ITGB1/AKT1/TNF	4	0.198019801980198
BP	GO:0051701	biological process involved in interaction with host	4/108	203/18903	0.0291554690376389	0.055246980737989	0.0253146036584115	NRP1/EPHA2/CXCR4/ITGB1	4	0.197044334975369
BP	GO:1903828	negative regulation of protein localization	4/108	203/18903	0.0291554690376389	0.055246980737989	0.0253146036584115	ARF6/TGFB1/IRS1/IL1B	4	0.197044334975369
BP	GO:0000079	regulation of cyclin-dependent protein serine/threonine kinase activity	3/108	117/18903	0.0295099269446158	0.0557584609826519	0.0255489679530714	CDKN2A/PROX1/AKT1	3	0.256410256410256
BP	GO:0045582	positive regulation of T cell differentiation	3/108	117/18903	0.0295099269446158	0.0557584609826519	0.0255489679530714	FOXP3/SMARCA4/CCL19	3	0.256410256410256
BP	GO:0046632	alpha-beta T cell differentiation	3/108	117/18903	0.0295099269446158	0.0557584609826519	0.0255489679530714	FOXP3/IL6/CCL19	3	0.256410256410256
BP	GO:0002861	regulation of inflammatory response to antigenic stimulus	2/108	47/18903	0.0295864508449254	0.0557584609826519	0.0255489679530714	CCR7/TNF	2	0.425531914893617
BP	GO:0030521	androgen receptor signaling pathway	2/108	47/18903	0.0295864508449254	0.0557584609826519	0.0255489679530714	SMARCA4/NKX3-1	2	0.425531914893617
BP	GO:0031018	endocrine pancreas development	2/108	47/18903	0.0295864508449254	0.0557584609826519	0.0255489679530714	IL6/AKT1	2	0.425531914893617
BP	GO:0032369	negative regulation of lipid transport	2/108	47/18903	0.0295864508449254	0.0557584609826519	0.0255489679530714	PLA2G10/AKT1	2	0.425531914893617
BP	GO:0048286	lung alveolus development	2/108	47/18903	0.0295864508449254	0.0557584609826519	0.0255489679530714	FLT4/KDR	2	0.425531914893617
BP	GO:0050919	negative chemotaxis	2/108	47/18903	0.0295864508449254	0.0557584609826519	0.0255489679530714	SEMA7A/SEMA4D	2	0.425531914893617
BP	GO:0097028	dendritic cell differentiation	2/108	47/18903	0.0295864508449254	0.0557584609826519	0.0255489679530714	CCR7/CCL19	2	0.425531914893617
BP	GO:0002286	T cell activation involved in immune response	3/108	118/18903	0.030157247732081	0.0567723717501165	0.0260135498882379	FOXP3/IL6/CCL19	3	0.254237288135593
BP	GO:0007088	regulation of mitotic nuclear division	3/108	118/18903	0.030157247732081	0.0567723717501165	0.0260135498882379	IGF1/IL1B/TNF	3	0.254237288135593
BP	GO:0001754	eye photoreceptor cell differentiation	2/108	48/18903	0.0307596716717712	0.0575621531500929	0.0263754339740309	NTRK2/VEGFA	2	0.416666666666667
BP	GO:0003197	endocardial cushion development	2/108	48/18903	0.0307596716717712	0.0575621531500929	0.0263754339740309	ACVRL1/TWIST1	2	0.416666666666667
BP	GO:0007528	neuromuscular junction development	2/108	48/18903	0.0307596716717712	0.0575621531500929	0.0263754339740309	ERBB2/SIX1	2	0.416666666666667
BP	GO:0008038	neuron recognition	2/108	48/18903	0.0307596716717712	0.0575621531500929	0.0263754339740309	NRP1/CXCR4	2	0.416666666666667
BP	GO:0031057	negative regulation of histone modification	2/108	48/18903	0.0307596716717712	0.0575621531500929	0.0263754339740309	FOXP3/TWIST1	2	0.416666666666667
BP	GO:0032008	positive regulation of TOR signaling	2/108	48/18903	0.0307596716717712	0.0575621531500929	0.0263754339740309	LEP/PIK3CA	2	0.416666666666667
BP	GO:0035305	negative regulation of dephosphorylation	2/108	48/18903	0.0307596716717712	0.0575621531500929	0.0263754339740309	SEMA4D/TNF	2	0.416666666666667
BP	GO:0035850	epithelial cell differentiation involved in kidney development	2/108	48/18903	0.0307596716717712	0.0575621531500929	0.0263754339740309	MMP9/CD24	2	0.416666666666667
BP	GO:0045581	negative regulation of T cell differentiation	2/108	48/18903	0.0307596716717712	0.0575621531500929	0.0263754339740309	FOXP3/ERBB2	2	0.416666666666667
BP	GO:0045776	negative regulation of blood pressure	2/108	48/18903	0.0307596716717712	0.0575621531500929	0.0263754339740309	VEGFC/TNF	2	0.416666666666667
BP	GO:0071825	protein-lipid complex subunit organization	2/108	48/18903	0.0307596716717712	0.0575621531500929	0.0263754339740309	PLA2G10/PLA2G2A	2	0.416666666666667
BP	GO:0010927	cellular component assembly involved in morphogenesis	3/108	119/18903	0.0308120485969319	0.0576290179592535	0.0264060719585865	PROX1/CD9/ITGB1	3	0.252100840336134
BP	GO:0002285	lymphocyte activation involved in immune response	4/108	207/18903	0.0310065756048221	0.057930256202857	0.0265441017050398	FOXP3/IL6/TGFB1/CCL19	4	0.193236714975845
BP	GO:0048167	regulation of synaptic plasticity	4/108	207/18903	0.0310065756048221	0.057930256202857	0.0265441017050398	NTRK2/PPP3CB/SERPINE2/PTGS2	4	0.193236714975845
BP	GO:0007613	memory	3/108	120/18903	0.0314743198230306	0.0587091030319677	0.0269009754839537	PPP3CB/PTGS2/NGF	3	0.25
BP	GO:0090288	negative regulation of cellular response to growth factor stimulus	3/108	120/18903	0.0314743198230306	0.0587091030319677	0.0269009754839537	FGF2/SULF2/EMILIN1	3	0.25
BP	GO:1904029	regulation of cyclin-dependent protein kinase activity	3/108	120/18903	0.0314743198230306	0.0587091030319677	0.0269009754839537	CDKN2A/PROX1/AKT1	3	0.25
BP	GO:0008206	bile acid metabolic process	2/108	49/18903	0.0319511186377677	0.0594383518129778	0.0272351230448349	LEP/PROX1	2	0.408163265306122
BP	GO:0010862	positive regulation of pathway-restricted SMAD protein phosphorylation	2/108	49/18903	0.0319511186377677	0.0594383518129778	0.0272351230448349	ACVRL1/TGFB1	2	0.408163265306122
BP	GO:0035307	positive regulation of protein dephosphorylation	2/108	49/18903	0.0319511186377677	0.0594383518129778	0.0272351230448349	ITGA1/TGFB1	2	0.408163265306122
BP	GO:0042311	vasodilation	2/108	49/18903	0.0319511186377677	0.0594383518129778	0.0272351230448349	ITGA1/TNF	2	0.408163265306122
BP	GO:0043457	regulation of cellular respiration	2/108	49/18903	0.0319511186377677	0.0594383518129778	0.0272351230448349	PIK3CA/TNF	2	0.408163265306122
BP	GO:0090100	positive regulation of transmembrane receptor protein serine/threonine kinase signaling pathway	3/108	121/18903	0.0321440510329728	0.0597651475167304	0.0273848634217254	ACVRL1/KDR/TGFB1	3	0.247933884297521
BP	GO:0006476	protein deacetylation	3/108	122/18903	0.0328212311986683	0.0609260602733457	0.0279168028313211	FOXP3/TBL1XR1/VEGFA	3	0.245901639344262
BP	GO:0030278	regulation of ossification	3/108	122/18903	0.0328212311986683	0.0609260602733457	0.0279168028313211	S1PR1/TGFB1/TWIST1	3	0.245901639344262
BP	GO:0071901	negative regulation of protein serine/threonine kinase activity	3/108	122/18903	0.0328212311986683	0.0609260602733457	0.0279168028313211	CDKN2A/AKT1/IL1B	3	0.245901639344262
BP	GO:0006650	glycerophospholipid metabolic process	5/108	311/18903	0.033026627616471	0.0611623984670737	0.0280250948614674	FGF2/PIK3R1/PLA2G10/PIK3CA/PLA2G2A	5	0.160771704180064
BP	GO:0002066	columnar/cuboidal epithelial cell development	2/108	50/18903	0.0331605493710853	0.0611623984670737	0.0280250948614674	AKT1/GATA2	2	0.4
BP	GO:0007520	myoblast fusion	2/108	50/18903	0.0331605493710853	0.0611623984670737	0.0280250948614674	CD9/ITGB1	2	0.4
BP	GO:0021515	cell differentiation in spinal cord	2/108	50/18903	0.0331605493710853	0.0611623984670737	0.0280250948614674	HOXD10/GATA2	2	0.4
BP	GO:0021695	cerebellar cortex development	2/108	50/18903	0.0331605493710853	0.0611623984670737	0.0280250948614674	PROX1/SERPINE2	2	0.4
BP	GO:0042304	regulation of fatty acid biosynthetic process	2/108	50/18903	0.0331605493710853	0.0611623984670737	0.0280250948614674	PTGS2/IL1B	2	0.4
BP	GO:0042461	photoreceptor cell development	2/108	50/18903	0.0331605493710853	0.0611623984670737	0.0280250948614674	NTRK2/VEGFA	2	0.4
BP	GO:0045737	positive regulation of cyclin-dependent protein serine/threonine kinase activity	2/108	50/18903	0.0331605493710853	0.0611623984670737	0.0280250948614674	PROX1/AKT1	2	0.4
BP	GO:0060043	regulation of cardiac muscle cell proliferation	2/108	50/18903	0.0331605493710853	0.0611623984670737	0.0280250948614674	FGF2/MAPK11	2	0.4
BP	GO:0089718	amino acid import across plasma membrane	2/108	50/18903	0.0331605493710853	0.0611623984670737	0.0280250948614674	ITGB1/TNF	2	0.4
BP	GO:0090102	cochlea development	2/108	50/18903	0.0331605493710853	0.0611623984670737	0.0280250948614674	SIX1/GATA2	2	0.4
BP	GO:1902041	regulation of extrinsic apoptotic signaling pathway via death domain receptors	2/108	50/18903	0.0331605493710853	0.0611623984670737	0.0280250948614674	HGF/SERPINE1	2	0.4
BP	GO:0071482	cellular response to light stimulus	3/108	123/18903	0.0335058486518092	0.0617663727542936	0.0283018406581898	PIK3R1/MMP9/PTGS2	3	0.24390243902439
BP	GO:0030258	lipid modification	4/108	213/18903	0.0339108460100658	0.0624796960547353	0.0286286910378808	LEP/AKT1/TWIST1/IRS1	4	0.187793427230047
BP	GO:0034332	adherens junction organization	2/108	51/18903	0.0343877236289311	0.0632573322015725	0.0289850100725987	VEGFA/CDH1	2	0.392156862745098
BP	GO:0046580	negative regulation of Ras protein signal transduction	2/108	51/18903	0.0343877236289311	0.0632573322015725	0.0289850100725987	MET/ITGB1	2	0.392156862745098
BP	GO:0060425	lung morphogenesis	2/108	51/18903	0.0343877236289311	0.0632573322015725	0.0289850100725987	RSPO2/TNF	2	0.392156862745098
BP	GO:0045637	regulation of myeloid cell differentiation	4/108	214/18903	0.0344098328070144	0.0632643872426361	0.0289882427482297	PIK3R1/TGFB1/GATA2/TNF	4	0.186915887850467
BP	GO:0003014	renal system process	3/108	125/18903	0.0348973456081385	0.064126651006038	0.0293833388263855	MCAM/SULF2/ADM	3	0.24
BP	GO:0006690	icosanoid metabolic process	3/108	126/18903	0.0356041986662858	0.0653386547460656	0.029938688528785	PLA2G10/PTGS2/IL1B	3	0.238095238095238
BP	GO:0043244	regulation of protein-containing complex disassembly	3/108	126/18903	0.0356041986662858	0.0653386547460656	0.029938688528785	PIK3CA/NES/TNF	3	0.238095238095238
BP	GO:0002762	negative regulation of myeloid leukocyte differentiation	2/108	52/18903	0.0356324032815054	0.0653386547460656	0.029938688528785	PIK3R1/GATA2	2	0.384615384615385
BP	GO:0051496	positive regulation of stress fiber assembly	2/108	52/18903	0.0356324032815054	0.0653386547460656	0.029938688528785	NRP1/LPAR1	2	0.384615384615385
BP	GO:0072330	monocarboxylic acid biosynthetic process	4/108	218/18903	0.0364485922356148	0.0667999080570135	0.030608246356508	PROX1/PLA2G10/PTGS2/IL1B	4	0.18348623853211
BP	GO:0002204	somatic recombination of immunoglobulin genes involved in immune response	2/108	53/18903	0.0368943522960688	0.0674027692079104	0.0308844821053607	FOXP3/TGFB1	2	0.377358490566038
BP	GO:0002208	somatic diversification of immunoglobulins involved in immune response	2/108	53/18903	0.0368943522960688	0.0674027692079104	0.0308844821053607	FOXP3/TGFB1	2	0.377358490566038
BP	GO:0002639	positive regulation of immunoglobulin production	2/108	53/18903	0.0368943522960688	0.0674027692079104	0.0308844821053607	IL6/TGFB1	2	0.377358490566038
BP	GO:0019933	cAMP-mediated signaling	2/108	53/18903	0.0368943522960688	0.0674027692079104	0.0308844821053607	LPAR1/ADM	2	0.377358490566038
BP	GO:0045190	isotype switching	2/108	53/18903	0.0368943522960688	0.0674027692079104	0.0308844821053607	FOXP3/TGFB1	2	0.377358490566038
BP	GO:0046638	positive regulation of alpha-beta T cell differentiation	2/108	53/18903	0.0368943522960688	0.0674027692079104	0.0308844821053607	FOXP3/CCL19	2	0.377358490566038
BP	GO:0002377	immunoglobulin production	4/108	219/18903	0.0369689982652616	0.0675035189843542	0.0309306464500051	FOXP3/IL6/TGFB1/TNF	4	0.182648401826484
BP	GO:0009101	glycoprotein biosynthetic process	5/108	321/18903	0.0370623335772639	0.0676026337431442	0.0309760616166251	IGF1/VEGFB/CCL21/CCR7/CCL19	5	0.155763239875389
BP	GO:0009416	response to light stimulus	5/108	321/18903	0.0370623335772639	0.0676026337431442	0.0309760616166251	PIK3R1/MMP9/ITGB1/AKT1/PTGS2	5	0.155763239875389
BP	GO:0045931	positive regulation of mitotic cell cycle	3/108	129/18903	0.0377690049012731	0.068819102614846	0.0315334572776834	ADAMTS1/AKT1/NKX3-1	3	0.232558139534884
BP	GO:0051928	positive regulation of calcium ion transport	3/108	129/18903	0.0377690049012731	0.068819102614846	0.0315334572776834	CXCL12/PPP3CB/CCL5	3	0.232558139534884
BP	GO:0032330	regulation of chondrocyte differentiation	2/108	54/18903	0.0381733367211206	0.0694826980696739	0.0318375219650943	ACVRL1/LOXL2	2	0.37037037037037
BP	GO:1904031	positive regulation of cyclin-dependent protein kinase activity	2/108	54/18903	0.0381733367211206	0.0694826980696739	0.0318375219650943	PROX1/AKT1	2	0.37037037037037
BP	GO:0019079	viral genome replication	3/108	130/18903	0.0385053050230271	0.0699765700733437	0.0320638180244243	PROX1/CCL5/TNF	3	0.230769230769231
BP	GO:0031929	TOR signaling	3/108	130/18903	0.0385053050230271	0.0699765700733437	0.0320638180244243	LEP/PIK3CA/AKT1	3	0.230769230769231
BP	GO:0045621	positive regulation of lymphocyte differentiation	3/108	130/18903	0.0385053050230271	0.0699765700733437	0.0320638180244243	FOXP3/SMARCA4/CCL19	3	0.230769230769231
BP	GO:0003229	ventricular cardiac muscle tissue development	2/108	55/18903	0.0394691246706863	0.0715778468359958	0.0327975357055081	PROX1/TGFB1	2	0.363636363636364
BP	GO:0043525	positive regulation of neuron apoptotic process	2/108	55/18903	0.0394691246706863	0.0715778468359958	0.0327975357055081	ITGA1/TNF	2	0.363636363636364
BP	GO:0072132	mesenchyme morphogenesis	2/108	55/18903	0.0394691246706863	0.0715778468359958	0.0327975357055081	ACVRL1/TWIST1	2	0.363636363636364
BP	GO:1900087	positive regulation of G1/S transition of mitotic cell cycle	2/108	55/18903	0.0394691246706863	0.0715778468359958	0.0327975357055081	ADAMTS1/AKT1	2	0.363636363636364
BP	GO:0035601	protein deacylation	3/108	133/18903	0.0407580696164241	0.0738031916365754	0.0338172062988596	FOXP3/TBL1XR1/VEGFA	3	0.225563909774436
BP	GO:0002707	negative regulation of lymphocyte mediated immunity	2/108	56/18903	0.0407814863087143	0.0738031916365754	0.0338172062988596	FOXP3/PPP3CB	2	0.357142857142857
BP	GO:0043370	regulation of CD4-positive, alpha-beta T cell differentiation	2/108	56/18903	0.0407814863087143	0.0738031916365754	0.0338172062988596	FOXP3/CCL19	2	0.357142857142857
BP	GO:0060998	regulation of dendritic spine development	2/108	56/18903	0.0407814863087143	0.0738031916365754	0.0338172062988596	LPAR1/ARF6	2	0.357142857142857
BP	GO:0006661	phosphatidylinositol biosynthetic process	3/108	134/18903	0.0415235541705154	0.075106867574882	0.0344145609277714	FGF2/PIK3R1/PIK3CA	3	0.223880597014925
BP	GO:0002823	negative regulation of adaptive immune response based on somatic recombination of immune receptors built from immunoglobulin superfamily domains	2/108	57/18903	0.0421101938335808	0.0760884608830151	0.0348643347473939	FOXP3/PPP3CB	2	0.350877192982456
BP	GO:0070231	T cell apoptotic process	2/108	57/18903	0.0421101938335808	0.0760884608830151	0.0348643347473939	AKT1/CCL5	2	0.350877192982456
BP	GO:0071333	cellular response to glucose stimulus	3/108	136/18903	0.0430762571678954	0.0777934284377955	0.0356455643697765	SMARCA4/PPP3CB/PIK3CA	3	0.220588235294118
BP	GO:0001541	ovarian follicle development	2/108	58/18903	0.0434550214627026	0.0781919357088754	0.0358281635541595	KDR/VEGFA	2	0.344827586206897
BP	GO:0006826	iron ion transport	2/108	58/18903	0.0434550214627026	0.0781919357088754	0.0358281635541595	SCARA5/LCN2	2	0.344827586206897
BP	GO:0019369	arachidonic acid metabolic process	2/108	58/18903	0.0434550214627026	0.0781919357088754	0.0358281635541595	PLA2G10/PTGS2	2	0.344827586206897
BP	GO:0045620	negative regulation of lymphocyte differentiation	2/108	58/18903	0.0434550214627026	0.0781919357088754	0.0358281635541595	FOXP3/ERBB2	2	0.344827586206897
BP	GO:0048008	platelet-derived growth factor receptor signaling pathway	2/108	58/18903	0.0434550214627026	0.0781919357088754	0.0358281635541595	NRP1/VEGFA	2	0.344827586206897
BP	GO:0051058	negative regulation of small GTPase mediated signal transduction	2/108	58/18903	0.0434550214627026	0.0781919357088754	0.0358281635541595	MET/ITGB1	2	0.344827586206897
BP	GO:0061005	cell differentiation involved in kidney development	2/108	58/18903	0.0434550214627026	0.0781919357088754	0.0358281635541595	MMP9/CD24	2	0.344827586206897
BP	GO:0051604	protein maturation	5/108	336/18903	0.0436640639237022	0.0785272671708348	0.0359818150829907	FN1/CCBE1/ADAMTS3/SERPINE1/SERPINE2	5	0.148809523809524
BP	GO:0098732	macromolecule deacylation	3/108	137/18903	0.0438634369306744	0.0788448694984396	0.0361273429821972	FOXP3/TBL1XR1/VEGFA	3	0.218978102189781
BP	GO:0071331	cellular response to hexose stimulus	3/108	138/18903	0.0446578089165713	0.0802311024749194	0.0367625258991467	SMARCA4/PPP3CB/PIK3CA	3	0.217391304347826
BP	GO:0002763	positive regulation of myeloid leukocyte differentiation	2/108	59/18903	0.0448157454172557	0.0803896946292949	0.036835194078977	TGFB1/TNF	2	0.338983050847458
BP	GO:0043666	regulation of phosphoprotein phosphatase activity	2/108	59/18903	0.0448157454172557	0.0803896946292949	0.036835194078977	ITGA1/TNF	2	0.338983050847458
BP	GO:0061098	positive regulation of protein tyrosine kinase activity	2/108	59/18903	0.0448157454172557	0.0803896946292949	0.036835194078977	CD24/CCL5	2	0.338983050847458
BP	GO:0008277	regulation of G protein-coupled receptor signaling pathway	3/108	139/18903	0.0454593525496817	0.0814597714943053	0.0373255117643948	MET/ADM/CCL5	3	0.215827338129496
BP	GO:0050852	T cell receptor signaling pathway	3/108	139/18903	0.0454593525496817	0.0814597714943053	0.0373255117643948	FOXP3/CCR7/PIK3CA	3	0.215827338129496
BP	GO:1901987	regulation of cell cycle phase transition	6/108	453/18903	0.0455556542185851	0.0815901060034877	0.0373852320676384	ADAMTS1/SMARCA4/CDKN2A/PROX1/AKT1/NKX3-1	6	0.132450331125828
BP	GO:0072593	reactive oxygen species metabolic process	4/108	235/18903	0.0458797716921754	0.0821281125120534	0.0376317509062801	LEP/GRB2/TGFB1/TNF	4	0.170212765957447
BP	GO:0002768	immune response-regulating cell surface receptor signaling pathway	5/108	341/18903	0.0460124106358338	0.0823229796492282	0.0377210405702171	FOXP3/SOS1/CCR7/PIK3CA/CD24	5	0.146627565982405
BP	GO:0022029	telencephalon cell migration	2/108	60/18903	0.0461921439070013	0.0825592164202574	0.0378292861276804	CXCL12/CXCR4	2	0.333333333333333
BP	GO:1903670	regulation of sprouting angiogenesis	2/108	60/18903	0.0461921439070013	0.0825592164202574	0.0378292861276804	FGF2/VEGFA	2	0.333333333333333
BP	GO:0048813	dendrite morphogenesis	3/108	140/18903	0.0462680467756101	0.0826095811950295	0.0378523636659398	NRP1/ITGB1/SEMA4D	3	0.214285714285714
BP	GO:0060048	cardiac muscle contraction	3/108	140/18903	0.0462680467756101	0.0826095811950295	0.0378523636659398	VEGFB/CXCR4/PIK3CA	3	0.214285714285714
BP	GO:0034754	cellular hormone metabolic process	3/108	141/18903	0.0470838700700804	0.0840228650425867	0.0384999415060288	EGR1/CYP26B1/ADM	3	0.212765957446809
BP	GO:0016447	somatic recombination of immunoglobulin gene segments	2/108	61/18903	0.0475839971152169	0.0847406368379016	0.0388288302212648	FOXP3/TGFB1	2	0.327868852459016
BP	GO:0030865	cortical cytoskeleton organization	2/108	61/18903	0.0475839971152169	0.0847406368379016	0.0388288302212648	ARF6/TNF	2	0.327868852459016
BP	GO:0060135	maternal process involved in female pregnancy	2/108	61/18903	0.0475839971152169	0.0847406368379016	0.0388288302212648	AKT1/PTGS2	2	0.327868852459016
BP	GO:0090311	regulation of protein deacetylation	2/108	61/18903	0.0475839971152169	0.0847406368379016	0.0388288302212648	FOXP3/VEGFA	2	0.327868852459016
BP	GO:0014074	response to purine-containing compound	3/108	142/18903	0.0479068004474524	0.0852278227898665	0.0390520626788071	COL1A1/PTGS2/IL1B	3	0.211267605633803
BP	GO:1903900	regulation of viral life cycle	3/108	142/18903	0.0479068004474524	0.0852278227898665	0.0390520626788071	PROX1/CCL5/TNF	3	0.211267605633803
BP	GO:0070588	calcium ion transmembrane transport	5/108	345/18903	0.0479446198797482	0.0852512963655306	0.0390628184568867	FGF2/PPP3CB/CCL21/CCR7/CCL19	5	0.144927536231884
BP	GO:0030534	adult behavior	3/108	143/18903	0.0487368154691448	0.0865709877650997	0.0396675114968547	LEP/CXCL12/HOXD10	3	0.20979020979021
BP	GO:0055076	transition metal ion homeostasis	3/108	143/18903	0.0487368154691448	0.0865709877650997	0.0396675114968547	EPAS1/SCARA5/LCN2	3	0.20979020979021
BP	GO:0002820	negative regulation of adaptive immune response	2/108	62/18903	0.0489910871837311	0.0867555722915995	0.0397520895872299	FOXP3/PPP3CB	2	0.32258064516129
BP	GO:0006360	transcription by RNA polymerase I	2/108	62/18903	0.0489910871837311	0.0867555722915995	0.0397520895872299	SMARCA4/ERBB2	2	0.32258064516129
BP	GO:0032233	positive regulation of actin filament bundle assembly	2/108	62/18903	0.0489910871837311	0.0867555722915995	0.0397520895872299	NRP1/LPAR1	2	0.32258064516129
BP	GO:0043030	regulation of macrophage activation	2/108	62/18903	0.0489910871837311	0.0867555722915995	0.0397520895872299	IL6/PLA2G10	2	0.32258064516129
BP	GO:0043506	regulation of JUN kinase activity	2/108	62/18903	0.0489910871837311	0.0867555722915995	0.0397520895872299	CCL19/TNF	2	0.32258064516129
BP	GO:0060038	cardiac muscle cell proliferation	2/108	62/18903	0.0489910871837311	0.0867555722915995	0.0397520895872299	FGF2/MAPK11	2	0.32258064516129
CC	GO:0031091	platelet alpha granule	11/109	91/19869	2.65399246172548e-12	5.2814449988337e-10	4.52575556631082e-10	VEGFD/FN1/IGF1/CD9/VEGFB/TGFB1/VEGFC/HGF/VEGFA/SERPINE1/SERPINE2	11	1.20879120879121
CC	GO:0009897	external side of plasma membrane	19/109	462/19869	7.39467166818983e-12	7.35769830984888e-10	6.30493058024607e-10	MCAM/GHR/SCARA5/S1PR1/CXCL12/ITGA1/CLEC14A/KDR/SEMA7A/CD9/ITGA9/CXCR4/CCR7/ITGB1/CD24/ITGA6/SERPINE2/ITGA4/TNF	19	0.411255411255411
CC	GO:0031093	platelet alpha granule lumen	9/109	67/19869	1.05519413822223e-10	6.99945445020747e-09	5.99794562778953e-09	VEGFD/FN1/IGF1/VEGFB/TGFB1/VEGFC/HGF/VEGFA/SERPINE1	9	1.34328358208955
CC	GO:0062023	collagen-containing extracellular matrix	16/109	433/19869	1.83667201560259e-09	9.1374432776229e-08	7.83002280335842e-08	FN1/CXCL12/ADAMTS1/COL1A1/POSTN/CLEC14A/MMP9/SEMA7A/COL1A2/TGFB1/ADAMTS3/LAMC2/SERPINE1/SERPINE2/LOXL2/EMILIN1	16	0.369515011547344
CC	GO:0008305	integrin complex	6/109	31/19869	1.56221663729506e-08	6.21762221643434e-07	5.32798095245895e-07	ITGA1/ITGA9/ITGB1/ITGA6/EMILIN1/ITGA4	6	1.93548387096774
CC	GO:0034774	secretory granule lumen	12/109	322/19869	2.05790204325815e-07	6.03975800114786e-06	5.1755662321394e-06	VEGFD/FN1/IGF1/VEGFB/TGFB1/VEGFC/HGF/VEGFA/SERPINE1/HPSE/RETN/LCN2	12	0.372670807453416
CC	GO:0060205	cytoplasmic vesicle lumen	12/109	325/19869	2.27340790314367e-07	6.03975800114786e-06	5.1755662321394e-06	VEGFD/FN1/IGF1/VEGFB/TGFB1/VEGFC/HGF/VEGFA/SERPINE1/HPSE/RETN/LCN2	12	0.369230769230769
CC	GO:0031983	vesicle lumen	12/109	327/19869	2.42804341754688e-07	6.03975800114786e-06	5.1755662321394e-06	VEGFD/FN1/IGF1/VEGFB/TGFB1/VEGFC/HGF/VEGFA/SERPINE1/HPSE/RETN/LCN2	12	0.36697247706422
CC	GO:0098636	protein complex involved in cell adhesion	6/109	52/19869	3.93449457997563e-07	8.69960468239057e-06	7.45483183574331e-06	ITGA1/ITGA9/ITGB1/ITGA6/EMILIN1/ITGA4	6	1.15384615384615
CC	GO:0045121	membrane raft	11/109	326/19869	1.79944155453602e-06	3.35338209361973e-05	2.87356730582595e-05	S1PR1/TEK/ITGA1/KDR/ITGB1/CD24/PTGS2/IRS1/HPSE/CDH1/TNF	11	0.337423312883436
CC	GO:0098857	membrane microdomain	11/109	327/19869	1.85362829295563e-06	3.35338209361973e-05	2.87356730582595e-05	S1PR1/TEK/ITGA1/KDR/ITGB1/CD24/PTGS2/IRS1/HPSE/CDH1/TNF	11	0.336391437308868
CC	GO:0005925	focal adhesion	12/109	422/19869	3.52399445134862e-06	5.84395746515314e-05	5.00778158875857e-05	MCAM/TEK/ITGA1/NRP1/FGFR3/CD9/EPHA2/ITGB1/FLT1/ARF6/ITGA6/ITGA4	12	0.28436018957346
CC	GO:0030055	cell-substrate junction	12/109	432/19869	4.47649144801872e-06	6.85247537042865e-05	5.87199687918245e-05	MCAM/TEK/ITGA1/NRP1/FGFR3/CD9/EPHA2/ITGB1/FLT1/ARF6/ITGA6/ITGA4	12	0.277777777777778
CC	GO:0098802	plasma membrane signaling receptor complex	10/109	319/19869	1.03510948112457e-05	0.000147133419102707	0.000126081004467805	ITGA1/ACVRL1/IL6/ITGA9/ERBB2/ITGB1/ITGA6/IRS1/EMILIN1/ITGA4	10	0.313479623824451
CC	GO:0005581	collagen trimer	4/109	86/19869	0.00128819963460743	0.0170901151524586	0.0146447958460634	COL1A1/CCBE1/COL1A2/EMILIN1	4	0.465116279069767
CC	GO:0005583	fibrillar collagen trimer	2/109	12/19869	0.00189876656269532	0.02222673799861	0.0190464509694515	COL1A1/COL1A2	2	1.66666666666667
CC	GO:0098643	banded collagen fibril	2/109	12/19869	0.00189876656269532	0.02222673799861	0.0190464509694515	COL1A1/COL1A2	2	1.66666666666667
CC	GO:0005604	basement membrane	4/109	99/19869	0.00216267698789017	0.0239095955883413	0.0204885188326437	FN1/ADAMTS1/LAMC2/LOXL2	4	0.404040404040404
CC	GO:0035580	specific granule lumen	3/109	62/19869	0.00480223683011388	0.0502971120627717	0.0431004081151495	HPSE/RETN/LCN2	3	0.483870967741935
CC	GO:0030027	lamellipodium	5/109	203/19869	0.00525054161561066	0.0522428890753261	0.0447677758804698	EPHA2/ITGB1/PIK3CA/AKT1/CDH1	5	0.246305418719212
CC	GO:0098644	complex of collagen trimers	2/109	22/19869	0.00641227772036365	0.0607639650643984	0.0520696235939304	COL1A1/COL1A2	2	0.909090909090909
CC	GO:0044291	cell-cell contact zone	3/109	72/19869	0.00727959976231699	0.0648826602531727	0.0555990000582596	ITGB1/PIK3CA/TIAM1	3	0.416666666666667
CC	GO:0005788	endoplasmic reticulum lumen	6/109	312/19869	0.00749900093378378	0.0648826602531727	0.0555990000582596	FN1/COL1A1/IL6/COL1A2/IGFBP1/PTGS2	6	0.192307692307692
CC	GO:0019898	extrinsic component of membrane	6/109	316/19869	0.00795944094597695	0.0659970311770589	0.0565539225108889	PIK3R1/PIK3CA/AKT1/SERPINE2/TIAM1/CDH1	6	0.189873417721519
CC	GO:0031252	cell leading edge	7/109	421/19869	0.00855321424201528	0.0680835853664416	0.0583419245139568	EPHA2/CXCR4/ITGB1/PIK3CA/ARF6/AKT1/CDH1	7	0.166270783847981
CC	GO:0098978	glutamatergic synapse	6/109	324/19869	0.00894100666766142	0.0684330894947932	0.0586414202494393	ELAVL1/NRP1/PPP3CB/ITGB1/ARF6/CDH1	6	0.185185185185185
CC	GO:0005901	caveola	3/109	82/19869	0.0103919842847771	0.0765927730618758	0.065633584956487	PTGS2/IRS1/CDH1	3	0.365853658536585
CC	GO:0005942	phosphatidylinositol 3-kinase complex	2/109	29/19869	0.0109924973828101	0.0781252492564007	0.0669467885720016	PIK3R1/PIK3CA	2	0.689655172413793
CC	GO:0019897	extrinsic component of plasma membrane	4/109	172/19869	0.0149356092205255	0.102489180513261	0.0878246349809487	AKT1/SERPINE2/TIAM1/CDH1	4	0.232558139534884
CC	GO:0045178	basal part of cell	5/109	272/19869	0.0171021226379725	0.113444080165217	0.0972120655211065	TEK/ITGA1/MET/ITGA9/ERBB2	5	0.183823529411765
CC	GO:0043025	neuronal cell body	7/109	497/19869	0.0196961676466945	0.126436689086845	0.108345642063311	GHR/ITGA1/ACVRL1/SOS1/LPAR1/ITGA4/TNF	7	0.140845070422535
CC	GO:0044853	plasma membrane raft	3/109	113/19869	0.0243316303619735	0.151312326313523	0.129661977586833	PTGS2/IRS1/CDH1	3	0.265486725663717
CC	GO:0005769	early endosome	6/109	414/19869	0.0265919356359544	0.160357430047119	0.137412873142731	NRP1/KDR/NTRK2/ERBB2/CXCR4/ARF6	6	0.144927536231884
CC	GO:0043209	myelin sheath	2/109	47/19869	0.0274597710897655	0.160720424907745	0.137723929304706	ERBB2/ITGB1	2	0.425531914893617
CC	GO:0014704	intercalated disc	2/109	50/19869	0.0307901561685219	0.175064030786739	0.150015196971445	ITGB1/PIK3CA	2	0.4
CC	GO:0098858	actin-based cell projection	4/109	223/19869	0.034497610374019	0.190695124011939	0.163409733350617	TEK/ITGB1/ARF6/TGFB1	4	0.179372197309417
CC	GO:0032154	cleavage furrow	2/109	54/19869	0.0354648122991657	0.19074317966308	0.163450913014647	ITGB1/ARF6	2	0.37037037037037
MF	GO:0048018	receptor ligand activity	23/108	491/18432	8.21213027826947e-15	1.68170024453849e-12	1.19766736192597e-12	VEGFD/LEP/CXCL12/IGF1/FGF2/TYMP/IL6/SEMA7A/VEGFB/IL24/CCL21/TGFB1/VEGFC/ADM/HGF/SEMA4D/VEGFA/CCL5/RETN/CCL19/IL1B/NGF/TNF	23	0.468431771894094
MF	GO:0030546	signaling receptor activator activity	23/108	498/18432	1.11003316471188e-14	1.68170024453849e-12	1.19766736192597e-12	VEGFD/LEP/CXCL12/IGF1/FGF2/TYMP/IL6/SEMA7A/VEGFB/IL24/CCL21/TGFB1/VEGFC/ADM/HGF/SEMA4D/VEGFA/CCL5/RETN/CCL19/IL1B/NGF/TNF	23	0.461847389558233
MF	GO:0005178	integrin binding	15/108	156/18432	1.84101681353937e-14	1.85942698167477e-12	1.32424016412481e-12	FN1/CXCL12/IGF1/FGF2/ITGA1/KDR/SEMA7A/CD9/ITGA9/ITGB1/ITGA6/LGALS8/EMILIN1/ITGA4/IL1B	15	0.961538461538462
MF	GO:0019199	transmembrane receptor protein kinase activity	12/108	79/18432	3.23106200442282e-14	2.21145631500055e-12	1.57494717587324e-12	TEK/NRP1/ACVRL1/FLT4/TIE1/KDR/FGFR3/NTRK2/EPHA2/MET/ERBB2/FLT1	12	1.51898734177215
MF	GO:0019838	growth factor binding	14/108	132/18432	3.64926784653556e-14	2.21145631500055e-12	1.57494717587324e-12	GHR/COL1A1/NRP1/ACVRL1/FLT4/KDR/FGFR3/NTRK2/COL1A2/EPHA2/ERBB2/IGFBP1/FLT1/ITGA6	14	1.06060606060606
MF	GO:0004714	transmembrane receptor protein tyrosine kinase activity	11/108	60/18432	4.47571846433569e-14	2.26023782448952e-12	1.6096882196295e-12	TEK/NRP1/FLT4/TIE1/KDR/FGFR3/NTRK2/EPHA2/MET/ERBB2/FLT1	11	1.83333333333333
MF	GO:0005126	cytokine receptor binding	16/108	273/18432	5.20040044538844e-12	2.25103047850385e-10	1.60313096436787e-10	VEGFD/CXCL12/PIK3R1/IL6/VEGFB/GRB2/CCL21/TGFB1/VEGFC/NES/VEGFA/CCL5/CCL19/IL1B/NGF/TNF	16	0.586080586080586
[truncated: 91 more rows]

## Sheet: KEGG
Table S3. Full results of GO and KEGG enrichment analyses for 109 candidate genes (2,090 terms).
	ID	Description	GeneRatio	BgRatio	pvalue	p.adjust	qvalue	geneID	Count	richFactor
1	hsa04151	PI3K-Akt signaling pathway	35/86	362/8541	3.78941804131746e-26	7.80620116511396e-24	2.75231415632531e-24	VEGFD/GHR/FN1/TEK/COL1A1/IGF1/FGF2/ITGA1/FLT4/PIK3R1/IL6/KDR/FGFR3/NTRK2/VEGFB/COL1A2/SOS1/EPHA2/MET/ITGA9/GRB2/ERBB2/ITGB1/FLT1/PIK3CA/LPAR1/VEGFC/AKT1/HGF/LAMC2/ITGA6/VEGFA/IRS1/ITGA4/NGF	35	0.966850828729282
2	hsa04510	Focal adhesion	26/86	203/8541	2.48952265577271e-22	2.56420833544589e-20	9.04089806570089e-21	VEGFD/FN1/COL1A1/IGF1/ITGA1/FLT4/PIK3R1/KDR/JUN/VEGFB/COL1A2/SOS1/MET/ITGA9/GRB2/ERBB2/ITGB1/FLT1/PIK3CA/VEGFC/AKT1/HGF/LAMC2/ITGA6/VEGFA/ITGA4	26	1.2807881773399
3	hsa05205	Proteoglycans in cancer	24/86	204/8541	1.04200404517935e-19	7.15509444356489e-18	2.52274663569738e-18	FN1/COL1A1/IGF1/FGF2/PIK3R1/MMP9/KDR/COL1A2/SOS1/MET/GRB2/ERBB2/ITGB1/PIK3CA/TGFB1/AKT1/HGF/TWIST1/HOXD10/VEGFA/TIAM1/HPSE/MAPK11/TNF	24	1.17647058823529
4	hsa04014	Ras signaling pathway	25/86	238/8541	2.60913337428929e-19	1.34370368775898e-17	4.73763691647266e-18	VEGFD/TEK/IGF1/FGF2/FLT4/PIK3R1/KDR/FGFR3/NTRK2/VEGFB/SOS1/EPHA2/MET/GRB2/PLA2G10/FLT1/PIK3CA/ARF6/VEGFC/AKT1/HGF/VEGFA/TIAM1/PLA2G2A/NGF	25	1.05042016806723
5	hsa04010	MAPK signaling pathway	27/86	300/8541	4.2117622723254e-19	1.73524605619807e-17	6.11813887979901e-18	VEGFD/TEK/IGF1/FGF2/FLT4/KDR/FGFR3/NTRK2/JUN/VEGFB/SOS1/EPHA2/MET/PPP3CB/GRB2/ERBB2/RPS6KA1/FLT1/TGFB1/VEGFC/AKT1/HGF/VEGFA/MAPK11/IL1B/NGF/TNF	27	0.9
6	hsa04933	AGE-RAGE signaling pathway in diabetic complications	18/86	101/8541	3.3716629097973e-18	1.15760426569707e-16	4.08148668028094e-17	VEGFD/FN1/EGR1/COL1A1/PIK3R1/IL6/JUN/VEGFB/COL1A2/PIK3CA/TGFB1/VEGFC/AKT1/VEGFA/SERPINE1/MAPK11/IL1B/TNF	18	1.78217821782178
7	hsa04015	Rap1 signaling pathway	23/86	212/8541	4.379162261412e-18	1.28872489407267e-16	4.54379242161546e-17	VEGFD/TEK/IGF1/FGF2/FLT4/PIK3R1/KDR/FGFR3/VEGFB/EPHA2/MET/ITGB1/FLT1/PIK3CA/LPAR1/VEGFC/AKT1/HGF/VEGFA/TIAM1/MAPK11/CDH1/NGF	23	1.08490566037736
8	hsa01521	EGFR tyrosine kinase inhibitor resistance	14/86	80/8541	3.25031204768074e-14	8.3695535227779e-13	2.95094120118383e-13	IGF1/FGF2/PIK3R1/IL6/KDR/FGFR3/SOS1/MET/GRB2/ERBB2/PIK3CA/AKT1/HGF/VEGFA	14	1.75
9	hsa04926	Relaxin signaling pathway	15/86	130/8541	2.09990223463574e-12	4.8064428926107e-11	1.69465794374112e-11	VEGFD/COL1A1/PIK3R1/MMP9/JUN/VEGFB/COL1A2/SOS1/GRB2/PIK3CA/TGFB1/VEGFC/AKT1/VEGFA/MAPK11	15	1.15384615384615
10	hsa05163	Human cytomegalovirus infection	17/86	226/8541	6.61005886291288e-11	1.36167212576005e-09	4.80099012148409e-10	CXCL12/CDKN2A/PIK3R1/IL6/SOS1/PPP3CB/GRB2/CXCR4/PIK3CA/AKT1/VEGFA/PTGS2/CCL5/MAPK11/IL1B/PTGER1/TNF	17	0.752212389380531
11	hsa05211	Renal cell carcinoma	11/86	70/8541	7.47239705026248e-11	1.39937617486734e-09	4.93392723892929e-10	EPAS1/PIK3R1/JUN/SOS1/MET/GRB2/PIK3CA/TGFB1/AKT1/HGF/VEGFA	11	1.57142857142857
12	hsa04668	TNF signaling pathway	13/86	119/8541	1.42005904483022e-10	2.43776802695854e-09	8.5950942187092e-10	VEGFD/PIK3R1/MMP9/IL6/JUN/PIK3CA/VEGFC/AKT1/PTGS2/CCL5/MAPK11/IL1B/TNF	13	1.09243697478992
13	hsa04020	Calcium signaling pathway	17/86	254/8541	4.14596338763823e-10	6.56975736810366e-09	2.31636820847804e-09	VEGFD/FGF2/FLT4/KDR/FGFR3/NTRK2/VEGFB/MET/PPP3CB/ERBB2/CXCR4/FLT1/VEGFC/HGF/VEGFA/NGF/PTGER1	17	0.669291338582677
14	hsa04066	HIF-1 signaling pathway	12/86	110/8541	7.8162137987742e-10	1.15010003039106e-08	4.05502821139413e-09	EPAS1/TEK/PFKFB3/IGF1/PIK3R1/IL6/ERBB2/FLT1/PIK3CA/AKT1/VEGFA/SERPINE1	12	1.09090909090909
15	hsa05135	Yersinia infection	13/86	138/8541	9.20926031943038e-10	1.20428235296514e-08	4.24606450457816e-09	FN1/PIK3R1/IL6/JUN/RPS6KA1/ITGB1/PIK3CA/ARF6/AKT1/MAPK11/ITGA4/IL1B/TNF	13	0.942028985507246
16	hsa04810	Regulation of actin cytoskeleton	16/86	232/8541	9.35364934341855e-10	1.20428235296514e-08	4.24606450457816e-09	FN1/CXCL12/FGF2/ITGA1/PIK3R1/FGFR3/SOS1/ITGA9/CXCR4/ITGB1/PIK3CA/LPAR1/AKT1/ITGA6/TIAM1/ITGA4	16	0.689655172413793
17	hsa01522	Endocrine resistance	11/86	99/8541	3.43949917971841e-09	4.16786371189407e-08	1.46950738947722e-08	IGF1/CDKN2A/PIK3R1/MMP9/JUN/SOS1/GRB2/ERBB2/PIK3CA/AKT1/MAPK11	11	1.11111111111111
18	hsa05142	Chagas disease	11/86	103/8541	5.26833781023766e-09	6.0293199383831e-08	2.12582051992046e-08	PIK3R1/IL6/JUN/PIK3CA/TGFB1/AKT1/SERPINE1/CCL5/MAPK11/IL1B/TNF	11	1.06796116504854
19	hsa05165	Human papillomavirus infection	17/86	333/8541	2.53992289680041e-08	2.75011296040252e-07	9.69636148532316e-08	FN1/COL1A1/ITGA1/PIK3R1/COL1A2/SOS1/ITGA9/GRB2/ITGB1/PIK3CA/AKT1/LAMC2/ITGA6/VEGFA/PTGS2/ITGA4/TNF	17	0.510510510510511
20	hsa04722	Neurotrophin signaling pathway	11/86	120/8541	2.67001258291507e-08	2.75011296040252e-07	9.69636148532316e-08	PIK3R1/NTRK2/JUN/SOS1/GRB2/RPS6KA1/PIK3CA/AKT1/IRS1/MAPK11/NGF	11	0.916666666666667
21	hsa05323	Rheumatoid arthritis	10/86	95/8541	3.16200875120586e-08	3.10178001308765e-07	1.09362708688323e-07	TEK/CXCL12/IL6/JUN/FLT1/TGFB1/VEGFA/CCL5/IL1B/TNF	10	1.05263157894737
22	hsa05218	Melanoma	9/86	73/8541	3.98973562262795e-08	3.57341538374504e-07	1.25991651240883e-07	IGF1/FGF2/CDKN2A/PIK3R1/MET/PIK3CA/AKT1/HGF/CDH1	9	1.23287671232877
23	hsa05223	Non-small cell lung cancer	9/86	73/8541	3.98973562262795e-08	3.57341538374504e-07	1.25991651240883e-07	CDKN2A/PIK3R1/SOS1/MET/GRB2/ERBB2/PIK3CA/AKT1/HGF	9	1.23287671232877
24	hsa05146	Amoebiasis	10/86	103/8541	6.91577124395043e-08	5.93603698439078e-07	2.09293077119552e-07	FN1/COL1A1/PIK3R1/IL6/COL1A2/PIK3CA/TGFB1/LAMC2/IL1B/TNF	10	0.970873786407767
25	hsa04068	FoxO signaling pathway	11/86	133/8541	7.80835016129369e-08	6.434080532906e-07	2.2685312047548e-07	S1PR1/IGF1/PIK3R1/IL6/SOS1/GRB2/PIK3CA/TGFB1/AKT1/IRS1/MAPK11	11	0.827067669172932
26	hsa04625	C-type lectin receptor signaling pathway	10/86	105/8541	8.32004427418136e-08	6.59203507877446e-07	2.32422289440694e-07	PIK3R1/IL6/JUN/PPP3CB/PIK3CA/AKT1/PTGS2/MAPK11/IL1B/TNF	10	0.952380952380952
27	hsa04370	VEGF signaling pathway	8/86	60/8541	1.26883331159705e-07	9.68072822922194e-07	3.41323580897452e-07	PIK3R1/KDR/PPP3CB/PIK3CA/AKT1/VEGFA/PTGS2/MAPK11	8	1.33333333333333
28	hsa05219	Bladder cancer	7/86	41/8541	1.39626961564323e-07	1.02725550293752e-06	3.62190238644296e-07	TYMP/CDKN2A/MMP9/FGFR3/ERBB2/VEGFA/CDH1	7	1.70731707317073
29	hsa04060	Cytokine-cytokine receptor interaction	15/86	298/8541	2.26317209990451e-07	1.57400409606307e-06	5.5496312022663e-07	GHR/LEP/CXCL12/ACVRL1/IL6/IL24/CCL21/CXCR4/CCR7/TGFB1/CCL5/CCL19/IL1B/NGF/TNF	15	0.503355704697987
30	hsa04512	ECM-receptor interaction	9/86	89/8541	2.29223897484912e-07	1.57400409606307e-06	5.5496312022663e-07	FN1/COL1A1/ITGA1/COL1A2/ITGA9/ITGB1/LAMC2/ITGA6/ITGA4	9	1.01123595505618
31	hsa05226	Gastric cancer	11/86	150/8541	2.68233004885211e-07	1.78245158085011e-06	6.28457634535809e-07	FGF2/PIK3R1/SOS1/MET/GRB2/ERBB2/PIK3CA/TGFB1/AKT1/HGF/CDH1	11	0.733333333333333
32	hsa04657	IL-17 signaling pathway	9/86	95/8541	4.03467706405052e-07	2.59732335998252e-06	9.15765517827256e-07	ELAVL1/MMP9/IL6/JUN/PTGS2/MAPK11/IL1B/LCN2/TNF	9	0.947368421052632
33	hsa04932	Non-alcoholic fatty liver disease	11/86	157/8541	4.25680619237884e-07	2.65727901706073e-06	9.36904712198214e-07	LEP/PIK3R1/IL6/JUN/PIK3CA/TGFB1/AKT1/IRS1/MAPK11/IL1B/TNF	11	0.700636942675159
34	hsa04062	Chemokine signaling pathway	12/86	193/8541	4.46106404389464e-07	2.70287997953616e-06	9.52982721451177e-07	CXCL12/PIK3R1/SOS1/GRB2/CCL21/CXCR4/CCR7/PIK3CA/AKT1/TIAM1/CCL5/CCL19	12	0.621761658031088
35	hsa05215	Prostate cancer	9/86	98/8541	5.27282667627268e-07	3.10343512946335e-06	1.09421064860997e-06	IGF1/PIK3R1/MMP9/SOS1/GRB2/ERBB2/PIK3CA/AKT1/NKX3-1	9	0.918367346938776
36	hsa05410	Hypertrophic cardiomyopathy	9/86	99/8541	5.75292395037981e-07	3.29195092716178e-06	1.16067763911172e-06	IGF1/ITGA1/IL6/ITGA9/ITGB1/TGFB1/ITGA6/ITGA4/TNF	9	0.909090909090909
37	hsa05161	Hepatitis B	11/86	163/8541	6.20696644938421e-07	3.399251328032e-06	1.19850966598982e-06	PIK3R1/MMP9/IL6/JUN/SOS1/GRB2/PIK3CA/TGFB1/AKT1/MAPK11/TNF	11	0.674846625766871
38	hsa04061	Viral protein interaction with cytokine and cytokine receptor	9/86	100/8541	6.2704636148163e-07	3.399251328032e-06	1.19850966598982e-06	CXCL12/IL6/IL24/CCL21/CXCR4/CCR7/CCL5/CCL19/TNF	9	0.9
39	hsa05140	Leishmaniasis	8/86	79/8541	1.10800474315974e-06	5.85253787412582e-06	2.06349061479142e-06	JUN/ITGB1/TGFB1/PTGS2/MAPK11/ITGA4/IL1B/TNF	8	1.0126582278481
40	hsa04620	Toll-like receptor signaling pathway	9/86	109/8541	1.30576328460895e-06	6.66912340584437e-06	2.35140273379285e-06	PIK3R1/IL6/JUN/PIK3CA/AKT1/CCL5/MAPK11/IL1B/TNF	9	0.825688073394495
41	hsa05418	Fluid shear stress and atherosclerosis	10/86	141/8541	1.32734980407582e-06	6.66912340584437e-06	2.35140273379285e-06	PIK3R1/MMP9/KDR/JUN/PIK3CA/AKT1/VEGFA/MAPK11/IL1B/TNF	10	0.709219858156028
42	hsa04380	Osteoclast differentiation	10/86	143/8541	1.51039542032077e-06	7.40812991871615e-06	2.61196200506599e-06	PIK3R1/JUN/PPP3CB/GRB2/PIK3CA/TGFB1/AKT1/MAPK11/IL1B/TNF	10	0.699300699300699
43	hsa05213	Endometrial cancer	7/86	59/8541	1.83056700484877e-06	8.76969309299644e-06	3.09202260304933e-06	PIK3R1/SOS1/GRB2/ERBB2/PIK3CA/AKT1/CDH1	7	1.1864406779661
44	hsa04360	Axon guidance	11/86	184/8541	2.06491835787969e-06	9.46444712293841e-06	3.33697931263541e-06	CXCL12/NRP1/PIK3R1/SEMA7A/EPHA2/MET/PPP3CB/CXCR4/ITGB1/PIK3CA/SEMA4D	11	0.597826086956522
45	hsa05224	Breast cancer	10/86	148/8541	2.06747631326324e-06	9.46444712293841e-06	3.33697931263541e-06	IGF1/FGF2/FLT4/PIK3R1/JUN/SOS1/GRB2/ERBB2/PIK3CA/AKT1	10	0.675675675675676
46	hsa04660	T cell receptor signaling pathway	9/86	122/8541	3.35906989107324e-06	1.47227318630019e-05	5.19094787198329e-06	PIK3R1/JUN/SOS1/PPP3CB/GRB2/PIK3CA/AKT1/MAPK11/TNF	9	0.737704918032787
47	hsa04935	Growth hormone synthesis, secretion and action	9/86	122/8541	3.35906989107324e-06	1.47227318630019e-05	5.19094787198329e-06	GHR/IGF1/PIK3R1/SOS1/GRB2/PIK3CA/AKT1/IRS1/MAPK11	9	0.737704918032787
48	hsa05222	Small cell lung cancer	8/86	93/8541	3.85853715108771e-06	1.65595552734181e-05	5.83857595230376e-06	FN1/PIK3R1/ITGB1/PIK3CA/AKT1/LAMC2/ITGA6/PTGS2	8	0.860215053763441
49	hsa04664	Fc epsilon RI signaling pathway	7/86	69/8541	5.33783154866589e-06	2.24406795719423e-05	7.91214558234041e-06	PIK3R1/SOS1/GRB2/PIK3CA/AKT1/MAPK11/TNF	7	1.01449275362319
50	hsa04640	Hematopoietic cell lineage	8/86	100/8541	6.65923944028132e-06	2.7436066493959e-05	9.67342150272445e-06	ITGA1/IL6/CD9/CD24/ITGA6/ITGA4/IL1B/TNF	8	0.8
51	hsa05225	Hepatocellular carcinoma	10/86	170/8541	7.19543431380296e-06	2.90639111498708e-05	1.02473677534036e-05	SMARCA4/CDKN2A/PIK3R1/SOS1/MET/GRB2/PIK3CA/TGFB1/AKT1/HGF	10	0.588235294117647
52	hsa05414	Dilated cardiomyopathy	8/86	105/8541	9.57903668631565e-06	3.7152894745676e-05	1.30993854749701e-05	IGF1/ITGA1/ITGA9/ITGB1/TGFB1/ITGA6/ITGA4/TNF	8	0.761904761904762
53	hsa05417	Lipid and atherosclerosis	11/86	216/8541	9.7149891846185e-06	3.7152894745676e-05	1.30993854749701e-05	PIK3R1/MMP9/IL6/JUN/PPP3CB/PIK3CA/AKT1/CCL5/MAPK11/IL1B/TNF	11	0.509259259259259
54	hsa05144	Malaria	6/86	50/8541	9.73910833139078e-06	3.7152894745676e-05	1.30993854749701e-05	IL6/MET/TGFB1/HGF/IL1B/TNF	6	1.2
55	hsa05214	Glioma	7/86	76/8541	1.02188439050029e-05	3.82742153532835e-05	1.34947412334009e-05	IGF1/CDKN2A/PIK3R1/SOS1/GRB2/PIK3CA/AKT1	7	0.921052631578947
56	hsa05212	Pancreatic cancer	7/86	77/8541	1.11498916361462e-05	4.02960995973002e-05	1.4207618151322e-05	CDKN2A/PIK3R1/ERBB2/PIK3CA/TGFB1/AKT1/VEGFA	7	0.909090909090909
57	hsa05220	Chronic myeloid leukemia	7/86	77/8541	1.11498916361462e-05	4.02960995973002e-05	1.4207618151322e-05	CDKN2A/PIK3R1/SOS1/GRB2/PIK3CA/TGFB1/AKT1	7	0.909090909090909
58	hsa05206	MicroRNAs in cancer	13/86	312/8541	1.26435659757396e-05	4.4906458465558e-05	1.58331406955723e-05	CDKN2A/PIK3R1/MMP9/FGFR3/SOS1/MET/GRB2/ERBB2/PIK3CA/HOXD10/VEGFA/PTGS2/IRS1	13	0.416666666666667
59	hsa05166	Human T-cell leukemia virus 1 infection	11/86	224/8541	1.37053948424072e-05	4.78527345345065e-05	1.68719401271382e-05	EGR1/CDKN2A/NRP1/PIK3R1/IL6/JUN/PPP3CB/PIK3CA/TGFB1/AKT1/TNF	11	0.491071428571429
60	hsa04670	Leukocyte transendothelial migration	8/86	116/8541	1.99539234513918e-05	6.85084705164452e-05	2.41547494411585e-05	CXCL12/PIK3R1/MMP9/CXCR4/ITGB1/PIK3CA/MAPK11/ITGA4	8	0.689655172413793
61	hsa04012	ErbB signaling pathway	7/86	86/8541	2.3158795360408e-05	7.82083908892468e-05	2.75747520253348e-05	PIK3R1/JUN/SOS1/GRB2/ERBB2/PIK3CA/AKT1	7	0.813953488372093
62	hsa05210	Colorectal cancer	7/86	87/8541	2.49817574785346e-05	8.18760062276086e-05	2.88678816029892e-05	PIK3R1/JUN/SOS1/GRB2/PIK3CA/TGFB1/AKT1	7	0.804597701149425
63	hsa05167	Kaposi sarcoma-associated herpesvirus infection	10/86	196/8541	2.50397494773755e-05	8.18760062276086e-05	2.88678816029892e-05	FGF2/PIK3R1/IL6/JUN/PPP3CB/PIK3CA/AKT1/VEGFA/PTGS2/MAPK11	10	0.510204081632653
64	hsa04218	Cellular senescence	9/86	157/8541	2.61624199432014e-05	8.42102891921795e-05	2.96909042118569e-05	CDKN2A/PIK3R1/IL6/PPP3CB/PIK3CA/TGFB1/AKT1/SERPINE1/MAPK11	9	0.573248407643312
65	hsa04150	mTOR signaling pathway	9/86	158/8541	2.75169158470595e-05	8.72074563768348e-05	3.0747646857443e-05	IGF1/PIK3R1/SOS1/GRB2/RPS6KA1/PIK3CA/AKT1/IRS1/TNF	9	0.569620253164557
66	hsa04152	AMPK signaling pathway	8/86	122/8541	2.87994139278362e-05	8.98890798353675e-05	3.16931349445087e-05	LEP/PFKFB3/ELAVL1/IGF1/PIK3R1/PIK3CA/AKT1/IRS1	8	0.655737704918033
67	hsa04662	B cell receptor signaling pathway	7/86	91/8541	3.3499318425767e-05	0.000102997904413552	3.63150506108079e-05	PIK3R1/JUN/SOS1/PPP3CB/GRB2/PIK3CA/AKT1	7	0.769230769230769
68	hsa04630	JAK-STAT signaling pathway	9/86	168/8541	4.46768836719401e-05	0.000135344677006172	4.77198912285429e-05	GHR/LEP/PIK3R1/IL6/SOS1/IL24/GRB2/PIK3CA/AKT1	9	0.535714285714286
69	hsa05321	Inflammatory bowel disease	6/86	66/8541	4.89674625191836e-05	0.000146192714187708	5.15446973886143e-05	FOXP3/IL6/JUN/TGFB1/IL1B/TNF	6	0.909090909090909
70	hsa04917	Prolactin signaling pathway	6/86	71/8541	7.41495591901006e-05	0.000215138157650151	7.58535149609628e-05	PIK3R1/SOS1/GRB2/PIK3CA/AKT1/MAPK11	6	0.845070422535211
71	hsa05230	Central carbon metabolism in cancer	6/86	71/8541	7.41495591901006e-05	0.000215138157650151	7.58535149609628e-05	PIK3R1/FGFR3/MET/ERBB2/PIK3CA/AKT1	6	0.845070422535211
72	hsa05208	Chemical carcinogenesis - reactive oxygen species	10/86	227/8541	8.71491420346592e-05	0.000249343378599164	8.7913608192858e-05	PIK3R1/JUN/SOS1/MET/GRB2/PIK3CA/AKT1/HGF/VEGFA/MAPK11	10	0.440528634361234
73	hsa04550	Signaling pathways regulating pluripotency of stem cells	8/86	144/8541	9.40519457634993e-05	0.000265406860647683	9.35772784092495e-05	IGF1/FGF2/PIK3R1/FGFR3/GRB2/PIK3CA/AKT1/MAPK11	8	0.555555555555556
74	hsa04659	Th17 cell differentiation	7/86	109/8541	0.000106581810310114	0.000292744705651781	0.0001032160689319	FOXP3/IL6/JUN/PPP3CB/TGFB1/MAPK11/IL1B	7	0.642201834862385
75	hsa04931	Insulin resistance	7/86	109/8541	0.000106581810310114	0.000292744705651781	0.0001032160689319	PIK3R1/IL6/RPS6KA1/PIK3CA/AKT1/IRS1/TNF	7	0.642201834862385
76	hsa05100	Bacterial invasion of epithelial cells	6/86	78/8541	0.000125717971707788	0.000334022130233226	0.000117769683117489	FN1/PIK3R1/MET/ITGB1/PIK3CA/CDH1	6	0.769230769230769
77	hsa05133	Pertussis	6/86	78/8541	0.000125717971707788	0.000334022130233226	0.000117769683117489	IL6/JUN/ITGB1/MAPK11/IL1B/TNF	6	0.769230769230769
78	hsa05145	Toxoplasmosis	7/86	112/8541	0.000126474398826173	0.000334022130233226	0.000117769683117489	ITGB1/TGFB1/AKT1/LAMC2/ITGA6/MAPK11/TNF	7	0.625
79	hsa04672	Intestinal immune network for IgA production	5/86	50/8541	0.00013659637454626	0.000356188014639614	0.000125584941288367	CXCL12/IL6/CXCR4/TGFB1/ITGA4	5	1
80	hsa05131	Shigellosis	10/86	250/8541	0.000193117055550153	0.000497276418041644	0.000175329958328428	PIK3R1/JUN/ITGB1/PIK3CA/ARF6/AKT1/CCL5/MAPK11/IL1B/TNF	10	0.4
81	hsa05415	Diabetic cardiomyopathy	9/86	205/8541	0.000206113462715713	0.000524189794067123	0.000184819089374714	COL1A1/PIK3R1/MMP9/COL1A2/PIK3CA/TGFB1/AKT1/IRS1/MAPK11	9	0.439024390243902
82	hsa04611	Platelet activation	7/86	126/8541	0.000263167398466298	0.000661127854683626	0.000233100776561933	COL1A1/PIK3R1/COL1A2/ITGB1/PIK3CA/AKT1/MAPK11	7	0.555555555555556
83	hsa05235	PD-L1 expression and PD-1 checkpoint pathway in cancer	6/86	90/8541	0.000276792854526717	0.000686979855813297	0.000242215687537647	PIK3R1/JUN/PPP3CB/PIK3CA/AKT1/MAPK11	6	0.666666666666667
84	hsa05207	Chemical carcinogenesis - receptor activation	9/86	215/8541	0.000294055425338732	0.000721135924044986	0.000254258450480859	FGF2/PIK3R1/JUN/SOS1/GRB2/RPS6KA1/PIK3CA/AKT1/VEGFA	9	0.418604651162791
85	hsa04923	Regulation of lipolysis in adipocytes	5/86	59/8541	0.000300650956581673	0.000728636435950879	0.000256902984571337	PIK3R1/PIK3CA/AKT1/PTGS2/IRS1	5	0.847457627118644
86	hsa04213	Longevity regulating pathway - multiple species	5/86	62/8541	0.000379530099730588	0.000909106983075594	0.000320533376761451	IGF1/PIK3R1/PIK3CA/AKT1/IRS1	5	0.806451612903226
87	hsa04750	Inflammatory mediator regulation of TRP channels	6/86	99/8541	0.000463506394550058	0.00108502633269673	0.000382559105549689	IGF1/PIK3R1/PIK3CA/MAPK11/IL1B/NGF	6	0.606060606060606
88	hsa05231	Choline metabolism in cancer	6/86	99/8541	0.000463506394550058	0.00108502633269673	0.000382559105549689	PIK3R1/JUN/SOS1/GRB2/PIK3CA/AKT1	6	0.606060606060606
89	hsa04915	Estrogen signaling pathway	7/86	139/8541	0.000478699250306773	0.00110800051194601	0.000390659352704522	PIK3R1/MMP9/JUN/SOS1/GRB2/PIK3CA/AKT1	7	0.503597122302158
90	hsa04960	Aldosterone-regulated sodium reabsorption	4/86	38/8541	0.000544785021588079	0.00124695238274605	0.000439651070053538	IGF1/PIK3R1/PIK3CA/IRS1	4	1.05263157894737
91	hsa05221	Acute myeloid leukemia	5/86	68/8541	0.000583178893571963	0.00132016320962444	0.000465463778559461	PIK3R1/SOS1/GRB2/PIK3CA/AKT1	5	0.735294117647059
92	hsa04064	NF-kappa B signaling pathway	6/86	105/8541	0.000634495243365223	0.00142071761014387	0.000500917297393597	CXCL12/CCL21/PTGS2/CCL19/IL1B/TNF	6	0.571428571428571
93	hsa04072	Phospholipase D signaling pathway	7/86	149/8541	0.00072558893441623	0.00160721849988971	0.000566673870681606	PIK3R1/SOS1/GRB2/PIK3CA/LPAR1/ARF6/AKT1	7	0.469798657718121
94	hsa04914	Progesterone-mediated oocyte maturation	6/86	111/8541	0.000850868182950751	0.00186466857114739	0.000657445740465866	IGF1/PIK3R1/RPS6KA1/PIK3CA/AKT1/MAPK11	6	0.540540540540541
95	hsa01524	Platinum drug resistance	5/86	75/8541	0.000913862770857869	0.00198163927154443	0.000698687326196044	CDKN2A/PIK3R1/ERBB2/PIK3CA/AKT1	5	0.666666666666667
96	hsa05130	Pathogenic Escherichia coli infection	8/86	203/8541	0.000961904587538974	0.00206408692742738	0.000727756760309092	IL6/JUN/ITGB1/LPAR1/ARF6/MAPK11/IL1B/TNF	8	0.394088669950739
97	hsa04930	Type II diabetes mellitus	4/86	47/8541	0.00122889028448196	0.00260980823302355	0.000920167440360884	PIK3R1/PIK3CA/IRS1/TNF	4	0.851063829787234
98	hsa05170	Human immunodeficiency virus 1 infection	8/86	213/8541	0.00131149743587987	0.00275682114072708	0.000972001321973269	PIK3R1/JUN/PPP3CB/CXCR4/PIK3CA/AKT1/MAPK11/TNF	8	0.375586854460094
99	hsa04071	Sphingolipid signaling pathway	6/86	122/8541	0.00139115404967223	0.00289472458820686	0.00102062338572444	S1PR1/PIK3R1/PIK3CA/AKT1/MAPK11/TNF	6	0.491803278688525
100	hsa05412	Arrhythmogenic right ventricular cardiomyopathy	5/86	86/8541	0.00169141851958183	0.00348432215033857	0.00122850397738049	ITGA1/ITGA9/ITGB1/ITGA6/ITGA4	5	0.581395348837209
101	hsa05164	Influenza A	7/86	173/8541	0.00173484334983323	0.00353839336698658	0.00124756843291811	PIK3R1/IL6/PIK3CA/AKT1/CCL5/IL1B/TNF	7	0.404624277456647
102	hsa05020	Prion disease	9/86	278/8541	0.00184632078474491	0.00372884393781815	0.00131471758666046	EGR1/PIK3R1/IL6/PPP3CB/PIK3CA/CCL5/MAPK11/IL1B/TNF	9	0.323741007194245
103	hsa04211	Longevity regulating pathway	5/86	90/8541	0.00206857819098782	0.00413715638197565	0.00145868058434502	IGF1/PIK3R1/PIK3CA/AKT1/IRS1	5	0.555555555555556
104	hsa04650	Natural killer cell mediated cytotoxicity	6/86	134/8541	0.00224480278580402	0.00441608751461722	0.00155702625706994	PIK3R1/SOS1/PPP3CB/GRB2/PIK3CA/TNF	6	0.447761194029851
105	hsa04820	Cytoskeleton in muscle cells	8/86	232/8541	0.00225091839337285	0.00441608751461722	0.00155702625706994	FN1/COL1A1/ITGA1/COL1A2/ITGA9/ITGB1/ITGA6/ITGA4	8	0.344827586206897
106	hsa05152	Tuberculosis	7/86	182/8541	0.00231515262731491	0.00445720973109225	0.00157152514790682	IL6/PPP3CB/TGFB1/AKT1/MAPK11/IL1B/TNF	7	0.384615384615385
107	hsa05168	Herpes simplex virus 1 infection	7/86	182/8541	0.00231515262731491	0.00445720973109225	0.00157152514790682	PIK3R1/IL6/PIK3CA/AKT1/CCL5/IL1B/TNF	7	0.384615384615385
108	hsa04912	GnRH signaling pathway	5/86	93/8541	0.00238930898040331	0.00455738564780632	0.00160684522073907	EGR1/JUN/SOS1/GRB2/MAPK11	5	0.537634408602151
109	hsa04210	Apoptosis	6/86	136/8541	0.00241875320321711	0.00457122165011674	0.00161172352507948	PIK3R1/JUN/PIK3CA/AKT1/NGF/TNF	6	0.441176470588235
110	hsa04910	Insulin signaling pathway	6/86	138/8541	0.00260268336625796	0.00487411612226491	0.00171851820355789	PIK3R1/SOS1/GRB2/PIK3CA/AKT1/IRS1	6	0.434782608695652
111	hsa05171	Coronavirus disease - COVID-19	8/86	238/8541	0.00263789295846964	0.00489554909409682	0.00172607505106122	NRP1/PIK3R1/IL6/JUN/PIK3CA/MAPK11/IL1B/TNF	8	0.336134453781513
112	hsa05162	Measles	6/86	139/8541	0.00269850219855651	0.00496331654377358	0.00174996853101879	PIK3R1/IL6/JUN/PIK3CA/AKT1/IL1B	6	0.431654676258993
113	hsa01523	Antifolate resistance	3/86	30/8541	0.00328848387441858	0.00599493520469228	0.00211369713399983	IL6/IL1B/TNF	3	1
114	hsa05132	Salmonella infection	8/86	251/8541	0.00365508334126443	0.00660479972193397	0.00232872345842332	IL6/JUN/PIK3CA/ARF6/AKT1/MAPK11/IL1B/TNF	8	0.318725099601594
115	hsa05202	Transcriptional misregulation in cancer	7/86	198/8541	0.00370578508859949	0.00663818894131735	0.00234049584543126	IGF1/LMO2/MMP9/IL6/MET/FLT1/SIX1	7	0.353535353535354
116	hsa05169	Epstein-Barr virus infection	7/86	204/8541	0.00436553978412545	0.00775259651318831	0.0027334142024016	PIK3R1/IL6/JUN/PIK3CA/AKT1/MAPK11/TNF	7	0.343137254901961
117	hsa05160	Hepatitis C	6/86	159/8541	0.00522774401009696	0.00920440398358953	0.00324529317765803	PIK3R1/SOS1/GRB2/PIK3CA/AKT1/TNF	6	0.377358490566038
118	hsa04920	Adipocytokine signaling pathway	4/86	70/8541	0.00530261126706991	0.00925710102556272	0.00326387312602876	LEP/AKT1/IRS1/TNF	4	0.571428571428571
119	hsa05120	Epithelial cell signaling in Helicobacter pylori infection	4/86	71/8541	0.00557671272953215	0.00965380522927414	0.00340374328472108	JUN/MET/CCL5/MAPK11	4	0.563380281690141
120	hsa05143	African trypanosomiasis	3/86	37/8541	0.00598301181828164	0.0102708369547168	0.00362129662685468	IL6/IL1B/TNF	3	0.810810810810811
121	hsa05332	Graft-versus-host disease	3/86	45/8541	0.0103146385909202	0.0175604590886741	0.00619147510024788	IL6/IL1B/TNF	3	0.666666666666667
122	hsa04621	NOD-like receptor signaling pathway	6/86	189/8541	0.0118020092262732	0.0199279827919039	0.00702621774471831	IL6/JUN/CCL5/MAPK11/IL1B/TNF	6	0.317460317460317
123	hsa04936	Alcoholic liver disease	5/86	144/8541	0.0148567730357134	0.0248820751655038	0.00877293401338662	IL6/AKT1/MAPK11/IL1B/TNF	5	0.347222222222222
124	hsa04973	Carbohydrate digestion and absorption	3/86	52/8541	0.015277009956632	0.0253795487989209	0.00894833350600685	PIK3R1/PIK3CA/AKT1	3	0.576923076923077
125	hsa05010	Alzheimer disease	9/86	391/8541	0.0164490627436844	0.0271080554015919	0.00955777119422505	PIK3R1/IL6/PPP3CB/PIK3CA/AKT1/PTGS2/IRS1/IL1B/TNF	9	0.230179028132992
126	hsa04666	Fc gamma R-mediated phagocytosis	4/86	99/8541	0.0174858619186583	0.0285879964701874	0.0100795695270462	PIK3R1/PIK3CA/ARF6/AKT1	4	0.404040404040404
127	hsa05134	Legionellosis	3/86	56/8541	0.0186208178160905	0.0302038462213752	0.0106492866084563	IL6/IL1B/TNF	3	0.535714285714286
128	hsa03271	Virion - Rotavirus	1/86	2/8541	0.0200379379584409	0.0322485564018658	0.0113702115060232	ITGB1	1	5
129	hsa04148	Efferocytosis	5/86	157/8541	0.0208163467286996	0.0332416079543575	0.0117203420993902	S1PR1/TGFB1/CD24/PTGS2/MAPK11	5	0.318471337579618
130	hsa04514	Cell adhesion molecules	5/86	158/8541	0.0213309126196938	0.0338012923050532	0.01191767587659	ITGA9/ITGB1/ITGA6/ITGA4/CDH1	5	0.316455696202532
131	hsa04081	Hormone signaling	6/86	219/8541	0.0227877084664209	0.0358341064433795	0.0126344064618967	GHR/LEP/IGF1/PIK3R1/PIK3CA/IRS1	6	0.273972602739726
132	hsa00590	Arachidonic acid metabolism	3/86	63/8541	0.0253746858031447	0.0395998884503622	0.0139621476907256	PLA2G10/PTGS2/PLA2G2A	3	0.476190476190476
133	hsa04929	GnRH secretion	3/86	65/8541	0.0275157312739101	0.0426183506949284	0.0150263985587637	PIK3R1/PIK3CA/AKT1	3	0.461538461538462
134	hsa00592	alpha-Linolenic acid metabolism	2/86	26/8541	0.0278512575845989	0.0428161124061745	0.0150961254779052	PLA2G10/PLA2G2A	2	0.769230769230769
135	hsa00591	Linoleic acid metabolism	2/86	30/8541	0.0363279774714306	0.0554338026601089	0.019544876768255	PLA2G10/PLA2G2A	2	0.666666666666667
136	hsa04115	p53 signaling pathway	3/86	75/8541	0.0396181540524716	0.0600098509912437	0.0211583020868463	IGF1/CDKN2A/SERPINE1	3	0.4
137	hsa03260	Virion - Human immunodeficiency virus	1/86	5/8541	0.0493530121005373	0.0742096386329247	0.026164870034092	CXCR4	1	2
