# Supplementary material for: Exploration of prognostic genes associated with lymphangiogenesis in breast cancer based on transcriptomics and experimental verification
Source: PeerJ. 2025 Aug 27;13:e19890. doi: 10.7717/peerj.19890 (PMC12398285; doi:10.7717/peerj.19890)
Supplement: Supplemental Information 4 [file peerj-13-19890-s004.xlsx]

## Sheet: Supplementary Table 4
Table S4. Proportional hazards assumption test results for 109 candidate genes (98 met PH assumption).
	chisq	df	p
COL1A1	0.579004672768925	1	0.446702722076977
COL1A2	0.652282568351565	1	0.419297782078231
FN1	0.430596826904067	1	0.511696239625651
POSTN	1.89742718720411	1	0.168366581563127
CD24	0.585487524470629	1	0.444169389247951
ERBB2	0.444646758879958	1	0.504888147611661
CDH1	2.54468384439331	1	0.110666061032336
ITGB1	0.860693359715855	1	0.353544732534707
CD9	0.126542825553352	1	0.722043836419736
EGR1	0.36799022371228	1	0.544101811599627
JUN	0.875126994576448	1	0.349539839166879
GRB2	3.51499226102863	1	0.0608159409181826
SULF2	0.71957885515311	1	0.396282087038244
TBL1XR1	0.697042133566657	1	0.403779368653972
ARF6	2.07779040201081	1	0.149456388783323
EPAS1	0.95730768660747	1	0.327866137632133
SMARCA4	0.0220772492773205	1	0.881881781573592
PIK3R1	1.10608181661277	1	0.292935263310563
PFKFB3	0.253539193431199	1	0.61459397419768
CXCL12	1.77261576550913	1	0.183058688489476
MCAM	0.147039404598711	1	0.701380817840088
ITGA6	0.566767400612146	1	0.451546332212107
AKT1	0.0286327920121483	1	0.865629679608562
JPT1	3.24668438148285	1	0.071568093357942
NRP1	0.71970623500426	1	0.396240286295851
NTRK2	0.10078117261489	1	0.750894202694722
MMP9	2.10672694703235	1	0.146652693187304
ELAVL1	1.01077883301118	1	0.314716327017969
NES	0.0140304324981634	1	0.905711009992537
CXCR4	0.0578817731640313	1	0.809875760638987
LAMC2	0.424740978460961	1	0.514580818115125
EMILIN1	0.0346893447397418	1	0.852248121375498
TYMP	0.299884057981257	1	0.583955115124054
VEGFB	0.0981811597551965	1	0.75402332820892
SERPINE1	0.107535034829547	1	0.74296810647809
PTPN14	0.30363734307358	1	0.581611067871323
SOS1	0.940383823175377	1	0.332179151706687
ADAMTS1	0.0124210894982614	1	0.911259558973135
PPP3CB	1.56891711666904	1	0.210364344321526
LOXL2	0.377282040051809	1	0.539061443904722
ITGA1	1.61933637211432	1	0.203184345840131
RPS6KA1	0.690365255339208	1	0.406040171623364
FLT1	0.415276438527156	1	0.519303469855492
TGFB1	0.00873199279676697	1	0.925549936760126
SERPINE2	0.109492576384686	1	0.740722571425537
KDR	1.4668477208464	1	0.225843711653988
CCL5	1.60192863700974	1	0.205630108777205
PIK3CA	1.5334030240636	1	0.21560242915749
MET	1.54371555425626	1	0.214065598582618
CEBPD	2.91425581243256	1	0.0877999073200259
SEMA4D	2.42065899991043	1	0.119744546697101
LEP	2.93026044439313	1	0.0869334672299643
FGFR3	3.32958151157444	1	0.06804418583082
S1PR1	1.81140987007124	1	0.178339195224433
TIE1	0.0337331641547044	1	0.854275558788662
TIAM1	0.0784812887624008	1	0.779366168572391
ACVRL1	0.23353901346196	1	0.628912029598399
LCN2	2.27045544473245	1	0.131861146436207
ITGA9	2.05061115321506	1	0.152145105054739
PLA2G2A	0.0348842336089212	1	0.85183844916084
CLEC14A	0.261132234352533	1	0.609343359628956
CCL19	0.730678768078013	1	0.392663261794085
ITGA4	0.770827244565925	1	0.379961259212196
EPHA2	1.89665414282418	1	0.168453305509887
NKX3_1	0.207791111254639	1	0.648504244617191
CCL21	0.266688007528408	1	0.605562187850913
CDKN2A	2.47751623900439	1	0.115484494357813
FLT4	0.0526765284922693	1	0.81846969065935
LMO2	1.27226942732679	1	0.259341368264401
FGF2	0.596152763291755	1	0.440049697528071
SCARA5	1.42252440354437	1	0.232988345168647
LYVE1	0.0336854958824656	1	0.854377404924525
MAPK11	1.30030535028821	1	0.254157455399922
VEGFC	1.00605867942838e-05	1	0.997469239838243
SEMA7A	0.922097184563648	1	0.336924921948953
TWIST1	1.80680856529797	1	0.178891547168797
SOX18	0.0629058240449866	1	0.801960750908074
PTGS2	0.122114048299033	1	0.726752848767994
CCR7	1.17002140842274	1	0.279396841698929
CYP26B1	0.006406650624478	1	0.936204205378767
HGF	1.85591549157279	1	0.17309695219354
HPSE	0.182212090883109	1	0.669479056508829
IL1B	0.321635501733445	1	0.570626422154635
FOXP3	0.0518941994112458	1	0.819799406973437
VEGFD	1.58748490033588	1	0.207685839729913
PROX1	0.214452966751379	1	0.643299378807509
IL6	1.63180093544235e-05	1	0.996776909728988
IGF1	0.965095304162789	1	0.325906449575658
ADAMTS3	1.24198558951429	1	0.265088725188448
TNF	0.0227869580491491	1	0.880012399992138
ZIC2	0.481839655337546	1	0.487590207940996
CCBE1	1.51602567821172	1	0.218221918723397
HOXD10	1.63784146944037	1	0.200621884543705
IGFBP1	0.434739580747468	1	0.509672425240828
NGF	0.813417956647328	1	0.367111656416656
RETN	0.556721915869479	1	0.455584056014271
PTGER1	1.12417613951221	1	0.289020996897504
RSPO2	0.0454217568505136	1	0.831230396370764
