# Supplementary material for: Exploration of prognostic genes associated with lymphangiogenesis in breast cancer based on transcriptomics and experimental verification
Source: PeerJ. 2025 Aug 27;13:e19890. doi: 10.7717/peerj.19890 (PMC12398285; doi:10.7717/peerj.19890)
Supplement: Supplemental Information 5 [file peerj-13-19890-s005.xlsx]

## Sheet: Supplementary Table 5
Table S5. Univariate Cox regression results of clinical factors and risk score (p<0.05).
phenotype	PH.p
Age	0.934262439141084
Gender	0.305815881616996
Stage	0.00264046402243121
T.stage	0.0251484502056989
N.stage	0.159638063225613
M.stage	0.647028359122029
riskScore	0.0835921052790671
