# Supplementary material for: Exploration of prognostic genes associated with lymphangiogenesis in breast cancer based on transcriptomics and experimental verification
Source: PeerJ. 2025 Aug 27;13:e19890. doi: 10.7717/peerj.19890 (PMC12398285; doi:10.7717/peerj.19890)
Supplement: Supplemental Information 6 [file peerj-13-19890-s006.xlsx]

## Sheet: Supplementary Table 6
Table S6. Multivariate Cox regression results of independent prognostic factors (riskScore, age, N/M stage).
	p.value	HR	HR.95L	HR.95H	Indicator
riskScore	2.13037219391552e-05	2.24999509926938	1.54808965231307	3.27014520068146	riskScore
Age	0.00180927546460469	1.78996433250945	1.24166036622188	2.5803934786169	Age
N0(Reference)	NA	1	1	1	N0(Reference)
N1	0.0116246029427564	1.69331398864243	1.12478440698962	2.54921053876113	N1
N2	0.00028463938402496	2.78321813587132	1.60120671892561	4.83779083630171	N2
N3	0.0101990804356618	2.73310493115853	1.26916877925722	5.8856337209105	N3
M1 vs M0	0.00782053637881949	2.79886153919773	1.31099	5.97536742394977	M1 vs M0
