# Supplementary material for: Exploration of prognostic genes associated with lymphangiogenesis in breast cancer based on transcriptomics and experimental verification
Source: PeerJ. 2025 Aug 27;13:e19890. doi: 10.7717/peerj.19890 (PMC12398285; doi:10.7717/peerj.19890)
Supplement: Supplemental Information 7 [file peerj-13-19890-s007.xlsx]

## Sheet: Supplementary Table 7
Table S7. Correlation analysis between risk score and IC50 values of 26 sensitive drugs (|cor|>0.3, p<0.05).
	drug	riskScore	r	p	change
5	AG.014699	riskScore	0.332365279408057	2.27354486346133e-29	Positive correlation
8	AMG.706	riskScore	0.383417627888063	2.75223281363333e-39	Positive correlation
12	AUY922	riskScore	0.378650806970942	2.77667662818604e-38	Positive correlation
14	AZ628	riskScore	0.436439836269892	1.24255571974348e-51	Positive correlation
16	AZD.2281	riskScore	0.347763487745042	3.58710907806811e-32	Positive correlation
17	AZD6244	riskScore	0.492368853708834	2.88279042337196e-67	Positive correlation
29	BMS.509744	riskScore	0.377794934337768	4.18795768876755e-38	Positive correlation
30	BMS.536924	riskScore	0.359713795920144	1.86048278237138e-34	Positive correlation
40	CEP.701	riskScore	0.38822282967331	2.57507967008266e-40	Positive correlation
44	CI.1040	riskScore	0.419467823921126	1.95038668121164e-47	Positive correlation
50	DMOG	riskScore	0.30852185752285	2.45678819996088e-25	Positive correlation
61	GDC.0449	riskScore	0.392767571011554	2.64119398508716e-41	Positive correlation
63	Gefitinib	riskScore	0.324168778407342	6.08765842516248e-28	Positive correlation
81	Metformin	riskScore	0.328914242076539	9.18679943553127e-29	Positive correlation
82	Methotrexate	riskScore	0.339934205168162	9.98082693533488e-31	Positive correlation
91	Nutlin.3a	riskScore	0.331802991211167	2.85790033345964e-29	Positive correlation
100	PD.0325901	riskScore	0.413014279727285	6.66216473579425e-46	Positive correlation
101	PD.0332991	riskScore	0.402705747572686	1.60140057329287e-43	Positive correlation
103	PF.02341066	riskScore	0.408244528900987	8.62257194550018e-45	Positive correlation
104	PF.4708671	riskScore	-0.325367	3.78896626884637e-28	Negative correlation
108	Pyrimethamine	riskScore	0.324745998778011	4.84540755386013e-28	Positive correlation
110	Rapamycin	riskScore	0.312541193604489	5.44188195002067e-26	Positive correlation
111	RDEA119	riskScore	0.324886935888264	4.58243195128092e-28	Positive correlation
113	Roscovitine	riskScore	0.441984976725828	4.68672005503396e-53	Positive correlation
116	SB590885	riskScore	0.310772574184759	1.05936885241773e-25	Positive correlation
124	Tipifarnib	riskScore	0.39455410903982	1.06847614025058e-41	Positive correlation
