# Supplementary material for: Exploration of prognostic genes associated with lymphangiogenesis in breast cancer based on transcriptomics and experimental verification
Source: PeerJ. 2025 Aug 27;13:e19890. doi: 10.7717/peerj.19890 (PMC12398285; doi:10.7717/peerj.19890)
Supplement: Supplemental Information 12 [file peerj-13-19890-s012.xls]

## Sheet: Sheet1
ITEM TO CHECK	IMPORTANCE	CHECKLIST
EXPERIMENTAL DESIGN
Definition of experimental and control groups	E	MCF-10A，MCF-10A，MCF-10A，MCF-7，MCF-7，MCF-7，ZR-75-1，ZR-75-1，ZR-75-1，SK-BR-3，SK-BR-3，SK-BR-3（line 233）
Number within each group	E	MCF-10A，MCF-10A，MCF-10A，MCF-7，MCF-7，MCF-7，ZR-75-1，ZR-75-1，ZR-75-1，SK-BR-3，SK-BR-3，SK-BR-3（line 233）
Assay carried out by core lab or investigator's lab?	D
Acknowledgement of authors' contributions	D
SAMPLE
Description	E	Cell lines were obtained from Haixing Biotechnology Co., Ltd. (Suzhou, China)（line 239）
Volume/mass of sample processed	D	70-90 per cent density（To avoid excessive length, it was not described in the manuscript.）
Microdissection or macrodissection	E	NONE
Processing procedure	E	Add 1ml of TRIzol reagent, homogenise well and leave on ice for 10 minutes to fully lyse the cells.（To avoid excessive length, it was not described in the manuscript.）
If frozen - how and how quickly?	E	NONE
If fixed - with what, how quickly?	E	NONE
Sample storage conditions and duration (especially for FFPE samples)	E	NONE
NUCLEIC ACID EXTRACTION
Procedure and/or instrumentation	E	S1000™ Thermal Cycler general PCR instrument; CFX Connect real-time quantitative fluorescence PCR instrument; Chemiluminescence imaging system ChemiScope6100; H1 16KR benchtop refrigerated high-speed centrifuge; SC-3610 low-speed centrifuge; Palm instantaneous centrifuge (for reagents or mixing); Vortex oscillator SCL-VS. Electrophoresis Instrument (164-5050).（To avoid excessive length, it was no…
Name of kit and details of any modifications	E	NONE
Source of additional reagents used	D
Details of DNase or RNAse treatment	E	NONE
Contamination assessment (DNA or RNA)	E	Concentration was measured by Nano drop and RNA purity/concentration was recorded to calculate the amount of sample for subsequent reverse transcription steps.（To avoid excessive length, it was not described in the manuscript.）
Nucleic acid quantification	E	Concentration was measured by Nano drop and RNA purity/concentration was recorded to calculate the amount of sample for subsequent reverse transcription steps.（To avoid excessive length, it was not described in the manuscript.）
Instrument and method	E	S1000™ Thermal Cycler general PCR instrument; CFX Connect real-time quantitative fluorescence PCR instrument; Chemiluminescence imaging system ChemiScope6100; H1 16KR benchtop refrigerated high-speed centrifuge; SC-3610 low-speed centrifuge; Palm instantaneous centrifuge (for reagents or mixing); Vortex oscillator SCL-VS. Electrophoresis Instrument (164-5050).（To avoid excessive length, it was no…
Purity (A260/A280)	D
Yield	D
RNA integrity method/instrument	E	The RNA integrity was assessed using the NanoDrop spectrophotometer by measuring the A260/A280 ratio, which gives an indication of RNA purity. However, no specific RNA integrity number (RIN) or gel electrophoresis data were provided to assess RNA integrity further.（To avoid excessive length, it was not described in the manuscript.）
RIN/RQI or Cq of 3' and 5' transcripts	E	NONE
Electrophoresis traces	D
Inhibition testing (Cq dilutions, spike or other)	E	The quality of the RNA was primarily assessed through concentration and purity metrics (A260/A280 ratio),and Amplification solubility curve（To avoid excessive length, it was not described in the manuscript.）
REVERSE TRANSCRIPTION
Complete reaction conditions	E	25℃ 5min 55℃ 15min 85℃ 5min 4℃ hold（To avoid excessive length, it was not described in the manuscript.）
Amount of RNA and reaction volume	E	5×gDNA digester Mix 3ul 4×Hifair® Ⅲ SuperMix plus 5ul Total RNA 2ug Nuclease-Free Water Add to 20ul（To avoid excessive length, it was not described in the manuscript.）
Priming oligonucleotide (if using GSP) and concentration	E	the reaction involved adding 1 uL of primer.（To avoid excessive length, it was not described in the manuscript.）
Reverse transcriptase and concentration	E	4×Hifair® Ⅲ SuperMix plus 5ul（To avoid excessive length, it was not described in the manuscript.）
Temperature and time	E	25℃ 5min 55℃ 15min 85℃ 5min 4℃ hold（To avoid excessive length, it was not described in the manuscript.）
Manufacturer of reagents and catalogue numbers	D
Cqs with and without RT	D*
Storage conditions of cDNA	D
qPCR TARGET INFORMATION
If multiplex, efficiency and LOD of each assay.	E	NONE
Sequence accession number	E	NONE
Location of amplicon	D
Amplicon length	E	NONE
In silico specificity screen (BLAST, etc)	E	NONE
Pseudogenes, retropseudogenes or other homologs?	D
Sequence alignment	D
Secondary structure analysis of amplicon	D
Location of each primer by exon or intron (if applicable)	E	NONE
What splice variants are targeted?	E	NONE
qPCR OLIGONUCLEOTIDES
Primer sequences	E	CCL19 F GAAGACTGCTGCCTGTCTGT CCL19 R GCAGTCTCTGGATGATGCGT CD24 F CGAGAGATAACCCTGCCCGA CD24 R GTCTAGCAGGATGCTGGGTG ZIC2 F TCCCTTCCGGAGTCTTTGAA ZIC2 R ACGTGGGCATGGAGATTAGC CEBPD F GGAGAGACTCAGCAACGACC CEBPD R TCTTTGCGCTCCTATGTCCC H-GAPDH F ATGGGCAGCCGTTAGGAAAG H-GAPDH R AGGAAAAGCATCACCCGGAG（line 242）
RTPrimerDB Identification Number	D
Probe sequences	D**
Location and identity of any modifications	E	NONE
Manufacturer of oligonucleotides	D
Purification method	D
qPCR PROTOCOL
Complete reaction conditions	E	Pre-denaturazione 95℃ 1min Denaturazione 95℃ 20s Ricottura 55℃ 20s Estensione 72℃ 30s（To avoid excessive length, it was not described in the manuscript.）
Reaction volume and amount of cDNA/DNA	E	cDNA 3ul（To avoid excessive length, it was not described in the manuscript.）
Primer, (probe), Mg++ and dNTP concentrations	E	2xUniversal Blue SYBR Green qPCR Master Mix 5ul（To avoid excessive length, it was not described in the manuscript.）
Polymerase identity and concentration	E	2xUniversal Blue SYBR Green qPCR Master Mix 5ul（To avoid excessive length, it was not described in the manuscript.）
Buffer/kit identity and manufacturer	E	Hifair® Ⅲ 1st Strand cDNA Synthesis SuperMix for qPCR（To avoid excessive length, it was not described in the manuscript.）
Exact chemical constitution of the buffer	D
Additives (SYBR Green I, DMSO, etc.)	E	2xUniversal Blue SYBR Green qPCR Master Mix 5ul（To avoid excessive length, it was not described in the manuscript.）
Manufacturer of plates/tubes and catalog number	D
Complete thermocycling parameters	E	Pre-denaturazione 95℃ 1min Denaturazione 95℃ 20s Ricottura 55℃ 20s Estensione 72℃ 30s（To avoid excessive length, it was not described in the manuscript.）
Reaction setup (manual/robotic)	D
Manufacturer of qPCR instrument	E	BIO-RAD（To avoid excessive length, it was not described in the manuscript.）
qPCR VALIDATION
Evidence of optimisation (from gradients)	D
Specificity (gel, sequence, melt, or digest)	E	NONE
For SYBR Green I, Cq of the NTC	E	Real-time quantitative fluorescence PCR instrument finalizing the lysis curve 65-95°C 0.05s（To avoid excessive length, it was not described in the manuscript.）
Standard curves with slope and y-intercept	E	NONE
PCR efficiency calculated from slope	E	NONE
Confidence interval for PCR efficiency or standard error	D
r2 of standard curve	E	NONE
Linear dynamic range	E	NONE
Cq variation at lower limit	E	NONE
Confidence intervals throughout range	D
Evidence for limit of detection	E	NONE
If multiplex, efficiency and LOD of each assay.	E	NONE
DATA ANALYSIS
qPCR analysis program (source, version)	E	BIO-RAD
Cq method determination	E	Automatic threshold determination（To avoid excessive length, it was not described in the manuscript.）
Outlier identification and disposition	E	Outliers identified by deviation from mean Cq values and excluded from final analysis（To avoid excessive length, it was not described in the manuscript.）
Results of NTCs	E	No amplification detected in NTC（To avoid excessive length, it was not described in the manuscript.）
Justification of number and choice of reference genes	E	GAPDH used as a reference gene due to its stable expression across all samples（line 243）
Description of normalisation method	E	ΔΔCq method used for normalization with GAPDH as the reference gene.（line 241）
Number and concordance of biological replicates	D
Number and stage (RT or qPCR) of technical replicates	E	Three technical replicates per sample at the qPCR stage.（To avoid excessive length, it was not described in the manuscript.）
Repeatability (intra-assay variation)	E	3（To avoid excessive length, it was not described in the manuscript.）
Reproducibility (inter-assay variation, %CV)	D
Power analysis	D
Statistical methods for result significance	E	Statistical significance determined using GraphPad Prism 10（line 243）
Software (source, version)	E	GraphPad Prism 10（line 243）
Cq or raw data submission using RDML	D
Table 1. MIQE checklist for authors, reviewers and editors. All essential information (E) must be submitted with the manuscript. Desirable
information (D) should be submitted if available. If using primers obtained from RTPrimerDB, information on qPCR target, oligonucleotides,
protocols and validation is available from that source.
*: Assessing the absence of DNA using a no RT assay is essential when first extracting RNA. Once the sample has been validated as
RDNA-free, inclusion of a no-RT control is desirable, but no longer essential.
**: Disclosure of the probe sequence is highly desirable and strongly encouraged. However, since not all commercial pre-designed assay
vendors provide this information, it cannot be an essential requirement. Use of such assays is advised against.
