# Supplementary figures and images for: Exploration of prognostic genes associated with lymphangiogenesis in breast cancer based on transcriptomics and experimental verification
Source: PeerJ journal article supplement (doi:10.7717/peerj.19890), 2025-08-27

**Relative CD24 level  
(to GAPDH)**

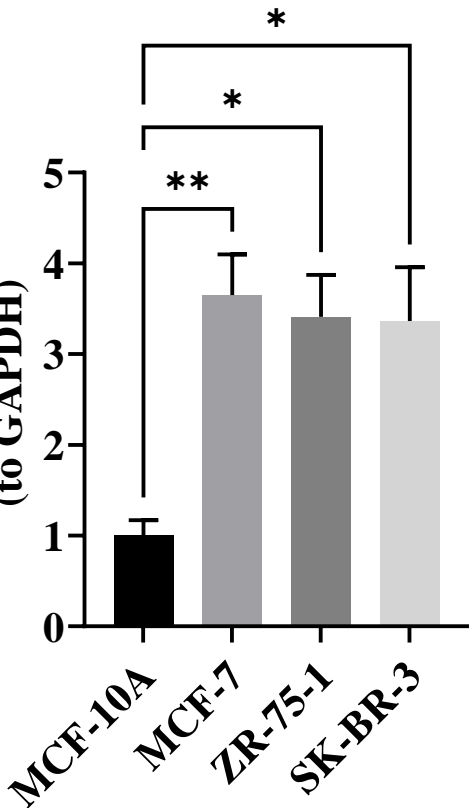

Supplement: Supplemental_Data_S4.zip [file Supplemental_Data_S4.zip]

**Relative CEBPD level  
(to GAPDH)**

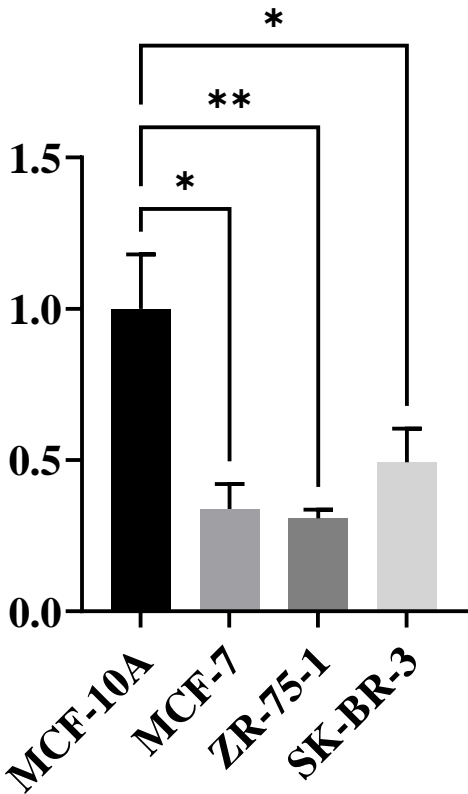

Supplement: Supplemental_Data_S4.zip [file Supplemental_Data_S4.zip]

**Relative ZIC2 level  
(to GAPDH)**

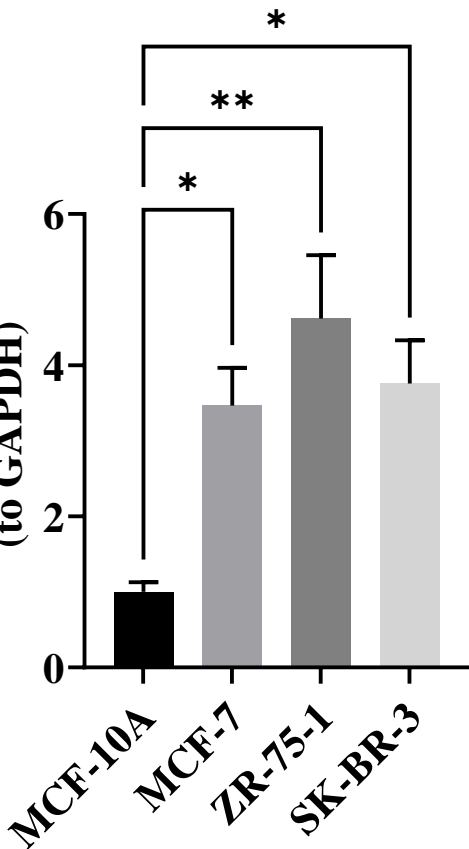

Supplement: Supplemental_Data_S4.zip [file Supplemental_Data_S4.zip]

**Relative CCL19 level  
(to GAPDH)**

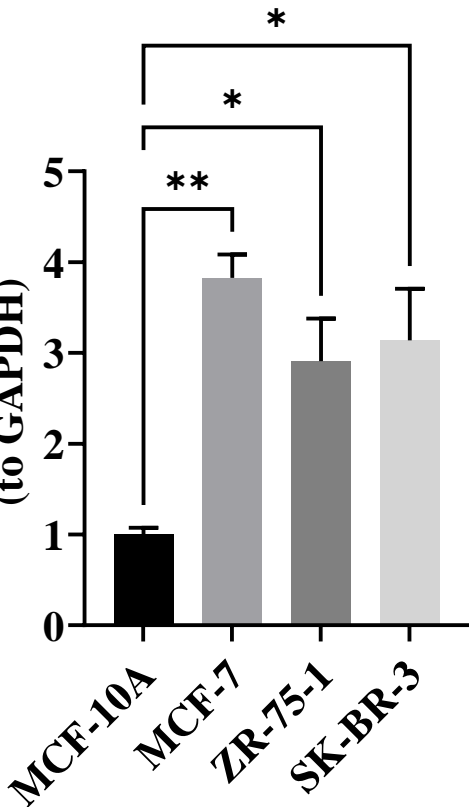

Supplement: Supplemental_Data_S4.zip [file Supplemental_Data_S4.zip]
